# Supplementary material
Source: publisher figshare collection journal article supplement (https://tandf.figshare.com/articles/dataset/_/9974156)
Supplement: Supplementary file 1 [file 1]

Archive with 3 entries (3 files):
- lsrt_a_1661447_sm4065.pdf
- lsrt_a_1661447_sm4054.doc
- lsrt_a_1661447_sm3917.cif
