# Supplementary material
Source: publisher figshare collection journal article supplement (https://tandf.figshare.com/articles/dataset/_/9974156)
Supplement: Supplementary file 1 [file 1 › lsrt_a_1661447_sm3917.cif]

 
data_1
 
_audit_creation_method            'SHELXL-2014/7'
_shelx_SHELXL_version_number      '2014/7'
_chemical_name_systematic         ?
_chemical_name_common             ?
_chemical_melting_point           ?
_chemical_formula_moiety          ?
_chemical_formula_sum
 'C18 H11 Ag N2 O3' 
_chemical_formula_weight          411.16

loop_
 _atom_type_symbol
 _atom_type_description
 _atom_type_scat_dispersion_real
 _atom_type_scat_dispersion_imag
 _atom_type_scat_source
 'C'  'C'   0.0033   0.0016
 'International Tables Vol C Tables 4.2.6.8 and 6.1.1.4'
 'H'  'H'   0.0000   0.0000
 'International Tables Vol C Tables 4.2.6.8 and 6.1.1.4'
 'N'  'N'   0.0061   0.0033
 'International Tables Vol C Tables 4.2.6.8 and 6.1.1.4'
 'O'  'O'   0.0106   0.0060
 'International Tables Vol C Tables 4.2.6.8 and 6.1.1.4'
 'Ag'  'Ag'  -0.8971   1.1015
 'International Tables Vol C Tables 4.2.6.8 and 6.1.1.4'
 
_space_group_crystal_system       monoclinic
_space_group_IT_number            15
_space_group_name_H-M_alt         'C 2/c'
_space_group_name_Hall            '-C 2yc'
 
_shelx_space_group_comment
;
The symmetry employed for this shelxl refinement is uniquely defined
by the following loop, which should always be used as a source of
symmetry information in preference to the above space-group names.
They are only intended as comments.
;
 
loop_
 _space_group_symop_operation_xyz
 'x, y, z'
 '-x, y, -z+1/2'
 'x+1/2, y+1/2, z'
 '-x+1/2, y+1/2, -z+1/2'
 '-x, -y, -z'
 'x, -y, z-1/2'
 '-x+1/2, -y+1/2, -z'
 'x+1/2, -y+1/2, z-1/2'
 
_cell_length_a                    17.319(4)
_cell_length_b                    11.500(2)
_cell_length_c                    15.459(3)
_cell_angle_alpha                 90
_cell_angle_beta                  99.80(3)
_cell_angle_gamma                 90
_cell_volume                      3034.4(11)
_cell_formula_units_Z             8
_cell_measurement_temperature     293(2)
_cell_measurement_reflns_used     12100
_cell_measurement_theta_min       3.3
_cell_measurement_theta_max       27.6 
 
_exptl_crystal_description        'Block'
_exptl_crystal_colour             'Yellow'
_exptl_crystal_density_meas       ?
_exptl_crystal_density_method     'not measured'
_exptl_crystal_density_diffrn     1.800          
_exptl_crystal_F_000              1632
_exptl_transmission_factor_min    ?
_exptl_transmission_factor_max    ?
_exptl_crystal_size_max           0.20
_exptl_crystal_size_mid           0.20
_exptl_crystal_size_min           0.20
_exptl_absorpt_coefficient_mu     1.347
_shelx_estimated_absorpt_T_min    ?
_shelx_estimated_absorpt_T_max    ?
_exptl_absorpt_correction_type    NONE
_exptl_absorpt_correction_T_min   ?
_exptl_absorpt_correction_T_max   ?
_exptl_absorpt_process_details    ?
_exptl_absorpt_special_details    ?
_diffrn_ambient_temperature       293(2)
_diffrn_radiation_wavelength      0.71073
_diffrn_radiation_type            MoK\a
_diffrn_source                    ?
_diffrn_measurement_device_type   'Bruker P4'
_diffrn_measurement_method        '\w scans'
_diffrn_detector_area_resol_mean  ?
_diffrn_reflns_number             12791
_diffrn_reflns_av_unetI/netI      0.0490
_diffrn_reflns_av_R_equivalents   0.0685
_diffrn_reflns_limit_h_min        -20
_diffrn_reflns_limit_h_max        20
_diffrn_reflns_limit_k_min        -13
_diffrn_reflns_limit_k_max        13
_diffrn_reflns_limit_l_min        -18
_diffrn_reflns_limit_l_max        18
_diffrn_reflns_theta_min          3.260
_diffrn_reflns_theta_max          25.009
_diffrn_reflns_theta_full         25.009
_diffrn_measured_fraction_theta_max   0.998
_diffrn_measured_fraction_theta_full  0.998
_diffrn_reflns_Laue_measured_fraction_max    0.998
_diffrn_reflns_Laue_measured_fraction_full   0.998
_diffrn_reflns_point_group_measured_fraction_max   0.998
_diffrn_reflns_point_group_measured_fraction_full  0.998
_reflns_number_total              2675
_reflns_number_gt                 1957
_reflns_threshold_expression      'I > 2\s(I)'
_reflns_Friedel_coverage          0.000
_reflns_Friedel_fraction_max      .
_reflns_Friedel_fraction_full     .
 
_reflns_special_details
;
 Reflections were merged by SHELXL according to the crystal
 class for the calculation of statistics and refinement.
 
 _reflns_Friedel_fraction is defined as the number of unique
 Friedel pairs measured divided by the number that would be
 possible theoretically, ignoring centric projections and
 systematic absences.
;
 
_computing_data_collection        'Bruker XSCANS' 
_computing_cell_refinement        'Bruker XSCANS'
_computing_data_reduction         'Bruker SHELXTL'
_computing_structure_solution     'SHELXS-2014/7 (Sheldrick, 2014)
_computing_structure_refinement   'SHELXL-2014/7 (Sheldrick, 2014)'
_computing_molecular_graphics     'Bruker SHELXTL' 
_computing_publication_material   'Bruker SHELXTL' 
_refine_special_details           ?
_refine_ls_structure_factor_coef  Fsqd
_refine_ls_matrix_type            full
_refine_ls_weighting_scheme       calc
_refine_ls_weighting_details
'w=1/[\s^2^(Fo^2^)+(0.0664P)^2^+2.0062P] where P=(Fo^2^+2Fc^2^)/3'
_atom_sites_solution_primary      ?
_atom_sites_solution_secondary    ?
_atom_sites_solution_hydrogens    geom
_refine_ls_hydrogen_treatment     constr
_refine_ls_extinction_method      none
_refine_ls_extinction_coef        .
_refine_ls_number_reflns          2675
_refine_ls_number_parameters      217
_refine_ls_number_restraints      0
_refine_ls_R_factor_all           0.0808
_refine_ls_R_factor_gt            0.0491
_refine_ls_wR_factor_ref          0.1203
_refine_ls_wR_factor_gt           0.1060
_refine_ls_goodness_of_fit_ref    1.000
_refine_ls_restrained_S_all       1.000
_refine_ls_shift/su_max           0.000
_refine_ls_shift/su_mean          0.000
 
loop_
 _atom_site_label
 _atom_site_type_symbol
 _atom_site_fract_x
 _atom_site_fract_y
 _atom_site_fract_z
 _atom_site_U_iso_or_equiv
 _atom_site_adp_type
 _atom_site_occupancy
 _atom_site_site_symmetry_order  
 _atom_site_calc_flag
 _atom_site_refinement_flags_posn
 _atom_site_refinement_flags_adp
 _atom_site_refinement_flags_occupancy
 _atom_site_disorder_assembly
 _atom_site_disorder_group
Ag1 Ag 0.42619(3) 0.44039(3) 0.17941(3) 0.0479(2) Uani 1 1 d . . . . .
C4 C 0.2698(4) 0.5726(5) 0.5334(4) 0.0470(15) Uani 1 1 d . . . . .
H4A H 0.2655 0.6462 0.5570 0.056 Uiso 1 1 calc R U . . .
N1 N 0.4197(2) 0.2489(4) 0.1579(3) 0.0358(11) Uani 1 1 d . . . . .
O1 O 0.3132(3) 0.4398(3) 0.2750(3) 0.0577(12) Uani 1 1 d . . . . .
C14 C 0.4177(3) -0.1235(4) 0.1534(3) 0.0306(12) Uani 1 1 d . . . . .
C10 C 0.3581(3) 0.0680(4) 0.1822(3) 0.0343(12) Uani 1 1 d . . . . .
H10A H 0.3166 0.0293 0.2006 0.041 Uiso 1 1 calc R U . . .
C11 C 0.4182(3) 0.0048(4) 0.1536(3) 0.0303(12) Uani 1 1 d . . . . .
O3 O 0.3395(2) 0.2136(3) 0.3775(2) 0.0490(11) Uani 1 1 d . . . . .
C1 C 0.3593(4) 0.4416(4) 0.3474(4) 0.0448(15) Uani 1 1 d . . . . .
C9 C 0.3608(3) 0.1877(4) 0.1830(3) 0.0348(12) Uani 1 1 d . . . . .
H9A H 0.3202 0.2282 0.2016 0.042 Uiso 1 1 calc R U . . .
C3 C 0.3118(3) 0.5566(4) 0.4649(4) 0.0430(14) Uani 1 1 d . . . . .
H3A H 0.3358 0.6203 0.4434 0.052 Uiso 1 1 calc R U . . .
C2 C 0.3186(3) 0.4474(4) 0.4279(3) 0.0333(12) Uani 1 1 d . . . . .
C12 C 0.4782(3) 0.0698(4) 0.1275(4) 0.0370(13) Uani 1 1 d . . . . .
H12A H 0.5194 0.0319 0.1079 0.044 Uiso 1 1 calc R U . . .
C13 C 0.4771(3) 0.1890(5) 0.1304(3) 0.0384(13) Uani 1 1 d . . . . .
H13A H 0.5179 0.2299 0.1125 0.046 Uiso 1 1 calc R U . . .
C18 C 0.4596(3) -0.1883(5) 0.1020(4) 0.0407(13) Uani 1 1 d . . . . .
H18A H 0.4878 -0.1509 0.0640 0.049 Uiso 1 1 calc R U . . .
C5 C 0.2346(3) 0.4778(4) 0.5659(4) 0.0385(13) Uani 1 1 d . . . . .
H5A H 0.2055 0.4881 0.6106 0.046 Uiso 1 1 calc R U . . .
C8 C 0.2967(3) 0.2326(4) 0.4314(3) 0.0285(11) Uani 1 1 d . . . . .
C7 C 0.2850(3) 0.3515(4) 0.4635(3) 0.0284(12) Uani 1 1 d . . . . .
C6 C 0.2424(3) 0.3673(4) 0.5320(3) 0.0269(11) Uani 1 1 d . . . . .
O2 O 0.4310(3) 0.4455(4) 0.3611(3) 0.0678(14) Uani 1 1 d . . . . .
N2 N 0.4219(2) -0.3679(4) 0.1604(3) 0.0352(11) Uani 1 1 d . . . . .
C15 C 0.3761(3) -0.1866(4) 0.2084(3) 0.0387(13) Uani 1 1 d . . . . .
H15A H 0.3461 -0.1484 0.2440 0.046 Uiso 1 1 calc R U . . .
C16 C 0.3807(3) -0.3058(5) 0.2084(4) 0.0430(14) Uani 1 1 d . . . . .
H16A H 0.3527 -0.3460 0.2450 0.052 Uiso 1 1 calc R U . . .
C17 C 0.4600(3) -0.3080(5) 0.1067(4) 0.0417(14) Uani 1 1 d . . . . .
H17A H 0.4882 -0.3492 0.0706 0.050 Uiso 1 1 calc R U . . .
 
loop_
 _atom_site_aniso_label
 _atom_site_aniso_U_11
 _atom_site_aniso_U_22
 _atom_site_aniso_U_33
 _atom_site_aniso_U_23
 _atom_site_aniso_U_13
 _atom_site_aniso_U_12
Ag1 0.0638(4) 0.0220(3) 0.0637(4) 0.0003(2) 0.0277(2) -0.0028(2)
C4 0.062(4) 0.036(3) 0.043(4) -0.009(3) 0.007(3) -0.002(3)
N1 0.038(3) 0.031(2) 0.039(3) -0.002(2) 0.010(2) -0.004(2)
O1 0.076(3) 0.060(3) 0.044(3) 0.013(2) 0.028(2) 0.019(2)
C14 0.030(3) 0.025(3) 0.032(3) -0.004(2) -0.007(2) 0.001(2)
C10 0.037(3) 0.031(3) 0.035(3) 0.003(2) 0.006(2) -0.005(2)
C11 0.036(3) 0.026(3) 0.027(3) -0.002(2) 0.002(2) 0.003(2)
O3 0.066(3) 0.036(2) 0.055(3) -0.0014(19) 0.040(2) -0.0010(19)
C1 0.056(4) 0.023(3) 0.064(4) 0.004(3) 0.036(3) -0.002(3)
C9 0.032(3) 0.031(3) 0.042(3) 0.003(3) 0.009(2) 0.003(2)
C3 0.045(3) 0.033(3) 0.054(4) 0.004(3) 0.016(3) -0.005(3)
C2 0.031(3) 0.032(3) 0.038(3) 0.002(3) 0.008(2) -0.005(2)
C12 0.032(3) 0.031(3) 0.051(4) 0.000(3) 0.017(3) 0.002(2)
C13 0.035(3) 0.035(3) 0.049(3) -0.004(3) 0.017(3) -0.003(2)
C18 0.047(4) 0.032(3) 0.047(3) 0.004(3) 0.016(3) 0.002(3)
C5 0.045(3) 0.035(3) 0.038(3) -0.007(3) 0.013(3) -0.001(3)
C8 0.024(3) 0.034(3) 0.029(3) 0.002(2) 0.011(2) -0.002(2)
C7 0.026(3) 0.027(3) 0.032(3) 0.001(2) 0.004(2) 0.000(2)
C6 0.024(3) 0.028(3) 0.027(3) 0.000(2) 0.003(2) 0.001(2)
O2 0.047(3) 0.061(3) 0.108(4) -0.008(3) 0.047(3) -0.007(2)
N2 0.037(3) 0.022(2) 0.047(3) -0.006(2) 0.008(2) 0.0005(19)
C15 0.052(4) 0.030(3) 0.039(3) 0.005(3) 0.020(3) 0.000(3)
C16 0.055(4) 0.028(3) 0.050(4) 0.009(3) 0.019(3) 0.001(3)
C17 0.042(3) 0.025(3) 0.062(4) -0.006(3) 0.019(3) -0.002(2)
 
_geom_special_details
;
 All esds (except the esd in the dihedral angle between two l.s. planes)
 are estimated using the full covariance matrix.  The cell esds are taken
 into account individually in the estimation of esds in distances, angles
 and torsion angles; correlations between esds in cell parameters are only
 used when they are defined by crystal symmetry.  An approximate (isotropic)
 treatment of cell esds is used for estimating esds involving l.s. planes.
;
 
loop_
 _geom_bond_atom_site_label_1
 _geom_bond_atom_site_label_2
 _geom_bond_distance
 _geom_bond_site_symmetry_2
 _geom_bond_publ_flag
Ag1 N2 2.224(4) 1_565 ?
Ag1 N1 2.227(4) . ?
Ag1 Ag1 3.0662(14) 2_655 ?
C4 C5 1.385(7) . ?
C4 C3 1.395(8) . ?
C4 H4A 0.9300 . ?
N1 C13 1.336(6) . ?
N1 C9 1.350(6) . ?
O1 C1 1.259(7) . ?
C14 C18 1.384(7) . ?
C14 C15 1.405(7) . ?
C14 C11 1.475(7) . ?
C10 C9 1.377(6) . ?
C10 C11 1.402(7) . ?
C10 H10A 0.9300 . ?
C11 C12 1.394(7) . ?
O3 C8 1.225(5) . ?
C1 O2 1.225(7) . ?
C1 C2 1.533(8) . ?
C9 H9A 0.9300 . ?
C3 C2 1.393(7) . ?
C3 H3A 0.9300 . ?
C2 C7 1.403(6) . ?
C12 C13 1.373(7) . ?
C12 H12A 0.9300 . ?
C13 H13A 0.9300 . ?
C18 C17 1.378(7) . ?
C18 H18A 0.9300 . ?
C5 C6 1.390(7) . ?
C5 H5A 0.9300 . ?
C8 C7 1.481(7) . ?
C8 C6 1.493(6) 7_556 ?
C7 C6 1.401(7) . ?
C6 C8 1.493(6) 7_556 ?
N2 C16 1.322(7) . ?
N2 C17 1.337(7) . ?
N2 Ag1 2.224(4) 1_545 ?
C15 C16 1.373(7) . ?
C15 H15A 0.9300 . ?
C16 H16A 0.9300 . ?
C17 H17A 0.9300 . ?
 
loop_
 _geom_angle_atom_site_label_1
 _geom_angle_atom_site_label_2
 _geom_angle_atom_site_label_3
 _geom_angle
 _geom_angle_site_symmetry_1
 _geom_angle_site_symmetry_3
 _geom_angle_publ_flag
N2 Ag1 N1 163.90(16) 1_565 . ?
N2 Ag1 Ag1 95.70(10) 1_565 2_655 ?
N1 Ag1 Ag1 96.96(11) . 2_655 ?
C5 C4 C3 119.4(5) . . ?
C5 C4 H4A 120.3 . . ?
C3 C4 H4A 120.3 . . ?
C13 N1 C9 117.5(5) . . ?
C13 N1 Ag1 122.4(3) . . ?
C9 N1 Ag1 119.6(3) . . ?
C18 C14 C15 116.2(5) . . ?
C18 C14 C11 122.4(5) . . ?
C15 C14 C11 121.3(5) . . ?
C9 C10 C11 119.6(5) . . ?
C9 C10 H10A 120.2 . . ?
C11 C10 H10A 120.2 . . ?
C12 C11 C10 116.3(5) . . ?
C12 C11 C14 122.7(5) . . ?
C10 C11 C14 120.9(5) . . ?
O2 C1 O1 128.7(6) . . ?
O2 C1 C2 116.8(6) . . ?
O1 C1 C2 114.4(5) . . ?
N1 C9 C10 123.0(5) . . ?
N1 C9 H9A 118.5 . . ?
C10 C9 H9A 118.5 . . ?
C2 C3 C4 121.4(5) . . ?
C2 C3 H3A 119.3 . . ?
C4 C3 H3A 119.3 . . ?
C3 C2 C7 118.6(5) . . ?
C3 C2 C1 117.1(4) . . ?
C7 C2 C1 124.3(4) . . ?
C13 C12 C11 120.7(5) . . ?
C13 C12 H12A 119.7 . . ?
C11 C12 H12A 119.7 . . ?
N1 C13 C12 122.8(5) . . ?
N1 C13 H13A 118.6 . . ?
C12 C13 H13A 118.6 . . ?
C17 C18 C14 120.4(5) . . ?
C17 C18 H18A 119.8 . . ?
C14 C18 H18A 119.8 . . ?
C4 C5 C6 120.4(5) . . ?
C4 C5 H5A 119.8 . . ?
C6 C5 H5A 119.8 . . ?
O3 C8 C7 121.7(4) . . ?
O3 C8 C6 119.1(4) . 7_556 ?
C7 C8 C6 119.1(4) . 7_556 ?
C6 C7 C2 120.1(4) . . ?
C6 C7 C8 119.5(4) . . ?
C2 C7 C8 120.3(4) . . ?
C5 C6 C7 120.0(5) . . ?
C5 C6 C8 118.8(4) . 7_556 ?
C7 C6 C8 121.2(4) . 7_556 ?
C16 N2 C17 116.1(5) . . ?
C16 N2 Ag1 118.1(4) . 1_545 ?
C17 N2 Ag1 125.7(3) . 1_545 ?
C16 C15 C14 118.7(5) . . ?
C16 C15 H15A 120.6 . . ?
C14 C15 H15A 120.6 . . ?
N2 C16 C15 125.2(5) . . ?
N2 C16 H16A 117.4 . . ?
C15 C16 H16A 117.4 . . ?
N2 C17 C18 123.3(5) . . ?
N2 C17 H17A 118.4 . . ?
C18 C17 H17A 118.4 . . ?
 
loop_
 _geom_torsion_atom_site_label_1
 _geom_torsion_atom_site_label_2
 _geom_torsion_atom_site_label_3
 _geom_torsion_atom_site_label_4
 _geom_torsion
 _geom_torsion_site_symmetry_1
 _geom_torsion_site_symmetry_2
 _geom_torsion_site_symmetry_3
 _geom_torsion_site_symmetry_4
 _geom_torsion_publ_flag
C9 C10 C11 C12 0.2(7) . . . . ?
C9 C10 C11 C14 178.9(5) . . . . ?
C18 C14 C11 C12 -22.2(7) . . . . ?
C15 C14 C11 C12 155.6(5) . . . . ?
C18 C14 C11 C10 159.1(5) . . . . ?
C15 C14 C11 C10 -23.0(7) . . . . ?
C13 N1 C9 C10 0.7(7) . . . . ?
Ag1 N1 C9 C10 -171.5(4) . . . . ?
C11 C10 C9 N1 -0.6(8) . . . . ?
C5 C4 C3 C2 0.5(9) . . . . ?
C4 C3 C2 C7 -2.7(8) . . . . ?
C4 C3 C2 C1 174.3(6) . . . . ?
O2 C1 C2 C3 78.8(6) . . . . ?
O1 C1 C2 C3 -97.5(6) . . . . ?
O2 C1 C2 C7 -104.4(6) . . . . ?
O1 C1 C2 C7 79.3(6) . . . . ?
C10 C11 C12 C13 0.0(8) . . . . ?
C14 C11 C12 C13 -178.6(5) . . . . ?
C9 N1 C13 C12 -0.4(8) . . . . ?
Ag1 N1 C13 C12 171.6(4) . . . . ?
C11 C12 C13 N1 0.0(8) . . . . ?
C15 C14 C18 C17 -0.6(7) . . . . ?
C11 C14 C18 C17 177.3(5) . . . . ?
C3 C4 C5 C6 1.4(9) . . . . ?
C3 C2 C7 C6 3.0(7) . . . . ?
C1 C2 C7 C6 -173.7(5) . . . . ?
C3 C2 C7 C8 -174.7(5) . . . . ?
C1 C2 C7 C8 8.6(8) . . . . ?
O3 C8 C7 C6 -173.1(5) . . . . ?
C6 C8 C7 C6 4.8(7) 7_556 . . . ?
O3 C8 C7 C2 4.6(7) . . . . ?
C6 C8 C7 C2 -177.5(4) 7_556 . . . ?
C4 C5 C6 C7 -1.1(8) . . . . ?
C4 C5 C6 C8 -179.7(5) . . . 7_556 ?
C2 C7 C6 C5 -1.1(7) . . . . ?
C8 C7 C6 C5 176.6(4) . . . . ?
C2 C7 C6 C8 177.4(4) . . . 7_556 ?
C8 C7 C6 C8 -4.9(7) . . . 7_556 ?
C18 C14 C15 C16 0.9(7) . . . . ?
C11 C14 C15 C16 -177.0(5) . . . . ?
C17 N2 C16 C15 -1.7(8) . . . . ?
Ag1 N2 C16 C15 175.8(4) 1_545 . . . ?
C14 C15 C16 N2 0.2(9) . . . . ?
C16 N2 C17 C18 2.0(8) . . . . ?
Ag1 N2 C17 C18 -175.3(4) 1_545 . . . ?
C14 C18 C17 N2 -0.9(9) . . . . ?
 
_refine_diff_density_max    0.633
_refine_diff_density_min   -0.361
_refine_diff_density_rms    0.085

_shelx_res_file
;

    2.res created by SHELXL-2014/7


TITL 2 in C2/c
CELL 0.71073  17.3195  11.5005  15.4595  90.000  99.796  90.000
ZERR   8   0.0035   0.0023   0.0031   0.000   0.030   0.000
LATT  7
SYMM -X, Y, 0.5-Z
SFAC C H N O AG
UNIT 144 88 16 24 8

L.S. 4
ACTA
BOND $H
HTAB
CONF
FMAP 2
PLAN 20
OMIT -3.00 50.02
WGHT    0.066400    2.006200
FVAR       0.06842
AG1   5    0.426186    0.440394    0.179412    11.00000    0.06378    0.02203 =
         0.06372    0.00027    0.02769   -0.00277
C4    1    0.269810    0.572619    0.533370    11.00000    0.06184    0.03580 =
         0.04290   -0.00870    0.00750   -0.00175
AFIX  43
H4A   2    0.265485    0.646240    0.556973    11.00000   -1.20000
AFIX   0
N1    3    0.419715    0.248920    0.157853    11.00000    0.03776    0.03137 =
         0.03942   -0.00195    0.00977   -0.00365
O1    4    0.313159    0.439832    0.274996    11.00000    0.07589    0.05990 =
         0.04364    0.01333    0.02838    0.01926
C14   1    0.417671   -0.123483    0.153437    11.00000    0.03034    0.02506 =
         0.03226   -0.00377   -0.00672    0.00141
C10   1    0.358119    0.067985    0.182226    11.00000    0.03725    0.03075 =
         0.03473    0.00260    0.00604   -0.00518
AFIX  43
H10A  2    0.316639    0.029284    0.200645    11.00000   -1.20000
AFIX   0
C11   1    0.418230    0.004801    0.153557    11.00000    0.03568    0.02646 =
         0.02742   -0.00240    0.00175    0.00284
O3    4    0.339528    0.213570    0.377531    11.00000    0.06607    0.03649 =
         0.05489   -0.00136    0.03997   -0.00100
C1    1    0.359260    0.441604    0.347374    11.00000    0.05605    0.02292 =
         0.06442    0.00405    0.03628   -0.00158
C9    1    0.360819    0.187690    0.182970    11.00000    0.03204    0.03127 =
         0.04188    0.00321    0.00851    0.00292
AFIX  43
H9A   2    0.320180    0.228199    0.201642    11.00000   -1.20000
AFIX   0
C3    1    0.311828    0.556636    0.464864    11.00000    0.04520    0.03274 =
         0.05368    0.00417    0.01587   -0.00546
AFIX  43
H3A   2    0.335805    0.620264    0.443401    11.00000   -1.20000
AFIX   0
C2    1    0.318624    0.447430    0.427944    11.00000    0.03141    0.03161 =
         0.03753    0.00218    0.00752   -0.00477
C12   1    0.478209    0.069763    0.127463    11.00000    0.03244    0.03077 =
         0.05139   -0.00005    0.01728    0.00199
AFIX  43
H12A  2    0.519442    0.031910    0.107866    11.00000   -1.20000
AFIX   0
C13   1    0.477050    0.189021    0.130390    11.00000    0.03480    0.03474 =
         0.04907   -0.00425    0.01717   -0.00340
AFIX  43
H13A  2    0.517921    0.229863    0.112493    11.00000   -1.20000
AFIX   0
C18   1    0.459641   -0.188338    0.101962    11.00000    0.04677    0.03154 =
         0.04662    0.00441    0.01558    0.00207
AFIX  43
H18A  2    0.487780   -0.150944    0.063967    11.00000   -1.20000
AFIX   0
C5    1    0.234610    0.477772    0.565869    11.00000    0.04471    0.03472 =
         0.03804   -0.00702    0.01308   -0.00121
AFIX  43
H5A   2    0.205547    0.488098    0.610632    11.00000   -1.20000
AFIX   0
C8    1    0.296727    0.232565    0.431413    11.00000    0.02444    0.03429 =
         0.02894    0.00197    0.01061   -0.00166
C7    1    0.285012    0.351520    0.463534    11.00000    0.02638    0.02677 =
         0.03160    0.00077    0.00365    0.00014
C6    1    0.242438    0.367268    0.532023    11.00000    0.02436    0.02841 =
         0.02749   -0.00032    0.00334    0.00063
O2    4    0.430998    0.445493    0.361081    11.00000    0.04658    0.06081 =
         0.10782   -0.00848    0.04698   -0.00660
N2    3    0.421873   -0.367872    0.160385    11.00000    0.03669    0.02234 =
         0.04687   -0.00559    0.00787    0.00048
C15   1    0.376135   -0.186625    0.208359    11.00000    0.05177    0.02966 =
         0.03914    0.00501    0.02044    0.00041
AFIX  43
H15A  2    0.346108   -0.148440    0.244024    11.00000   -1.20000
AFIX   0
C16   1    0.380736   -0.305768    0.208353    11.00000    0.05498    0.02777 =
         0.04980    0.00909    0.01914    0.00084
AFIX  43
H16A  2    0.352684   -0.346000    0.245007    11.00000   -1.20000
AFIX   0
C17   1    0.459993   -0.308008    0.106658    11.00000    0.04223    0.02494 =
         0.06157   -0.00573    0.01902   -0.00215
AFIX  43
H17A  2    0.488170   -0.349175    0.070635    11.00000   -1.20000

AFIX   0
HKLF 4

REM  2 in C2/c
REM R1 =  0.0491 for    1957 Fo > 4sig(Fo)  and  0.0808 for all    2675 data
REM    217 parameters refined using      0 restraints

END

WGHT      0.0373      2.2616

REM Instructions for potential hydrogen bonds
EQIV $1 -x+1/2, y-1/2, -z+1/2
HTAB C10 O1_$1
EQIV $2 -x+1, y, -z+1/2
HTAB C13 O3_$2
HTAB C13 O2_$2
EQIV $3 x, y-1, z
HTAB C16 O1_$3

REM Highest difference peak  0.633,  deepest hole -0.361,  1-sigma level  0.085
Q1    1   0.4394  0.4459  0.1272  11.00000  0.05    0.63
Q2    1   0.2980  0.5609  0.5044  11.00000  0.05    0.34
Q3    1   0.2932  0.4994  0.4369  11.00000  0.05    0.33
Q4    1   0.3133  0.4448  0.3718  11.00000  0.05    0.32
Q5    1   0.3917  0.0471  0.1488  11.00000  0.05    0.32
Q6    1   0.3639  0.2927  0.3791  11.00000  0.05    0.30
Q7    1   0.3008  0.2246  0.3788  11.00000  0.05    0.29
Q8    1   0.3545 -0.1193  0.3252  11.00000  0.05    0.28
Q9    1   0.4924 -0.5177  0.0191  11.00000  0.05    0.28
Q10   1   0.4490 -0.1609  0.1590  11.00000  0.05    0.28
Q11   1   0.4493 -0.3261  0.1448  11.00000  0.05    0.28
Q12   1   0.3596  0.0531  0.1295  11.00000  0.05    0.27
Q13   1   0.3829 -0.3163  0.1583  11.00000  0.05    0.27
Q14   1   0.3463  0.6585  0.4433  11.00000  0.05    0.27
Q15   1   0.2978  0.5995  0.5968  11.00000  0.05    0.27
Q16   1   0.4953  0.0248  0.0351  11.00000  0.05    0.27
Q17   1   0.4477 -0.1467  0.0168  11.00000  0.05    0.26
Q18   1   0.3688  0.4465  0.4085  11.00000  0.05    0.26
Q19   1   0.4779  0.4751  0.2175  11.00000  0.05    0.26
Q20   1   0.4551  0.4190  0.2219  11.00000  0.05    0.26
;
_shelx_res_checksum   86344

_shelx_hkl_file
;
   0   0   3    0.39    0.39
   0   0   3    0.32    0.18
   0   0  -3    0.36    0.27
   0   0   4  361.14    7.84
   0   0  -4  374.13    6.47
   0   0   5   -0.64    0.58
   0   0  -5   -0.20    0.32
   0   0   6  401.89   10.39
   0   0  -6  425.30    9.03
   0   0   7   -0.97    0.80
   0   0  -7    0.44    0.51
   0   0   8  175.74    6.79
   0   0  -8  176.32    5.73
   0   0   9    1.71    1.26
   0   0  -9    0.39    0.47
   0   0  -9   -0.53    0.74
   0   0  10    5.52    1.95
   0   0 -10    3.48    1.18
   0   0 -10    4.28    0.78
   0   0  11    2.96    1.47
   0   0 -11    0.22    1.01
   0   0 -11    0.87    0.74
   0   0  12    5.09    2.27
   0   0 -12    1.00    1.34
   0   0 -12    2.61    0.80
   0   0  13   -1.53    1.86
   0   0 -13    0.02    1.14
   0   0 -13    0.60    0.74
   0   0  14   18.54    3.28
   0   0 -14   17.32    2.53
   0   0 -14   16.90    1.71
   0   0  15    1.12    2.39
   0   0 -15   -1.13    1.59
   0   0 -15    1.32    0.98
   0   0  16   -1.57    2.28
   0   0 -16    6.77    2.11
   0   0  17    0.21    2.43
   0   0 -17    1.42    1.97
   0   0  18    0.52    2.03
   0   0 -18   -1.40    2.03
   0   0  19    8.08    3.18
   0   0 -19   -1.39    2.43
   0   2   0  311.21    4.60
   0   2   0  294.48    3.79
   0  -2   0  267.12    4.44
   0  -2   0  278.53    3.78
   0   2   0  302.75    4.77
   0   2   1  148.12    2.35
   0   2   1  146.31    3.00
   0  -2   1  145.84    3.00
   0  -2   1  141.04    1.69
   0  -2  -1  147.15    2.79
   0   2  -1  145.36    1.69
   0   2  -1  147.07    3.05
   0  -2   2   54.12    0.72
   0   2   2   55.97    1.75
   0   2   2   54.95    1.03
   0  -2   2   52.93    1.76
   0  -2  -2   53.42    1.62
   0   2  -2   57.95    1.80
   0   2   3   34.39    1.55
   0  -2   3   35.19    1.74
   0  -2   3   33.75    0.68
   0  -2  -3   30.97    0.57
   0  -2  -3   33.85    1.50
   0  -2  -3   33.13    0.58
   0   2  -3   32.56    0.72
   0   2  -3   34.75    1.52
   0  -2   4    0.58    0.81
   0   2   4    1.14    0.59
   0  -2  -4    1.45    0.47
   0   2  -4    0.93    0.26
   0   2  -4   -0.04    0.50
   0   2   5    8.46    1.03
   0   2   5    8.64    0.35
   0  -2   5    9.05    1.21
   0   2  -5   10.27    0.57
   0  -2  -5   10.78    1.04
   0   2  -5   10.38    0.98
   0  -2  -5    9.29    0.33
   0  -2   6  144.47    5.16
   0   2   6  141.86    5.02
   0  -2  -6  138.03    4.61
   0   2  -6  142.61    4.52
   0   2  -6  140.55    3.34
   0  -2  -6  143.04    2.27
   0  -2   7   68.36    3.78
   0   2   7   73.17    3.71
   0   2  -7   73.38    2.40
   0   2  -7   68.32    2.98
   0  -2  -7   72.99    3.27
   0  -2  -7   72.18    1.62
   0  -2   8   84.00    4.40
   0   2   8   72.88    4.03
   0  -2  -8   83.56    2.07
   0  -2  -8   80.63    3.82
   0   2  -8   83.05    3.56
   0   2  -8   82.22    2.89
   0  -2   9   18.62    2.40
   0   2   9   16.48    2.12
   0   2  -9   16.24    1.63
   0  -2  -9   16.55    0.85
   0   2  -9   15.90    1.36
   0  -2  -9   15.32    1.91
   0  -2  10    0.71    1.69
   0   2  10    2.70    1.64
   0   2 -10    4.38    0.91
   0  -2 -10    1.98    0.52
   0  -2 -10    3.20    1.34
   0   2 -10    3.47    1.06
   0   2  11    6.52    2.06
   0  -2  11    5.17    2.41
   0  -2 -11    5.09    1.41
   0  -2 -11    4.04    0.64
   0   2 -11    4.93    1.33
   0   2 -11    3.89    1.10
   0   2  12   13.90    2.40
   0  -2  12   14.52    2.67
   0  -2 -12   10.14    1.89
   0   2 -12   10.69    1.74
   0   2 -12   13.56    1.86
   0  -2 -12   12.60    0.94
   0  -2  13    6.11    2.37
   0   2  13   12.69    2.64
   0   2 -13    7.84    1.68
   0   2 -13    6.31    1.70
   0  -2 -13    5.83    2.04
   0   2  14    6.79    2.23
   0  -2  14    4.34    2.95
   0  -2 -14    8.28    2.18
   0   2 -14    7.25    1.78
   0   2 -14    6.75    1.60
   0  -2  15   -1.65    2.38
   0   2  15    0.28    2.25
   0  -2 -15    3.80    1.79
   0   2 -15    1.21    1.23
   0  -2  16    0.50    2.90
   0   2  16    7.03    2.65
   0   2 -16    3.20    1.45
   0  -2 -16    1.12    2.14
   0   2 -16    0.02    1.86
   0   2  17    0.43    2.34
   0  -2  17    0.03    2.63
   0   2 -17   -1.78    1.58
   0  -2 -17   -0.02    2.02
   0  -2  18    0.79    1.80
   0   2  18    0.06    2.03
   0  -2 -18   -0.70    1.77
   0  -2  19    1.72    2.29
   0   2  19   -2.29    2.74
   0  -2 -19    1.12    2.46
   0   4   0   18.33    1.21
   0   4   0   18.09    1.13
   0   4   1  740.94   13.85
   0   4   1  744.85   12.07
   0   4  -1  729.10   13.60
   0  -4  -1  734.18   12.02
   0   4  -1  744.51   13.84
   0   4  -1  755.57    9.58
   0   4   2    7.26    0.89
   0  -4   2    5.65    0.92
   0   4   2    7.59    0.60
   0   4  -2    6.43    0.36
   0   4  -2    8.05    0.91
   0  -4  -2    7.55    0.82
   0   4   3    7.31    0.86
   0  -4   3    7.09    0.30
   0   4   3    7.00    0.57
   0  -4   3    6.61    1.07
   0   4  -3    7.89    0.29
   0   4  -3    8.51    0.93
   0  -4  -3    7.41    0.92
   0   4   4   34.59    1.08
   0   4   4   32.08    1.85
   0  -4   4   32.01    1.91
   0  -4  -4   31.29    1.93
   0   4  -4   30.70    2.01
   0  -4   5  150.24    5.26
   0   4   5  148.93    5.25
   0  -4  -5  152.12    5.19
   0  -4  -5  149.71    2.35
   0   4  -5  143.97    1.75
   0   4  -5  151.87    5.19
   0  -4   6    4.43    1.11
   0   4   6    2.80    0.90
   0  -4  -6    2.57    0.83
   0   4  -6    2.09    0.83
   0  -4  -6    2.40    0.18
   0   4  -6    2.96    0.29
   0   4   7  120.26    5.24
   0  -4   7  116.86    5.59
   0   4  -7  112.78    4.85
   0   4  -7  110.25    2.57
   0  -4  -7  120.58    4.92
   0  -4   8    0.84    1.27
   0   4   8    1.91    1.06
   0  -4  -8    0.58    1.10
   0   4  -8    2.51    1.11
   0   4  -8    1.57    0.52
   0  -4   9   26.38    2.75
   0   4   9   25.29    2.72
   0  -4  -9   23.94    2.48
   0   4  -9   22.26    1.24
   0   4  -9   19.76    2.05
   0   4  10   -1.06    0.94
   0  -4  10    0.59    1.47
   0   4 -10   -0.16    0.49
   0   4 -10    0.36    1.08
   0  -4  11    5.99    2.07
   0   4  11    4.21    1.59
   0   4 -11    3.77    1.60
   0   4 -11    4.54    0.91
   0  -4 -11    3.25    1.54
   0  -4  12    7.33    2.28
   0   4  12    2.32    1.91
   0  -4 -12    1.28    1.94
   0   4 -12    4.84    1.62
   0   4 -12    3.15    0.97
   0  -4  13    9.09    3.08
   0   4  13    8.80    2.40
   0   4 -13   10.32    2.33
   0  -4 -13   15.99    2.59
   0   4 -13   10.94    1.47
   0   4  14    2.86    1.90
   0  -4  14    3.42    2.94
   0   4 -14    4.03    1.84
   0  -4 -14    1.67    2.07
   0   4  15    6.09    2.27
   0  -4  15    8.28    3.06
   0   4 -15    3.84    2.15
   0  -4 -15    4.06    2.06
   0   4  16    2.93    2.71
   0  -4  16    3.55    2.89
   0  -4 -16   -0.31    1.97
   0   4 -16    6.68    2.12
   0  -4  17    3.78    2.66
   0   4  17   -1.08    2.94
   0  -4 -17    5.63    2.90
   0   4 -17    4.47    2.27
   0  -4  18    0.68    3.20
   0   4  18    1.15    3.11
   0   4 -18    0.97    2.26
   0  -4 -18    4.42    2.81
   0   4  19    2.67    3.61
   0  -4  19    0.41    4.01
   0  -4 -19    8.53    3.60
   0   6   0  117.13    4.65
   0   6   0  121.64    4.31
   0  -6   0  123.82    3.62
   0   6   1   95.60    3.60
   0   6   1   97.98    3.94
   0  -6   1   95.23    2.73
   0  -6  -1   91.96    3.25
   0   6  -1   92.90    3.92
   0   6  -1   91.21    4.02
   0   6   2   39.80    1.93
   0  -6   2   38.78    1.33
   0   6   2   38.08    2.30
   0  -6   2   39.24    2.34
   0   6  -2   37.62    2.26
   0  -6  -2   39.08    2.03
   0  -6   3   29.38    2.13
   0   6   3   28.95    1.52
   0  -6   3   27.98    0.92
   0   6   3   30.99    2.18
   0   6  -3   30.40    2.29
   0  -6  -3   28.80    1.93
   0  -6   4    5.11    1.37
   0   6   4    5.76    0.75
   0   6   4    5.55    1.26
   0  -6  -4    4.27    1.05
   0   6  -4    3.20    1.28
   0   6   5   25.33    2.24
   0  -6   5   23.19    2.13
   0   6   5   25.40    1.27
   0   6  -5   24.03    2.03
   0  -6  -5   25.09    2.17
   0  -6   6   62.99    3.99
   0   6   6   58.17    3.61
   0  -6  -6   52.02    1.56
   0   6  -6   58.70    3.45
   0  -6  -6   53.73    3.23
   0  -6   7   76.95    4.97
   0   6   7   80.05    4.36
   0   6  -7   72.40    4.20
   0  -6  -7   81.05    4.48
   0  -6   8   26.83    3.35
   0   6   8   24.03    2.49
   0   6  -8   25.69    2.73
   0  -6  -8   22.11    2.32
   0  -6   9   13.85    3.05
   0   6   9   16.90    2.70
   0   6  -9   15.11    2.10
   0  -6  -9   19.53    2.54
   0  -6  10   -1.05    1.72
   0   6  10   -0.39    1.41
   0  -6 -10    2.52    1.09
   0   6 -10   -1.52    1.23
   0  -6  11    6.22    2.62
   0   6  11    4.72    1.78
   0   6 -11    8.06    2.12
   0  -6 -11    3.55    2.05
   0   6  12    7.23    2.16
   0  -6  12    7.83    2.90
   0  -6 -12    8.90    2.41
   0   6 -12    6.94    2.37
   0   6  13    9.46    2.57
   0  -6  13    9.73    3.08
   0  -6 -13   16.30    2.83
   0   6 -13   17.32    2.95
   0   6  14    8.02    2.85
   0  -6  14    0.24    2.73
   0  -6 -14    6.35    2.69
   0   6 -14   10.07    2.70
   0   6  15    0.56    2.22
   0  -6 -15    3.63    2.67
   0   6 -15   10.01    2.65
   0   6  16    4.80    2.40
   0  -6  16    2.28    3.64
   0   6 -16    4.55    2.55
   0  -6 -16    0.97    2.22
   0   6  17    0.74    1.94
   0  -6  17    1.80    2.18
   0   6 -17   -0.72    2.05
   0  -6 -17   -0.83    2.41
   0  -6  18    0.52    3.19
   0   6  18   -0.66    2.26
   0  -6 -18   -1.24    2.76
   0   6 -18   -1.14    2.38
   0   8   0  384.90   12.46
   0  -8   0  371.68    9.47
   0   8   0  359.66   11.37
   0   8   1   13.22    1.65
   0  -8   1   11.11    1.03
   0   8   1   15.89    2.00
   0   8  -1   14.69    1.62
   0   8  -1   13.57    1.73
   0  -8  -1   12.01    1.39
   0   8   2   90.47    4.13
   0  -8   2   93.22    4.98
   0  -8   2   92.97    3.03
   0   8   2   92.11    4.68
   0  -8  -2   89.65    4.15
   0   8  -2   86.14    4.51
   0   8   3    2.83    1.04
   0  -8   3    0.73    1.11
   0  -8   3    1.50    0.45
   0   8   3    0.26    0.83
   0  -8  -3    1.26    1.05
   0   8  -3    2.75    1.24
   0  -8   4    7.72    2.05
   0   8   4    8.11    1.76
   0   8   4    7.55    1.04
   0  -8  -4   11.03    1.66
   0   8  -4    8.94    1.94
   0  -8   5    0.21    1.70
   0   8   5   -0.08    1.41
   0   8   5    3.48    0.79
   0   8  -5    2.85    1.28
   0  -8  -5    3.02    1.34
   0   8   6   38.78    1.87
   0  -8   6   39.35    3.91
   0   8   6   41.82    3.51
   0  -8  -6   45.62    3.43
   0   8  -6   43.70    3.70
   0  -8   7    0.02    1.51
   0   8   7    1.20    1.53
   0   8  -7   -0.21    1.54
   0  -8  -7    4.75    1.51
   0  -8   8   41.24    4.45
   0   8   8   39.28    3.80
   0  -8  -8   37.45    3.35
   0   8  -8   37.39    3.85
   0  -8   9   -0.41    1.85
   0   8   9    2.52    1.65
   0   8  -9    0.78    1.33
   0  -8  -9    0.18    1.31
   0   8  10   28.67    3.62
   0  -8  10   24.89    4.00
   0   8 -10   25.08    3.61
   0  -8 -10   21.35    3.47
   0  -8  11    2.81    1.78
   0   8  11    0.19    1.50
   0   8 -11   -0.70    1.42
   0  -8 -11    0.77    1.46
   0  -8  12    8.37    2.91
   0   8 -12    2.33    2.25
   0  -8 -12    0.43    2.38
   0  -8  13    1.22    2.48
   0   8  13    0.08    2.10
   0   8 -13   -0.09    1.88
   0  -8 -13    1.24    2.03
   0   8  14   11.33    3.87
   0  -8  14   10.65    4.24
   0   8 -14   16.77    3.82
   0  -8 -14   18.96    3.85
   0   8  15    0.79    2.47
   0  -8  15    2.21    2.71
   0  -8 -15   -1.03    2.23
   0   8 -15    0.81    2.04
   0  -8  16    9.62    4.00
   0   8  16    2.23    2.79
   0   8 -16    1.60    2.54
   0  -8 -16    5.54    3.34
   0  10   0  102.58    5.95
   0  10   0  105.03    5.77
   0 -10   0  101.85    4.43
   0  10   1   33.96    3.67
   0  10   1   39.37    3.28
   0 -10   1   42.21    3.78
   0 -10   1   37.67    2.35
   0 -10  -1   40.79    2.73
   0  10  -1   42.95    3.69
   0  10   2   10.52    1.92
   0 -10   2   11.68    1.33
   0  10   2   11.99    2.34
   0 -10   2    9.48    2.01
   0 -10  -2    8.17    1.71
   0  10  -2   10.69    2.04
   0  10   3    2.12    1.08
   0  10   3   -0.74    1.05
   0 -10   3    0.25    1.51
   0 -10  -3    0.20    1.08
   0  10  -3   -0.12    1.42
   0 -10   4    0.04    1.35
   0  10   4    0.71    1.45
   0  10   4    0.41    1.03
   0 -10  -4    1.70    1.06
   0  10   5    2.69    1.19
   0 -10   5    0.04    1.96
   0  10  -5    4.10    1.81
   0  10   6   42.76    4.27
   0 -10   6   40.49    4.36
   0  10  -6   39.64    4.24
   0 -10  -6   44.60    4.06
   0  10   7   12.08    2.94
   0 -10   7   19.68    3.38
   0  10  -7   17.56    2.77
   0 -10  -7   15.28    2.60
   0  10   8   35.73    4.10
   0 -10   8   33.55    4.43
   0 -10  -8   28.03    3.93
   0  10  -8   32.07    3.66
   0 -10   9    0.86    2.93
   0  10   9    1.80    2.28
   0  10  -9    4.28    1.83
   0 -10  -9    4.73    2.31
   0  10  10    0.17    2.20
   0 -10  10    3.14    2.11
   0 -10 -10    1.41    1.72
   0  10 -10   -0.12    1.92
   0 -10  11    3.67    2.91
   0  10  11    3.20    2.31
   0 -10 -11   -0.06    1.77
   0  10 -11    1.46    2.28
   0  10  12    5.81    2.99
   0 -10  12    5.99    3.12
   0  10 -12    7.00    3.08
   0 -10 -12    3.49    2.81
   0  10  13   -2.46    2.59
   0 -10  13    0.46    2.90
   0 -10 -13    3.56    2.48
   0  10 -13    1.85    2.07
   0 -10  14   15.49    4.61
   0  10  14   11.12    4.05
   0 -10 -14    3.84    3.57
   0  10 -14    4.70    3.50
   0  12   0    8.31    2.50
   0 -12   0    9.49    2.73
   0  12   1   54.49    4.58
   0  12   1   54.82    5.27
   0 -12   1   49.89    5.19
   0  12  -1   51.32    4.90
   0 -12  -1   53.78    3.80
   0 -12   2    1.02    2.19
   0  12   2    4.10    1.83
   0  12   2    0.56    2.21
   0 -12  -2    3.22    1.58
   0  12  -2    0.60    1.67
   0  12   3    5.04    2.39
   0  12   3    2.04    1.66
   0 -12   3    5.98    2.49
   0  12  -3    5.88    2.45
   0 -12  -3    4.13    1.89
   0  12   4   -0.74    1.51
   0 -12   4   -1.20    1.73
   0  12   4    1.80    1.67
   0 -12  -4    1.68    1.55
   0  12  -4    5.19    2.02
   0 -12   5   14.06    3.59
   0  12   5   11.97    3.14
   0 -12  -5   16.80    3.00
   0  12  -5   17.12    3.56
   0 -12   6    6.75    2.64
   0  12   6    0.21    1.95
   0 -12  -6    9.26    2.46
   0  12  -6    1.50    2.13
   0  12   7   20.95    4.32
   0 -12   7   30.67    4.22
   0 -12  -7   29.92    4.39
   0  12  -7   30.13    4.53
   0 -12   8   -1.65    2.73
   0  12  -8    6.02    2.63
   0  12   9    7.13    3.19
   0 -12   9    5.91    3.68
   0  12  -9    5.09    3.17
   0 -12  -9    7.81    3.04
   0  12  10   -0.07    2.36
   0 -12 -10   -0.43    1.93
   0  12 -10    3.45    2.52
   0  12  11    0.08    1.95
   0 -12  11    2.34    2.40
   0  12 -11    1.79    2.46
   0 -12 -11   -0.50    1.93
   0 -14   0   10.30    3.20
   0  14   0   15.51    3.72
   0  14   1   16.63    4.00
   0 -14   1   22.15    3.80
   0  14  -1   24.65    4.15
   0 -14  -1   15.78    4.44
   0 -14   2   -0.70    2.38
   0  14   2    0.79    1.95
   0  14  -2    0.83    2.17
   0 -14   3    7.78    3.08
   0  14   3    1.50    2.82
   0  14  -3   -1.14    2.74
   0  14   4    1.21    2.10
   0 -14   4   -2.38    2.22
   0  14  -4    4.08    2.58
   0  14   5    8.27    3.44
   0 -14   5    6.08    3.61
   0  14  -5    8.30    3.79
   0  14   6    9.61    3.62
   0 -14   6   15.18    4.35
   0 -14  -6    7.73    3.18
   0  14  -6    5.37    3.21
   1  -1 -19    6.07    2.69
  -1  -1  19    0.03    2.25
  -1   1  19   -1.64    2.30
   1  -1 -18    5.76    2.69
   1   1 -18    1.30    2.55
  -1   1  18    4.38    3.10
   1   1 -17    5.83    2.53
   1  -1 -17    8.50    2.80
  -1  -1  17    2.79    2.94
  -1   1  17    5.47    3.04
   1   1 -16    6.32    1.70
   1   1 -16    6.09    2.43
   1  -1 -16    7.75    2.50
  -1  -1  16    6.50    3.29
  -1   1  16    4.54    2.97
   1   1 -15    5.93    2.23
   1   1 -15    7.39    1.67
   1  -1 -15    9.52    2.13
  -1  -1  15    6.83    3.20
  -1   1  15   11.26    3.11
   1   1 -14    5.34    2.03
   1   1 -14    6.37    1.50
   1  -1 -14    7.71    1.18
   1  -1 -14    8.46    2.20
  -1   1  14   10.47    2.81
  -1  -1  14    8.66    2.56
   1   1 -13    2.54    1.17
   1   1 -13    0.42    0.94
  -1   1  13    0.03    1.78
  -1  -1  13    0.68    1.65
   1   1 -12    0.37    0.93
   1  -1 -12   -0.45    1.36
   1  -1 -12    1.29    0.54
  -1  -1  12    0.49    1.84
  -1   1  12    7.12    1.86
   1   1 -11    7.78    1.34
   1  -1 -11    3.35    1.28
   1  -1 -11    4.85    0.71
   1   1 -11    5.65    1.17
  -1  -1  11    4.63    2.35
  -1   1  11    6.20    1.71
   1   1 -10   32.12    2.09
   1   1 -10   32.38    2.15
   1  -1 -10   31.76    2.57
   1  -1 -10   31.54    1.50
  -1  -1  10   28.86    3.47
  -1   1  10   35.08    3.29
   1  -1  -9    8.37    1.39
   1   1  -9   11.60    1.16
   1   1  -9    7.40    1.24
   1  -1  -9    9.46    0.74
  -1   1   9   11.43    1.84
  -1  -1   9   10.55    2.13
   1   1  -8  169.70    5.08
   1  -1  -8  163.25    5.53
   1   1  -8  167.53    5.20
   1  -1  -8  166.28    3.84
  -1   1   8  181.89    7.02
  -1  -1   8  160.76    6.74
   1   1  -7   69.83    2.66
   1   1  -7   68.29    2.61
   1  -1  -7   69.69    2.87
   1  -1  -7   70.92    1.89
  -1  -1   7   75.49    4.01
  -1   1   7   62.76    3.18
   1   1  -6   86.74    2.82
   1  -1  -6   78.63    2.96
   1  -1  -6   88.14    1.95
   1   1  -6   82.12    2.71
  -1  -1   6   87.16    4.00
  -1   1   6   82.34    3.37
   1   1  -5   13.61    0.90
   1   1  -5   12.36    0.89
   1  -1  -5   13.44    0.51
   1  -1  -5   12.01    1.15
  -1  -1   5   13.37    1.48
  -1   1   5   12.62    1.29
   1  -1  -4    1.14    0.16
   1  -1  -4    2.60    0.61
   1   1  -4    1.44    0.43
   1   1  -4    1.94    0.44
  -1   1   4    0.90    0.56
  -1   1   4    1.56    0.16
  -1  -1   4    2.88    0.72
   1   1  -3    1.27    0.36
   1  -1  -3    0.95    0.10
   1   1  -3    0.94    0.36
   1  -1  -3    1.84    0.34
  -1   1   3    1.02    0.51
  -1  -1   3    2.34    0.62
  -1  -1   3    0.94    0.27
  -1   1   3    0.96    0.09
   1   1  -2  116.98    1.94
   1  -1  -2  116.20    0.96
   1   1  -2  102.14    2.29
   1  -1  -2  115.19    2.38
   1   1  -2  118.63    2.37
   1  -1  -2  104.87    2.41
  -1   1   2  100.28    2.33
  -1  -1   2  119.99    2.49
  -1  -1   2  116.36    1.96
  -1   1   2  114.79    2.45
  -1  -1   2  107.52    2.35
   1   1   2   92.02    1.55
   1  -1   2   94.26    1.29
   1  -1   2   96.25    2.28
   1   1   2   98.07    2.21
   1   1   2   99.42    2.22
  -1  -1  -2   96.85    1.55
  -1   1  -2   92.56    1.32
  -1   1  -2   95.05    2.12
   1   1   3    8.69    0.68
   1   1   3    6.93    0.38
   1   1   3    6.89    0.83
   1  -1   3    8.21    0.89
  -1   1  -3    8.44    0.40
  -1  -1  -3    9.29    0.44
  -1   1  -3    8.12    0.66
  -1   1  -3    7.53    0.38
   1   1   4   -0.17    0.73
   1  -1   4    1.20    0.69
  -1  -1  -4    0.34    0.38
  -1   1  -4    1.54    0.46
  -1   1  -4    0.68    0.28
  -1  -1  -4    0.87    0.25
   1   1   5  151.01    4.92
   1  -1   5  152.39    4.81
  -1   1  -5  147.51    3.40
  -1   1  -5  152.53    4.05
  -1  -1  -5  153.95    3.03
  -1  -1  -5  148.50    4.21
   1   1   6  164.43    5.82
   1  -1   6  158.00    5.49
  -1   1  -6  165.73    4.05
  -1   1  -6  157.61    4.46
  -1  -1  -6  156.92    4.81
  -1  -1  -6  154.43    3.37
   1  -1   7   13.40    1.76
   1   1   7   14.37    1.86
  -1   1  -7   13.96    1.22
  -1   1  -7   12.76    1.03
  -1  -1  -7   12.30    0.79
  -1  -1  -7   15.52    1.34
   1  -1   8   60.91    3.80
   1   1   8   62.83    3.84
  -1  -1  -8   58.21    2.94
  -1   1  -8   58.20    2.63
  -1  -1  -8   60.28    2.09
  -1   1  -8   53.77    2.57
   1   1   9   13.63    2.24
   1  -1   9   10.81    2.20
  -1  -1  -9    8.69    0.81
  -1  -1  -9   10.52    1.27
  -1   1  -9    9.19    1.20
  -1   1  -9    8.53    1.19
   1   1  10    6.44    1.84
   1  -1  10    7.74    2.20
  -1  -1 -10    6.29    1.34
  -1  -1 -10    4.60    0.72
  -1   1 -10    4.19    1.09
  -1   1 -10    5.31    1.11
   1  -1  11   25.00    3.31
   1   1  11   25.90    3.05
  -1  -1 -11   18.34    2.33
  -1  -1 -11   21.48    1.46
  -1   1 -11   21.91    1.87
  -1   1 -11   22.14    1.99
   1   1  12   49.33    4.90
   1  -1  12   36.80    4.39
  -1  -1 -12   38.22    2.16
  -1   1 -12   36.04    2.90
  -1  -1 -12   42.20    3.50
  -1   1 -12   39.96    2.83
   1   1  13    2.59    1.97
   1  -1  13    1.94    2.21
  -1   1 -13    3.84    1.16
  -1   1 -13    3.01    1.33
  -1  -1 -13    0.43    0.72
  -1  -1 -13    0.44    1.21
   1  -1  14   18.68    3.86
   1   1  14   16.34    2.86
  -1  -1 -14   16.08    1.53
  -1  -1 -14   19.64    2.80
  -1   1 -14   15.56    2.14
  -1   1 -14   18.01    2.46
   1  -1  15    8.00    3.00
   1   1  15    4.18    2.24
  -1  -1 -15    4.20    2.09
  -1   1 -15    3.62    1.94
  -1   1 -15    3.05    1.51
   1  -1  16   -1.67    2.45
   1   1  16    5.26    2.25
  -1   1 -16    7.31    1.93
  -1   1 -16    1.32    1.41
  -1  -1 -16    0.24    2.04
   1  -1  17    6.77    3.32
  -1  -1 -17    1.49    2.48
   1   1  18   -1.64    2.24
   1  -1  18    0.90    2.54
  -1  -1 -18    0.37    1.83
   1   1  19    2.29    2.47
   1  -1  19   -0.89    2.91
  -1  -1 -19    0.89    2.60
   1  -3 -19   -1.11    2.40
  -1  -3  19    1.81    2.45
   1  -3 -18    3.34    2.84
  -1   3  18    1.41    2.84
  -1  -3  18    3.00    2.84
   1  -3 -17    7.12    2.85
   1   3 -17    2.90    2.18
  -1  -3  17    1.73    2.67
  -1   3  17    6.15    2.95
   1   3 -16    0.57    1.84
   1  -3 -16    6.36    2.16
   1   3 -16    4.79    1.93
  -1   3  16    5.24    2.35
  -1  -3  16    0.81    2.55
   1   3 -15    6.88    2.16
   1  -3 -15   10.36    2.77
   1   3 -15    7.49    2.18
  -1   3  15    6.85    3.05
  -1  -3  15   13.08    3.36
   1   3 -14    1.20    1.34
   1   3 -14    0.62    1.22
  -1  -3  14    0.36    2.11
  -1   3  14    1.32    1.63
   1   3 -13    1.06    1.04
   1  -3 -13   -0.16    1.19
  -1  -3  13    0.73    1.50
   1   3 -12    1.42    1.09
   1  -3 -12    2.80    1.61
   1   3 -12    2.05    1.33
  -1   3  12    0.59    1.45
  -1  -3  12    2.52    2.44
   1  -3 -11   22.65    2.32
   1   3 -11   23.61    2.32
   1   3 -11   24.37    1.98
  -1   3  11   19.59    3.10
  -1  -3  11   20.52    3.24
   1   3 -10   19.06    2.13
   1   3 -10   20.59    1.83
   1  -3 -10   19.56    2.25
  -1   3  10   16.20    2.18
  -1  -3  10   18.68    2.78
   1   3  -9   82.39    4.06
   1  -3  -9   80.77    4.26
   1   3  -9   87.81    3.35
  -1   3   9   77.15    4.28
  -1  -3   9   75.94    4.95
   1  -3  -8   16.64    1.88
   1   3  -8   15.60    1.65
   1   3  -8   15.18    1.10
  -1  -3   8   12.63    1.94
  -1   3   8   15.86    2.02
   1   3  -7   59.49    2.96
   1   3  -7   58.59    2.04
   1  -3  -7   60.25    3.22
  -1  -3   7   54.86    3.32
  -1   3   7   59.51    3.36
   1   3  -6    3.38    0.56
   1   3  -6    1.59    0.81
   1  -3  -6    2.63    0.78
  -1  -3   6    3.00    1.00
  -1   3   6    2.58    0.94
   1  -3  -5    5.89    0.82
   1   3  -5    6.27    0.98
   1   3  -5    5.91    0.51
  -1  -3   5    6.03    1.04
  -1   3   5    6.98    0.89
   1   3  -4    1.30    0.26
   1  -3  -4    1.23    0.53
   1  -3  -4    1.13    0.10
   1   3  -4    2.15    0.64
  -1   3   4    1.46    0.61
  -1  -3   4    2.24    0.68
   1   3  -3   56.90    1.23
   1  -3  -3   56.30    2.17
   1   3  -3   55.48    2.30
  -1   3   3   56.31    2.15
  -1   3   3   54.91    1.14
  -1  -3   3   55.45    2.13
   1   3  -2   24.07    0.75
   1   3  -2   25.36    1.37
   1  -3  -2   23.54    1.21
  -1  -3   2   21.01    0.75
  -1   3   2   24.25    0.84
  -1  -3   2   24.66    1.35
  -1   3   2   24.93    1.26
   1   3  -1  556.10    7.23
   1  -3  -1  549.23    8.39
   1   3  -1  549.90    9.22
   1   3  -1  545.09    9.64
  -1   3   1  560.15    8.27
  -1   3   1  543.24    9.72
   1   3   0  170.31    3.91
   1   3   0  162.63    3.72
   1   3   0  166.50    3.46
   1  -3   0  165.76    2.98
  -1   3   0  165.63    4.00
  -1   3   0  181.21    3.92
   1  -3   1  178.70    2.56
   1   3   1  197.77    3.98
   1   3   1  192.74    4.14
   1   3   1  195.80    4.31
   1  -3   1  195.23    2.63
  -1   3  -1  193.51    4.47
  -1   3  -1  183.23    4.37
   1  -3   2   30.87    0.42
   1   3   2   31.63    1.44
   1  -3   2   33.18    1.65
   1  -3   2   31.49    0.46
   1   3   2   37.15    1.24
   1   3   2   31.31    1.46
  -1   3  -2   33.80    1.59
   1  -3   3   -0.05    0.48
   1   3   3    0.10    0.48
   1   3   3   -0.07    0.45
  -1  -3  -3    0.65    0.21
  -1   3  -3   -0.37    0.52
   1  -3   4   23.20    1.75
   1   3   4   24.20    1.41
  -1  -3  -4   24.45    0.82
  -1  -3  -4   26.07    1.47
  -1   3  -4   25.07    1.47
   1   3   5  113.31    4.09
   1  -3   5  117.28    4.50
  -1  -3  -5  117.87    4.11
  -1   3  -5  120.55    4.23
  -1  -3  -5  116.88    2.19
  -1   3  -5  118.92    2.05
   1   3   6   55.95    2.77
   1  -3   6   55.00    3.12
  -1   3  -6   51.65    1.45
  -1  -3  -6   51.29    2.62
  -1  -3  -6   54.91    1.33
  -1   3  -6   55.65    2.75
   1  -3   7   84.67    4.51
   1   3   7   81.83    4.01
  -1   3  -7   83.40    3.73
  -1  -3  -7   87.44    1.96
  -1   3  -7   85.00    2.30
  -1  -3  -7   88.56    4.04
   1   3   8    9.56    1.67
   1  -3   8    7.93    1.69
  -1  -3  -8    7.79    1.21
  -1   3  -8    7.44    1.42
  -1   3  -8    8.03    0.76
  -1  -3  -8    5.82    0.47
   1  -3   9   17.44    2.76
   1   3   9   17.33    2.36
  -1  -3  -9   16.58    0.79
  -1   3  -9   19.68    1.81
  -1   3  -9   17.59    1.17
  -1  -3  -9   16.92    2.03
   1  -3  10    3.52    1.57
   1   3  10    0.68    1.26
  -1   3 -10    0.57    1.09
  -1  -3 -10    0.42    1.23
  -1  -3 -10    1.28    0.37
  -1   3 -10    2.16    0.67
   1   3  11   10.00    2.23
   1  -3  11    6.19    2.25
  -1   3 -11    6.05    1.06
  -1  -3 -11    6.62    1.87
  -1   3 -11    5.80    1.56
   1  -3  12    3.42    2.29
   1   3  12    3.32    2.11
  -1  -3 -12    5.97    1.64
  -1   3 -12    4.15    1.04
  -1   3 -12    4.98    1.69
   1   3  13   41.09    4.52
   1  -3  13   47.93    5.16
  -1  -3 -13   35.12    3.51
  -1   3 -13   36.75    2.76
  -1   3 -13   38.79    3.20
   1   3  14    3.05    2.49
   1  -3  14    2.29    2.13
  -1  -3 -14    7.63    1.87
  -1   3 -14    3.62    1.80
   1  -3  15   10.56    3.12
   1   3  15    5.88    3.10
  -1   3 -15   10.97    1.98
  -1   3 -15    5.02    2.26
  -1  -3 -15    7.45    2.13
   1  -3  16    5.04    2.23
   1   3  16    0.33    2.06
  -1  -3 -16   -0.33    2.15
  -1   3 -16    1.77    1.88
   1   3  17    0.02    2.13
   1  -3  17   -0.96    1.83
  -1  -3 -17   -0.80    1.95
  -1   3 -17    0.69    1.64
   1  -3  18    4.24    3.83
   1   3  18    2.78    3.25
  -1  -3 -18    6.00    3.11
   1   3  19    1.82    3.50
   1  -3  19    1.32    3.78
  -1  -3 -19    4.44    3.15
   1  -5 -18    2.96    2.64
   1   5 -18    1.39    2.09
  -1  -5  18   -0.89    2.31
  -1   5  18   -0.26    2.09
   1  -5 -17    2.88    2.47
   1   5 -17    0.69    2.29
  -1  -5  17    1.40    2.91
  -1   5  17    0.44    2.56
   1   5 -16    2.62    2.32
   1  -5 -16    1.51    2.08
  -1  -5  16    6.81    2.67
  -1   5  16    2.17    2.68
   1  -5 -15   17.86    3.83
   1   5 -15   21.59    3.31
  -1  -5  15   20.56    4.77
  -1   5  15   20.22    3.97
   1  -5 -14    5.01    2.26
   1   5 -14    2.03    1.91
  -1  -5  14    1.53    3.12
  -1   5  14    5.03    2.02
   1   5 -13   -0.31    1.00
  -1   5  13   -0.61    1.50
  -1  -5  13    0.91    1.43
   1   5 -12    3.05    1.29
   1  -5 -12    0.75    1.61
  -1   5  12   -0.03    1.45
  -1  -5  12    0.24    1.71
   1  -5 -11    2.08    1.32
   1   5 -11    0.64    1.06
  -1   5  11   -1.23    1.28
  -1  -5  11   -0.11    1.85
   1  -5 -10    3.07    1.20
   1   5 -10    3.10    1.35
   1   5 -10    0.53    0.53
  -1   5  10   -0.03    1.48
  -1  -5  10    0.41    1.65
   1   5  -9   65.73    2.17
   1  -5  -9   75.21    4.71
   1   5  -9   69.02    4.37
  -1  -5   9   75.55    5.28
  -1   5   9   73.06    4.58
   1   5  -8   20.67    0.94
   1  -5  -8   28.30    2.54
   1   5  -8   22.30    2.34
  -1  -5   8   20.34    2.56
  -1   5   8   23.05    2.43
   1  -5  -7  192.81    7.26
   1   5  -7  178.30    6.96
   1   5  -7  168.25    3.16
  -1   5   7  173.41    7.07
  -1  -5   7  180.38    7.58
   1   5  -6    3.55    0.33
   1  -5  -6    2.60    0.21
   1   5  -6    3.70    1.17
   1  -5  -6    2.13    0.92
  -1  -5   6    3.36    1.12
  -1   5   6    2.95    0.98
   1   5  -5    8.51    1.27
   1  -5  -5   10.98    1.26
   1   5  -5    8.88    0.43
  -1   5   5    9.18    1.42
  -1  -5   5   10.43    1.41
  -1   5   5    9.47    0.59
   1   5  -4    0.34    0.19
   1   5  -4    0.77    0.74
   1  -5  -4    0.45    0.56
  -1  -5   4    0.85    0.78
  -1   5   4   -0.54    0.57
   1   5  -3   17.44    1.44
   1   5  -3   19.34    0.78
   1  -5  -3   19.19    1.44
  -1  -5   3   15.24    1.57
  -1   5   3   18.74    0.97
  -1   5   3   16.61    1.37
   1   5  -2    6.58    1.06
   1   5  -2    7.35    0.53
   1  -5  -2    7.44    0.92
  -1   5   2    6.35    1.06
  -1   5   2    5.10    0.75
  -1  -5   2    8.19    1.09
   1   5  -1  943.50   18.53
   1  -5  -1  912.83   15.50
   1   5  -1  943.65   14.07
   1   5  -1  948.91   18.26
  -1   5   1  946.73   16.52
  -1   5   1  917.20   18.44
   1  -5   0  116.90    3.04
   1   5   0  117.07    3.90
   1   5   0  113.08    3.26
   1   5   0  109.16    3.75
  -1   5   0  113.07    3.83
  -1   5   0  111.67    3.94
   1   5   1  424.10    9.96
   1   5   1  400.31    8.74
   1   5   1  407.21    9.13
   1  -5   1  412.97    6.67
  -1   5  -1  403.51   10.21
  -1   5  -1  401.56    9.75
   1  -5   2   17.26    0.64
   1   5   2   18.04    1.13
   1  -5   2   18.01    1.44
   1   5   2   19.35    1.38
   1   5   2   17.84    1.43
  -1   5  -2   17.49    1.39
   1  -5   3   17.05    0.42
   1   5   3   18.83    1.37
   1   5   3   19.79    1.18
   1  -5   3   15.99    1.49
  -1   5  -3   19.98    1.50
  -1  -5  -3   18.15    1.54
   1   5   4   45.76    1.74
   1  -5   4   46.11    2.65
   1   5   4   50.46    2.78
  -1  -5  -4   54.87    2.79
  -1   5  -4   49.54    2.69
   1  -5   5  497.09   13.81
   1   5   5  510.60   13.39
  -1  -5  -5  509.50    8.27
  -1   5  -5  499.79   13.74
  -1  -5  -5  528.07   13.73
   1   5   6   35.13    2.55
   1  -5   6   35.45    2.85
  -1  -5  -6   35.61    1.21
  -1  -5  -6   32.99    2.29
  -1   5  -6   32.99    2.42
   1   5   7   45.88    3.24
   1  -5   7   47.70    3.29
  -1   5  -7   47.93    3.30
  -1  -5  -7   50.51    1.39
  -1  -5  -7   48.48    2.99
   1  -5   8   -0.85    1.44
   1   5   8    0.45    1.06
  -1   5  -8   -0.78    1.04
   1  -5   9   -0.05    1.40
   1   5   9   -1.34    1.29
  -1   5  -9   -1.22    1.19
  -1  -5  -9    4.51    1.23
   1   5  10   -0.38    1.52
   1  -5  10    2.58    2.06
  -1  -5 -10    1.64    1.16
  -1   5 -10    1.32    1.35
   1  -5  11   24.21    3.93
   1   5  11   22.14    3.28
  -1  -5 -11   24.24    2.77
  -1   5 -11   25.02    2.93
   1  -5  12    7.83    2.80
   1   5  12    7.30    2.57
  -1  -5 -12    7.04    2.02
  -1   5 -12    8.28    2.17
   1  -5  13   38.49    5.26
   1   5  13   41.01    4.22
  -1   5 -13   38.68    4.12
  -1  -5 -13   40.02    4.04
   1   5  14    1.90    1.79
   1  -5  14   -2.41    1.92
  -1   5 -14   -0.33    1.56
   1   5  15    6.27    2.93
  -1  -5 -15    5.68    2.65
  -1   5 -15    6.45    2.52
   1  -5  16   -2.17    1.97
   1   5  16    1.78    2.16
  -1   5 -16    0.96    1.81
  -1  -5 -16   -1.10    1.85
   1   5  17   -1.64    2.54
   1  -5  17    0.45    3.12
  -1  -5 -17    1.63    2.76
  -1   5 -17    7.94    2.43
   1   5  18   -0.71    2.81
  -1   5 -18   -0.41    2.47
  -1  -5 -18    4.80    2.77
   1  -7 -17    3.02    2.52
   1   7 -17    1.81    2.43
  -1   7  17    1.06    3.07
  -1  -7  17    5.23    3.10
   1   7 -16    2.72    2.45
   1  -7 -16   -0.04    2.59
  -1  -7  16    6.33    3.16
  -1   7  16   -1.26    2.06
   1   7 -15    5.94    2.85
   1  -7 -15    1.48    2.37
  -1   7  15    7.48    2.90
   1   7 -14    2.59    2.40
   1  -7 -14    3.28    2.48
  -1   7  14    3.68    2.25
  -1  -7  14    3.56    3.04
   1  -7 -13    3.98    1.74
   1   7 -13    3.14    1.99
  -1  -7  13   -0.09    2.64
  -1   7  13    0.81    1.81
   1  -7 -12    4.61    2.06
   1   7 -12    0.47    1.96
  -1  -7  12    4.10    2.57
  -1   7  12    1.91    1.76
   1   7 -11    0.16    1.49
  -1   7  11   -0.79    1.47
  -1  -7  11    1.44    1.52
   1   7 -10    5.68    1.72
   1  -7 -10    7.29    1.84
  -1   7  10    3.66    1.78
  -1  -7  10    3.19    2.63
   1   7  -9    9.63    2.32
   1  -7  -9   12.16    2.15
  -1   7   9   10.21    2.44
  -1  -7   9   17.60    3.01
   1   7  -8   66.53    4.64
   1  -7  -8   65.96    4.48
  -1  -7   8   70.52    4.92
  -1   7   8   67.38    4.75
   1  -7  -7   49.33    3.51
   1   7  -7   46.84    3.65
  -1  -7   7   47.44    4.07
  -1   7   7   53.02    3.92
   1   7  -6   44.43    3.29
   1  -7  -6   54.09    3.39
  -1   7   6   46.76    1.83
  -1  -7   6   55.38    4.01
  -1   7   6   51.16    3.40
   1   7  -5    5.79    1.64
   1  -7  -5    4.60    1.49
  -1   7   5    6.52    0.85
  -1   7   5    7.23    1.61
  -1  -7   5   12.08    1.82
   1  -7  -4    7.69    1.33
   1   7  -4    4.89    1.44
   1   7  -4    4.90    0.46
  -1   7   4    5.72    0.77
  -1   7   4    5.61    1.45
  -1  -7   4    5.37    1.62
   1   7  -3    6.67    1.49
   1   7  -3    6.71    0.57
   1  -7  -3    5.02    1.22
  -1  -7   3    7.01    1.55
  -1   7   3    9.33    1.03
  -1   7   3    8.75    1.31
   1   7  -2  100.27    3.04
   1  -7  -2  104.69    4.11
   1   7  -2   98.53    4.70
  -1  -7   2  110.56    4.67
  -1   7   2   98.75    4.71
  -1   7   2   97.65    3.87
   1   7  -1   49.56    2.94
   1   7  -1   48.92    3.00
   1  -7  -1   46.95    2.29
  -1   7   1   42.80    2.51
  -1   7   1   49.10    3.05
   1   7   0  121.05    5.03
   1   7   0  131.27    5.22
   1  -7   0  125.39    3.92
  -1   7   0  121.85    5.38
  -1   7   0  120.78    4.90
  -1  -7   0  123.98    4.18
   1  -7   1   33.28    1.53
   1   7   1   30.73    2.20
   1   7   1   35.39    2.46
  -1   7  -1   33.59    2.43
  -1   7  -1   37.08    2.48
  -1  -7  -1   32.46    1.94
   1  -7   2   13.26    0.78
   1  -7   2   15.62    1.69
   1   7   2   15.48    1.49
   1   7   2   13.58    1.71
  -1   7  -2   14.65    1.58
  -1  -7  -2   16.82    1.56
   1   7   3   -0.73    0.58
   1  -7   3    0.15    0.78
   1  -7   3    0.19    0.21
  -1  -7  -3    0.18    0.59
  -1   7  -3   -0.34    0.70
   1   7   4   15.23    1.33
   1   7   4   13.64    1.88
   1  -7   4   18.07    2.03
  -1  -7  -4   14.31    1.75
  -1   7  -4   12.35    1.95
   1   7   5   57.96    2.37
   1   7   5   56.52    3.62
   1  -7   5   52.21    3.80
  -1  -7  -5   53.53    3.31
  -1   7  -5   57.15    3.60
   1  -7   6   56.77    4.33
   1   7   6   55.63    3.80
  -1  -7  -6   53.35    3.69
  -1  -7  -6   52.97    2.09
  -1   7  -6   58.19    3.75
   1   7   7   13.20    2.17
   1  -7   7   13.77    2.68
  -1   7  -7   18.03    2.15
  -1  -7  -7   15.57    2.22
  -1  -7  -7   12.27    0.86
   1  -7   8   18.24    2.85
   1   7   8   23.48    2.86
  -1  -7  -8   20.15    2.36
  -1   7  -8   19.24    2.65
   1  -7   9    4.71    2.39
   1   7   9    3.48    1.55
  -1  -7  -9    5.75    1.76
  -1   7  -9    3.14    1.62
   1  -7  10    3.08    2.14
   1   7  10    3.15    1.91
  -1   7 -10    3.85    1.61
  -1  -7 -10    5.50    1.94
   1   7  11   12.57    2.36
   1  -7  11    9.07    2.71
  -1  -7 -11    9.69    2.30
  -1   7 -11   12.55    2.75
   1   7  12   15.51    2.97
   1  -7  12   21.98    4.07
  -1  -7 -12   21.10    3.37
  -1   7 -12   14.89    3.36
   1   7  13    7.00    2.95
   1  -7  13    8.93    3.45
  -1  -7 -13    7.65    2.93
  -1   7 -13    5.92    2.30
   1  -7  14    8.18    3.35
   1   7  14    5.74    2.36
  -1   7 -14    3.20    2.27
  -1  -7 -14    3.17    2.37
   1   7  15    0.62    2.27
  -1   7 -15   -0.37    2.09
  -1  -7 -15   -1.06    1.68
   1  -7  16    4.01    3.20
   1   7  16   -1.54    3.01
  -1  -7 -16    0.82    2.84
  -1   7 -16    5.28    2.19
   1  -7  17    2.23    3.59
   1   7  17   -0.18    2.45
  -1   7 -17    1.41    2.65
  -1  -7 -17    2.33    2.77
   1  -9 -15    3.49    2.96
   1   9 -15    0.90    2.98
  -1   9  15    3.15    3.25
  -1  -9  15    4.98    3.53
   1   9 -14    3.88    3.19
   1  -9 -14    8.51    3.32
  -1   9  14    8.41    3.60
  -1  -9  14    8.91    3.95
   1   9 -13   -0.60    1.89
   1  -9 -13   -1.37    1.81
  -1   9  13   -1.07    2.34
  -1  -9  13   -2.32    2.74
   1   9 -12    2.83    2.05
   1  -9 -12   -0.04    1.67
  -1   9  12    3.56    2.23
  -1  -9  12   -1.53    2.02
   1   9 -11   -0.49    1.22
   1  -9 -11    0.09    1.42
  -1   9  11    0.89    1.62
   1  -9 -10   10.10    2.65
   1   9 -10   10.07    2.70
  -1   9  10    6.68    2.20
  -1  -9  10    6.72    2.73
   1   9  -9    3.80    2.30
   1  -9  -9    7.58    2.48
  -1  -9   9    5.19    2.20
  -1   9   9    8.43    2.43
   1  -9  -8   49.08    4.17
   1   9  -8   52.67    4.32
  -1   9   8   42.64    4.49
  -1  -9   8   48.08    4.28
   1  -9  -7    6.54    1.81
   1   9  -7    6.21    2.09
  -1   9   7    5.81    2.12
  -1  -9   7    4.10    1.97
   1   9  -6   48.57    4.18
   1  -9  -6   47.10    4.06
  -1   9   6   48.53    2.54
  -1   9   6   46.62    4.02
  -1  -9   6   47.62    4.57
   1   9  -5    1.53    1.72
   1  -9  -5    3.28    1.33
  -1   9   5    1.80    0.85
  -1   9   5    4.02    1.66
  -1  -9   5    3.44    1.49
   1   9  -4    6.24    1.88
   1  -9  -4    5.44    1.66
  -1   9   4    3.33    1.43
  -1   9   4    4.05    1.03
  -1  -9   4    7.82    1.69
   1   9  -3   -0.13    1.27
  -1  -9   3    0.69    0.44
  -1  -9   3    1.62    1.36
  -1   9   3    0.03    0.83
   1   9  -2   34.99    3.12
   1  -9  -2   35.89    2.60
  -1   9   2   34.19    3.30
  -1  -9   2   31.18    1.78
  -1   9   2   33.22    2.67
  -1  -9   2   40.63    3.17
   1  -9  -1   29.12    2.14
   1   9  -1   22.80    2.71
  -1  -9   1   27.57    1.85
  -1   9   1   29.31    2.99
  -1  -9   1   28.75    2.67
  -1   9   1   23.99    2.48
   1  -9   0  152.24    5.37
   1   9   0  152.14    6.98
   1   9   0  152.34    6.84
  -1   9   0  147.01    6.60
  -1  -9   0  142.93    5.41
  -1   9   0  140.27    6.85
   1   9   1    0.99    1.16
   1  -9   1    3.72    1.18
   1  -9   1    0.85    0.59
   1   9   1    1.83    1.05
  -1  -9  -1    0.14    0.91
  -1   9  -1   -0.40    1.11
   1  -9   2   29.96    2.85
   1   9   2   27.37    2.38
   1  -9   2   26.55    1.58
   1   9   2   26.65    2.56
  -1   9  -2   30.22    2.59
  -1  -9  -2   29.05    2.32
   1   9   3    3.52    1.25
   1   9   3    4.99    1.66
   1  -9   3    8.13    1.73
  -1   9  -3    2.68    1.38
  -1  -9  -3    5.03    1.42
   1   9   4   58.67    4.38
   1  -9   4   56.05    4.70
   1   9   4   62.31    3.66
  -1   9  -4   54.82    4.03
  -1  -9  -4   62.96    3.96
   1   9   5   21.15    2.55
   1  -9   5   20.86    2.94
   1   9   5   12.78    1.56
  -1  -9  -5   18.76    2.40
  -1   9  -5   17.86    2.83
   1  -9   6   53.34    4.26
   1   9   6   51.68    4.15
  -1   9  -6   59.69    4.84
  -1  -9  -6   55.01    4.26
   1  -9   7    6.48    2.43
   1   9   7    4.76    2.07
  -1   9  -7    6.08    1.83
  -1  -9  -7    6.27    2.11
   1   9   8   15.43    2.77
   1  -9   8   17.26    3.18
  -1   9  -8   12.52    2.96
  -1  -9  -8   15.15    2.77
   1   9   9   11.79    2.59
   1  -9   9    7.98    3.19
  -1  -9  -9    6.11    2.10
  -1   9  -9   10.69    2.84
   1  -9  10    4.68    2.59
   1   9  10    8.59    2.72
  -1  -9 -10    4.20    2.48
  -1   9 -10    7.74    2.22
   1  -9  11    6.60    3.01
   1   9  11    2.52    2.43
  -1  -9 -11    1.63    1.95
  -1   9 -11    2.08    2.33
   1   9  12   20.48    3.27
   1  -9  12   16.78    3.69
  -1  -9 -12   11.06    3.69
  -1   9 -12    9.75    3.61
   1  -9  13    7.64    3.45
   1   9  13    1.63    2.95
  -1   9 -13    3.23    2.68
  -1  -9 -13    2.51    2.35
   1  -9  14    1.21    3.56
   1   9  14    1.97    3.38
  -1  -9 -14    9.46    2.95
  -1   9 -14    2.19    3.01
   1  -9  15   -0.85    2.98
   1   9  15   -0.65    2.78
  -1   9 -15   -2.00    2.46
  -1  -9 -15   -0.03    2.05
   1  11 -13    1.01    2.94
   1 -11 -13    0.87    2.87
  -1 -11  13    0.63    3.45
  -1  11  13    3.98    2.40
   1 -11 -12    7.26    2.81
   1  11 -12   -1.47    2.65
  -1 -11  12    2.88    3.32
  -1  11  12    0.63    2.83
   1 -11 -11    0.57    2.40
   1  11 -11    2.45    2.29
  -1 -11  11    0.10    2.39
  -1  11  11    1.77    1.95
   1 -11 -10    5.20    2.71
   1  11 -10    4.88    2.36
  -1 -11  10    8.01    3.24
  -1  11  10    2.25    2.28
   1  11  -9   11.99    3.07
   1 -11  -9   23.24    3.67
  -1 -11   9   19.02    3.63
  -1  11   9   17.83    3.12
   1  11  -8    6.81    2.61
   1 -11  -8    8.93    2.43
  -1 -11   8    8.68    3.19
  -1  11   8   15.37    3.16
   1  11  -7   26.62    4.01
   1 -11  -7   22.54    3.54
  -1  11   7   20.85    3.74
  -1 -11   7   31.57    4.22
   1 -11  -6   14.55    2.41
   1  11  -6    9.25    2.58
  -1 -11   6   13.33    3.18
  -1  11   6   16.02    2.99
   1  11  -5    6.97    2.67
   1 -11  -5    7.38    2.20
  -1 -11   5    8.89    2.69
  -1  11   5    7.47    2.51
   1 -11  -4   -0.12    1.45
   1  11  -4   -0.43    1.77
  -1  11   4    0.58    1.10
  -1 -11   4    5.20    1.99
  -1  11   4    1.08    1.38
   1 -11  -3   16.52    2.37
   1  11  -3   15.56    3.02
  -1  11   3   17.86    3.01
  -1 -11   3   17.82    3.17
  -1  11   3   16.44    2.27
   1 -11  -2   28.48    2.66
   1  11  -2   29.24    3.57
  -1  11   2   33.06    3.13
  -1  11   2   24.66    3.23
  -1 -11   2   29.34    3.72
   1 -11  -1  107.29    5.15
   1  11  -1  112.71    6.78
  -1 -11   1  124.01    6.94
  -1  11   1  106.24    6.28
  -1  11   1  115.79    6.83
  -1 -11   1  112.13    4.76
   1  11   0   35.62    3.63
   1 -11   0   40.29    2.57
   1  11   0   28.20    2.85
  -1 -11   0   39.94    2.68
  -1  11   0   25.91    2.81
  -1  11   0   42.68    3.76
   1  11   1   27.26    3.25
   1  11   1   28.85    3.10
   1 -11   1   28.11    3.29
  -1 -11  -1   29.09    2.68
  -1  11  -1   27.98    3.39
   1  11   2    0.80    1.59
   1 -11   2    3.34    1.64
   1  11   2    3.17    1.66
  -1  11  -2    4.15    1.84
  -1 -11  -2    2.49    1.47
   1  11   3    5.18    2.02
   1  11   3    3.52    1.78
   1 -11   3    4.23    1.99
  -1  11  -3    4.12    2.15
  -1 -11  -3    6.80    1.85
   1  11   4   18.06    2.94
   1 -11   4   19.24    3.37
   1  11   4   15.91    2.55
  -1  11  -4   15.28    3.04
  -1 -11  -4   14.53    2.73
   1  11   5   38.52    3.05
   1 -11   5   41.74    4.50
   1  11   5   43.60    4.33
  -1 -11  -5   41.94    4.08
  -1  11  -5   41.09    4.18
   1  11   6   15.09    2.79
   1 -11   6   14.91    2.86
  -1  11  -6   17.38    3.34
  -1 -11  -6   23.14    3.19
   1 -11   7   23.70    3.46
   1  11   7   21.30    3.67
  -1 -11  -7   21.79    3.55
  -1  11  -7   17.99    3.80
   1  11   8    6.87    2.61
   1 -11   8    2.53    3.17
  -1  11  -8    7.22    2.66
  -1 -11  -8    6.28    2.76
   1 -11   9   -1.24    2.76
   1  11   9    5.78    2.41
  -1  11  -9    2.74    2.48
  -1 -11  -9    1.00    2.52
   1  11  10    0.90    2.75
   1 -11  10    2.42    2.58
  -1 -11 -10    6.75    2.90
  -1  11 -10    4.64    2.77
   1 -11  11    8.60    3.79
   1  11  11    2.45    3.20
  -1  11 -11    6.69    2.47
  -1 -11 -11    9.44    3.42
   1  11  12    2.14    2.53
   1 -11  12    2.80    3.55
  -1 -11 -12    1.99    2.46
  -1  11 -12    3.76    2.93
   1  11  13    8.88    3.94
   1 -11  13    7.03    4.38
  -1 -11 -13    9.52    3.89
  -1  11 -13    6.40    3.70
   1  13  -9    8.05    4.51
   1 -13  -9   18.72    4.31
  -1  13   9   20.84    4.37
  -1 -13   9   16.84    4.80
   1 -13  -8   -0.85    2.52
   1  13  -8   -0.34    2.79
  -1  13   8    5.81    2.60
  -1 -13   8    0.82    2.49
   1 -13  -7    9.32    3.11
   1  13  -7    9.54    3.58
  -1  13   7   11.21    2.95
  -1 -13   7   -1.50    3.58
   1  13  -6   -0.48    2.74
   1 -13  -6    7.13    2.21
  -1  13   6   -2.25    2.44
  -1 -13   6   -0.64    2.80
   1 -13  -5    0.38    1.72
   1  13  -5    2.20    1.63
  -1  13   5   -0.13    1.97
  -1 -13   5   -2.32    2.22
   1  13  -4   -0.19    1.54
   1 -13  -4    0.60    1.70
  -1 -13   4    1.75    2.24
   1 -13  -3    5.98    2.30
   1  13  -3   10.58    3.02
  -1  13   3    5.19    2.44
  -1 -13   3    6.97    2.95
   1  13  -2    3.29    2.23
  -1 -13   2    1.76    1.91
  -1  13   2   -0.58    2.29
  -1  13   2    1.02    1.61
   1  13  -1   31.83    4.25
  -1  13   1   35.60    4.15
  -1 -13   1   29.72    4.67
   1  13   0    5.38    2.25
   1 -13   0    0.64    1.90
  -1 -13   0    0.82    1.90
  -1  13   0    0.96    2.08
   1  13   1   22.90    3.77
   1 -13   1   23.70    4.13
  -1  13  -1   16.92    3.65
   1  13   2   -0.10    1.99
   1  13   2   -0.66    1.55
   1 -13   2    0.06    2.01
  -1  13  -2    4.40    1.94
  -1 -13  -2   -0.80    1.50
   1  13   3   -1.38    1.75
   1 -13   3    2.03    2.30
  -1 -13  -3   -0.97    1.61
  -1  13  -3    4.23    1.78
   1  13   4   -0.64    1.67
   1 -13   4   -0.11    2.42
  -1 -13  -4    5.01    1.91
  -1  13  -4   -0.73    1.80
   1  13   5   19.88    3.63
   1 -13   5   22.84    4.34
  -1 -13  -5   17.22    3.85
  -1  13  -5   20.57    4.18
   1  13   6    7.81    2.91
   1 -13   6   -0.55    3.31
  -1  13  -6    7.70    3.07
  -1 -13  -6    2.76    2.70
   1  13   7   15.67    4.10
   1 -13   7   14.88    4.40
  -1  13  -7   17.00    4.37
  -1 -13  -7   21.33    3.46
   1  13   8   -2.48    2.27
   1 -13   8    1.94    2.76
  -1  13  -8   -0.77    2.02
   1  13   9    6.75    2.87
   1 -13   9   -0.36    3.32
  -1  13  -9    0.51    2.42
  -1 -13  -9   -0.25    2.84
  -2   0  20   -0.13    2.00
   2   0 -19    7.75    3.33
  -2   0  18    1.84    2.83
   2   0 -17   -0.60    2.00
  -2   0  17   -0.93    1.92
   2   0 -16   11.57    2.73
  -2   0  16    7.01    3.35
   2   0 -15    2.86    0.96
   2   0 -15    0.79    1.80
  -2   0  15    0.36    2.13
   2   0 -14    8.02    1.23
   2   0 -14    7.72    2.31
  -2   0  14   13.10    2.65
   2   0 -13    1.46    1.34
   2   0 -13    0.96    0.69
  -2   0  13   -1.45    2.02
   2   0 -12    6.26    0.97
   2   0 -12    8.03    1.86
  -2   0  12    9.62    2.74
   2   0 -11   -0.14    0.48
  -2   0  11    0.20    1.42
   2   0 -10  211.27    7.64
   2   0 -10  212.06    5.91
  -2   0  10  224.59    9.63
   2   0  -9   -0.52    0.41
  -2   0   9    3.37    1.08
   2   0  -8   38.69    1.68
   2   0  -8   32.79    2.18
  -2   0   8   38.36    2.96
   2   0  -7    0.35    0.51
   2   0  -7   -0.07    0.29
  -2   0   7   -0.16    0.77
   2   0  -6   41.09    2.03
   2   0  -6   43.50    1.55
  -2   0   6   41.66    2.53
   2   0  -5    0.11    0.28
   2   0  -5    2.58    0.59
   2   0  -4  126.10    3.36
   2   0  -4  129.18    2.64
  -2   0   4  131.09    3.89
   2   0  -3    0.35    0.39
  -2   0   3    0.34    0.20
  -2   0   3    0.22    0.42
   2   0  -2 1479.24   16.25
   2   0  -2 1471.77   13.66
  -2   0   2 1453.89   15.22
  -2   0   2 1428.50   14.61
  -2   0   2 1426.06   17.43
   2   0   2    1.03    0.44
   2   0   2    0.71    0.28
  -2   0  -2    0.52    0.29
   2   0   3    0.92    0.38
   2   0   3    1.20    0.75
  -2   0  -3    1.48    0.46
   2   0   4 2560.15   36.81
   2   0   4 2665.13   30.95
  -2   0  -4 2625.14   30.37
   2   0   5    0.30    0.37
   2   0   5    1.51    0.73
  -2   0  -5   -0.48    0.38
   2   0   6  397.42   10.55
  -2   0  -6  400.09    8.23
  -2   0  -6  388.77    8.81
   2   0   7   -0.46    0.89
  -2   0  -7    0.96    0.53
  -2   0  -7   -0.34    0.45
   2   0   8   31.35    2.80
  -2   0  -8   27.69    1.71
  -2   0  -8   27.16    1.86
   2   0   9   -0.81    1.00
  -2   0  -9    0.70    0.60
  -2   0  -9    0.08    0.71
   2   0  10   43.50    3.64
  -2   0 -10   44.30    2.38
  -2   0 -10   44.46    2.82
   2   0  11    0.10    1.71
  -2   0 -11    0.96    0.93
  -2   0 -11   -0.29    0.71
   2   0  12   86.30    6.14
  -2   0 -12   85.65    4.94
  -2   0 -12   81.13    4.00
   2   0  13    2.32    1.93
  -2   0 -13    0.20    1.22
  -2   0 -13    0.03    0.89
   2   0  14    5.95    2.13
  -2   0 -14    4.11    1.58
  -2   0 -14    0.68    1.22
   2   0  15    2.27    2.73
  -2   0 -15    3.60    1.65
  -2   0 -15    0.34    1.23
   2   0  16    1.82    2.27
  -2   0 -16    0.88    1.82
  -2   0 -17    3.38    2.25
   2   0  18   -1.77    2.79
  -2   0 -18   -0.58    2.20
   2   0  19    0.44    2.79
   2  -2 -19    3.80    3.11
  -2  -2  19    3.87    3.12
  -2   2  19    1.25    3.30
   2  -2 -18    6.92    3.41
  -2  -2  18   10.01    4.07
  -2   2  18    5.87    3.62
   2   2 -17    1.21    1.40
   2   2 -17    2.13    2.20
   2  -2 -17    0.35    2.34
  -2  -2  17    1.02    2.92
  -2   2  17    6.50    2.75
   2   2 -16    9.38    1.97
   2  -2 -16   11.38    3.26
   2   2 -16   11.82    2.88
  -2  -2  16   17.75    4.20
  -2   2  16   15.70    3.04
   2   2 -15    4.22    1.66
   2  -2 -15    8.59    2.36
   2   2 -15    4.12    2.18
  -2  -2  15    4.84    2.53
  -2   2  15    6.26    2.60
   2   2 -14   -0.22    1.14
   2  -2 -14    0.15    1.60
   2   2 -14    0.11    1.46
  -2   2  14    4.33    1.74
   2   2 -13    0.20    1.11
   2  -2 -13   -1.42    1.56
  -2  -2  13    4.33    1.76
  -2   2  13    4.05    1.83
   2   2 -12    8.49    1.79
   2  -2 -12    5.53    2.14
   2   2 -12    7.87    1.35
  -2   2  12    5.96    2.02
  -2  -2  12    8.27    2.26
   2  -2 -11    8.97    0.71
   2   2 -11   11.54    1.90
   2   2 -11    8.92    1.46
   2  -2 -11   12.34    1.76
  -2  -2  11    9.72    2.68
  -2   2  11   12.93    2.02
   2  -2 -10   45.05    2.93
   2   2 -10   42.92    2.65
   2   2 -10   48.50    3.01
   2  -2 -10   39.93    1.37
  -2   2  10   44.28    3.21
  -2  -2  10   40.58    3.80
   2   2  -9   55.50    2.87
   2  -2  -9   60.42    3.27
   2   2  -9   60.23    3.06
   2  -2  -9   52.65    1.46
  -2   2   9   53.85    3.61
  -2  -2   9   62.69    3.90
   2   2  -8   76.97    3.19
   2   2  -8   68.73    3.15
   2  -2  -8   73.81    3.64
   2  -2  -8   73.92    1.62
  -2  -2   8   76.62    4.22
  -2   2   8   78.06    4.12
   2  -2  -7   44.87    2.38
   2  -2  -7   43.46    0.94
   2   2  -7   47.91    2.30
   2   2  -7   48.83    2.18
  -2  -2   7   50.44    2.86
  -2   2   7   48.90    2.97
   2   2  -6   72.24    2.47
   2   2  -6   68.83    2.73
   2  -2  -6   69.27    2.92
  -2  -2   6   68.06    3.10
  -2   2   6   70.20    3.26
  -2   2   6   65.11    0.99
   2   2  -5    0.38    0.51
   2   2  -5    0.37    0.44
   2  -2  -5    0.88    0.51
  -2   2   5    1.59    0.69
  -2  -2   5    2.78    0.85
   2   2  -4   13.06    0.79
   2   2  -4   12.17    1.02
   2  -2  -4   13.58    1.12
  -2   2   4   13.02    0.98
  -2  -2   4   14.74    1.28
  -2   2   4   11.89    0.28
   2  -2  -3   30.11    1.48
   2  -2  -3   26.80    0.61
   2   2  -3   29.35    1.32
   2   2  -3   28.87    1.10
  -2   2   3   28.26    1.41
  -2   2   3   27.55    0.61
  -2  -2   3   29.66    1.34
   2  -2  -2  130.51    3.17
   2  -2  -2  119.52    2.12
   2   2  -2  125.83    2.58
   2   2  -2  126.59    3.24
  -2   2   2  126.66    3.17
  -2  -2   2  127.03    2.83
  -2   2   2  126.63    2.05
   2  -2  -1   49.95    1.34
   2   2  -1   55.37    1.48
   2   2  -1   59.14    1.82
   2  -2  -1   56.87    1.66
  -2  -2   1   58.06    1.42
  -2   2   1   54.42    1.37
  -2   2   1   55.96    1.65
   2   2   0    8.40    0.60
   2  -2   0    7.03    0.47
   2   2   0    6.47    0.57
   2   2   0    6.53    0.40
  -2  -2   0    6.02    0.37
  -2   2   0    5.28    0.39
  -2   2   0    6.57    0.59
  -2   2   0    6.36    0.56
   2   2   1   10.39    0.66
   2  -2   1    9.76    0.73
   2  -2   1    9.30    0.42
   2   2   1    8.83    0.55
  -2   2  -1   11.77    0.80
  -2   2  -1    8.66    0.43
   2   2   2   18.29    0.93
   2   2   2   19.71    1.01
   2  -2   2   19.69    0.49
   2  -2   2   19.06    1.08
  -2   2  -2   19.08    1.06
  -2  -2  -2   18.58    0.85
   2   2   3    1.79    0.57
   2  -2   3    1.94    0.76
   2  -2   3    1.11    0.18
   2   2   3    1.52    0.53
  -2   2  -3    2.22    0.61
  -2   2  -3    2.03    0.20
  -2  -2  -3    1.73    0.35
   2  -2   4   88.39    1.77
   2  -2   4   90.00    3.22
   2   2   4   82.12    2.92
   2   2   4   94.42    3.20
  -2   2  -4   87.35    2.96
  -2  -2  -4   89.52    2.15
   2  -2   5   71.13    3.30
   2   2   5   70.74    2.89
   2   2   5   68.37    2.85
  -2   2  -5   76.14    2.98
  -2  -2  -5   75.89    2.03
  -2   2  -5   73.55    1.91
   2   2   6   74.47    3.48
   2  -2   6   74.17    3.53
  -2   2  -6   76.97    2.20
  -2  -2  -6   77.24    2.22
  -2   2  -6   72.04    3.14
   2  -2   7   36.56    2.71
   2   2   7   44.21    2.76
  -2   2  -7   41.57    2.35
  -2  -2  -7   42.51    2.54
  -2  -2  -7   40.41    1.54
  -2   2  -7   39.91    1.62
   2  -2   8    0.44    1.19
   2   2   8    1.84    0.97
  -2   2  -8    0.25    0.46
  -2  -2  -8    2.07    0.96
  -2  -2  -8    1.09    0.41
  -2   2  -8    2.29    0.86
   2   2   9   -0.99    1.24
   2  -2   9   -0.83    1.47
  -2  -2  -9    0.59    0.99
  -2  -2  -9    0.19    0.44
  -2   2  -9    2.18    0.56
  -2   2  -9    1.33    0.86
   2   2  10   21.80    2.81
   2  -2  10   20.61    3.44
  -2  -2 -10   19.44    2.31
  -2   2 -10   19.41    1.56
  -2   2 -10   22.06    2.09
  -2  -2 -10   19.67    1.26
   2  -2  11   18.34    2.86
   2   2  11   16.30    2.38
  -2  -2 -11   14.02    1.13
  -2  -2 -11   16.75    2.23
  -2   2 -11    9.58    2.00
  -2   2 -11   13.28    1.55
   2   2  12   19.74    3.20
   2  -2  12   19.55    3.73
  -2   2 -12   22.93    2.52
  -2   2 -12   19.33    1.91
  -2  -2 -12   20.19    2.68
  -2  -2 -12   21.14    1.42
   2   2  13   11.50    2.65
   2  -2  13   14.61    2.91
  -2  -2 -13   13.79    1.29
  -2   2 -13   13.02    2.15
  -2  -2 -13   15.83    2.62
  -2   2 -13   14.83    1.95
   2  -2  14    3.88    2.81
   2   2  14    5.07    2.17
  -2   2 -14    6.40    1.80
  -2  -2 -14    6.16    2.22
  -2   2 -14    4.03    1.57
   2  -2  15    2.04    2.08
  -2   2 -15   -0.47    1.14
  -2  -2 -15   -0.09    1.59
  -2   2 -15    0.95    1.36
   2  -2  16   -1.54    3.07
  -2  -2 -16    0.80    2.19
  -2   2 -16    4.33    1.64
   2   2  17   -1.11    2.44
   2  -2  17    1.26    2.70
  -2   2 -17    0.89    1.67
  -2  -2 -17    0.77    1.66
   2  -2  18    2.39    3.19
   2   2  18    2.90    2.98
  -2  -2 -18   -0.78    2.48
   2  -2  19    0.57    2.49
  -2  -2 -19   -0.44    2.03
   2  -4 -19    1.80    2.49
  -2  -4  19    0.96    2.87
  -2   4  19   -1.33    2.15
   2   4 -18   -0.85    1.95
   2  -4 -18    1.01    2.65
  -2   4  18   -1.36    2.53
  -2  -4  18   -1.64    2.83
   2   4 -17    5.78    2.49
   2  -4 -17    9.54    2.71
  -2  -4  17    8.30    3.69
  -2   4  17    3.05    2.60
   2   4 -16    0.71    1.69
   2  -4 -16    1.65    2.06
  -2   4  16   -0.40    2.11
  -2  -4  16    0.62    2.03
   2  -4 -15   22.07    3.34
   2   4 -15   17.50    3.04
  -2   4  15   25.37    3.99
  -2  -4  15   24.18    4.52
   2  -4 -14    5.01    2.37
   2   4 -14    4.21    1.45
   2   4 -14    3.61    1.90
  -2   4  14    8.44    2.47
  -2  -4  14    8.82    2.92
   2  -4 -13    1.30    1.65
   2   4 -13    2.45    1.38
   2   4 -13   -0.10    1.00
  -2   4  13    3.31    1.84
  -2  -4  13    0.69    2.37
   2   4 -12    2.54    1.39
   2   4 -12    1.14    1.02
   2  -4 -12    2.44    1.48
  -2  -4  12    2.24    1.87
  -2   4  12    3.07    1.86
   2   4 -11   35.41    2.39
   2   4 -11   38.44    3.16
   2  -4 -11   37.28    3.16
  -2   4  11   36.46    3.29
  -2  -4  11   39.39    3.89
   2   4 -10    0.73    1.11
   2   4 -10    0.37    0.70
   2  -4 -10    0.76    1.32
  -2  -4  10    0.88    1.68
  -2   4  10    4.22    1.46
   2  -4  -9  109.35    5.42
   2   4  -9  112.58    5.32
   2   4  -9  116.09    4.03
  -2  -4   9  108.79    6.07
  -2   4   9  110.54    5.55
   2  -4  -8    0.44    0.62
   2   4  -8   -0.38    0.41
   2   4  -8    0.00    0.68
  -2   4   8   -0.22    0.67
  -2  -4   8    1.54    0.99
   2   4  -7   69.47    2.22
   2   4  -7   64.92    3.35
   2  -4  -7   74.42    3.55
  -2   4   7   74.26    3.96
  -2  -4   7   74.88    4.15
   2   4  -6    2.45    0.91
   2   4  -6    1.48    0.37
   2  -4  -6    1.47    0.94
  -2  -4   6    0.99    1.14
  -2   4   6    2.03    0.91
   2   4  -5   23.36    1.73
   2   4  -5   21.35    0.96
   2  -4  -5   18.77    1.47
  -2   4   5   22.06    1.57
  -2   4   5   20.23    0.51
  -2  -4   5   21.30    1.85
   2  -4  -4   20.57    1.54
   2   4  -4   22.04    1.50
   2   4  -4   20.27    0.86
  -2   4   4   22.52    1.66
  -2  -4   4   21.97    1.64
  -2   4   4   23.23    0.78
   2   4  -3   90.49    2.16
   2   4  -3   95.30    3.50
   2  -4  -3   89.15    3.19
  -2   4   3   93.39    2.26
  -2  -4   3   85.47    3.18
  -2   4   3   95.89    3.55
   2   4  -2    8.16    0.89
   2  -4  -2    9.67    0.89
   2   4  -2    9.74    0.62
  -2   4   2    8.76    0.87
  -2   4   2    7.53    0.64
  -2  -4   2    8.02    0.93
   2   4  -1  153.06    4.07
   2  -4  -1  143.77    3.63
   2   4  -1  150.85    3.60
   2   4  -1  150.99    4.54
  -2   4   1  149.19    4.50
  -2   4   1  146.25    3.73
   2   4   0   -0.43    0.41
   2   4   0    1.08    0.49
   2   4   0    1.10    0.47
   2  -4   0    0.21    0.33
  -2   4   0    1.26    0.47
  -2   4   0    0.34    0.56
   2  -4   1   36.03    1.09
   2   4   1   34.82    1.62
   2   4   1   35.31    1.71
   2   4   1   36.83    1.69
  -2   4  -1   33.69    1.73
  -2   4  -1   35.60    1.78
   2  -4   2    0.67    0.75
   2   4   2    1.78    0.56
   2   4   2    2.19    0.50
   2   4   2    2.22    0.56
   2  -4   2    2.07    0.26
  -2   4  -2    1.14    0.70
   2   4   3   31.94    1.76
   2  -4   3   33.50    2.05
   2   4   3   28.78    1.70
  -2   4  -3   33.59    1.86
  -2  -4  -3   32.04    1.34
   2   4   4    2.96    0.76
   2   4   4    0.71    0.70
   2  -4   4    1.89    0.75
  -2  -4  -4    0.91    0.44
  -2   4  -4    0.35    0.83
   2  -4   5  340.02    9.90
   2   4   5  344.02    9.33
   2   4   5  345.66    9.71
  -2   4  -5  347.88    9.95
  -2  -4  -5  352.68    6.32
   2   4   6   20.59    1.87
   2  -4   6   17.79    1.98
  -2  -4  -6   17.99    0.92
  -2   4  -6   19.50    1.86
  -2  -4  -6   21.10    1.75
   2   4   7   68.18    3.76
   2  -4   7   76.85    4.16
  -2   4  -7   66.82    1.63
  -2  -4  -7   73.83    2.10
  -2  -4  -7   75.13    3.75
  -2   4  -7   72.87    3.81
   2   4   8    3.65    1.33
   2  -4   8    1.41    1.72
  -2  -4  -8    2.61    0.45
  -2   4  -8    3.00    1.10
  -2  -4  -8    2.61    1.25
  -2   4  -8    2.42    0.43
   2  -4   9    7.66    2.59
   2   4   9   12.56    2.08
  -2   4  -9   14.09    1.95
  -2   4  -9    9.45    0.83
  -2  -4  -9   11.44    1.64
  -2  -4  -9    9.57    0.70
   2   4  10   -0.17    1.28
   2  -4  10    0.94    1.61
  -2   4 -10   -1.00    1.07
  -2   4 -10   -0.10    0.50
  -2  -4 -10   -0.54    1.10
   2  -4  11   32.35    3.67
   2   4  11   39.39    3.84
  -2   4 -11   39.80    3.52
  -2   4 -11   37.15    2.05
  -2  -4 -11   36.98    3.59
   2   4  12   -0.45    1.19
   2  -4  12   -0.25    1.41
  -2  -4 -12    0.95    1.03
  -2   4 -12   -0.64    0.58
  -2   4 -12    1.32    1.18
   2   4  13   24.08    3.24
   2  -4  13   29.93    4.15
  -2   4 -13   24.94    3.28
  -2  -4 -13   24.98    3.52
   2   4  14    0.27    1.62
   2  -4  14    2.03    2.37
  -2   4 -14   -0.67    1.61
  -2  -4 -14    1.46    1.84
   2   4  15   -0.25    1.62
  -2   4 -15    1.51    1.65
  -2  -4 -15    0.22    1.99
   2  -4  16    2.46    2.38
   2   4  16    0.41    2.82
  -2  -4 -16    4.75    2.55
  -2   4 -16    4.10    2.25
   2  -4  17   -1.14    3.05
   2   4  17    1.34    2.35
  -2  -4 -17    0.47    2.63
  -2   4 -17    5.68    2.29
   2  -4  18    0.70    3.13
   2   4  18   -0.47    2.84
  -2   4 -18   -0.16    2.29
  -2  -4 -18    3.19    2.26
   2  -6 -18    0.16    2.40
   2   6 -18   -0.52    2.03
  -2  -6  18    1.22    2.73
   2   6 -17    4.46    2.63
   2  -6 -17    4.29    3.05
  -2   6  17    1.25    2.56
  -2  -6  17    1.85    3.35
   2   6 -16    8.45    2.56
   2  -6 -16    8.53    3.45
  -2  -6  16   19.23    4.46
  -2   6  16    6.94    2.73
   2  -6 -15    6.69    2.78
   2   6 -15    9.34    3.04
  -2  -6  15   11.44    3.50
  -2   6  15   13.88    3.33
   2  -6 -14    3.39    2.29
   2   6 -14    4.30    2.13
  -2   6  14   -0.11    2.15
  -2  -6  14    1.08    2.73
   2   6 -13   -0.35    1.99
   2  -6 -13    1.88    2.12
  -2  -6  13    6.40    2.61
  -2   6  13    1.77    2.06
   2  -6 -12    6.62    1.86
   2   6 -12    4.86    1.86
  -2  -6  12   10.04    2.33
  -2   6  12    4.87    2.31
   2  -6 -11   10.78    2.36
   2   6 -11    3.13    2.02
  -2  -6  11   13.15    2.91
  -2   6  11    8.47    1.98
   2  -6 -10   21.18    2.93
   2   6 -10   24.41    2.81
  -2   6  10   22.22    2.97
  -2  -6  10   21.18    3.73
   2   6  -9   55.38    4.17
   2  -6  -9   57.31    4.15
  -2   6   9   58.58    4.34
  -2  -6   9   65.29    4.96
   2  -6  -8   45.65    3.34
   2   6  -8   45.50    3.72
  -2   6   8   53.38    3.55
  -2  -6   8   50.47    3.82
   2   6  -7   31.99    2.84
   2  -6  -7   33.62    2.59
   2   6  -7   32.58    1.21
  -2  -6   7   38.17    3.33
  -2   6   7   32.33    2.68
   2   6  -6    8.01    1.34
   2   6  -6    8.44    0.58
   2  -6  -6    8.43    1.61
  -2   6   6    7.94    0.57
  -2  -6   6    5.77    1.45
  -2   6   6    9.22    1.69
   2   6  -5    1.79    0.38
   2   6  -5    3.96    0.94
   2  -6  -5    1.08    1.06
  -2  -6   5   -0.08    1.17
  -2   6   5    1.31    0.42
  -2   6   5    0.44    0.88
   2  -6  -4   22.73    1.92
   2   6  -4   21.20    2.05
   2   6  -4   21.35    1.02
  -2  -6   4   22.86    1.86
  -2   6   4   20.62    1.11
  -2   6   4   22.52    1.83
   2   6  -3   29.93    2.12
   2  -6  -3   30.04    2.09
   2   6  -3   30.33    1.37
  -2   6   3   30.08    2.26
  -2  -6   3   30.71    2.24
  -2   6   3   36.13    1.66
   2   6  -2   38.10    1.62
   2  -6  -2   32.92    1.92
   2   6  -2   35.80    2.41
  -2  -6   2   37.72    2.34
  -2   6   2   36.30    1.90
  -2   6   2   41.25    2.38
   2   6  -1  100.66    4.27
   2  -6  -1  100.12    3.32
   2   6  -1   99.95    3.93
   2   6  -1  103.29    3.29
  -2   6   1  106.49    3.85
  -2   6   1  100.18    4.32
   2   6   0   12.53    1.37
   2   6   0   12.80    1.26
   2   6   0   13.88    1.14
   2  -6   0   13.28    0.93
  -2   6   0   13.21    1.39
  -2   6   0   14.75    1.59
   2   6   1    7.50    1.04
   2   6   1    7.04    1.16
   2   6   1    9.97    1.19
   2  -6   1    8.23    0.69
  -2   6  -1    7.61    1.25
  -2   6  -1    9.59    1.43
   2  -6   2    1.76    1.04
   2   6   2    3.48    0.71
   2  -6   2    1.35    0.37
   2   6   2    2.67    0.75
   2   6   2    2.17    0.67
  -2   6  -2    0.72    1.00
   2   6   3   17.15    1.31
   2  -6   3   15.90    0.55
   2  -6   3   16.82    1.86
   2   6   3   14.92    1.57
   2   6   3   13.45    1.53
  -2   6  -3   17.97    1.69
   2  -6   4   43.73    3.08
   2   6   4   39.17    2.61
   2   6   4   42.35    2.00
  -2   6  -4   44.64    2.83
   2  -6   5   56.82    3.74
   2   6   5   62.20    3.40
  -2  -6  -5   57.05    2.18
  -2  -6  -5   57.02    3.45
  -2   6  -5   56.30    3.45
   2  -6   6   45.20    3.36
   2   6   6   49.82    3.08
  -2  -6  -6   45.88    1.88
  -2   6  -6   47.87    3.43
  -2  -6  -6   49.04    3.36
   2   6   7   29.70    2.66
   2  -6   7   31.30    2.90
  -2  -6  -7   26.73    1.29
  -2  -6  -7   27.20    2.43
  -2   6  -7   25.83    2.48
   2   6   8    3.08    1.28
  -2  -6  -8   -0.41    1.03
   2   6   9    1.76    1.21
   2  -6   9    0.31    1.45
  -2  -6  -9   -0.68    1.02
  -2   6  -9    0.06    1.04
   2   6  10   13.86    2.60
   2  -6  10   15.87    3.37
  -2  -6 -10   13.11    2.42
  -2   6 -10   14.34    2.19
   2  -6  11   21.85    3.82
   2   6  11   13.50    2.54
  -2  -6 -11   19.45    3.05
  -2   6 -11   21.14    3.02
   2  -6  12    8.84    2.73
  -2  -6 -12    9.18    2.63
  -2   6 -12   11.69    2.73
   2  -6  13   17.09    3.15
   2   6  13   15.63    3.38
  -2  -6 -13   10.11    3.14
  -2   6 -13   14.01    2.64
   2   6  14    2.28    2.21
   2  -6  14   -1.20    2.04
  -2  -6 -14    2.35    2.20
  -2   6 -14    0.54    2.04
   2   6  15    1.37    2.28
   2  -6  15    0.84    2.06
  -2   6 -15    0.45    2.19
  -2  -6 -15    0.18    2.26
   2   6  16    0.96    2.57
   2  -6  16    0.13    3.42
  -2  -6 -16    1.92    2.35
  -2   6 -16    0.50    1.84
   2  -6  17   11.40    3.91
   2   6  17    3.28    3.29
  -2  -6 -17    0.08    2.95
  -2   6 -17   -0.80    2.81
   2  -8 -16    8.32    3.25
   2   8 -16   11.22    3.88
  -2  -8  16   16.96    4.48
  -2   8  16    6.68    3.48
   2  -8 -15    0.53    1.75
   2   8 -15   -1.61    2.14
  -2   8  15   -0.53    2.21
   2   8 -14   -1.63    2.27
   2  -8 -14   -1.41    2.25
  -2   8  14    6.34    2.51
  -2  -8  14    2.23    2.24
   2  -8 -13   -0.63    1.93
   2   8 -13    1.96    1.99
  -2  -8  13    1.50    1.91
  -2   8  13   -0.21    2.18
   2   8 -12   31.48    3.76
   2  -8 -12   29.78    4.22
  -2   8  12   32.52    4.46
  -2  -8  12   25.95    4.92
   2  -8 -11    5.22    2.23
   2   8 -11    8.28    2.35
  -2   8  11    0.85    1.96
  -2  -8  11    2.11    2.68
   2  -8 -10   51.97    4.65
   2   8 -10   51.62    4.76
  -2   8  10   59.07    4.76
  -2  -8  10   55.46    5.45
   2   8  -9    3.25    1.45
   2  -8  -9   -1.14    1.72
  -2   8   9    1.65    1.74
  -2  -8   9    2.25    2.10
   2   8  -8    4.19    1.68
   2  -8  -8    5.76    1.97
  -2   8   8    5.63    2.06
  -2  -8   8    6.70    2.36
   2   8  -7   -0.21    1.35
   2  -8  -7    0.05    1.28
  -2  -8   7    0.96    1.28
  -2   8   7    1.64    1.39
   2   8  -6    9.69    1.86
   2  -8  -6   12.23    2.03
  -2   8   6   10.20    0.98
  -2   8   6    7.59    1.70
  -2  -8   6    7.86    2.29
   2   8  -5    3.06    1.32
   2  -8  -5    4.15    1.44
  -2   8   5    2.78    0.72
  -2   8   5    4.19    1.56
  -2  -8   5    4.41    1.66
   2  -8  -4   26.52    2.42
   2   8  -4   25.48    2.46
   2   8  -4   21.49    1.28
  -2   8   4   23.32    2.35
  -2   8   4   24.32    1.73
  -2  -8   4   28.02    2.52
   2  -8  -3    1.10    0.98
   2   8  -3   -0.60    1.19
   2   8  -3    0.62    0.47
  -2   8   3    0.99    0.81
  -2   8   3    0.83    1.18
  -2  -8   3    3.85    1.28
   2   8  -2   70.07    4.27
   2   8  -2   74.26    2.88
   2  -8  -2   73.36    3.39
  -2   8   2   70.95    4.25
  -2   8   2   71.80    3.53
  -2  -8   2   70.57    4.21
   2   8  -1    1.83    0.67
   2  -8  -1    2.49    0.82
   2   8  -1    1.64    0.96
   2   8  -1    0.86    0.69
  -2   8   1   -0.30    0.98
  -2   8   1    2.01    1.21
   2   8   0   70.44    3.67
   2  -8   0   62.85    2.75
   2   8   0   68.42    3.80
   2   8   0   63.36    3.14
  -2   8   0   65.86    3.93
  -2   8   0   68.44    3.79
   2  -8   1    2.50    0.62
   2   8   1    3.28    1.21
   2   8   1    4.10    1.22
  -2   8  -1   -0.57    0.78
  -2   8  -1    3.73    1.26
   2  -8   2    5.66    0.77
   2   8   2   10.18    1.64
   2  -8   2   10.87    1.85
   2   8   2    8.46    1.47
  -2   8  -2    5.31    1.65
  -2  -8  -2    7.22    1.48
   2   8   3   -0.37    0.99
   2  -8   3   -0.19    1.05
   2   8   3    1.99    1.11
  -2   8  -3   -0.92    1.18
  -2  -8  -3    2.52    1.04
   2  -8   4  121.28    6.26
   2   8   4  130.74    5.06
   2   8   4  125.25    5.78
  -2   8  -4  117.70    6.10
  -2  -8  -4  125.63    5.81
   2  -8   5    4.31    1.64
   2   8   5    5.51    1.58
  -2  -8  -5    3.40    1.59
  -2   8  -5    5.01    1.77
   2  -8   6   71.78    4.97
   2   8   6   73.18    4.68
  -2   8  -6   71.76    5.01
  -2  -8  -6   66.25    2.81
  -2  -8  -6   74.44    4.77
   2  -8   7    5.88    2.11
  -2  -8  -7    3.05    1.29
  -2   8  -7    4.70    1.45
  -2  -8  -7    1.48    0.73
   2  -8   8    9.37    2.78
   2   8   8   12.39    2.36
  -2   8  -8   11.46    2.51
  -2  -8  -8   10.83    2.04
   2  -8   9   -1.24    1.55
   2   8   9    0.49    1.03
  -2   8  -9   -0.91    1.02
  -2  -8  -9    1.55    1.21
   2  -8  10    5.42    2.71
   2   8  10    3.96    1.83
  -2  -8 -10    4.46    2.23
  -2   8 -10    4.13    1.87
   2  -8  11    0.95    2.29
   2   8  11    1.28    2.00
  -2  -8 -11    0.88    1.58
  -2   8 -11    1.77    1.93
   2  -8  12   29.89    5.10
   2   8  12   27.49    4.29
  -2  -8 -12   25.02    4.28
  -2   8 -12   31.48    4.36
   2   8  13   -0.94    2.03
   2  -8  13    0.53    2.00
  -2  -8 -13    1.37    2.00
  -2   8 -13    0.50    1.62
   2  -8  14   14.06    3.86
   2   8  14   14.83    3.99
  -2   8 -14   15.93    3.47
  -2  -8 -14   19.73    4.16
   2  -8  15    3.01    2.40
   2   8  15    0.19    2.11
  -2   8 -15    0.32    2.53
  -2  -8 -15    0.08    2.12
   2  -8  16   -0.24    2.22
   2   8  16   -0.60    2.43
  -2   8 -16    0.01    2.35
  -2  -8 -16   -0.21    1.81
   2  10 -14    0.15    2.21
   2 -10 -14    4.98    2.43
  -2  10  14   -0.87    3.01
  -2 -10  14    5.23    3.49
   2 -10 -13    1.10    2.11
   2  10 -13   -0.95    2.05
  -2  10  13   -0.22    2.12
  -2 -10  13    1.41    2.61
   2  10 -12    0.80    2.09
   2 -10 -12    6.10    2.58
  -2  10  12    2.09    2.63
  -2 -10  12    0.29    2.45
   2 -10 -11    2.98    2.02
   2  10 -11   -0.16    2.28
  -2 -10  11    3.83    2.95
  -2  10  11    3.74    2.58
   2 -10 -10   15.33    3.19
   2  10 -10   24.23    3.90
  -2  10  10   23.87    4.02
  -2 -10  10   23.36    3.77
   2 -10  -9   15.19    3.27
   2  10  -9   15.07    3.29
  -2 -10   9   17.96    3.79
  -2  10   9   20.70    3.38
   2  10  -8   23.88    3.62
   2 -10  -8   31.27    3.32
  -2  10   8   27.45    3.69
  -2 -10   8   23.32    4.09
   2 -10  -7    5.33    2.17
   2  10  -7    3.72    1.85
  -2 -10   7    5.66    2.51
  -2  10   7    5.73    2.26
   2 -10  -6   13.48    2.48
   2  10  -6   11.93    2.81
  -2 -10   6   14.04    2.96
  -2  10   6   14.35    2.85
   2 -10  -5    0.86    1.55
   2  10  -5    4.14    1.91
  -2  10   5    2.91    0.94
  -2 -10   5   -1.13    1.52
  -2  10   5    4.71    1.74
   2  10  -4   12.81    2.72
   2 -10  -4   15.98    2.29
  -2  10   4   16.37    1.72
  -2  10   4   15.26    2.30
  -2 -10   4   13.82    2.82
   2  10  -3   29.75    3.30
   2 -10  -3   23.80    2.57
  -2  10   3   27.50    2.87
  -2  10   3   28.67    2.59
  -2 -10   3   25.12    1.63
  -2 -10   3   25.55    2.82
   2 -10  -2   57.12    3.60
   2  10  -2   55.41    4.29
  -2  10   2   55.77    4.10
  -2 -10   2   48.17    4.35
  -2 -10   2   51.04    2.67
  -2  10   2   56.62    3.59
   2 -10  -1    3.54    1.22
   2  10  -1    9.79    1.95
  -2  10   1    7.68    1.73
  -2  10   1    5.50    1.65
  -2 -10   1    4.64    2.12
  -2 -10   1    5.91    1.15
   2 -10   0    6.14    1.29
   2  10   0    5.69    1.92
   2  10   0    6.24    2.03
  -2  10   0    5.66    1.71
  -2 -10   0    4.67    1.24
  -2  10   0    7.27    2.04
   2  10   1    3.36    1.66
   2  10   1    1.53    1.44
   2 -10   1    0.91    1.76
   2 -10   1    2.59    0.80
  -2  10  -1    4.19    1.58
  -2 -10  -1    1.93    1.19
   2 -10   2    3.15    1.58
   2  10   2    3.73    1.68
   2  10   2    2.63    1.53
  -2  10  -2    5.41    1.82
  -2 -10  -2    0.90    1.39
   2 -10   3    3.38    1.64
   2  10   3   -0.24    1.32
   2  10   3   -0.09    1.15
  -2  10  -3    3.40    1.31
  -2 -10  -3   -0.04    1.33
   2  10   4   45.96    3.39
   2  10   4   48.23    3.73
   2 -10   4   43.19    4.02
  -2  10  -4   48.12    4.45
  -2 -10  -4   40.94    3.64
   2  10   5   31.96    3.65
   2  10   5   32.90    2.55
   2 -10   5   37.42    3.60
  -2 -10  -5   34.12    3.38
  -2  10  -5   35.42    3.99
   2  10   6   21.84    2.67
   2 -10   6   20.15    3.42
  -2  10  -6   19.94    3.32
  -2 -10  -6   22.82    3.16
   2 -10   7   11.94    2.88
   2  10   7    6.61    1.95
  -2  10  -7    8.77    2.63
  -2 -10  -7    4.43    1.95
   2 -10   8   -2.11    1.79
   2  10   8   -1.53    1.51
  -2  10  -8   -0.38    1.65
  -2 -10  -8    4.27    1.58
   2  10   9   -0.77    1.56
   2 -10   9    0.70    1.93
  -2 -10  -9    4.88    2.06
   2 -10  10    7.93    3.59
   2  10  10    5.63    2.78
  -2  10 -10    9.16    3.08
  -2 -10 -10    5.61    2.28
   2  10  11    1.98    2.19
   2 -10  11    5.22    2.66
  -2  10 -11    3.45    2.73
  -2 -10 -11    4.07    2.64
   2  10  12    7.42    3.54
   2 -10  12   16.91    4.43
  -2 -10 -12   11.73    3.41
  -2  10 -12   14.81    3.36
   2  10  13    6.66    3.47
   2 -10  13    4.05    3.93
  -2  10 -13    1.93    2.75
  -2 -10 -13    8.73    3.33
   2 -10  14    3.43    3.87
   2  10  14    0.49    2.76
  -2 -10 -14    2.38    3.18
  -2  10 -14    7.05    2.71
   2 -12 -11    7.44    3.75
   2  12 -11    6.48    3.12
  -2 -12  11   15.54    4.22
  -2  12  11   11.64    3.93
   2 -12 -10    1.23    2.22
   2  12 -10    3.17    2.27
  -2  12  10    2.91    2.80
  -2 -12  10    1.39    3.35
   2 -12  -9   16.52    3.89
   2  12  -9   17.24    3.52
  -2 -12   9   16.96    3.85
  -2  12   9   13.99    4.02
   2  12  -8   -0.31    1.72
   2 -12  -8    0.07    1.62
  -2 -12   8   -1.07    2.32
  -2  12   8    3.35    2.10
   2  12  -7    8.24    3.14
   2 -12  -7    9.43    3.03
  -2 -12   7    5.93    2.70
  -2  12   7    8.60    2.50
   2 -12  -6    2.38    1.80
   2  12  -6    1.10    1.98
  -2 -12   6    0.19    2.17
  -2  12   6   -1.84    1.85
   2 -12  -5    1.32    2.06
   2  12  -5    1.35    1.85
  -2 -12   5    7.50    2.47
  -2  12   5    1.81    2.34
   2  12  -4    6.38    2.23
   2 -12  -4    0.89    1.79
  -2 -12   4   -1.47    2.32
  -2  12   4    1.82    2.09
   2  12  -3   32.01    4.23
   2 -12  -3   29.78    3.48
  -2  12   3   34.46    4.49
  -2 -12   3   39.90    4.57
  -2  12   3   29.48    3.29
   2 -12  -2    0.03    1.33
   2  12  -2   -1.01    1.91
  -2 -12   2    2.84    1.69
  -2  12   2    0.34    1.48
  -2  12   2    4.95    1.70
   2 -12  -1   35.60    3.00
   2  12  -1   38.44    4.33
  -2 -12   1   35.74    3.88
  -2  12   1   33.23    3.83
  -2  12   1   38.29    4.37
   2  12   0    6.88    1.95
   2 -12   0    0.56    1.71
  -2 -12   0    1.20    1.36
  -2 -12   0   -0.38    2.14
  -2  12   0    1.05    1.81
   2 -12   1    4.78    2.26
   2  12   1    1.73    2.09
   2  12   1    0.29    1.92
  -2 -12  -1    0.95    1.52
  -2  12  -1    4.15    1.97
   2  12   2    0.94    1.60
   2 -12   2   -1.89    1.90
   2  12   2   -0.96    1.79
  -2 -12  -2   -0.80    1.32
  -2  12  -2    0.11    1.45
   2  12   3   20.18    2.98
   2 -12   3   14.26    3.40
   2  12   3   14.07    3.10
  -2 -12  -3    9.84    2.67
  -2  12  -3   12.48    2.66
   2  12   4   -1.31    1.55
   2  12   4    1.02    1.44
  -2  12  -4    3.95    1.76
  -2 -12  -4    1.98    1.77
   2  12   5   39.87    4.70
   2 -12   5   45.44    5.31
  -2 -12  -5   48.05    4.71
  -2  12  -5   40.24    5.07
   2  12   6    0.36    2.32
   2 -12   6    5.23    2.67
  -2 -12  -6    1.65    2.38
  -2  12  -6    7.42    2.65
   2 -12   7   10.19    3.05
   2  12   7    7.39    3.20
  -2 -12  -7    6.22    2.93
  -2  12  -7    9.58    2.67
   2 -12   8   -0.37    2.47
   2  12   8   -0.56    2.13
  -2 -12  -8    2.28    2.10
  -2  12  -8    0.67    1.82
   2  12   9    0.85    1.93
   2 -12   9    1.00    1.93
  -2 -12  -9   -0.04    2.19
  -2  12  -9   -1.31    1.92
   2  12  10   -1.04    2.37
   2 -12  10    1.68    2.99
  -2 -12 -10    1.61    2.65
  -2  12 -10    1.84    2.62
   2  12  11   11.93    3.72
   2 -12  11    6.42    4.24
  -2 -12 -11    6.28    3.04
  -2  12 -11    7.15    3.01
   2  14  -6    1.25    2.11
  -2 -14   6    1.22    2.12
  -2  14   6   -1.57    1.66
   2  14  -5    6.04    2.95
  -2  14   5    2.98    2.93
  -2 -14   5   -1.17    2.49
   2  14  -4    7.37    3.57
  -2  14   4    4.83    3.21
  -2 -14   4    4.99    3.44
   2  14  -3   14.82    4.11
  -2  14   3   11.84    3.33
  -2 -14   3   13.09    4.20
   2  14  -2    7.08    3.32
  -2 -14   2    7.06    2.91
  -2  14   2    7.01    2.15
   2 -14  -1   11.60    3.25
   2  14  -1   10.42    3.68
  -2 -14   1   15.70    3.97
  -2  14   1    9.42    3.29
   2  14   0   -0.89    2.51
   2 -14   0    1.14    2.18
  -2  14   0   -0.67    2.52
  -2 -14   0    9.53    2.73
   2 -14   1    2.10    2.27
   2  14   1    1.77    2.87
  -2 -14  -1    3.46    2.72
  -2  14  -1    2.33    2.52
   2  14   2    0.59    1.29
   2 -14   2    1.21    2.42
  -2  14  -2    0.28    1.87
   2 -14   3    6.62    3.14
   2  14   3    0.48    2.38
  -2  14  -3    3.67    2.86
   2  14   4    6.63    3.39
   2 -14   4    6.10    3.00
  -2  14  -4    5.04    2.81
   2 -14   5   22.22    4.19
   2  14   5   18.96    4.41
  -2 -14  -5   14.17    4.15
  -2  14  -5   12.70    4.57
   2 -14   6    3.81    3.91
   2  14   6    6.43    2.75
  -2 -14  -6    5.95    3.22
  -2  14  -6    3.26    3.55
   3  -1 -20   -2.32    2.53
  -3   1  20    2.01    2.44
  -3  -1  20   -0.06    1.96
   3   1 -19    4.33    3.23
   3  -1 -19   11.33    3.36
  -3  -1  19    1.99    3.58
  -3   1  19    2.40    3.58
   3   1 -18   10.68    3.20
   3  -1 -18    1.72    3.15
  -3  -1  18    6.28    2.92
  -3   1  18    3.75    2.67
   3  -1 -17    3.08    2.58
   3   1 -17    5.13    2.28
  -3  -1  17    2.39    3.04
  -3   1  17    0.86    2.29
   3   1 -16   19.26    2.25
   3   1 -16   22.78    3.87
   3  -1 -16   25.12    3.83
  -3  -1  16   24.92    3.94
  -3   1  16   26.52    3.57
   3   1 -15   -0.81    1.41
   3   1 -15    1.17    0.96
   3  -1 -15   -0.51    1.28
  -3  -1  15    2.06    2.07
  -3   1  15   -0.44    1.87
   3   1 -14    2.83    1.04
   3  -1 -14    4.79    1.94
   3   1 -14    2.05    1.82
  -3   1  14   -0.25    2.11
  -3  -1  14    3.11    2.05
   3   1 -13    6.67    1.86
   3  -1 -13    2.92    0.91
   3  -1 -13    5.06    1.66
   3   1 -13    6.98    1.19
  -3  -1  13    5.32    2.56
  -3   1  13    5.97    2.36
   3  -1 -12   25.39    2.99
   3   1 -12   21.55    1.88
   3  -1 -12   22.59    1.42
   3   1 -12   23.44    2.65
  -3  -1  12   24.61    3.16
  -3   1  12   26.18    2.79
   3   1 -11    5.83    1.23
   3  -1 -11    8.48    0.84
   3  -1 -11   12.07    1.95
   3   1 -11   10.10    1.81
  -3   1  11   12.56    2.29
  -3  -1  11   11.87    2.60
   3  -1 -10  138.88    6.00
   3  -1 -10  138.31    3.92
   3   1 -10  139.44    4.92
   3   1 -10  144.19    5.87
  -3  -1  10  139.54    6.64
  -3   1  10  139.28    6.69
   3   1  -9   33.09    2.51
   3  -1  -9   30.68    1.33
   3   1  -9   31.50    1.91
   3  -1  -9   28.88    2.20
  -3   1   9   29.18    2.70
  -3  -1   9   28.13    2.90
   3   1  -8   23.57    1.89
   3  -1  -8   19.59    1.69
   3  -1  -8   18.83    1.01
   3   1  -8   18.89    1.32
  -3   1   8   19.28    1.80
  -3  -1   8   18.49    2.17
   3  -1  -7    1.30    0.32
   3   1  -7    1.04    0.83
   3   1  -7    1.07    0.57
   3  -1  -7   -0.34    0.86
  -3  -1   7    1.18    0.90
  -3   1   7    1.80    0.77
   3  -1  -6   19.20    0.84
   3   1  -6   19.49    1.26
   3   1  -6   19.48    1.50
   3  -1  -6   20.87    1.61
  -3   1   6   18.77    1.62
  -3  -1   6   19.05    1.55
   3   1  -5   24.01    1.28
   3  -1  -5   22.71    1.57
   3   1  -5   21.83    1.43
  -3   1   5   25.80    1.62
  -3  -1   5   23.12    1.50
   3   1  -4  252.27    5.52
   3  -1  -4  239.84    6.01
   3   1  -4  248.93    5.78
  -3  -1   4  268.76    6.26
  -3   1   4  251.09    5.91
  -3   1   4  251.44    4.05
   3  -1  -3  116.53    3.53
   3   1  -3  104.72    2.85
   3   1  -3  102.13    2.94
  -3   1   3  100.20    2.73
  -3   1   3  102.84    2.07
  -3  -1   3  102.38    2.73
   3   1  -2  101.54    2.05
   3   1  -2  113.03    2.79
   3  -1  -2  108.47    3.05
   3   1  -2  110.22    2.79
  -3   1   2  111.37    2.25
  -3  -1   2  110.34    2.09
  -3   1   2  107.43    2.41
   3   1  -1    0.14    0.34
   3   1  -1    0.12    0.11
   3  -1  -1    1.00    0.33
   3  -1  -1   -0.02    0.20
  -3  -1   1    0.25    0.13
  -3   1   1    0.14    0.21
  -3  -1   1    0.09    0.28
   3  -1   0   26.24    1.01
   3  -1   0   24.06    0.80
   3   1   0   27.87    1.04
  -3  -1   0   28.31    0.45
  -3  -1   0   29.29    1.17
  -3   1   0   27.93    0.87
  -3   1   0   28.11    1.08
   3   1   1   55.00    1.11
   3   1   1   53.10    1.69
   3  -1   1   58.40    1.51
   3  -1   1   55.99    1.51
  -3   1  -1   57.02    1.79
  -3  -1  -1   52.08    1.16
  -3  -1  -1   54.39    1.70
   3   1   2    0.99    0.40
   3  -1   2    0.73    0.54
   3   1   2    1.54    0.45
   3  -1   2    1.00    0.30
  -3  -1  -2    1.17    0.50
  -3   1  -2    1.57    0.58
   3  -1   3   28.64    1.11
   3   1   3   28.54    1.40
   3  -1   3   28.96    1.47
   3   1   3   28.62    1.49
  -3   1  -3   30.21    1.51
  -3  -1  -3   27.32    1.25
   3   1   4  326.85    7.49
   3  -1   4  330.86    6.14
   3  -1   4  319.09    7.66
   3   1   4  318.94    7.54
  -3  -1  -4  323.98    6.48
  -3   1  -4  315.36    7.28
   3   1   5   43.32    1.98
   3   1   5   47.13    2.56
   3  -1   5   47.85    1.76
   3  -1   5   46.06    2.61
  -3   1  -5   46.04    2.14
  -3  -1  -5   47.87    1.87
   3  -1   6  141.69    3.92
   3   1   6  146.84    5.55
   3  -1   6  142.12    5.55
   3   1   6  142.38    4.79
  -3   1  -6  144.79    4.69
  -3  -1  -6  155.60    4.22
   3   1   7    1.08    0.60
   3  -1   7    0.74    0.99
   3   1   7    2.26    0.99
  -3   1  -7    0.15    0.74
  -3   1  -7    1.51    0.56
  -3  -1  -7    0.64    0.59
   3  -1   8    8.19    1.72
   3   1   8    6.76    1.88
  -3  -1  -8    7.59    0.96
  -3   1  -8    4.37    1.12
  -3  -1  -8    8.34    1.11
  -3   1  -8    7.38    1.04
   3  -1   9   33.69    3.25
   3   1   9   34.00    3.32
  -3  -1  -9   30.86    1.79
  -3  -1  -9   31.94    2.47
  -3   1  -9   29.83    2.23
  -3   1  -9   33.02    2.05
   3  -1  10   20.69    3.20
   3   1  10   26.43    3.27
  -3   1 -10   21.34    2.09
  -3  -1 -10   17.31    1.97
  -3   1 -10   22.20    1.88
  -3  -1 -10   21.02    1.62
   3  -1  11    1.02    2.22
   3   1  11   -0.62    2.06
  -3  -1 -11    2.64    1.09
  -3  -1 -11    2.22    0.97
  -3   1 -11    2.66    1.26
  -3   1 -11    1.16    1.13
   3   1  12   48.49    4.96
   3  -1  12   42.72    4.74
  -3   1 -12   37.46    2.98
  -3   1 -12   39.30    3.09
  -3  -1 -12   39.59    2.61
  -3  -1 -12   41.65    3.25
   3   1  13    0.76    1.59
   3  -1  13    3.36    1.93
  -3   1 -13   -0.31    1.18
  -3  -1 -13   -0.18    0.78
  -3  -1 -13    1.42    1.31
  -3   1 -13   -0.06    1.07
   3  -1  14   -0.50    2.58
   3   1  14    5.24    1.98
  -3  -1 -14    3.90    1.88
  -3  -1 -14   -0.64    1.06
  -3   1 -14    6.79    1.66
  -3   1 -14    3.32    1.54
   3  -1  15    1.16    2.14
  -3   1 -15    0.47    1.26
  -3   1 -15   -1.07    1.17
  -3  -1 -15    1.42    1.49
   3  -1  16    0.73    2.42
   3   1  16    1.59    2.17
  -3   1 -16   -0.44    1.40
  -3   1 -16    0.41    1.46
  -3  -1 -16    0.50    1.66
   3   1  17    0.90    2.50
   3  -1  17    4.72    3.37
  -3  -1 -17    1.14    2.35
  -3   1 -17    5.31    2.24
   3   1  18    1.19    3.47
   3  -1  18    0.19    3.17
  -3  -1 -18    8.46    2.81
   3  -1  19   -1.21    3.39
   3   1  19   -0.64    3.05
   3  -3 -19    2.84    2.64
  -3  -3  19    2.00    3.67
  -3   3  19    2.34    3.21
   3  -3 -18    2.45    2.85
  -3   3  18    1.39    2.72
  -3  -3  18    3.04    3.26
   3   3 -17    7.40    2.47
   3  -3 -17   17.55    3.65
  -3   3  17    8.45    2.98
  -3  -3  17   16.39    4.20
   3  -3 -16    1.01    1.71
   3   3 -16   -0.45    1.56
   3   3 -16    1.43    1.50
  -3  -3  16    0.36    2.42
  -3   3  16    1.48    2.14
   3   3 -15    9.08    2.03
   3  -3 -15    5.97    2.62
   3   3 -15    5.80    1.84
  -3  -3  15    8.16    3.05
  -3   3  15    8.10    2.75
   3   3 -14    0.05    1.06
   3   3 -14   -1.29    1.19
  -3  -3  14    0.50    1.94
  -3   3  14    4.66    1.77
   3   3 -13    9.62    1.77
   3  -3 -13   16.38    2.76
   3   3 -13   11.64    2.05
  -3  -3  13   16.88    3.28
  -3   3  13    9.28    2.63
   3  -3 -12   16.82    2.70
   3   3 -12   15.88    2.11
   3   3 -12   13.20    1.97
  -3   3  12   11.67    2.71
  -3  -3  12   13.31    2.78
   3   3 -11   79.28    4.49
   3  -3 -11   91.14    5.57
   3   3 -11   81.12    4.13
  -3   3  11   84.40    5.14
  -3  -3  11  104.02    6.62
   3   3 -10    9.68    1.54
   3  -3 -10    8.62    1.89
   3   3 -10   10.55    1.52
  -3  -3  10   11.59    2.73
  -3   3  10   10.62    1.73
   3   3  -9   11.96    1.39
   3  -3  -9    9.01    1.43
   3   3  -9    6.56    1.44
  -3  -3   9    5.60    2.10
  -3   3   9    8.49    1.79
   3  -3  -8    1.12    0.83
   3   3  -8    0.01    0.63
   3   3  -8    1.59    0.66
  -3  -3   8   -1.05    1.21
  -3   3   8    1.81    0.88
   3   3  -7   49.28    2.28
   3   3  -7   45.26    2.63
   3  -3  -7   47.13    2.76
  -3  -3   7   41.69    2.92
  -3   3   7   47.77    2.88
   3   3  -6   14.79    1.41
   3  -3  -6   13.09    1.37
   3   3  -6   12.03    1.04
  -3   3   6   12.89    1.31
  -3  -3   6   15.02    1.47
   3   3  -5   70.40    3.06
   3  -3  -5   71.72    3.11
   3   3  -5   70.10    2.30
  -3  -3   5   70.46    3.11
  -3   3   5   67.89    3.04
  -3   3   5   69.04    1.16
   3   3  -4   52.20    1.77
   3   3  -4   54.53    2.36
   3  -3  -4   51.88    2.30
  -3   3   4   51.77    2.26
  -3  -3   4   52.30    2.31
  -3   3   4   49.42    1.16
   3   3  -3   45.51    1.58
   3  -3  -3   43.08    2.01
   3   3  -3   42.81    2.08
  -3   3   3   41.82    1.21
  -3  -3   3   44.56    1.83
  -3   3   3   43.85    2.02
   3   3  -2    4.00    0.76
   3   3  -2    1.44    0.49
   3  -3  -2    3.25    0.71
  -3   3   2    3.81    0.66
  -3   3   2    3.36    0.40
  -3  -3   2    2.44    0.56
   3   3  -1   19.33    1.33
   3  -3  -1   20.90    1.18
   3   3  -1   18.70    1.01
  -3  -3   1   18.89    0.94
  -3   3   1   19.75    1.09
  -3   3   1   18.28    1.00
   3   3   0   10.33    1.02
   3  -3   0    9.44    0.80
   3   3   0   10.97    0.80
   3   3   0    9.99    0.64
  -3   3   0   10.76    0.92
  -3   3   0   11.29    0.79
   3   3   1    8.86    0.79
   3  -3   1   10.93    0.60
   3   3   1   10.76    0.87
   3  -3   1    9.77    0.89
   3   3   1   10.85    0.70
  -3   3  -1   11.12    0.98
   3   3   2   10.10    1.02
   3  -3   2    9.66    0.46
   3   3   2    9.91    0.77
   3  -3   2   10.08    0.94
  -3  -3  -2    9.78    0.84
  -3   3  -2   10.51    1.02
   3  -3   3  250.03    6.53
   3  -3   3  240.41    3.13
   3   3   3  255.81    6.80
   3   3   3  252.92    5.78
  -3   3  -3  244.06    6.64
  -3  -3  -3  249.71    5.37
   3  -3   4   36.20    0.94
   3   3   4   32.14    1.94
   3  -3   4   36.07    2.02
   3   3   4   33.71    1.70
  -3  -3  -4   36.31    1.51
  -3   3  -4   35.01    2.04
   3   3   5  169.75    5.64
   3  -3   5  186.73    6.12
   3  -3   5  170.33    3.00
   3   3   5  176.24    5.51
  -3  -3  -5  177.09    4.12
  -3   3  -5  182.23    6.00
   3   3   6   23.55    1.93
   3   3   6   21.21    1.86
   3  -3   6   24.74    2.44
  -3   3  -6   24.22    1.00
  -3  -3  -6   28.04    1.32
  -3   3  -6   25.90    2.10
   3   3   7   16.85    1.97
   3   3   7   22.05    1.73
   3  -3   7   20.33    2.44
  -3  -3  -7   20.76    1.13
  -3   3  -7   19.19    1.75
  -3   3  -7   19.78    0.99
   3   3   8    0.16    0.87
   3  -3   8    1.35    1.12
  -3   3  -8   -0.17    0.35
  -3  -3  -8    0.98    0.42
  -3   3  -8    0.28    0.69
  -3  -3  -8    0.55    0.94
   3   3   9    5.26    1.52
   3  -3   9    5.38    2.31
  -3   3  -9    5.82    0.78
  -3  -3  -9    5.70    0.73
  -3   3  -9    6.62    1.55
  -3  -3  -9    5.91    1.59
   3  -3  10    6.00    2.09
   3   3  10    4.05    2.06
  -3  -3 -10    5.51    0.77
  -3   3 -10    6.28    0.88
  -3  -3 -10   10.10    1.76
  -3   3 -10    7.05    1.68
   3  -3  11   24.86    3.89
   3   3  11   31.78    3.44
  -3  -3 -11   27.81    3.02
  -3   3 -11   27.77    2.89
  -3  -3 -11   24.34    1.51
  -3   3 -11   24.13    1.70
   3   3  12    9.61    2.57
   3  -3  12   15.10    3.25
  -3  -3 -12    7.77    1.12
  -3  -3 -12    6.79    1.90
  -3   3 -12    9.11    1.25
  -3   3 -12    6.86    2.10
   3   3  13   12.25    3.23
   3  -3  13   18.23    3.22
  -3  -3 -13   15.23    2.72
  -3   3 -13   15.39    2.53
  -3   3 -13   11.94    1.80
   3  -3  14    2.80    2.48
  -3   3 -14    1.77    1.68
  -3  -3 -14    0.86    1.49
  -3   3 -14    1.25    1.11
   3   3  15    6.11    2.59
  -3   3 -15   -0.23    1.87
   3  -3  16    0.65    2.57
   3   3  16    3.26    2.65
  -3  -3 -16    1.18    1.71
  -3   3 -16   -0.46    1.82
   3   3  17    1.90    2.46
   3  -3  17    0.33    2.90
  -3   3 -17    0.05    2.08
  -3  -3 -17    3.45    2.45
   3  -3  18   -1.32    3.65
   3   3  18    7.03    2.89
  -3  -3 -18   -0.59    2.79
   3   5 -18    7.76    2.91
   3  -5 -18    9.01    3.71
  -3  -5  18    0.97    3.80
  -3   5  18    7.19    3.53
   3   5 -17    5.77    2.71
   3  -5 -17    4.47    2.59
  -3  -5  17    5.05    2.95
  -3   5  17   10.17    3.38
   3  -5 -16   -0.34    2.25
   3   5 -16    1.02    1.90
  -3   5  16   -0.37    1.81
  -3  -5  16    6.53    2.67
   3  -5 -15    5.23    2.57
   3   5 -15    4.05    1.72
  -3   5  15    1.96    2.52
  -3  -5  15    1.72    2.35
   3  -5 -14   -0.08    1.30
   3   5 -14    0.33    1.09
  -3   5  14   -0.16    1.65
  -3  -5  14   -1.75    1.98
   3   5 -13    2.85    1.60
   3  -5 -13    7.43    1.95
  -3  -5  13    6.33    2.83
  -3   5  13    4.99    2.47
   3   5 -12    0.92    0.70
   3   5 -12    0.17    1.25
   3  -5 -12   -0.89    1.23
  -3  -5  12    0.06    1.63
  -3   5  12    0.28    1.26
   3  -5 -11   98.63    5.81
   3   5 -11   86.39    3.59
   3   5 -11   96.35    5.63
  -3   5  11   95.64    6.21
  -3  -5  11   90.52    6.48
   3   5 -10   19.73    1.44
   3  -5 -10   19.75    2.42
   3   5 -10   20.07    2.48
  -3  -5  10   15.28    3.20
  -3   5  10   23.32    2.55
   3  -5  -9   48.59    3.92
   3   5  -9   47.27    3.62
   3   5  -9   50.39    2.27
  -3   5   9   51.45    3.59
  -3  -5   9   56.55    4.50
   3   5  -8    3.77    1.34
   3  -5  -8    6.43    1.25
   3   5  -8    2.66    0.61
  -3  -5   8    2.81    1.81
  -3   5   8    2.10    1.35
   3  -5  -7   -0.31    1.13
   3   5  -7    1.48    0.86
   3   5  -7    1.19    0.44
  -3   5   7   -0.21    1.08
  -3  -5   7    1.63    1.02
   3   5  -6    0.63    0.58
   3   5  -6   -0.03    0.28
   3  -5  -6   -0.33    0.69
  -3   5   6   -0.02    0.13
  -3  -5   6    0.47    0.79
   3   5  -5   61.67    3.47
   3  -5  -5   67.78    3.31
   3   5  -5   66.97    2.18
  -3  -5   5   64.48    3.32
  -3   5   5   63.33    1.71
  -3   5   5   64.24    3.52
   3   5  -4   29.95    2.12
   3   5  -4   36.19    1.41
   3  -5  -4   35.63    2.26
  -3  -5   4   31.06    2.07
  -3   5   4   32.61    1.30
  -3   5   4   33.56    2.10
   3   5  -3  406.77   11.06
   3  -5  -3  387.40    9.69
   3   5  -3  395.50    7.87
  -3  -5   3  401.57    9.88
  -3   5   3  384.73   10.55
  -3   5   3  405.82    7.89
   3  -5  -2   44.07    2.17
   3   5  -2   39.82    2.39
   3   5  -2   46.34    1.90
  -3   5   2   41.32    2.41
  -3  -5   2   44.23    2.07
  -3   5   2   41.92    1.86
   3   5  -1   31.32    1.84
   3   5  -1   25.55    1.44
   3   5  -1   27.55    1.60
   3  -5  -1   26.71    1.44
  -3   5   1   27.07    1.62
  -3   5   1   24.16    1.67
   3   5   0   12.96    1.34
   3   5   0   14.55    1.15
   3   5   0   12.18    1.13
   3  -5   0   14.61    0.99
  -3   5   0   14.22    1.27
  -3   5   0   12.28    1.24
   3   5   1   75.46    2.99
   3   5   1   78.40    3.24
   3  -5   1   81.82    2.37
   3   5   1   83.73    3.47
  -3   5  -1   77.63    3.33
  -3   5  -1   78.40    3.34
   3  -5   2   22.46    0.85
   3   5   2   21.67    1.53
   3   5   2   21.76    1.52
   3   5   2   20.64    1.64
   3  -5   2   21.46    1.64
  -3   5  -2   19.55    1.72
   3  -5   3  459.05    4.44
   3   5   3  462.08   11.94
   3   5   3  464.63   11.13
   3  -5   3  460.25   12.41
  -3  -5  -3  473.13   10.13
  -3   5  -3  468.30   12.31
   3   5   4   17.59    1.69
   3  -5   4   16.21    1.89
  -3  -5  -4   14.73    1.13
  -3   5  -4   17.15    1.85
   3  -5   5  114.34    5.38
   3   5   5  113.83    5.04
   3   5   5  118.68    4.76
  -3  -5  -5  119.25    3.51
  -3   5  -5  114.21    5.20
   3  -5   6    4.64    1.70
   3   5   6    8.48    1.46
   3   5   6    5.48    1.34
  -3  -5  -6    5.98    0.73
  -3   5  -6    6.40    1.53
   3  -5   7   15.69    2.48
   3   5   7   12.71    1.57
  -3   5  -7   12.94    1.99
  -3  -5  -7   11.63    0.96
  -3  -5  -7   12.16    1.96
   3  -5   8   -0.63    1.36
   3   5   8    1.38    1.11
  -3  -5  -8    0.50    0.48
   3   5   9   54.80    4.22
   3  -5   9   62.11    4.72
  -3   5  -9   59.25    4.32
  -3  -5  -9   51.94    2.00
  -3  -5  -9   54.97    3.82
   3   5  10   11.38    2.39
   3  -5  10   10.44    2.65
  -3  -5 -10   10.98    2.39
  -3   5 -10   10.78    2.10
   3  -5  11   24.49    3.94
   3   5  11   25.35    3.39
  -3   5 -11   24.13    3.20
  -3  -5 -11   23.55    3.08
   3  -5  12    5.20    1.87
   3   5  12    0.58    1.44
  -3  -5 -12    0.29    1.43
  -3   5 -12    0.06    1.65
   3  -5  13    1.36    1.96
   3   5  13    0.10    1.91
  -3   5 -13   -1.54    1.41
  -3  -5 -13    5.93    1.94
   3   5  14   -0.98    1.58
  -3  -5 -14    0.74    1.84
  -3   5 -14    2.14    1.72
   3   5  15    1.54    1.73
   3  -5  15    1.46    2.17
  -3   5 -15   -1.99    1.93
  -3  -5 -15    0.97    2.14
   3  -5  16    0.53    2.58
   3   5  16    1.40    2.25
  -3   5 -16    2.05    1.84
  -3  -5 -16   -2.07    1.65
   3   5  17   10.81    4.22
   3  -5  17   14.23    3.75
  -3  -5 -17    4.39    3.52
  -3   5 -17    9.22    3.44
   3  -7 -17    0.48    2.35
   3   7 -17    5.97    2.66
  -3   7  17    0.77    2.26
  -3  -7  17   -3.31    3.27
   3  -7 -16   13.02    3.62
   3   7 -16   10.26    3.31
  -3   7  16    8.38    3.72
  -3  -7  16    3.77    4.53
   3  -7 -15   -1.16    2.09
   3   7 -15    0.92    2.01
  -3   7  15   -0.10    2.13
  -3  -7  15    2.07    2.04
   3  -7 -14    1.28    2.38
   3   7 -14    6.88    2.34
  -3   7  14   -0.15    2.43
  -3  -7  14    2.40    2.95
   3   7 -13    1.26    1.52
   3  -7 -13    0.98    2.03
  -3   7  13    0.34    2.09
  -3  -7  13    1.36    2.67
   3  -7 -12   10.66    2.60
   3   7 -12   10.63    2.54
  -3   7  12    7.07    2.65
  -3  -7  12    4.97    2.60
   3  -7 -11   12.84    2.96
   3   7 -11   16.31    2.46
  -3   7  11   18.49    2.73
  -3  -7  11   15.63    3.49
   3  -7 -10   49.98    4.53
   3   7 -10   44.33    3.82
  -3   7  10   47.88    4.04
  -3  -7  10   49.27    4.46
   3  -7  -9   14.87    2.29
   3   7  -9   16.06    2.22
  -3   7   9   13.95    2.30
  -3  -7   9   10.72    2.91
   3   7  -8   18.08    2.31
   3  -7  -8   21.78    2.79
  -3   7   8   18.45    2.83
  -3  -7   8   26.67    2.76
   3  -7  -7    0.23    1.51
   3   7  -7    1.87    0.52
   3   7  -7    3.11    1.45
  -3   7   7    3.50    1.25
  -3  -7   7    3.89    1.77
   3  -7  -6   11.20    1.83
   3   7  -6    9.63    1.80
   3   7  -6    7.42    0.77
  -3   7   6    7.51    1.72
  -3   7   6    6.38    0.68
  -3  -7   6    8.81    1.93
   3  -7  -5   18.75    2.22
   3   7  -5   17.14    1.11
   3   7  -5   20.14    2.35
  -3  -7   5   18.39    1.95
  -3   7   5   16.57    1.10
  -3   7   5   18.64    2.19
   3  -7  -4   74.15    3.78
   3   7  -4   75.63    2.69
   3   7  -4   69.17    3.99
  -3   7   4   75.71    2.87
  -3   7   4   76.85    4.16
  -3  -7   4   75.70    4.16
   3   7  -3   44.78    2.01
   3  -7  -3   46.51    2.78
   3   7  -3   47.17    3.17
  -3   7   3   47.77    2.33
  -3   7   3   42.53    2.91
  -3  -7   3   44.82    2.97
   3  -7  -2   84.73    3.71
   3   7  -2   84.36    3.23
   3   7  -2   77.83    4.03
  -3   7   2   87.36    3.67
  -3  -7   2   87.40    4.16
  -3   7   2   85.04    4.26
   3   7  -1    2.23    0.94
   3  -7  -1    3.38    0.89
   3   7  -1    2.65    0.96
   3   7  -1    3.76    0.82
  -3   7   1    3.76    1.00
  -3   7   1    4.06    1.08
   3   7   0    0.43    1.03
   3   7   0    2.45    0.99
   3   7   0    1.72    0.79
   3  -7   0    0.52    0.54
  -3   7   0    0.04    0.89
  -3   7   0    3.05    0.94
   3  -7   1    2.74    0.69
   3   7   1    3.72    0.98
   3   7   1    4.11    1.09
   3   7   1    1.47    1.01
  -3   7  -1    1.49    0.74
  -3   7  -1    2.34    0.94
   3   7   2   35.36    2.54
   3  -7   2   36.48    1.50
   3   7   2   42.21    2.75
   3  -7   2   38.95    2.77
   3   7   2   39.35    2.68
  -3   7  -2   37.00    2.90
   3   7   3   14.52    1.75
   3   7   3   14.72    1.54
   3   7   3   12.31    1.73
   3  -7   3   14.97    2.17
  -3   7  -3   13.96    1.79
   3  -7   4  106.71    5.79
   3   7   4  109.22    4.98
   3   7   4  100.33    4.92
  -3   7  -4  111.27    5.53
   3  -7   5   21.26    2.72
   3   7   5   20.34    2.17
  -3   7  -5   19.36    2.55
  -3  -7  -5   17.76    1.42
   3  -7   6   32.27    3.55
   3   7   6   38.02    2.81
  -3   7  -6   33.70    3.27
  -3  -7  -6   32.81    1.82
  -3  -7  -6   38.78    3.32
   3   7   7   -0.94    1.24
   3  -7   7   -1.10    1.67
  -3   7  -7    5.13    1.48
  -3  -7  -7    0.58    0.63
  -3  -7  -7    1.33    1.34
   3  -7   8   -0.89    1.92
   3   7   8    2.32    1.54
  -3   7  -8    1.45    1.61
  -3  -7  -8    3.37    1.37
   3  -7   9   14.99    2.88
   3   7   9   16.77    2.64
  -3   7  -9   17.12    2.50
  -3  -7  -9   20.84    2.55
   3  -7  10   12.76    3.13
   3   7  10   11.39    2.53
  -3  -7 -10    9.45    2.15
  -3   7 -10    9.93    2.65
   3  -7  11    6.25    2.81
   3   7  11    3.94    2.21
  -3   7 -11    0.59    2.21
  -3  -7 -11    4.51    1.75
   3   7  12    4.74    2.56
   3  -7  12    4.63    2.51
  -3  -7 -12    5.41    2.41
  -3   7 -12    5.96    2.49
   3  -7  13    1.45    2.31
   3   7  13    6.09    2.42
  -3   7 -13    0.51    1.92
  -3  -7 -13    2.54    2.20
   3  -7  14    3.50    2.80
   3   7  14    1.43    2.38
  -3   7 -14   -0.18    2.44
  -3  -7 -14    2.37    2.39
   3  -7  15   -1.82    3.03
   3   7  15   -2.55    2.52
  -3   7 -15   -2.39    2.37
  -3  -7 -15    1.94    2.64
   3  -7  16    1.67    2.59
   3   7  16    0.93    2.21
  -3  -7 -16    2.67    2.82
  -3   7 -16    1.25    2.72
   3   9 -16    2.07    3.24
   3  -9 -16    3.68    2.61
  -3   9  16    4.35    2.85
  -3  -9  16    0.80    3.87
   3  -9 -15    1.41    2.15
   3   9 -15   -0.98    2.46
  -3   9  15    1.70    2.68
   3   9 -14   -1.35    2.40
   3  -9 -14    1.99    2.07
  -3  -9  14    3.90    3.08
  -3   9  14    1.65    2.62
   3  -9 -13    0.10    1.90
   3   9 -13    1.81    1.84
  -3  -9  13   -0.55    2.73
  -3   9  13    1.05    2.25
   3  -9 -12    5.86    2.18
   3   9 -12    5.03    2.57
  -3  -9  12   -1.72    3.10
  -3   9  12    3.10    2.17
   3  -9 -11    1.95    2.51
   3   9 -11    6.44    2.49
  -3  -9  11    3.34    2.36
  -3   9  11    5.11    2.60
   3   9 -10   47.93    4.55
   3  -9 -10   53.71    5.05
  -3  -9  10   51.00    5.58
  -3   9  10   51.95    5.25
   3  -9  -9    0.36    1.49
   3   9  -9    1.77    1.56
  -3  -9   9    4.07    2.08
  -3   9   9    0.84    1.92
   3   9  -8   23.70    3.56
   3  -9  -8   28.85    3.50
  -3  -9   8   26.36    3.83
  -3   9   8   28.07    3.53
   3  -9  -7    5.96    2.16
   3   9  -7    9.43    1.98
  -3  -9   7    6.12    2.39
  -3   9   7    5.28    1.80
   3  -9  -6    7.91    2.02
   3   9  -6    5.17    2.08
  -3  -9   6    6.67    1.82
  -3   9   6    4.83    2.04
   3  -9  -5    3.85    1.77
   3   9  -5    7.00    1.95
  -3  -9   5    3.01    1.97
  -3   9   5    3.08    0.96
  -3   9   5    3.73    1.75
   3   9  -4   75.77    4.94
   3  -9  -4   80.95    4.71
   3   9  -4   74.44    2.98
  -3  -9   4   78.25    5.04
  -3   9   4   75.80    3.66
  -3   9   4   72.34    5.02
   3   9  -3   16.65    1.36
   3  -9  -3   17.66    2.11
   3   9  -3   15.39    2.58
  -3  -9   3   12.99    2.45
  -3   9   3   15.09    1.75
  -3   9   3   17.25    2.49
   3  -9  -2  122.33    5.23
   3   9  -2  114.94    4.58
   3   9  -2  112.34    6.11
  -3  -9   2  111.23    5.71
  -3   9   2  116.31    5.43
  -3   9   2  113.66    6.04
   3   9  -1    2.55    0.94
   3  -9  -1    3.72    1.16
   3   9  -1    2.42    1.21
  -3   9   1    1.80    1.58
  -3  -9   1    2.81    1.57
  -3   9   1    5.42    1.43
   3   9   0    4.05    1.26
   3  -9   0    4.14    1.00
   3   9   0    3.40    1.67
   3   9   0    5.12    1.41
  -3   9   0    5.93    1.60
  -3   9   0    4.67    1.48
   3  -9   1    4.13    1.48
   3  -9   1    3.70    0.86
   3   9   1    7.27    1.66
   3   9   1    4.27    1.67
   3   9   1    3.24    1.29
  -3   9  -1    6.86    1.63
   3  -9   2   23.30    2.93
   3   9   2   28.79    2.82
   3   9   2   25.18    2.70
  -3   9  -2   22.64    2.82
   3  -9   3   12.76    2.61
   3   9   3   14.16    2.25
   3   9   3   16.09    2.06
  -3  -9  -3   14.05    1.88
  -3   9  -3    9.72    2.39
   3   9   4   47.45    3.02
   3  -9   4   47.71    4.02
   3   9   4   47.20    3.81
  -3   9  -4   50.21    4.23
  -3  -9  -4   56.19    4.01
   3  -9   5    0.83    2.01
   3   9   5    4.54    1.61
  -3  -9  -5    5.15    1.65
  -3  -9  -5    1.27    1.14
   3  -9   6   35.83    3.65
   3   9   6   42.28    3.59
  -3  -9  -6   34.72    2.32
  -3   9  -6   35.04    3.97
  -3  -9  -6   39.96    3.43
   3   9   7   -1.04    1.32
  -3   9  -7    1.94    1.63
  -3  -9  -7    0.88    1.45
   3  -9   8    5.26    2.45
   3   9   8    0.79    1.90
  -3   9  -8    4.45    1.82
  -3  -9  -8    4.88    2.07
   3  -9   9    0.84    1.88
   3   9   9    0.60    1.51
  -3   9  -9   -0.49    1.96
  -3  -9  -9    5.43    1.71
   3  -9  10    9.25    2.99
   3   9  10    8.38    2.47
  -3   9 -10   13.67    3.03
  -3  -9 -10   11.07    2.54
   3  -9  11    3.04    3.10
   3   9  11    1.15    2.40
  -3   9 -11    1.76    2.49
  -3  -9 -11    6.88    2.55
   3  -9  12    5.48    3.06
   3   9  12   13.90    3.38
  -3  -9 -12    6.93    3.04
  -3   9 -12    5.63    3.09
   3   9  13    3.76    2.78
   3  -9  13    2.92    2.57
  -3   9 -13    0.78    2.77
  -3  -9 -13    2.31    2.12
   3  -9  14    1.31    3.22
   3   9  14    0.60    2.82
  -3  -9 -14    2.26    2.20
  -3   9 -14    0.53    2.81
   3   9  15    0.06    2.81
   3  -9  15    9.34    3.25
  -3   9 -15   -0.91    2.20
  -3  -9 -15   -1.58    2.76
   3 -11 -13   -0.61    2.88
   3  11 -13    2.99    2.67
  -3 -11  13    0.76    3.19
   3 -11 -12    9.71    3.16
   3  11 -12    5.17    3.25
  -3 -11  12    2.71    3.82
  -3  11  12    1.83    3.16
   3  11 -11   11.27    3.27
   3 -11 -11   14.59    3.47
  -3  11  11   14.28    3.33
  -3 -11  11   21.12    4.53
   3 -11 -10    7.24    3.33
   3  11 -10   10.45    2.75
  -3  11  10   11.20    2.92
  -3 -11  10    8.15    3.94
   3 -11  -9   11.43    3.20
   3  11  -9    5.86    2.46
  -3 -11   9    6.82    3.51
  -3  11   9    8.18    2.65
   3 -11  -8    2.09    1.80
   3  11  -8    2.63    2.21
  -3  11   8   -2.23    2.17
  -3 -11   8    3.39    2.39
   3 -11  -7    2.83    1.73
   3  11  -7   -0.04    1.55
  -3  11   7   -0.85    1.58
  -3 -11   7    1.42    1.94
   3  11  -6    4.43    2.31
   3 -11  -6    5.54    2.15
  -3  11   6    4.01    2.29
  -3 -11   6    0.95    2.05
   3  11  -5   19.27    3.35
   3 -11  -5   13.55    2.81
  -3 -11   5   21.02    3.28
  -3  11   5   15.49    3.05
   3 -11  -4   12.24    2.55
   3  11  -4   10.79    2.90
  -3  11   4   14.77    2.15
  -3 -11   4   18.02    3.22
  -3  11   4   14.81    2.65
   3  11  -3   53.32    4.88
   3 -11  -3   54.01    4.17
  -3  11   3   53.23    4.86
  -3 -11   3   55.33    4.96
  -3  11   3   59.14    3.98
   3 -11  -2   22.37    2.37
   3  11  -2   23.05    3.28
  -3 -11   2   15.44    2.64
  -3 -11   2   17.23    1.95
  -3  11   2   15.78    2.62
  -3  11   2   19.32    2.94
   3 -11  -1   14.05    2.02
   3  11  -1   16.94    2.83
  -3  11   1   11.78    2.35
  -3  11   1   13.64    2.96
  -3 -11   1   13.37    1.74
  -3 -11   1   16.67    2.86
   3  11   0    0.04    1.47
  -3  11   0    0.41    1.35
  -3 -11   0   -1.23    1.11
   3  11   1    6.47    2.19
   3 -11   1    5.78    2.40
   3  11   1   10.43    2.20
  -3  11  -1    5.66    2.17
  -3 -11  -1    3.27    1.75
   3  11   2   16.53    2.87
   3  11   2   18.22    2.90
   3 -11   2   12.18    3.17
  -3  11  -2   18.36    2.97
  -3 -11  -2   13.03    2.62
   3  11   3   73.18    5.37
   3 -11   3   70.22    5.78
   3  11   3   64.09    4.97
  -3 -11  -3   76.39    5.19
  -3  11  -3   68.19    5.63
   3  11   4   25.37    3.57
   3 -11   4   30.44    4.24
   3  11   4   27.33    3.08
  -3  11  -4   33.51    3.75
  -3 -11  -4   28.84    3.53
   3  11   5   30.21    3.85
   3 -11   5   31.18    4.26
  -3  11  -5   34.47    4.27
  -3 -11  -5   25.24    2.64
  -3 -11  -5   37.97    3.89
   3  11   6    3.29    2.31
   3 -11   6    6.16    2.50
  -3  11  -6    3.56    2.54
  -3 -11  -6    4.07    1.88
   3 -11   7    2.33    2.00
   3  11   7    2.61    2.13
  -3  11  -7    3.87    2.41
  -3 -11  -7   -0.91    2.09
   3 -11   8    1.38    2.86
   3  11   8    7.31    2.48
  -3 -11  -8    2.88    2.43
  -3  11  -8    3.11    2.81
   3 -11   9   15.77    3.63
   3  11   9    3.07    2.82
  -3  11  -9    5.62    2.69
  -3 -11  -9    5.66    2.59
   3  11  10    5.37    2.92
   3 -11  10    8.68    3.62
  -3  11 -10    5.64    3.23
  -3 -11 -10    5.45    3.04
   3  11  11    8.96    3.33
   3 -11  11    6.16    3.17
  -3  11 -11    1.97    3.37
  -3 -11 -11    5.61    3.14
   3 -11  12   11.01    3.79
   3  11  12    1.26    2.47
  -3 -11 -12    2.87    3.36
  -3  11 -12    2.97    2.61
   3 -13  -9    3.01    3.24
   3  13  -9    2.20    3.38
  -3  13   9    6.12    3.43
  -3 -13   9    9.63    3.70
   3  13  -8   -0.25    2.10
   3 -13  -8    1.68    2.33
  -3  13   8   -0.43    2.46
  -3 -13   8    2.57    2.70
   3 -13  -7   -0.59    2.33
   3  13  -7   -1.69    2.64
  -3 -13   7    7.41    2.73
  -3  13   7    0.95    2.43
   3 -13  -6   -0.50    1.93
   3  13  -6    0.38    2.20
  -3 -13   6    0.21    2.31
  -3  13   6   -0.83    2.01
   3  13  -5   24.57    4.38
   3 -13  -5   21.59    3.68
  -3 -13   5   15.18    3.99
  -3  13   5   16.84    3.47
   3  13  -4   -0.24    1.94
   3 -13  -4    0.77    1.54
  -3  13   4    0.84    1.84
  -3 -13   4   -1.33    1.95
   3  13  -3   23.39    4.25
  -3 -13   3   25.57    4.34
  -3  13   3   24.81    4.35
   3  13  -2   -0.11    2.55
  -3 -13   2    4.35    2.67
  -3  13   2    0.96    2.48
  -3  13   2    4.35    2.08
   3  13  -1    7.09    2.82
   3 -13  -1    5.53    2.34
  -3 -13   1    1.78    2.68
  -3  13   1    4.76    2.34
   3 -13   0    2.92    2.29
   3  13   0    0.01    2.19
   3  13   1    3.29    2.93
   3 -13   1    2.08    2.85
  -3 -13  -1   10.54    2.04
  -3 -13  -1    5.91    2.84
  -3  13  -1    1.83    2.66
   3  13   2    5.30    2.32
   3  13   2    2.47    2.29
   3 -13   2    0.71    2.00
  -3  13  -2   -0.23    1.85
   3 -13   3   12.97    3.74
   3  13   3   14.42    3.58
  -3  13  -3   15.96    3.04
  -3 -13  -3   14.14    3.09
   3  13   4   -0.51    2.27
   3 -13   4    5.47    2.21
  -3 -13  -4    0.75    2.17
  -3  13  -4    0.63    2.51
   3  13   5   14.96    3.74
   3 -13   5   21.45    4.23
  -3  13  -5   22.14    4.38
  -3 -13  -5   17.26    3.72
   3  13   6    1.40    2.56
   3 -13   6    2.84    2.87
  -3 -13  -6    1.58    2.37
  -3  13  -6    3.72    2.80
   3  13   7    5.72    2.89
   3 -13   7    5.08    3.23
  -3  13  -7    2.10    3.12
  -3 -13  -7    2.54    2.97
   3  13   8    0.27    2.53
   3 -13   8   -2.91    2.66
  -3 -13  -8    6.13    2.55
  -3  13  -8    0.05    2.67
  -4   0  20   -0.26    2.56
   4   0 -19    2.27    2.63
  -4   0  19   -1.20    2.59
   4   0 -18    1.84    3.20
  -4   0  18    7.44    2.73
  -4   0  17   -2.20    2.69
   4   0 -16    7.74    2.84
  -4   0  16    8.94    3.09
   4   0 -15   -0.05    0.82
   4   0 -15   -0.32    1.70
  -4   0  15   -0.81    1.76
   4   0 -14    4.41    1.95
   4   0 -14    2.93    0.96
  -4   0  14    1.51    2.14
   4   0 -13    2.07    0.83
   4   0 -13    1.46    1.75
  -4   0  13    1.85    1.89
   4   0 -12   38.37    2.19
   4   0 -12   32.49    3.27
  -4   0  12   39.30    4.33
   4   0 -11   -0.65    0.56
   4   0 -11   -0.67    1.25
  -4   0  11    1.31    1.56
   4   0 -10   39.74    2.01
   4   0 -10   42.56    3.06
  -4   0  10   40.06    3.39
   4   0  -9    0.01    0.43
   4   0  -9   -0.80    0.82
   4   0  -8    0.85    1.11
   4   0  -8    1.58    0.53
  -4   0   8    1.90    1.25
   4   0  -7    0.32    0.70
   4   0  -7    0.41    0.41
  -4   0   7   -0.68    0.85
   4   0  -6  380.11    9.96
   4   0  -6  410.05    8.39
  -4   0   6  412.00   10.31
   4   0  -5    0.11    0.42
   4   0  -5    0.41    0.73
  -4   0   5    1.96    0.70
   4   0  -4  310.40    7.35
  -4   0   4  320.54    6.63
   4   0  -3    0.06    0.65
  -4   0   3   -0.40    0.40
  -4   0   3    0.91    0.33
   4   0  -2  201.29    3.52
   4   0  -2  215.91    4.93
  -4   0   2  207.69    4.45
  -4   0   2  213.47    3.29
   4   0  -1    0.05    0.38
  -4   0   1    0.09    0.11
  -4   0   1    0.01    0.33
   4   0   0   73.68    1.16
   4   0   0   76.31    2.23
  -4   0   0   73.59    2.35
   4   0   1   -0.30    0.23
   4   0   1    0.16    0.30
  -4   0  -1    0.38    0.20
   4   0   2 3235.86   35.64
  -4   0  -2 3146.78   39.15
  -4   0  -3    0.41    0.45
   4   0   4   98.50    3.16
   4   0   4  108.59    3.85
  -4   0  -4   97.11    3.31
   4   0   5    0.62    0.57
  -4   0  -5    0.93    0.60
   4   0   6   24.47    1.96
   4   0   6   23.45    1.56
  -4   0  -6   25.35    1.67
   4   0   7    0.92    1.27
  -4   0  -7    2.40    0.83
   4   0   8  110.29    5.57
   4   0   8  104.02    4.26
  -4   0  -8  110.87    4.35
   4   0   9   -0.53    1.25
  -4   0  -9    1.20    0.78
   4   0  10   58.21    4.37
  -4   0 -10   60.18    3.35
  -4   0 -10   53.66    3.41
   4   0  11   -2.08    1.89
  -4   0 -11   -0.64    1.00
  -4   0 -11   -0.20    1.05
   4   0  12    3.84    2.33
  -4   0 -12    0.04    1.34
  -4   0 -12    2.32    1.08
   4   0  13    0.75    1.71
  -4   0 -13    0.55    1.20
   4   0  14    7.86    2.90
  -4   0 -14    0.42    1.39
  -4   0 -14    5.08    1.85
   4   0  15    3.96    2.77
  -4   0 -15    0.03    1.87
  -4   0 -15    2.51    1.39
   4   0  16    9.16    3.49
  -4   0 -16    2.12    1.93
   4   0  17   -0.85    2.69
  -4   0 -17   -0.79    1.95
   4   0  18    1.05    2.53
   4  -2 -19   -0.17    2.94
  -4  -2  19    2.14    2.74
  -4   2  19    2.02    2.89
   4   2 -18   -0.28    2.18
   4  -2 -18   -2.10    2.60
  -4  -2  18   -2.09    2.46
  -4   2  18   -0.25    2.62
   4   2 -17   -0.12    1.48
   4   2 -17    4.29    2.13
   4  -2 -17    6.62    2.25
  -4  -2  17   -1.17    3.13
  -4   2  17    6.08    2.72
   4   2 -16    0.90    1.70
   4   2 -16   -0.69    1.30
   4   2 -16   -0.31    1.47
   4  -2 -16    2.55    2.12
  -4  -2  16    3.80    2.42
  -4   2  16    2.32    1.76
   4   2 -15    0.01    1.38
   4   2 -15    2.45    1.89
   4  -2 -15    4.04    2.15
  -4  -2  15    4.71    2.14
  -4   2  15    6.29    2.43
   4   2 -14    1.11    1.29
   4   2 -14    1.09    1.69
   4  -2 -14    2.12    1.61
  -4  -2  14    3.43    2.45
  -4   2  14    4.13    1.79
   4   2 -13   -0.34    1.10
   4  -2 -13    6.33    1.88
  -4  -2  13    4.03    2.08
  -4   2  13    0.36    1.58
   4   2 -12   32.43    2.99
   4   2 -12   31.53    2.63
   4  -2 -12   33.56    3.50
  -4  -2  12   31.26    3.96
  -4   2  12   33.81    3.26
   4   2 -11   51.31    3.10
   4   2 -11   53.44    3.44
   4  -2 -11   54.43    3.80
  -4  -2  11   52.19    4.09
  -4   2  11   47.91    3.84
   4   2 -10   56.57    3.14
   4   2 -10   56.55    3.36
   4  -2 -10   57.81    3.66
  -4  -2  10   64.27    4.12
  -4   2  10   63.26    4.18
  -4   2  10   52.45    1.72
   4   2  -9   38.14    2.31
   4   2  -9   38.55    2.54
   4  -2  -9   36.84    2.65
  -4  -2   9   39.95    3.29
  -4   2   9   38.21    3.00
  -4   2   9   33.32    1.22
   4   2  -8    1.23    0.82
   4   2  -8    3.68    1.02
   4  -2  -8    1.15    0.94
  -4  -2   8    1.68    1.30
  -4   2   8    1.07    0.33
  -4   2   8    1.46    1.08
   4   2  -7   23.77    1.66
   4   2  -7   26.43    1.87
   4  -2  -7   21.93    1.81
  -4  -2   7   26.37    2.08
  -4   2   7   24.12    1.99
  -4   2   7   20.71    0.83
   4   2  -6  223.47    6.42
   4   2  -6  210.66    6.09
   4  -2  -6  215.47    6.78
  -4  -2   6  217.57    6.66
  -4   2   6  216.77    3.82
  -4   2   6  217.78    6.67
   4   2  -5  257.27    6.90
   4   2  -5  258.66    6.42
   4  -2  -5  270.72    7.63
  -4  -2   5  265.52    6.87
  -4   2   5  257.74    4.37
  -4   2   5  259.59    6.95
   4   2  -4  298.52    6.74
   4   2  -4  294.57    7.33
   4  -2  -4  297.32    7.73
  -4  -2   4  297.58    6.47
  -4   2   4  301.93    4.95
  -4   2   4  294.19    6.96
   4   2  -3  192.59    5.34
   4   2  -3  182.41    4.63
   4  -2  -3  197.06    5.66
  -4  -2   3  187.43    4.08
  -4   2   3  181.85    4.64
  -4   2   3  198.38    3.97
   4   2  -2   19.91    1.11
   4   2  -2   19.95    1.20
   4  -2  -2   17.06    1.21
  -4  -2   2   18.27    0.77
  -4   2   2   18.09    0.97
  -4   2   2   18.73    0.97
   4   2  -1    1.01    0.54
   4   2  -1    1.23    0.48
   4  -2  -1    1.89    0.70
  -4  -2   1    1.31    0.25
  -4  -2   1    1.02    0.22
  -4   2   1    1.46    0.44
  -4   2   1    2.46    0.46
   4   2   0    1.41    0.20
   4   2   0    2.72    0.48
   4  -2   0    1.21    0.53
  -4  -2   0    0.91    0.21
  -4  -2   0    1.64    0.52
  -4   2   0    2.28    0.46
  -4   2   0    1.70    0.48
   4   2   1   39.63    1.77
   4   2   1   38.09    1.04
   4  -2   1   39.15    1.39
   4  -2   1   35.60    1.52
  -4  -2  -1   37.78    1.59
  -4   2  -1   36.76    1.81
   4   2   2   29.24    1.08
   4   2   2   32.53    1.59
   4  -2   2   29.71    1.13
   4  -2   2   30.96    1.41
  -4  -2  -2   32.12    1.54
  -4   2  -2   30.96    1.69
   4   2   3   77.58    2.86
   4   2   3   80.25    2.50
   4  -2   3   72.80    1.91
   4  -2   3   76.58    2.83
  -4  -2  -3   78.94    2.62
  -4   2  -3   74.33    2.97
   4   2   4   67.58    2.91
   4   2   4   67.27    2.58
   4  -2   4   68.98    3.09
   4  -2   4   68.97    2.03
  -4  -2  -4   68.13    2.43
  -4   2  -4   71.55    2.90
   4   2   5   46.86    2.40
   4   2   5   46.98    2.39
   4  -2   5   50.08    1.80
   4  -2   5   47.94    2.85
  -4  -2  -5   49.01    2.14
  -4   2  -5   46.31    2.53
   4   2   6   27.44    2.07
   4   2   6   27.97    2.19
   4  -2   6   32.21    2.37
   4  -2   6   29.62    1.37
  -4  -2  -6   33.53    1.64
  -4   2  -6   30.75    2.13
   4   2   7   11.82    1.29
   4   2   7   12.67    1.71
   4  -2   7    9.32    1.88
   4  -2   7    8.92    0.84
  -4  -2  -7   11.05    1.01
  -4   2  -7   11.56    1.50
   4   2   8    7.98    1.76
   4   2   8   11.11    1.39
   4  -2   8   10.84    1.77
  -4  -2  -8    9.69    1.05
  -4   2  -8   10.17    1.08
  -4   2  -8    8.67    1.59
   4   2   9   10.10    2.13
   4  -2   9    6.12    2.43
  -4  -2  -9    9.06    1.77
  -4  -2  -9    7.68    1.18
  -4   2  -9   12.15    1.76
  -4   2  -9   10.57    1.24
   4   2  10   20.63    2.88
   4  -2  10   17.08    3.50
  -4  -2 -10   21.14    2.44
  -4  -2 -10   19.97    1.60
  -4   2 -10   18.86    1.70
  -4   2 -10   16.70    2.35
   4   2  11   12.93    2.70
   4  -2  11   13.62    3.39
  -4  -2 -11   12.08    1.32
  -4  -2 -11   13.13    2.25
  -4   2 -11   10.99    1.54
  -4   2 -11   15.38    2.23
   4   2  12    0.59    1.66
   4  -2  12    0.77    1.70
  -4  -2 -12    0.52    1.41
  -4  -2 -12    0.62    0.79
  -4   2 -12    1.47    1.25
   4   2  13    4.64    2.12
   4  -2  13    1.41    2.27
  -4  -2 -13    4.54    0.94
  -4  -2 -13    0.01    1.66
  -4   2 -13    0.57    1.32
  -4   2 -13   -0.27    1.50
   4   2  14   -0.71    2.29
   4  -2  14    2.44    2.40
  -4  -2 -14    3.42    1.81
  -4   2 -14   -1.08    1.31
  -4   2 -14    3.54    1.67
   4   2  15   -0.91    2.04
   4  -2  15    5.95    1.82
  -4  -2 -15   -0.38    1.65
  -4   2 -15   -1.21    1.20
  -4   2 -15   -0.37    1.51
   4   2  16    6.86    2.98
   4  -2  16    2.09    2.50
  -4  -2 -16    0.11    2.40
  -4   2 -16    2.04    1.76
   4   2  17   -0.81    2.79
   4  -2  17   -1.80    2.88
  -4   2 -17    2.58    1.85
   4   2  18    0.94    3.29
   4  -2  18    2.43    3.35
  -4  -2 -18    1.08    2.50
   4  -4 -19    8.99    4.14
  -4  -4  19    4.39    4.62
  -4   4  19    8.83    3.88
   4  -4 -18   -1.51    2.10
   4   4 -18    3.46    2.05
  -4   4  18    2.04    2.10
  -4  -4  18   -1.98    2.89
   4  -4 -17   12.85    3.67
   4   4 -17   11.16    2.84
  -4   4  17    8.62    3.65
  -4  -4  17   10.60    3.41
   4   4 -16    0.37    1.70
  -4   4  16    1.24    2.28
  -4  -4  16    1.98    2.10
   4   4 -15    0.26    1.68
   4  -4 -15    0.07    2.22
   4   4 -15    3.23    1.45
  -4  -4  15    0.38    2.48
  -4   4  15    4.04    2.18
   4   4 -14    4.62    1.78
   4  -4 -14    1.15    2.33
   4   4 -14    5.16    1.49
  -4  -4  14    2.21    2.45
  -4   4  14   -0.86    2.18
   4   4 -13    6.24    1.54
   4   4 -13    7.95    1.94
   4  -4 -13    6.05    2.33
  -4   4  13    6.24    2.00
  -4  -4  13    7.11    2.22
   4   4 -12    3.02    1.45
   4  -4 -12    5.56    2.04
   4   4 -12    3.09    1.38
  -4  -4  12    4.44    2.59
  -4   4  12    4.12    1.66
   4   4 -11   80.96    4.93
   4  -4 -11   80.55    5.01
   4   4 -11   80.30    4.12
  -4  -4  11   74.91    5.84
  -4   4  11   74.46    4.90
   4  -4 -10    3.49    1.75
   4   4 -10    2.28    1.41
   4   4 -10    3.70    1.10
  -4   4  10    5.30    1.71
  -4  -4  10    2.48    2.01
   4   4  -9   13.04    1.37
   4  -4  -9   16.39    2.32
   4   4  -9   12.66    1.93
  -4  -4   9   18.34    2.52
  -4   4   9   13.07    1.91
   4   4  -8    1.56    0.93
   4   4  -8   -0.37    0.61
   4  -4  -8   -0.70    1.02
  -4   4   8    0.96    1.01
  -4  -4   8    0.81    1.18
   4   4  -7   35.33    2.58
   4  -4  -7   35.87    2.73
   4   4  -7   34.18    1.78
  -4   4   7   38.35    2.72
  -4  -4   7   39.01    2.91
   4   4  -6    5.46    0.73
   4  -4  -6    3.35    1.09
   4   4  -6    6.09    1.23
  -4   4   6    4.60    1.24
  -4   4   6    4.87    0.35
  -4  -4   6    6.93    1.36
   4   4  -5  262.09    8.19
   4  -4  -5  254.54    7.97
   4   4  -5  260.99    6.35
  -4  -4   5  262.01    7.40
  -4   4   5  271.25    8.27
  -4   4   5  258.89    4.44
   4  -4  -4    2.35    0.74
   4   4  -4    1.94    0.60
   4   4  -4    2.61    0.86
  -4   4   4    2.39    0.83
  -4   4   4    0.91    0.34
  -4  -4   4    1.56    0.73
   4  -4  -3  422.99   10.17
   4   4  -3  417.58    8.64
   4   4  -3  432.20   11.15
  -4   4   3  424.61    7.75
  -4  -4   3  423.64    8.79
  -4   4   3  420.68   10.44
   4   4  -2   19.77    1.63
   4  -4  -2   22.66    1.50
   4   4  -2   20.64    1.23
  -4  -4   2   19.83    1.19
  -4   4   2   21.47    1.54
  -4   4   2   19.63    1.10
   4   4  -1    1.50    0.52
   4   4  -1    0.47    0.76
   4  -4  -1    0.75    0.63
  -4   4   1    0.62    0.61
  -4   4   1   -0.41    0.52
   4  -4   0    8.24    0.77
   4   4   0    8.03    1.01
   4   4   0    9.75    1.17
   4   4   0    9.14    0.72
  -4   4   0    9.38    0.97
  -4   4   0    8.11    0.98
   4   4   1  179.05    4.49
   4   4   1  182.73    5.37
   4  -4   1  183.80    5.56
   4   4   1  181.82    5.43
   4  -4   1  189.67    4.10
  -4   4  -1  184.85    5.56
   4  -4   2    2.38    0.72
   4   4   2    4.14    0.73
   4  -4   2    1.64    0.37
   4   4   2    2.50    0.53
  -4   4  -2    1.81    0.74
  -4  -4  -2    3.37    0.71
   4   4   3  291.10    7.14
   4  -4   3  292.95    8.42
   4   4   3  291.56    8.61
   4  -4   3  293.93    4.41
  -4   4  -3  294.93    8.62
  -4  -4  -3  288.67    7.14
   4   4   4   -0.04    0.59
   4  -4   4    0.30    0.18
   4  -4   4    1.67    0.87
   4   4   4    0.19    0.54
  -4   4  -4    0.05    0.73
   4   4   5   27.83    1.87
   4  -4   5   29.48    2.15
   4  -4   5   26.64    0.81
   4   4   5   28.79    2.04
  -4  -4  -5   29.84    1.60
  -4   4  -5   31.91    2.19
   4  -4   6    3.58    1.58
   4   4   6    5.01    1.17
   4   4   6    5.08    1.05
  -4  -4  -6    5.15    0.74
  -4   4  -6    4.64    1.38
   4  -4   7   -0.20    1.16
   4   4   7    1.44    1.03
   4   4   7    1.08    0.99
  -4   4  -7   -0.59    1.06
  -4   4  -7    0.37    0.30
  -4  -4  -7    1.77    0.54
   4   4   8    5.34    1.20
   4  -4   8    2.14    2.07
   4   4   8    2.77    1.48
  -4   4  -8    5.80    1.53
  -4   4  -8    3.00    0.51
  -4  -4  -8    5.08    0.74
   4  -4   9   34.33    4.13
   4   4   9   38.83    3.26
  -4  -4  -9   33.12    1.88
  -4  -4  -9   39.30    3.41
  -4   4  -9   38.85    3.26
  -4   4  -9   34.50    1.66
   4   4  10    0.41    1.56
   4  -4  10    0.90    1.66
  -4   4 -10    1.12    0.63
  -4   4 -10    2.29    1.51
  -4  -4 -10    3.12    1.51
  -4  -4 -10    1.42    0.62
   4   4  11   20.53    2.62
   4  -4  11   17.92    3.49
  -4  -4 -11   15.75    1.31
  -4   4 -11   22.51    2.78
  -4  -4 -11   17.94    2.87
   4  -4  12    2.91    2.48
   4   4  12    2.00    1.91
  -4  -4 -12    0.09    1.50
  -4   4 -12    4.01    1.74
   4   4  13   -0.84    1.89
   4  -4  13    2.50    2.21
  -4  -4 -13   -0.57    1.72
  -4   4 -13    2.28    1.64
   4  -4  14   -0.60    2.42
   4   4  14    5.08    1.96
  -4   4 -14   -0.54    1.34
  -4  -4 -14   -0.80    1.45
   4   4  15   -0.38    1.90
   4  -4  15    1.02    1.75
  -4  -4 -15    0.78    1.62
  -4   4 -15   -1.38    1.51
   4  -4  16   -1.06    3.26
   4   4  16    7.77    3.15
  -4  -4 -16    3.38    2.27
  -4   4 -16    5.68    2.59
   4   4  17   11.38    3.83
   4  -4  17    1.67    3.00
  -4  -4 -17    4.20    3.31
  -4   4 -17    3.82    2.98
   4   4  18   -2.48    2.72
   4  -4  18    0.15    2.75
  -4  -4 -18    1.19    2.31
   4   6 -18    2.55    2.89
   4  -6 -18   -0.63    2.85
  -4  -6  18    7.49    3.69
  -4   6  18    7.34    3.14
   4  -6 -17    2.25    2.60
   4   6 -17    0.95    2.66
  -4   6  17    3.92    2.90
  -4  -6  17    8.15    2.87
   4  -6 -16    0.97    2.62
   4   6 -16    5.72    2.25
  -4   6  16   -1.40    2.38
  -4  -6  16    0.18    2.83
   4  -6 -15    1.33    2.32
   4   6 -15   -1.19    2.01
  -4   6  15    3.63    1.84
  -4  -6  15   -0.28    2.23
   4   6 -14    3.14    2.22
   4  -6 -14    6.04    2.59
  -4   6  14    1.48    2.51
  -4  -6  14    1.79    3.01
   4  -6 -13    1.57    2.13
   4   6 -13    4.22    1.96
  -4   6  13    2.21    2.21
  -4  -6  13    1.79    2.51
   4  -6 -12    7.88    2.07
   4   6 -12    8.95    2.37
  -4   6  12    7.88    2.48
  -4  -6  12    5.51    2.90
   4  -6 -11   69.03    5.40
   4   6 -11   70.22    3.19
   4   6 -11   68.12    5.26
  -4   6  11   77.66    5.20
  -4  -6  11   79.21    5.82
   4  -6 -10   37.17    3.76
   4   6 -10   33.10    1.92
   4   6 -10   33.03    3.48
  -4   6  10   34.55    3.29
  -4  -6  10   38.52    4.28
   4  -6  -9   16.64    2.69
   4   6  -9   16.45    2.57
   4   6  -9   15.40    1.38
  -4   6   9   18.15    2.29
  -4  -6   9   18.95    2.60
   4   6  -8   -0.33    0.47
   4  -6  -8   -0.62    1.18
  -4   6   8    0.45    0.92
  -4  -6   8    0.09    1.41
   4   6  -7   20.79    2.44
   4  -6  -7   25.41    2.64
   4   6  -7   17.76    1.23
  -4   6   7   24.08    2.30
  -4  -6   7   23.33    2.71
   4  -6  -6   40.85    3.07
   4   6  -6   35.62    2.95
   4   6  -6   37.79    1.80
  -4   6   6   36.39    1.35
  -4   6   6   44.15    3.22
  -4  -6   6   38.97    2.74
   4   6  -5  152.09    4.30
   4  -6  -5  157.30    6.38
   4   6  -5  162.67    6.60
  -4   6   5  153.78    4.00
  -4   6   5  160.85    6.52
  -4  -6   5  152.67    6.00
   4  -6  -4  124.05    5.14
   4   6  -4  125.83    3.94
   4   6  -4  123.97    5.36
  -4   6   4  119.95    5.23
  -4   6   4  128.61    3.84
  -4  -6   4  128.56    4.95
   4  -6  -3  126.55    4.93
   4   6  -3  138.88    4.42
   4   6  -3  130.18    5.57
  -4   6   3  135.90    4.26
  -4   6   3  133.39    5.55
  -4  -6   3  133.95    5.00
   4  -6  -2   42.34    2.36
   4   6  -2   42.71    2.18
   4   6  -2   38.88    2.55
  -4   6   2   38.60    2.63
  -4   6   2   41.66    2.17
  -4  -6   2   39.57    2.35
   4   6  -1    4.06    0.85
   4  -6  -1    2.30    0.84
   4   6  -1    1.95    1.13
   4   6  -1    2.99    0.73
  -4   6   1    2.30    0.84
  -4   6   1    2.70    0.90
   4  -6   0   11.36    1.08
   4   6   0   11.30    1.29
   4   6   0   11.21    1.25
   4   6   0   10.43    1.61
  -4   6   0    9.77    1.36
  -4   6   0    9.33    1.47
   4  -6   1   17.23    1.07
   4   6   1   20.51    1.90
   4   6   1   22.71    1.67
  -4   6  -1   19.48    1.80
   4  -6   2   25.71    2.09
   4  -6   2   27.09    1.17
   4   6   2   25.50    1.86
   4   6   2   27.25    2.19
   4   6   2   27.00    1.94
  -4   6  -2   28.30    2.29
   4  -6   3   70.23    1.58
   4  -6   3   70.78    3.97
   4   6   3   70.25    3.52
   4   6   3   74.29    3.40
  -4   6  -3   72.15    3.73
  -4  -6  -3   73.01    3.27
   4  -6   4   29.40    2.63
   4   6   4   25.54    2.20
   4   6   4   28.07    2.13
  -4  -6  -4   27.97    1.90
  -4   6  -4   27.70    2.55
   4   6   5   44.52    2.86
   4   6   5   41.73    2.89
   4  -6   5   39.95    3.05
  -4   6  -5   44.74    3.35
  -4  -6  -5   41.58    2.25
   4   6   6    6.16    1.36
   4   6   6    6.06    1.42
   4  -6   6    6.47    1.67
  -4   6  -6    2.99    1.64
  -4  -6  -6    4.66    0.84
   4  -6   7    4.34    1.71
   4   6   7    2.68    1.20
   4   6   7    4.89    1.26
  -4   6  -7    5.68    1.61
  -4  -6  -7    2.76    0.76
   4   6   8    4.09    1.37
   4  -6   8    5.51    2.31
  -4   6  -8    6.09    1.94
  -4  -6  -8    5.92    1.57
  -4  -6  -8    5.57    0.80
   4  -6   9   23.19    3.66
   4   6   9   20.63    2.71
  -4   6  -9   24.68    2.84
  -4  -6  -9   19.38    1.43
  -4  -6  -9   19.94    2.98
   4   6  10   10.32    2.19
   4  -6  10   15.99    3.29
  -4   6 -10   12.79    2.74
  -4  -6 -10   11.47    2.21
   4  -6  11   18.34    3.82
   4   6  11   12.66    2.86
  -4   6 -11   14.29    2.57
  -4  -6 -11   15.73    2.95
   4  -6  12    1.72    2.64
   4   6  12   -1.44    2.03
  -4  -6 -12    4.55    1.60
   4  -6  13    5.78    2.59
   4   6  13    4.67    2.12
  -4   6 -13    5.00    2.48
   4   6  14    3.40    2.39
   4  -6  14    3.11    2.43
  -4   6 -14    0.86    1.83
  -4  -6 -14   -1.07    2.26
   4  -6  15   -0.03    2.75
   4   6  15    1.89    2.53
  -4   6 -15    2.23    2.26
  -4  -6 -15   -0.13    2.27
   4  -6  16    9.86    3.53
   4   6  16    0.41    2.90
  -4   6 -16    0.17    2.57
  -4  -6 -16   -0.16    2.31
   4   6  17    5.53    3.78
  -4   6 -17    1.34    3.40
  -4  -6 -17    8.93    3.17
   4   8 -16    1.08    2.65
   4  -8 -16    1.38    2.87
  -4   8  16    1.20    2.83
  -4  -8  16    2.15    3.55
   4   8 -15    7.39    2.76
   4  -8 -15   -0.18    2.71
  -4  -8  15    1.93    3.36
   4  -8 -14   -0.15    2.75
   4   8 -14    1.58    2.50
  -4   8  14    6.39    2.30
  -4  -8  14    3.95    2.87
   4   8 -13    1.51    1.78
   4  -8 -13    0.38    2.02
  -4   8  13   -0.10    1.62
  -4  -8  13   -0.32    2.20
   4   8 -12   29.44    4.12
   4  -8 -12   25.31    4.23
  -4   8  12   34.10    4.32
  -4  -8  12   32.40    4.77
   4   8 -11    4.67    1.74
   4  -8 -11   -1.04    1.45
  -4   8  11   -1.75    1.47
  -4  -8  11    1.53    2.03
   4   8 -10    4.15    2.32
   4  -8 -10    5.94    2.36
  -4   8  10    6.52    1.93
  -4  -8  10   11.18    2.82
   4  -8  -9    2.25    1.89
   4   8  -9    4.05    1.87
  -4   8   9    1.46    1.48
  -4  -8   9    0.12    2.00
   4  -8  -8   39.94    3.51
   4   8  -8   37.38    3.47
  -4   8   8   37.49    3.45
  -4  -8   8   38.61    4.10
   4   8  -7    2.29    1.47
   4  -8  -7    0.60    1.48
  -4  -8   7    1.26    1.67
  -4   8   7   -0.75    1.46
   4   8  -6   47.99    2.16
   4  -8  -6   53.99    4.02
   4   8  -6   55.75    4.24
  -4   8   6   48.03    3.76
  -4   8   6   52.27    2.31
  -4  -8   6   51.72    4.02
   4  -8  -5    4.77    1.38
   4   8  -5    0.23    0.54
   4   8  -5    0.09    1.09
  -4   8   5    3.15    1.16
  -4  -8   5    3.22    1.44
   4  -8  -4   28.88    2.70
   4   8  -4   29.78    1.78
   4   8  -4   29.65    2.99
  -4   8   4   28.47    2.70
  -4   8   4   32.54    1.93
  -4  -8   4   29.10    2.61
   4  -8  -3    1.85    1.13
   4   8  -3    2.30    1.41
   4   8  -3    1.48    0.68
  -4   8   3    2.25    0.93
  -4   8   3   -0.92    1.30
  -4  -8   3    1.87    1.32
   4  -8  -2   15.57    1.73
   4   8  -2   17.20    1.67
   4   8  -2   15.80    2.28
  -4   8   2   16.46    1.70
  -4   8   2   19.03    2.02
  -4  -8   2   16.25    2.12
   4  -8  -1    3.56    0.97
   4   8  -1   -0.05    1.26
   4   8  -1    1.24    0.92
  -4   8   1    1.93    1.10
  -4  -8   1   -0.36    1.14
   4  -8   0   18.05    1.53
   4   8   0   21.15    2.19
   4   8   0   22.32    1.97
   4   8   0   21.14    2.33
  -4   8   0   21.09    2.25
  -4   8   0   25.33    2.58
   4  -8   1   14.76    2.22
   4   8   1   11.48    1.78
   4  -8   1   12.26    1.16
   4   8   1   13.17    2.08
   4   8   1   11.52    1.75
  -4   8  -1   15.12    2.10
   4  -8   2   99.01    5.70
   4  -8   2   98.00    3.15
   4   8   2   99.69    5.08
   4   8   2  106.34    5.16
   4   8   2  102.50    4.96
  -4   8  -2  111.18    5.82
   4   8   3    0.27    1.19
   4  -8   3    2.66    1.24
   4   8   3    2.22    0.94
   4   8   3    1.04    1.05
  -4   8  -3   -0.60    1.06
   4   8   4   71.06    3.98
   4   8   4   67.68    4.18
   4  -8   4   66.10    4.57
  -4   8  -4   74.41    4.83
  -4  -8  -4   73.70    3.83
   4   8   5    0.85    1.03
   4   8   5    2.24    1.15
  -4   8  -5    2.76    1.41
  -4  -8  -5   -0.76    0.72
   4   8   6    0.66    1.49
   4  -8   6    2.84    2.04
  -4   8  -6    4.29    1.84
  -4  -8  -6    0.01    1.63
  -4  -8  -6    4.19    0.93
   4  -8   7   -0.96    1.59
   4   8   7   -1.53    1.21
  -4  -8  -7   -0.50    0.58
  -4   8  -7   -1.68    1.47
  -4  -8  -7    4.66    1.35
   4  -8   8    6.22    2.31
   4   8   8    9.16    2.16
  -4   8  -8    8.04    2.06
  -4  -8  -8    7.11    2.33
   4  -8   9   -0.20    1.28
   4   8   9   -0.20    1.21
  -4   8  -9    0.22    1.10
  -4  -8  -9    0.18    1.27
   4   8  10   12.92    3.05
   4  -8  10   22.29    3.84
  -4   8 -10   16.11    2.84
  -4  -8 -10   15.73    3.18
   4   8  11    0.53    1.56
   4  -8  11    1.12    2.34
  -4   8 -11    0.00    2.03
  -4  -8 -11    1.04    1.96
   4  -8  12    9.88    3.76
   4   8  12    6.77    3.22
  -4   8 -12   12.00    3.19
  -4  -8 -12    9.44    2.87
   4   8  13    1.43    2.41
  -4   8 -13    1.74    2.46
  -4  -8 -13    1.57    2.37
   4  -8  14   -0.68    2.61
   4   8  14    0.87    2.70
  -4   8 -14   -0.64    2.79
  -4  -8 -14    6.98    2.59
   4  -8  15   -0.90    2.42
   4   8  15   -0.32    2.27
  -4   8 -15   -1.43    2.50
  -4  -8 -15   -0.86    2.51
  -4 -10  14    1.55    2.64
  -4  10  14    1.94    2.93
   4  10 -13   -1.70    1.91
  -4  10  13   -0.11    2.64
  -4 -10  13   -0.84    2.36
   4  10 -12   14.99    3.94
   4 -10 -12   18.42    4.11
  -4  10  12   17.83    3.52
  -4 -10  12   12.27    4.39
   4 -10 -11    7.81    3.45
   4  10 -11   15.67    3.45
  -4 -10  11    9.54    4.02
  -4  10  11   12.49    3.43
   4  10 -10   22.07    4.03
   4 -10 -10   25.25    4.00
  -4 -10  10   26.41    4.06
  -4  10  10   19.46    3.82
   4 -10  -9   10.07    3.16
   4  10  -9   11.93    2.69
  -4 -10   9   15.72    3.44
  -4  10   9   12.24    2.59
   4  10  -8    3.25    2.33
   4 -10  -8    6.12    2.43
  -4  10   8    4.39    2.31
  -4 -10   8    3.51    2.64
   4 -10  -7    5.49    1.98
   4  10  -7   -1.04    1.68
  -4 -10   7    7.21    2.16
  -4  10   7    1.74    1.63
   4  10  -6   50.53    4.83
   4 -10  -6   50.85    4.06
  -4 -10   6   50.14    4.68
  -4  10   6   53.59    4.46
   4  10  -5   34.96    3.57
   4 -10  -5   38.74    3.73
  -4 -10   5   38.14    3.94
  -4  10   5   39.00    2.59
  -4  10   5   39.28    3.64
   4  10  -4   86.73    5.84
   4 -10  -4   75.78    4.82
   4  10  -4   62.62    3.18
  -4 -10   4   78.88    5.38
  -4  10   4   71.47    5.40
  -4  10   4   64.95    3.85
   4  10  -3   25.90    3.07
   4 -10  -3   27.11    2.80
   4  10  -3   26.75    2.11
  -4 -10   3   28.51    3.21
  -4  10   3   23.44    2.33
  -4  10   3   21.26    3.20
   4  10  -2   11.92    2.33
   4  10  -2   14.06    1.82
   4 -10  -2   14.95    2.15
  -4 -10   2   21.71    2.66
  -4  10   2   18.26    2.45
  -4  10   2   15.50    2.30
   4  10  -1   -0.06    1.14
   4  10  -1    6.24    1.86
   4 -10  -1    4.96    1.37
  -4 -10   1    3.10    1.41
  -4  10   1    5.99    1.90
  -4  10   1    4.01    1.55
   4  10   0    1.96    1.36
   4  10   0    3.56    1.39
   4  10   0    4.99    1.76
   4 -10   0    1.96    0.98
  -4  10   0    3.84    1.51
  -4  10   0    5.02    1.70
   4  10   1   15.94    2.21
   4  10   1   15.51    2.53
   4  10   1   14.85    2.73
   4 -10   1   18.58    2.83
  -4  10  -1   13.71    2.49
   4  10   2   35.60    3.26
   4  10   2   42.83    3.64
   4 -10   2   42.73    3.83
  -4  10  -2   43.95    4.06
   4  10   3   28.05    2.99
   4  10   3   34.40    3.28
   4 -10   3   37.50    3.96
  -4 -10  -3   31.14    3.40
  -4  10  -3   30.04    3.63
   4  10   4    9.32    2.34
   4 -10   4   12.25    2.83
  -4 -10  -4   13.28    2.51
  -4  10  -4   13.55    2.75
   4  10   5   -0.46    1.41
  -4 -10  -5    1.80    1.52
  -4  10  -5    1.58    1.67
  -4 -10  -5   -0.03    1.04
   4  10   6    9.79    2.45
   4 -10   6    7.66    2.82
  -4 -10  -6   11.76    1.62
  -4 -10  -6   15.30    2.67
  -4  10  -6    6.95    2.79
   4  10   7    2.39    2.06
   4 -10   7    3.81    2.55
  -4 -10  -7    5.73    1.93
  -4  10  -7    4.67    2.43
   4 -10   8    9.28    3.27
   4  10   8    5.74    2.52
  -4  10  -8    7.80    2.94
  -4 -10  -8   11.59    2.86
   4  10   9    4.89    2.15
   4 -10   9    4.90    2.61
  -4 -10  -9    5.33    2.62
  -4  10  -9    9.10    2.48
   4  10  10    7.76    2.62
   4 -10  10   16.78    3.99
  -4 -10 -10   10.16    2.76
  -4  10 -10   10.12    3.53
   4  10  11    8.57    3.10
   4 -10  11    6.48    3.04
  -4  10 -11   10.49    3.31
  -4 -10 -11    8.30    3.16
   4  10  12    2.61    2.67
   4 -10  12    5.34    3.20
  -4 -10 -12   -0.98    2.79
  -4  10 -12    1.85    2.87
   4  10  13    2.16    2.84
  -4 -10 -13    0.96    2.54
  -4  10 -13    0.90    2.75
   4 -12 -11    9.53    4.01
   4  12 -11   12.76    3.97
  -4  12  11   14.96    4.03
  -4 -12  11   11.84    4.52
   4  12 -10    0.05    2.41
   4 -12 -10   -0.04    2.06
  -4  12  10    0.95    2.48
  -4 -12  10    1.77    2.29
   4 -12  -9    5.22    2.75
   4  12  -9    4.75    3.24
  -4 -12   9    9.98    3.53
  -4  12   9   11.21    3.33
   4 -12  -8    0.75    2.07
   4  12  -8    0.95    2.09
  -4 -12   8    6.59    2.72
  -4  12   8    2.23    2.53
   4 -12  -7    7.76    2.76
   4  12  -7    5.35    2.90
  -4  12   7    2.06    2.26
  -4 -12   7    6.23    2.94
   4 -12  -6   -1.25    2.08
   4  12  -6    0.78    2.35
  -4  12   6    3.49    2.23
  -4 -12   6    3.27    2.48
   4 -12  -5   38.71    4.57
   4  12  -5   42.04    5.31
  -4 -12   5   43.61    4.61
  -4  12   5   48.43    5.06
   4 -12  -4    1.05    2.05
   4  12  -4    5.95    2.18
  -4  12   4    1.75    2.43
  -4 -12   4    6.62    2.20
   4 -12  -3   30.51    3.69
   4  12  -3   31.82    4.45
  -4  12   3   30.23    3.40
  -4  12   3   35.70    4.42
  -4 -12   3   40.02    4.41
   4 -12  -2    3.06    1.76
   4  12  -2    0.08    2.43
  -4  12   2    4.06    1.80
  -4  12   2    6.02    2.13
  -4 -12   2    7.88    2.43
   4  12  -1    1.95    2.00
  -4  12   1    0.78    1.72
  -4 -12   1   -0.28    1.26
  -4  12   1    3.97    1.72
  -4 -12   1   -0.50    1.88
   4 -12   0    3.20    1.97
   4  12   0    5.84    2.40
  -4  12   0    2.67    2.12
  -4 -12   0   -0.44    2.21
  -4 -12   0    3.62    1.55
   4 -12   1   20.00    3.63
   4  12   1   18.05    3.50
   4  12   1   16.83    2.88
  -4  12  -1   19.20    3.44
  -4 -12  -1   18.80    2.75
   4 -12   2    5.78    2.20
   4  12   2    4.70    2.42
   4  12   2    4.11    2.51
  -4  12  -2    8.08    2.66
  -4 -12  -2    5.67    2.17
   4 -12   3   40.87    5.11
   4  12   3   35.15    4.08
   4  12   3   46.90    4.77
  -4  12  -3   46.27    4.94
  -4 -12  -3   40.58    4.28
   4 -12   4    3.82    2.28
   4  12   4    0.03    1.85
  -4  12  -4   -0.24    2.11
   4  12   5    4.80    2.63
   4 -12   5    9.20    2.55
  -4  12  -5    4.66    2.55
  -4 -12  -5    9.15    2.66
   4 -12   6    5.36    2.40
   4  12   6   -0.12    2.05
  -4  12  -6   -1.06    2.32
  -4 -12  -6    0.54    2.01
   4 -12   7    4.59    2.40
   4  12   7    1.24    2.62
  -4  12  -7    0.27    2.26
  -4 -12  -7    5.28    2.12
   4  12   8   -0.14    1.98
  -4  12  -8    0.30    1.77
  -4 -12  -8   -0.74    1.94
   4  12   9    9.60    2.90
   4 -12   9   11.81    3.58
  -4  12  -9    8.53    3.81
  -4 -12  -9   12.37    3.73
   4 -12  10   -0.66    2.83
   4  12  10    0.06    1.89
  -4 -12 -10    2.56    1.98
  -4  12 -10   -0.67    2.15
   4  14  -6    6.72    2.80
  -4 -14   6    1.76    3.30
  -4  14   6   -0.23    2.44
   4  14  -5   16.26    4.01
  -4  14   5   18.67    4.36
  -4 -14   5   15.68    4.56
   4  14  -4   16.72    4.52
  -4  14   4   18.58    3.90
  -4 -14   4   18.76    3.85
   4  14  -3   25.84    5.23
  -4 -14   3   38.20    5.38
  -4  14   3   28.34    5.18
   4  14  -2    0.51    2.77
  -4 -14   2    2.93    2.22
   4 -14  -1    0.81    2.58
   4  14  -1    2.35    2.84
  -4 -14   1    0.29    2.59
   4 -14   0    4.31    2.68
   4  14   0    1.44    2.75
  -4 -14   0   -0.95    2.44
  -4  14   0    0.47    2.43
   4 -14   1    6.26    3.64
   4  14   1    8.88    3.53
  -4 -14  -1    8.82    3.56
  -4  14  -1    8.99    3.56
   4 -14   2    6.74    2.84
  -4  14  -2    6.02    3.27
  -4 -14  -2    2.95    2.56
   4 -14   3   13.24    3.72
   4  14   3   16.26    3.48
  -4  14  -3   11.91    4.05
   4  14   4    1.50    2.35
  -4  14  -4    4.25    2.91
   4  14   5    8.44    3.23
   4 -14   5    6.05    3.51
  -4 -14  -5    2.81    2.96
  -4  14  -5   -2.01    3.31
   5  -1 -20    1.02    3.16
  -5   1  20    2.17    2.57
  -5  -1  20    0.10    2.50
   5   1 -19    0.10    2.21
   5  -1 -19   -0.25    3.08
  -5  -1  19    0.59    2.80
  -5   1  19    3.42    2.34
   5  -1 -18    1.20    2.95
   5   1 -18    0.71    2.43
  -5   1  18    4.95    2.95
  -5  -1  18    1.88    2.38
   5  -1 -17    2.17    2.46
   5   1 -17   -0.11    2.07
  -5   1  17    2.80    2.46
  -5  -1  17   -0.33    2.40
   5  -1 -16    9.00    2.82
   5   1 -16    3.54    1.54
   5   1 -16    5.50    2.42
  -5   1  16    0.38    2.72
  -5  -1  16    2.22    2.78
   5  -1 -15    8.57    3.05
   5   1 -15    8.89    2.62
   5   1 -15    9.48    1.79
  -5   1  15    6.88    2.49
  -5  -1  15   10.41    2.77
   5   1 -14    9.14    1.65
   5   1 -14   14.45    2.68
   5  -1 -14    7.31    2.75
  -5   1  14    7.93    2.77
  -5  -1  14    6.18    2.97
   5  -1 -13   13.59    1.37
   5   1 -13   16.57    1.75
   5  -1 -13   17.25    2.94
   5   1 -13   15.61    2.73
  -5   1  13   16.07    2.89
  -5  -1  13    7.66    3.17
   5  -1 -12   56.57    2.50
   5  -1 -12   59.76    4.63
   5   1 -12   55.12    3.21
   5   1 -12   67.25    4.56
  -5   1  12   60.07    4.69
  -5  -1  12   62.60    5.24
   5  -1 -11    1.16    0.51
   5   1 -11    0.88    1.19
   5   1 -11   -0.06    0.79
   5  -1 -11   -1.55    1.37
  -5   1  11   -0.41    1.35
  -5  -1  11   -0.67    1.62
   5  -1 -10   39.31    3.18
   5   1 -10   36.01    2.99
   5  -1 -10   34.73    1.75
   5   1 -10   36.03    2.30
  -5  -1  10   40.71    3.25
  -5   1  10   36.01    3.23
   5  -1  -9    5.77    0.72
   5  -1  -9    6.82    1.77
   5   1  -9    4.43    1.47
   5   1  -9    5.24    1.04
  -5   1   9    5.89    1.60
  -5  -1   9    7.50    1.52
   5   1  -8    1.88    0.80
   5   1  -8    2.91    1.13
   5  -1  -8    2.42    1.07
  -5   1   8    2.67    1.07
  -5  -1   8    3.59    1.01
  -5   1   8    0.97    0.45
   5   1  -7    7.34    1.06
   5   1  -7    8.21    1.39
   5  -1  -7    6.04    1.53
  -5   1   7    6.46    0.66
  -5   1   7    5.21    1.08
  -5  -1   7    7.98    1.43
   5   1  -6  542.76   12.99
   5   1  -6  588.26   12.85
   5  -1  -6  564.08   13.94
  -5   1   6  560.32   10.04
  -5   1   6  560.48   12.95
  -5  -1   6  556.20   12.54
   5  -1  -5   84.90    3.61
   5   1  -5   87.80    3.40
   5   1  -5   86.91    3.17
  -5   1   5   86.49    2.55
  -5   1   5   90.94    3.18
  -5  -1   5   87.38    3.11
   5  -1  -4  375.44    9.35
   5   1  -4  382.26    8.50
   5   1  -4  400.29    9.11
  -5  -1   4  406.82    7.71
  -5   1   4  401.86    7.52
  -5   1   4  405.49    8.14
   5  -1  -3   19.39    1.75
   5   1  -3   21.57    1.55
  -5   1   3   23.16    1.09
  -5  -1   3   22.11    1.29
  -5  -1   3   24.73    1.06
  -5   1   3   23.77    1.25
   5  -1  -2   19.26    1.32
   5   1  -2   17.14    1.18
  -5   1   2   17.43    1.15
  -5   1   2   18.61    0.86
  -5  -1   2   18.43    1.28
  -5  -1   2   18.30    0.64
   5  -1  -1    2.90    0.79
   5   1  -1    3.20    0.63
  -5   1   1    3.58    0.37
  -5   1   1    1.98    0.71
  -5  -1   1    2.86    0.79
   5  -1   0   70.59    2.41
   5   1   0   67.95    2.43
   5  -1   0   64.66    1.68
  -5   1   0   67.40    2.58
  -5  -1   0   67.83    2.54
   5  -1   1    7.69    0.62
   5  -1   1    9.04    0.75
   5   1   1    7.11    0.37
   5   1   1    8.35    0.85
  -5   1  -1    7.13    0.98
  -5  -1  -1    8.67    0.88
  -5  -1  -1    7.35    0.41
   5  -1   2  419.21    7.61
   5  -1   2  408.83    7.87
   5   1   2  411.54    6.84
   5   1   2  421.79    9.08
  -5   1  -2  418.60    9.34
  -5  -1  -2  407.31    8.82
   5  -1   3   67.22    2.27
   5  -1   3   67.42    2.57
   5   1   3   68.20    2.39
   5   1   3   74.54    2.86
  -5   1  -3   71.28    2.89
  -5  -1  -3   70.99    2.67
   5  -1   4    2.58    0.90
   5   1   4    2.06    0.78
   5  -1   4    1.53    0.60
   5   1   4    1.24    0.68
  -5  -1  -4    1.61    0.74
  -5   1  -4    3.53    0.84
   5  -1   5    2.90    0.66
   5   1   5    3.53    1.00
   5   1   5    2.95    0.72
   5  -1   5    3.87    1.09
  -5   1  -5    2.88    0.78
  -5  -1  -5    0.84    0.80
   5  -1   6   11.21    1.72
   5   1   6    9.89    1.62
   5   1   6   10.48    1.19
   5  -1   6   11.32    1.16
  -5   1  -6    9.23    1.21
  -5  -1  -6   11.32    1.25
   5  -1   7    6.42    1.68
   5  -1   7    4.60    0.83
   5   1   7    6.15    1.32
   5   1   7    5.05    1.00
  -5   1  -7    4.80    1.00
  -5  -1  -7    6.20    1.08
   5  -1   8   43.70    2.44
   5   1   8   43.54    3.23
   5   1   8   40.62    2.86
   5  -1   8   45.24    3.87
  -5   1  -8   45.22    2.93
  -5  -1  -8   37.87    2.49
   5  -1   9    1.12    2.06
   5   1   9    2.91    1.07
   5   1   9    4.21    1.60
  -5   1  -9    3.20    1.30
  -5  -1  -9    1.69    1.01
   5  -1  10   55.55    4.45
   5   1  10   58.22    4.58
  -5   1 -10   50.66    3.32
  -5   1 -10   50.73    3.66
  -5  -1 -10   55.13    3.10
  -5  -1 -10   55.41    3.59
   5  -1  11    1.69    2.03
   5   1  11    0.63    1.91
  -5   1 -11    0.99    1.37
  -5   1 -11    1.35    1.12
  -5  -1 -11    1.12    1.06
  -5  -1 -11    0.90    1.39
   5   1  12    1.06    2.42
   5  -1  12    3.61    2.41
  -5   1 -12    4.30    1.52
  -5   1 -12    3.38    1.44
  -5  -1 -12    3.34    1.29
  -5  -1 -12    1.84    1.68
   5  -1  13    4.89    2.82
   5   1  13   10.72    3.20
  -5   1 -13    8.24    1.76
  -5  -1 -13    5.97    1.70
  -5  -1 -13    5.84    1.98
  -5   1 -13    6.46    1.79
   5  -1  14    8.32    3.03
   5   1  14    6.77    2.19
  -5   1 -14    3.33    1.76
  -5  -1 -14    3.31    1.37
  -5  -1 -14    7.18    2.18
  -5   1 -14    0.33    1.82
   5   1  15   -0.65    2.14
  -5  -1 -15    1.47    1.04
  -5  -1 -15   -0.05    1.58
  -5   1 -15    0.82    1.49
  -5   1 -15   -1.76    1.50
   5  -1  16   10.46    4.20
   5   1  16   12.23    3.83
  -5   1 -16    2.89    2.61
  -5   1 -16    8.77    2.46
  -5  -1 -16   11.06    2.98
   5  -1  17   11.41    4.12
   5   1  17    0.01    2.79
  -5  -1 -17    7.72    2.86
   5  -1  18    1.03    2.69
   5   1  18    3.19    3.16
  -5  -1 -18    0.34    1.91
   5  -3 -19    3.15    3.75
  -5  -3  19    3.85    3.80
  -5   3  19    3.23    3.18
   5  -3 -18    1.47    2.28
  -5   3  18    3.46    2.82
  -5  -3  18    2.37    3.38
   5   3 -17    1.33    2.02
   5   3 -17    2.81    1.73
   5  -3 -17   10.93    2.32
  -5  -3  17   -0.09    2.52
  -5   3  17   -2.24    2.69
   5   3 -16    0.04    1.67
   5   3 -16    4.45    2.03
   5  -3 -16    1.40    1.98
  -5  -3  16    6.88    2.38
  -5   3  16    0.67    1.93
   5   3 -15   10.77    2.10
   5   3 -15    3.99    2.23
   5  -3 -15    4.96    2.24
  -5  -3  15    5.10    2.57
  -5   3  15    6.98    2.61
   5   3 -14    9.78    2.10
   5   3 -14   10.89    2.16
   5  -3 -14   12.24    2.87
  -5  -3  14   11.05    3.14
  -5   3  14    5.46    2.24
   5   3 -13   14.74    2.33
   5  -3 -13   16.99    3.01
   5   3 -13   13.94    2.50
  -5  -3  13   17.63    3.27
  -5   3  13   18.79    2.69
   5   3 -12    4.71    1.70
   5   3 -12    4.25    1.50
   5  -3 -12    1.72    2.04
  -5  -3  12    6.69    1.96
  -5   3  12    4.78    1.94
   5   3 -11   34.54    2.77
   5   3 -11   32.28    2.74
   5  -3 -11   35.57    3.26
  -5  -3  11   31.02    3.26
  -5   3  11   34.73    3.45
   5   3 -10   -0.93    0.76
   5   3 -10    1.63    0.81
  -5  -3  10    0.07    1.25
  -5   3  10   -0.88    0.97
   5   3  -9    3.20    1.33
   5  -3  -9    2.31    1.28
   5   3  -9    3.48    1.30
  -5   3   9    4.98    1.44
  -5  -3   9    4.11    1.54
   5   3  -8   15.82    1.66
   5   3  -8   16.57    1.86
   5  -3  -8   18.16    2.22
  -5  -3   8   17.85    2.21
  -5   3   8   19.69    2.09
  -5   3   8   16.57    0.73
   5   3  -7  118.74    4.51
   5   3  -7  116.81    4.95
   5  -3  -7  121.33    5.47
  -5  -3   7  118.51    5.15
  -5   3   7  124.24    2.72
  -5   3   7  116.17    5.09
   5   3  -6   25.25    1.85
   5   3  -6   23.09    1.73
   5  -3  -6   29.93    2.18
  -5  -3   6   27.61    2.09
  -5   3   6   27.70    2.03
  -5   3   6   28.06    1.07
   5   3  -5  154.08    5.50
   5  -3  -5  152.37    5.50
   5   3  -5  148.43    4.63
  -5  -3   5  151.40    4.79
  -5   3   5  151.97    3.53
  -5   3   5  151.31    5.17
   5   3  -4    8.35    1.08
   5  -3  -4    4.45    1.03
   5   3  -4    5.24    0.85
  -5   3   4    4.84    0.57
  -5  -3   4    5.14    0.77
  -5   3   4    5.34    0.89
   5   3  -3   28.63    1.65
   5  -3  -3   30.33    2.05
   5   3  -3   30.55    2.09
  -5   3   3   33.75    1.41
  -5   3   3   30.44    1.73
  -5  -3   3   32.18    1.36
   5  -3  -2   13.50    1.27
   5   3  -2   14.36    1.06
   5   3  -2   11.90    1.15
  -5  -3   2   14.67    0.79
  -5   3   2   14.09    1.08
  -5   3   2   12.49    0.97
   5   3  -1   18.59    1.22
   5   3  -1   18.23    1.44
   5  -3  -1   20.98    1.47
  -5  -3   1   19.95    0.79
  -5   3   1   17.90    1.21
  -5   3   1   19.85    1.33
   5   3   0    8.17    0.89
   5   3   0    7.04    0.45
   5  -3   0    6.41    0.77
  -5  -3   0    8.04    1.04
  -5   3   0    5.58    0.92
  -5   3   0    4.71    0.82
   5   3   1   82.48    3.24
   5   3   1   84.53    2.09
   5  -3   1   76.86    2.89
   5  -3   1   85.50    2.54
  -5  -3  -1   85.80    3.27
  -5   3  -1   82.03    3.27
   5  -3   2   54.23    2.51
   5   3   2   56.77    1.82
   5  -3   2   59.80    1.87
   5   3   2   56.21    2.60
  -5  -3  -2   54.36    2.44
  -5   3  -2   58.49    2.64
   5   3   3   63.35    3.04
   5   3   3   64.81    2.29
   5  -3   3   69.44    2.85
   5  -3   3   69.46    1.96
  -5  -3  -3   68.74    2.77
  -5   3  -3   69.28    3.07
   5   3   4    4.07    0.79
   5   3   4    2.23    0.62
   5  -3   4    2.15    0.96
   5  -3   4    1.12    0.36
  -5  -3  -4    1.43    0.71
  -5   3  -4    2.10    0.97
   5   3   5    1.68    0.79
   5   3   5    2.91    1.06
   5  -3   5    1.71    0.42
   5  -3   5    2.17    1.18
  -5  -3  -5    0.79    0.76
  -5   3  -5    3.87    0.87
   5   3   6    4.69    1.13
   5   3   6    3.64    0.98
   5  -3   6    2.04    1.56
   5  -3   6    4.11    0.56
  -5  -3  -6    4.56    0.91
  -5   3  -6    3.53    1.25
   5   3   7   13.67    1.76
   5   3   7   12.94    1.78
   5  -3   7   12.67    0.92
   5  -3   7   13.79    2.33
  -5  -3  -7   13.66    1.25
  -5   3  -7   11.28    1.85
   5   3   8    6.92    1.32
   5   3   8    7.69    1.73
   5  -3   8    7.74    2.35
  -5  -3  -8    4.27    1.06
  -5   3  -8    7.59    1.37
   5   3   9   38.90    3.41
   5   3   9   35.56    3.25
   5  -3   9   40.94    4.01
  -5  -3  -9   33.10    2.17
  -5   3  -9   38.67    2.05
  -5   3  -9   40.42    3.37
   5   3  10    4.79    1.72
   5  -3  10    6.30    2.17
  -5  -3 -10    4.69    1.59
  -5  -3 -10    5.68    1.16
  -5   3 -10    5.04    0.96
  -5   3 -10    6.99    1.67
   5   3  11   15.56    2.36
   5  -3  11   12.44    3.22
  -5  -3 -11   12.98    2.21
  -5  -3 -11   12.41    1.54
  -5   3 -11   15.49    2.43
  -5   3 -11   13.17    1.46
   5   3  12    3.81    1.51
   5  -3  12   -1.94    1.80
  -5  -3 -12   -0.22    1.25
  -5  -3 -12    1.02    0.78
  -5   3 -12    0.78    1.20
  -5   3 -12    1.06    0.98
   5   3  13   -2.05    1.83
   5  -3  13   -0.22    1.83
  -5  -3 -13   -0.27    1.32
  -5   3 -13    0.04    1.59
   5   3  14   -0.53    1.84
   5  -3  14    3.22    2.55
  -5  -3 -14    2.71    1.94
  -5   3 -14    0.19    1.77
   5   3  15    8.81    3.20
   5  -3  15    3.93    2.71
  -5  -3 -15    1.51    2.73
  -5   3 -15    7.56    2.57
   5   3  16    1.68    2.56
   5  -3  16   -1.92    2.55
  -5  -3 -16   -1.44    2.14
  -5   3 -16    2.86    1.96
   5   3  17    6.36    3.25
   5  -3  17   -0.36    3.69
  -5  -3 -17    9.21    3.24
  -5   3 -17    3.46    2.89
   5   3  18    3.50    3.20
   5  -3  18    2.49    3.38
  -5  -3 -18    7.12    3.51
   5   5 -18    0.83    2.70
   5  -5 -18   13.89    3.78
  -5   5  18    5.63    2.80
   5   5 -17    1.67    2.59
   5  -5 -17    3.12    3.35
  -5  -5  17   10.50    2.94
  -5   5  17    5.42    2.64
   5   5 -16    0.49    1.75
   5  -5 -16    2.31    2.23
  -5  -5  16   -1.09    2.43
  -5   5  16    0.16    2.12
   5  -5 -15   -1.99    2.16
  -5  -5  15   -1.75    2.35
  -5   5  15    0.43    2.21
   5   5 -14   -0.53    1.56
   5   5 -14   -0.73    1.11
   5  -5 -14    3.25    1.94
  -5  -5  14   -0.50    1.71
  -5   5  14    4.35    1.65
   5   5 -13   37.50    3.95
   5   5 -13   39.99    3.01
   5  -5 -13   43.33    4.07
  -5  -5  13   41.93    5.15
  -5   5  13   33.78    4.40
   5   5 -12    7.07    1.81
   5   5 -12    9.70    1.50
   5  -5 -12   12.89    2.70
  -5  -5  12    7.84    2.97
  -5   5  12   11.08    2.56
   5   5 -11   19.44    2.00
   5   5 -11   24.31    2.51
   5  -5 -11   21.73    2.90
  -5  -5  11   21.32    3.65
  -5   5  11   28.54    2.84
   5  -5 -10    0.42    1.63
   5   5 -10    0.17    0.84
   5   5 -10    1.52    1.08
  -5  -5  10    4.23    1.82
  -5   5  10    1.71    1.19
   5  -5  -9   21.51    2.88
   5   5  -9   22.36    2.54
   5   5  -9   19.22    1.61
  -5  -5   9   25.40    3.08
  -5   5   9   22.00    2.36
   5  -5  -8   -0.02    1.05
   5   5  -8    1.34    0.87
   5   5  -8    0.38    0.66
  -5   5   8    0.78    0.94
  -5  -5   8    0.19    1.33
   5   5  -7  107.22    5.01
   5  -5  -7  105.87    5.40
   5   5  -7  113.73    4.00
  -5   5   7   98.42    2.16
  -5   5   7  115.35    5.31
  -5  -5   7  106.71    5.18
   5  -5  -6   22.20    2.29
   5   5  -6   20.41    1.51
   5   5  -6   16.56    2.11
  -5   5   6   16.71    0.93
  -5   5   6   23.84    1.94
  -5  -5   6   22.83    2.15
   5   5  -5  339.39   11.04
   5  -5  -5  343.86   10.63
   5   5  -5  344.86    8.54
  -5   5   5  353.01    6.99
  -5   5   5  340.17   10.69
  -5  -5   5  349.86    9.66
   5  -5  -4   20.69    1.91
   5   5  -4   19.28    1.43
   5   5  -4   16.02    1.90
  -5   5   4   16.83    1.08
  -5   5   4   16.19    1.56
  -5  -5   4   16.83    1.41
   5  -5  -3   76.68    3.59
   5   5  -3   77.30    3.73
   5   5  -3   69.31    2.82
  -5   5   3   73.83    3.52
  -5   5   3   74.01    2.76
  -5  -5   3   73.07    2.83
   5  -5  -2    4.50    1.11
   5   5  -2    3.80    0.82
   5   5  -2    3.12    1.19
  -5   5   2    3.03    0.79
  -5   5   2    1.99    0.83
  -5  -5   2    2.80    0.75
   5   5  -1    2.67    0.83
   5  -5  -1    2.60    0.89
   5   5  -1    4.25    1.10
  -5   5   1    1.86    0.91
  -5   5   1    3.30    0.86
  -5  -5   1    1.89    0.65
   5  -5   0    1.52    0.58
   5   5   0    0.06    0.61
   5   5   0   -0.10    0.86
   5   5   0   -0.01    0.56
  -5   5   0    1.99    0.64
  -5   5   0    0.35    0.67
   5  -5   1  346.04    7.29
   5  -5   1  340.71    9.86
   5   5   1  338.09    9.37
   5   5   1  354.38    9.76
   5   5   1  356.53    8.27
  -5   5  -1  350.24    9.85
   5   5   2   53.10    2.98
   5  -5   2   51.53    2.81
   5  -5   2   54.64    1.76
   5   5   2   52.31    2.29
  -5   5  -2   49.96    2.81
  -5  -5  -2   53.84    2.82
   5   5   3  161.34    6.17
   5  -5   3  144.48    3.09
   5  -5   3  149.98    5.80
   5   5   3  148.04    4.80
  -5   5  -3  152.65    5.94
  -5  -5  -3  147.80    5.18
   5  -5   4    1.64    0.26
   5  -5   4    2.36    1.22
   5   5   4    2.95    1.10
   5   5   4    2.11    0.85
  -5   5  -4    3.23    1.27
  -5  -5  -4    1.88    0.70
   5  -5   5    3.66    0.32
   5  -5   5    7.32    1.65
   5   5   5    3.95    1.08
   5   5   5    5.11    1.00
  -5   5  -5    3.47    1.16
  -5  -5  -5    4.88    0.88
   5  -5   6   11.24    2.18
   5   5   6    7.18    1.76
   5   5   6   11.34    1.57
  -5   5  -6   12.69    2.03
  -5  -5  -6    9.58    1.23
   5  -5   7  107.56    6.22
   5   5   7  107.42    5.82
   5   5   7  106.16    5.13
  -5  -5  -7  108.18    3.95
  -5   5  -7  106.42    5.56
   5  -5   8   13.08    2.88
   5   5   8   11.02    2.04
   5   5   8   14.28    2.11
  -5   5  -8   12.63    1.94
  -5  -5  -8   10.61    1.25
   5  -5   9   15.69    3.42
   5   5   9   14.04    2.53
  -5   5  -9   16.74    2.61
  -5  -5  -9   16.88    1.41
   5  -5  10    0.10    1.57
   5   5  10    1.17    1.49
  -5   5 -10    3.04    1.53
  -5  -5 -10    0.02    0.59
  -5  -5 -10    0.63    1.44
   5  -5  11    1.07    2.27
   5   5  11    2.81    1.74
  -5   5 -11    0.24    1.82
  -5  -5 -11    1.53    1.41
   5  -5  12   -0.23    1.60
   5   5  12    1.50    1.65
  -5   5 -12    0.20    1.59
  -5  -5 -12   -0.13    1.60
   5  -5  13    5.48    2.51
   5   5  13    4.43    2.47
  -5   5 -13    2.42    2.42
  -5  -5 -13    4.84    2.43
   5  -5  14    5.47    2.42
   5   5  14   -0.54    2.42
  -5   5 -14    1.06    2.39
  -5  -5 -14    1.43    2.30
   5  -5  15    8.04    3.34
   5   5  15    7.66    3.43
  -5   5 -15    8.35    3.14
  -5  -5 -15   10.72    3.53
   5   5  16   -0.50    2.51
  -5   5 -16   -0.13    2.36
  -5  -5 -16   -1.44    2.43
   5  -5  17    0.50    2.85
   5   5  17    0.32    3.31
  -5   5 -17    3.40    2.80
  -5  -5 -17    3.18    2.61
   5   7 -17   -0.38    1.99
   5  -7 -17   -0.62    2.12
  -5  -7  17    0.93    2.86
  -5   7  17   -2.51    2.50
   5   7 -16    0.40    1.98
   5  -7 -16    5.20    2.26
  -5  -7  16   -0.04    3.21
  -5   7  16    0.54    1.99
   5   7 -15    3.04    2.49
   5  -7 -15    2.43    2.75
  -5  -7  15    6.53    3.31
  -5   7  15    0.05    2.63
   5   7 -14    0.75    1.97
   5  -7 -14   -0.23    2.17
  -5  -7  14    0.99    2.45
  -5   7  14    1.06    2.13
   5   7 -13    8.11    2.21
   5  -7 -13    5.74    3.02
  -5  -7  13   11.26    3.32
  -5   7  13    5.87    2.82
   5   7 -12   18.16    3.30
   5  -7 -12   25.85    3.35
  -5  -7  12   27.18    3.94
  -5   7  12   23.28    3.32
   5   7 -11    7.29    2.23
   5  -7 -11    4.66    2.33
  -5  -7  11    5.60    2.60
  -5   7  11    4.03    2.29
   5   7 -10   28.41    3.50
   5  -7 -10   34.53    3.99
  -5  -7  10   29.25    3.90
  -5   7  10   29.57    3.88
   5   7  -9    0.44    0.54
   5   7  -9    0.02    1.02
   5  -7  -9   -1.27    1.33
  -5  -7   9    0.47    1.29
   5   7  -8    0.64    0.59
   5   7  -8   -0.66    1.29
   5  -7  -8    1.61    1.50
  -5  -7   8    0.16    1.58
  -5   7   8   -0.19    1.38
   5   7  -7   14.46    1.20
   5   7  -7   18.46    2.53
   5  -7  -7   13.66    2.43
  -5   7   7   15.37    2.44
  -5  -7   7   19.13    2.45
   5   7  -6  136.29    6.94
   5   7  -6  142.69    4.64
   5  -7  -6  159.35    7.24
  -5  -7   6  149.18    6.67
  -5   7   6  145.45    6.77
  -5   7   6  134.74    3.99
   5   7  -5   75.76    4.46
   5   7  -5   61.65    2.82
   5  -7  -5   61.30    4.12
  -5  -7   5   69.32    4.06
  -5   7   5   67.40    3.97
  -5   7   5   64.65    2.71
   5   7  -4  195.57    6.24
   5   7  -4  181.14    7.96
   5  -7  -4  184.20    7.34
  -5  -7   4  196.55    6.98
  -5   7   4  181.07    7.76
  -5   7   4  195.60    6.11
   5   7  -3   24.10    2.32
   5   7  -3   19.88    1.77
   5  -7  -3   23.26    2.25
  -5  -7   3   20.40    1.98
  -5   7   3   21.75    2.39
  -5   7   3   22.36    1.72
   5   7  -2    0.38    1.25
   5   7  -2    2.82    0.90
   5  -7  -2    1.43    1.13
  -5  -7   2    0.88    1.00
  -5   7   2    2.67    1.25
  -5   7   2    3.85    1.04
   5   7  -1    5.82    1.20
   5   7  -1    4.82    1.36
   5  -7  -1    4.22    1.14
  -5  -7   1    5.55    1.25
  -5   7   1    5.17    1.27
  -5   7   1    5.42    1.47
   5   7   0   61.78    3.46
   5   7   0   74.91    4.38
   5   7   0   65.07    3.39
   5  -7   0   68.53    2.99
  -5   7   0   58.27    3.60
  -5   7   0   66.76    3.77
   5   7   1   15.14    1.78
   5   7   1   16.15    1.88
   5   7   1   15.39    1.65
   5  -7   1   16.66    1.43
   5  -7   1   16.06    2.12
  -5   7  -1   15.67    1.99
   5   7   2   83.08    4.26
   5   7   2   90.93    4.69
   5   7   2   89.48    4.05
   5  -7   2   85.01    2.70
   5  -7   2   87.54    4.87
  -5   7  -2   76.37    4.54
   5   7   3    9.90    1.80
   5   7   3    7.76    1.40
   5  -7   3   10.61    1.73
   5  -7   3    9.33    0.61
  -5  -7  -3   13.33    1.62
  -5   7  -3   12.52    1.95
   5   7   4   11.51    1.96
   5   7   4   10.11    1.56
   5  -7   4   13.43    2.32
  -5  -7  -4   10.89    1.60
  -5   7  -4   10.72    2.07
   5   7   5    2.23    1.41
   5   7   5    1.97    1.16
   5  -7   5    0.97    1.69
  -5  -7  -5    1.84    0.99
  -5   7  -5    2.57    1.24
   5   7   6   -0.06    1.00
   5   7   6    0.27    1.05
   5  -7   6   -1.49    1.52
  -5  -7  -6    0.40    0.82
  -5   7  -6    1.67    1.04
   5   7   7    8.05    2.13
   5   7   7    5.20    1.78
   5  -7   7    6.81    2.06
  -5  -7  -7    6.36    1.27
  -5   7  -7    8.49    1.84
   5   7   8   20.49    2.73
   5  -7   8   21.48    3.01
  -5  -7  -8   24.31    2.70
  -5  -7  -8   17.08    1.48
  -5   7  -8   17.92    2.62
   5   7   9    6.05    2.05
   5  -7   9    8.54    2.70
  -5  -7  -9    4.49    2.26
  -5   7  -9    3.77    1.83
   5   7  10   18.74    2.89
   5  -7  10   17.97    3.13
  -5  -7 -10   13.67    3.05
  -5   7 -10   15.57    3.45
   5   7  11    0.10    1.74
   5  -7  11    1.62    2.23
  -5  -7 -11   -1.19    1.41
  -5   7 -11   -1.13    1.58
   5   7  12    0.91    2.37
   5  -7  12    5.51    2.61
  -5  -7 -12    4.43    2.41
  -5   7 -12    4.82    2.52
   5   7  13    5.91    2.58
   5  -7  13   -1.73    3.03
  -5  -7 -13    3.67    2.47
  -5   7 -13    3.00    2.12
   5   7  14   -0.93    2.03
   5  -7  14   -0.63    2.51
  -5  -7 -14    1.75    1.66
  -5   7 -14   -0.09    2.09
   5   7  15    8.13    3.41
   5  -7  15    6.89    3.83
  -5   7 -15    0.56    3.23
   5   7  16    1.12    2.58
   5  -7  16   -2.59    2.90
  -5  -7 -16    0.51    2.42
  -5   7 -16    1.42    2.54
   5   9 -15   -0.55    2.15
  -5   9  15    1.79    2.66
  -5  -9  15    3.76    3.11
   5  -9 -14    6.09    3.28
   5   9 -14    2.17    2.91
  -5   9  14    5.11    3.08
  -5  -9  14    3.15    3.41
   5  -9 -13    7.17    3.19
   5   9 -13    7.13    2.95
  -5   9  13    9.25    3.37
  -5  -9  13    2.14    3.44
   5  -9 -12   29.46    4.59
   5   9 -12   23.88    3.60
  -5  -9  12   28.62    4.74
  -5   9  12   19.61    3.74
   5  -9 -11   -1.81    1.54
   5   9 -11    2.40    1.46
  -5   9  11   -2.31    1.85
  -5  -9  11   -0.32    2.19
   5  -9 -10   13.40    3.30
   5   9 -10   14.94    2.71
  -5  -9  10   13.61    3.51
  -5   9  10   12.09    3.20
   5   9  -9    5.18    1.91
   5  -9  -9    0.42    1.95
  -5   9   9    1.25    1.80
  -5  -9   9   -1.01    1.65
   5  -9  -8   -0.20    1.47
   5   9  -8    1.33    1.41
  -5   9   8   -1.26    1.41
  -5  -9   8    0.54    1.26
   5  -9  -7    2.60    1.53
   5   9  -7    1.70    1.87
  -5   9   7    1.85    1.51
  -5  -9   7    4.67    1.96
   5   9  -6   94.18    3.89
   5  -9  -6  104.38    6.25
   5   9  -6  100.89    6.83
  -5   9   6  106.03    6.44
  -5  -9   6  108.29    6.14
   5  -9  -5    6.57    1.97
   5   9  -5    3.21    1.98
   5   9  -5    3.18    0.94
  -5   9   5    4.44    1.90
  -5  -9   5    9.60    1.87
  -5   9   5    1.98    0.94
   5   9  -4  137.53    7.69
   5  -9  -4  142.24    6.90
   5   9  -4  135.84    5.33
  -5   9   4  133.08    5.48
  -5  -9   4  143.32    6.90
  -5   9   4  128.35    7.18
   5   9  -3    5.53    2.02
   5  -9  -3    6.31    1.69
   5   9  -3    3.89    1.10
  -5   9   3    4.38    1.90
  -5   9   3    3.59    1.20
  -5  -9   3    6.26    1.64
   5   9  -2    2.87    1.12
   5  -9  -2    3.43    1.25
   5   9  -2    4.12    1.77
  -5  -9   2    4.05    1.37
  -5   9   2    2.80    1.37
  -5   9   2    3.44    1.74
   5   9  -1    1.37    1.32
   5   9  -1   -0.28    1.76
   5  -9  -1    2.59    1.16
  -5   9   1    5.54    1.47
  -5  -9   1    3.08    1.52
  -5   9   1    5.77    1.49
   5   9   0   22.22    2.29
   5   9   0   25.16    3.07
   5  -9   0   25.94    1.97
   5   9   0   23.33    2.56
  -5   9   0   16.82    2.64
  -5   9   0   20.36    3.06
   5   9   1    7.40    1.79
   5   9   1    9.05    2.05
   5   9   1    8.06    1.85
   5  -9   1   11.38    2.17
   5  -9   1    6.25    1.05
  -5   9  -1    9.21    2.07
   5   9   2  136.19    6.47
   5  -9   2  135.87    7.21
   5   9   2  133.91    6.71
   5   9   2  132.94    6.55
  -5   9  -2  143.23    7.64
   5  -9   3    5.23    1.75
   5   9   3    0.22    1.46
   5   9   3    0.09    1.32
  -5   9  -3    0.84    1.64
   5   9   4   16.54    1.97
   5  -9   4   10.36    2.32
   5   9   4    8.81    2.23
  -5  -9  -4    9.46    1.70
  -5   9  -4   11.89    2.67
   5   9   5    3.56    1.60
   5   9   5    3.06    1.47
   5  -9   5    6.10    2.11
  -5  -9  -5    0.96    1.15
  -5   9  -5    4.52    2.07
   5   9   6    8.05    2.08
   5  -9   6    8.45    2.92
  -5  -9  -6   12.73    1.71
  -5  -9  -6   10.72    2.20
  -5   9  -6   10.85    2.75
   5   9   7    4.41    1.85
   5  -9   7    5.64    2.56
  -5  -9  -7    3.57    1.13
  -5   9  -7    2.56    2.37
  -5  -9  -7    4.25    1.81
   5  -9   8   10.46    3.33
   5   9   8    8.98    2.57
  -5  -9  -8   14.88    2.56
  -5   9  -8   13.73    3.04
   5   9   9    6.79    2.25
   5  -9   9    5.21    2.95
  -5  -9  -9    0.31    2.07
  -5   9  -9    6.66    2.51
   5   9  10   13.32    3.05
   5  -9  10    6.02    3.20
  -5  -9 -10   11.51    2.76
  -5   9 -10   10.63    3.40
   5   9  11    7.15    2.76
   5  -9  11    8.18    3.35
  -5   9 -11    3.57    2.97
  -5  -9 -11    5.01    2.36
   5   9  12   -0.46    2.05
   5  -9  12    6.98    2.53
  -5   9 -12   -0.81    2.59
   5   9  13    2.23    3.27
   5  -9  13    4.65    3.90
  -5  -9 -13    7.72    2.64
  -5   9 -13    6.12    2.74
   5   9  14    4.45    3.11
   5  -9  14    4.02    3.40
  -5  -9 -14    1.20    2.39
  -5   9 -14    0.29    3.12
   5  11 -13    3.48    2.48
   5 -11 -13   -0.56    2.67
  -5  11  13    1.46    3.05
  -5 -11  13    3.12    3.45
   5  11 -12    6.15    2.79
   5 -11 -12    5.95    3.55
  -5 -11  12    8.47    3.89
  -5  11  12    5.32    2.82
   5  11 -11   10.82    2.91
   5 -11 -11    8.22    3.89
  -5  11  11    7.85    3.56
  -5 -11  11   11.32    4.13
   5 -11 -10   -0.25    2.45
   5  11 -10    1.20    1.92
  -5 -11  10    1.36    2.51
  -5  11  10    1.70    2.37
   5  11  -9    3.23    2.54
   5 -11  -9   -0.58    2.56
  -5 -11   9    5.59    2.85
  -5  11   9    5.02    2.57
   5  11  -8   -0.07    1.65
   5 -11  -8   -0.62    1.94
  -5 -11   8   -2.13    1.85
  -5  11   8    2.67    1.46
   5  11  -7   15.17    3.76
   5 -11  -7   25.92    3.66
  -5  11   7   16.93    3.57
  -5 -11   7   17.43    3.70
   5 -11  -6   15.46    3.28
   5  11  -6   26.15    3.92
  -5 -11   6   17.31    3.41
  -5  11   6   20.22    3.14
   5 -11  -5   51.36    4.60
   5  11  -5   46.75    5.17
  -5  11   5   42.28    4.28
  -5 -11   5   44.01    4.58
   5  11  -4    9.26    2.72
   5 -11  -4   11.22    2.33
  -5 -11   4   11.18    2.87
  -5  11   4   16.17    2.10
  -5  11   4   12.27    2.71
   5  11  -3   10.12    2.79
   5 -11  -3   12.96    2.14
   5  11  -3    7.62    1.81
  -5  11   3   11.59    2.23
  -5  11   3   11.43    2.17
  -5 -11   3    4.80    2.68
   5  11  -2   -0.31    1.35
   5 -11  -2   -0.19    0.97
   5  11  -2    1.12    0.88
  -5 -11   2   -0.92    1.20
  -5  11   2    1.39    1.31
  -5  11   2   -1.10    0.95
   5  11  -1    1.97    1.48
   5  11  -1    7.03    2.25
   5 -11  -1    3.11    1.30
  -5 -11   1    2.65    1.93
  -5  11   1    3.98    1.75
  -5  11   1    0.70    1.77
   5  11   0   14.38    2.92
   5 -11   0   11.77    2.78
   5  11   0    9.33    2.17
  -5 -11   0    9.43    2.18
  -5  11   0   13.54    2.53
   5  11   1   47.97    4.69
   5 -11   1   56.09    5.19
   5  11   1   56.30    4.39
   5  11   1   60.00    4.74
  -5  11  -1   49.67    4.74
   5  11   2   27.82    3.50
   5 -11   2   22.99    3.51
   5  11   2   27.58    3.39
  -5  11  -2   28.41    3.69
   5 -11   3   22.23    3.66
   5  11   3   20.22    2.80
   5  11   3   26.15    3.36
  -5 -11  -3   31.04    3.51
  -5  11  -3   26.12    3.84
   5  11   4    3.45    1.69
   5 -11   4    2.22    2.13
  -5 -11  -4    0.75    1.54
  -5 -11  -4   -0.31    1.85
  -5  11  -4    2.05    1.77
   5 -11   5    2.00    1.90
   5  11   5    1.91    1.84
  -5 -11  -5    0.72    1.57
  -5  11  -5    2.62    1.86
  -5 -11  -5    2.01    2.02
   5 -11   6    2.29    2.16
   5  11   6    3.85    1.88
  -5 -11  -6    4.90    2.45
  -5  11  -6    4.47    2.08
   5  11   7    7.25    2.76
   5 -11   7   10.96    3.39
  -5  11  -7    6.80    3.19
  -5 -11  -7    7.12    3.04
   5  11   8    7.49    2.92
   5 -11   8   10.80    3.08
  -5 -11  -8    9.38    3.23
  -5  11  -8   11.22    3.47
   5  11   9    6.52    3.20
   5 -11   9   15.57    4.27
  -5 -11  -9   14.78    3.09
  -5  11  -9    8.91    3.62
   5  11  10    1.07    1.92
   5 -11  10    3.56    2.52
  -5 -11 -10   -1.53    2.75
  -5  11 -10    3.72    2.17
   5  11  11    1.35    2.35
   5 -11  11    1.06    2.91
  -5 -11 -11   -2.55    2.35
  -5  11 -11    2.48    2.11
   5  13  -9    0.33    2.44
   5 -13  -9    6.86    3.19
  -5 -13   9    2.12    3.20
  -5  13   9    3.02    3.02
   5 -13  -8   -0.68    2.68
   5  13  -8   -0.82    2.92
  -5 -13   8    7.25    2.61
  -5  13   8   -0.05    2.68
   5  13  -7   14.17    4.32
   5 -13  -7   13.56    3.97
  -5 -13   7   19.39    4.45
  -5  13   7   17.85    3.56
  -5  13   6    6.54    2.90
  -5 -13   6    0.85    3.12
   5  13  -5    6.65    3.89
   5 -13  -5   12.50    3.46
  -5 -13   5   11.37    3.65
  -5  13   5   16.90    3.29
   5  13  -4    2.09    2.85
  -5 -13   4    0.89    2.45
  -5  13   4    3.41    2.17
   5  13  -3   11.53    3.48
  -5 -13   3    7.41    3.33
  -5  13   3    8.66    2.80
   5  13  -2    0.45    1.97
  -5  13   2   -0.02    1.47
  -5 -13   2   -0.83    1.68
  -5  13   2    0.58    1.49
   5  13  -1    0.25    2.49
   5 -13  -1   -0.58    2.00
  -5 -13   1    6.41    2.29
  -5  13   1    0.68    2.12
   5  13   0   -0.85    1.93
   5 -13   0   -2.24    1.98
  -5 -13   0    1.90    1.80
   5 -13   1   18.13    3.97
   5  13   1   21.62    3.81
  -5 -13  -1   17.38    3.69
  -5  13  -1   20.53    3.67
  -5 -13  -1   14.54    3.22
   5 -13   2   -1.45    1.99
   5  13   2    0.34    1.73
   5  13   2    1.21    2.11
  -5  13  -2    1.24    2.24
  -5 -13  -2    3.95    1.77
   5 -13   3   20.68    4.45
   5  13   3   18.54    4.09
  -5 -13  -3   27.15    4.07
  -5  13  -3   24.06    4.28
   5  13   4    0.19    2.30
   5 -13   4    7.53    2.69
  -5 -13  -4    1.29    2.20
  -5  13  -4   -1.40    2.06
   5 -13   5    0.96    1.87
   5  13   5    1.44    2.05
  -5  13  -5   -1.28    2.49
  -5 -13  -5    0.09    2.05
   5 -13   6   -1.06    2.48
   5  13   6    4.00    2.14
  -5  13  -6   -2.63    2.38
  -5 -13  -6    0.43    1.74
   5 -13   7    5.68    3.48
   5  13   7    2.46    2.92
  -5  13  -7    7.05    3.53
  -5 -13  -7    1.47    3.04
   6   0 -19   -0.80    2.51
  -6   0  19   -1.05    2.85
   6   0 -18    0.43    2.14
  -6   0  18    0.32    2.32
  -6   0  17    2.94    2.69
   6   0 -16    3.48    2.01
   6   0 -15    1.03    0.96
  -6   0  15    4.15    2.15
   6   0 -14   16.41    1.82
   6   0 -14   21.10    3.42
  -6   0  14   19.33    3.28
   6   0 -13   -1.71    1.68
  -6   0  13   -0.15    1.41
   6   0 -12   93.69    5.89
   6   0 -12   95.76    4.07
  -6   0  12   99.15    6.13
   6   0 -11    1.13    1.17
   6   0 -11    0.83    0.66
  -6   0  11   -0.75    1.13
   6   0 -10   20.71    2.17
   6   0 -10   15.14    1.40
  -6   0  10   16.13    2.05
   6   0  -9    3.19    1.24
  -6   0   9   -0.21    0.93
   6   0  -8   96.22    3.50
   6   0  -8   94.63    4.64
  -6   0   8   96.22    4.42
  -6   0   7   -0.35    0.69
  -6   0   7   -0.08    0.53
   6   0  -6  119.95    4.84
  -6   0   6  111.78    3.98
  -6   0   6  109.77    3.69
   6   0  -5   -0.09    0.66
  -6   0   5    0.97    0.53
  -6   0   5   -0.14    0.49
   6   0  -4   78.53    3.48
  -6   0   4   80.70    2.99
  -6   0   4   80.08    2.43
   6   0  -3    0.32    0.67
  -6   0   3    0.33    0.25
  -6   0   3    0.13    0.52
   6   0  -2   28.86    1.61
  -6   0   2   30.09    1.69
   6   0  -1    0.09    0.13
   6   0  -1   -0.04    0.59
  -6   0   1    0.19    0.13
  -6   0   1   -0.28    0.56
   6   0   0  330.79    4.08
   6   0   0  329.79    7.81
  -6   0   0  333.87    7.96
   6   0   1    0.25    0.39
   6   0   1   -0.21    0.25
  -6   0  -1    0.25    0.43
   6   0   2  130.94    3.24
   6   0   2  125.16    4.05
  -6   0  -2  132.19    4.38
   6   0   3    0.04    0.47
   6   0   3   -0.30    0.54
  -6   0  -3   -0.48    0.60
   6   0   4   -0.33    0.67
   6   0   4   -0.25    0.57
  -6   0  -4   -0.42    0.56
   6   0   5    1.23    0.91
   6   0   5    0.27    0.53
  -6   0  -5    0.25    0.73
   6   0   6  528.83   14.19
   6   0   6  508.82   12.81
  -6   0  -6  519.50   13.35
   6   0   7    2.47    0.92
  -6   0  -7   -0.19    0.83
   6   0   8   91.69    4.38
   6   0   8   99.12    5.21
  -6   0  -8   96.69    4.60
   6   0   9    0.11    1.28
   6   0   9    1.53    0.96
  -6   0  -9    0.02    0.99
   6   0  10    5.44    2.10
   6   0  10    2.64    1.11
  -6   0 -10    5.26    1.37
   6   0  11   -1.54    2.47
  -6   0 -11    5.32    1.47
   6   0  12    2.42    2.37
  -6   0 -12    0.81    1.42
  -6   0 -12    5.11    1.58
   6   0  13    1.02    1.82
  -6   0 -13    1.02    1.49
  -6   0 -13    1.59    1.44
   6   0  14    6.73    3.37
  -6   0 -14    7.32    2.13
  -6   0 -14    6.72    2.26
   6   0  15    6.23    2.83
  -6   0 -15    0.89    1.75
  -6   0 -15   -0.37    1.69
   6   0  16    0.53    2.78
  -6   0 -16    7.37    2.57
   6   0  17    3.65    3.15
  -6   0 -17    1.35    2.51
   6   0  18   -1.69    3.35
   6  -2 -19    1.62    3.60
  -6   2  19   -1.37    3.27
  -6  -2  19    9.33    3.00
   6   2 -18    2.69    1.95
   6  -2 -18   -1.33    2.45
  -6  -2  18   -0.27    2.40
  -6   2  18   -1.26    2.18
   6   2 -17    1.27    1.38
   6   2 -17    1.26    2.23
   6  -2 -17   -1.07    2.09
  -6  -2  17    2.58    2.19
  -6   2  17    1.40    1.99
   6   2 -16   14.25    3.14
   6   2 -16   12.57    2.36
   6  -2 -16    6.40    3.56
  -6  -2  16   11.45    3.82
  -6   2  16   16.84    3.58
   6   2 -15   11.47    2.82
   6   2 -15    8.85    1.92
   6  -2 -15   12.28    3.27
  -6   2  15    8.79    2.90
  -6  -2  15    8.94    2.93
   6   2 -14   13.34    2.24
   6   2 -14   15.12    2.91
   6  -2 -14   19.13    3.10
  -6   2  14   16.42    2.76
  -6  -2  14   17.60    3.57
   6  -2 -13   21.92    3.54
   6   2 -13   18.88    3.01
   6   2 -13   19.60    2.12
  -6  -2  13   20.25    2.89
  -6   2  13   12.38    2.85
   6   2 -12    6.41    1.47
   6   2 -12    8.39    2.21
   6  -2 -12   12.07    2.81
  -6   2  12   15.92    2.44
  -6  -2  12   10.32    2.75
   6   2 -11   12.16    2.39
   6   2 -11   11.43    1.85
   6  -2 -11   14.28    2.49
  -6   2  11   12.30    1.00
  -6  -2  11   16.54    2.38
  -6   2  11   10.67    1.94
   6  -2 -10    5.00    2.02
   6   2 -10    3.32    1.58
   6   2 -10    4.30    1.24
  -6   2  10    3.45    1.34
  -6  -2  10    8.00    1.94
   6  -2  -9    3.01    1.26
   6   2  -9    1.22    0.96
   6   2  -9    0.44    1.27
  -6   2   9    1.34    1.20
  -6   2   9    1.28    0.45
  -6  -2   9    3.85    1.12
   6  -2  -8   12.00    1.82
   6   2  -8   13.52    1.61
   6   2  -8   10.86    1.77
  -6   2   8   11.84    1.73
  -6  -2   8   12.20    1.84
  -6   2   8   12.43    0.96
   6  -2  -7   88.33    4.62
   6   2  -7   77.84    3.83
   6   2  -7   87.29    4.08
  -6   2   7   75.57    2.51
  -6   2   7   84.00    3.85
  -6  -2   7   83.75    3.78
   6  -2  -6  219.76    7.58
   6   2  -6  231.57    7.41
   6   2  -6  206.78    6.83
  -6   2   6  217.06    6.80
  -6   2   6  215.29    5.14
  -6  -2   6  215.06    6.26
   6  -2  -5  241.31    7.78
   6   2  -5  248.10    7.24
   6   2  -5  249.13    7.37
  -6   2   5  247.25    6.77
  -6   2   5  242.61    5.62
  -6  -2   5  243.42    6.13
   6  -2  -4  192.14    6.23
   6   2  -4  195.20    6.06
   6   2  -4  190.04    5.85
  -6   2   4  199.91    4.94
  -6   2   4  203.96    5.51
  -6  -2   4  213.21    4.97
   6  -2  -3   15.04    1.39
   6   2  -3   13.20    1.24
  -6   2   3   11.25    0.98
  -6   2   3   10.91    1.00
  -6  -2   3   12.20    0.77
  -6  -2   3   10.57    1.12
   6  -2  -2   23.67    1.79
   6   2  -2   26.21    1.68
  -6   2   2   30.20    1.64
  -6  -2   2   24.60    1.59
  -6   2   2   25.41    1.28
   6  -2  -1  110.04    3.74
   6   2  -1  112.66    3.86
  -6   2   1  115.33    3.64
  -6  -2   1  109.18    1.34
  -6  -2   1  107.06    3.98
  -6  -2   1  107.84    1.38
  -6   2   1  115.87    3.10
   6  -2   0  180.02    4.87
   6   2   0  173.78    5.15
   6   2   0  174.46    1.92
  -6   2   0  187.63    5.36
  -6  -2   0  170.41    2.14
  -6  -2   0  182.82    5.36
  -6   2   0  173.86    4.25
   6  -2   1  171.28    4.60
   6  -2   1  168.62    4.33
   6   2   1  176.44    2.76
   6   2   1  164.75    5.02
  -6   2  -1  164.97    5.24
  -6  -2  -1  168.27    5.20
   6  -2   2   36.04    1.78
   6   2   2   36.21    2.09
   6   2   2   35.58    1.22
   6  -2   2   39.93    1.75
  -6   2  -2   39.84    2.24
  -6  -2  -2   35.61    2.07
   6   2   3    6.32    0.63
   6   2   3    4.54    0.88
   6  -2   3    6.01    0.98
   6  -2   3    6.19    0.71
  -6  -2  -3    5.67    0.90
  -6   2  -3    5.80    1.16
   6  -2   4    0.49    0.43
   6   2   4    0.42    0.47
   6   2   4   -0.24    0.57
  -6   2  -4    0.31    0.64
  -6  -2  -4    0.05    0.66
   6  -2   5   10.16    0.93
   6  -2   5    9.21    1.65
   6   2   5   10.31    1.44
   6   2   5   13.56    1.29
  -6   2  -5   10.56    1.56
  -6  -2  -5    9.46    1.34
   6  -2   6    5.49    1.60
   6  -2   6    4.89    0.77
   6   2   6    5.06    1.23
   6   2   6    6.03    1.29
  -6  -2  -6    5.95    1.14
  -6   2  -6    3.90    1.34
   6  -2   7   22.55    1.66
   6  -2   7   22.01    2.72
   6   2   7   27.55    2.35
   6   2   7   23.06    2.21
  -6   2  -7   26.22    2.14
  -6  -2  -7   21.07    1.90
   6  -2   8   29.33    3.06
   6   2   8   23.82    2.63
   6   2   8   24.04    2.50
   6  -2   8   24.96    1.84
  -6   2  -8   24.49    2.68
  -6  -2  -8   25.61    2.03
   6   2   9   20.41    2.44
   6   2   9   19.29    2.52
   6  -2   9   22.62    3.20
   6  -2   9   19.20    1.72
  -6  -2  -9   21.33    2.02
  -6   2  -9   14.59    2.46
   6   2  10    5.46    1.90
   6   2  10    5.76    2.27
   6  -2  10   11.74    2.79
  -6  -2 -10    6.79    1.54
  -6   2 -10    8.84    1.44
  -6   2 -10    7.91    2.00
   6   2  11    9.40    2.53
   6  -2  11   14.85    3.12
  -6   2 -11    6.87    1.56
  -6  -2 -11    6.58    2.06
  -6  -2 -11    7.19    1.59
  -6   2 -11    9.29    2.12
   6   2  12   -1.27    2.06
  -6  -2 -12    2.94    1.22
  -6  -2 -12    4.25    1.69
  -6   2 -12    1.08    1.19
  -6   2 -12    0.31    1.67
   6   2  13   -1.88    2.12
  -6  -2 -13   -0.71    1.20
  -6  -2 -13    0.53    1.81
  -6   2 -13    6.14    1.75
  -6   2 -13    1.52    1.26
   6   2  14    3.11    2.66
   6  -2  14    1.45    2.21
  -6  -2 -14    5.63    1.53
  -6  -2 -14    1.86    2.14
  -6   2 -14    2.26    1.97
  -6   2 -14    0.63    1.54
   6  -2  15    6.23    3.37
   6   2  15    6.72    3.15
  -6   2 -15    6.14    2.45
  -6  -2 -15    4.57    2.67
   6  -2  16    4.11    3.37
   6   2  16    8.93    3.14
  -6   2 -16   -0.04    2.34
  -6  -2 -16    0.55    2.42
   6   2  17   -2.25    2.66
   6  -2  17    1.47    3.06
  -6  -2 -17   -0.28    2.30
   6  -4 -19   -1.81    3.06
  -6  -4  19    0.93    3.12
  -6   4  19   -1.00    2.60
   6   4 -18    2.20    2.52
   6  -4 -18   -2.96    3.40
  -6   4  18    6.95    2.44
  -6  -4  18    0.31    3.58
   6  -4 -17   -1.31    2.30
   6   4 -17   -0.63    1.83
  -6   4  17    0.45    1.79
  -6  -4  17   -1.09    2.69
   6   4 -16   -0.04    1.78
   6  -4 -16    0.77    2.26
   6   4 -16    2.13    1.49
  -6   4  16    0.74    1.66
  -6  -4  16   -2.05    2.31
   6   4 -15    9.44    2.39
   6  -4 -15    7.96    3.15
   6   4 -15    8.09    2.38
  -6   4  15    6.87    2.44
  -6  -4  15    5.20    3.11
   6   4 -14   -0.28    1.67
   6  -4 -14   -0.98    1.59
   6   4 -14    3.79    1.59
  -6   4  14    1.32    1.93
  -6  -4  14    0.42    2.07
   6   4 -13   69.99    5.09
   6  -4 -13   75.01    5.92
   6   4 -13   72.17    4.72
  -6   4  13   70.43    5.29
  -6  -4  13   76.53    6.16
   6   4 -12   10.50    2.18
   6  -4 -12    7.52    2.83
   6   4 -12    7.85    2.01
  -6   4  12   10.00    2.11
  -6  -4  12    7.23    2.27
   6  -4 -11    6.31    2.20
   6   4 -11    3.64    1.78
   6   4 -11    6.77    1.73
  -6   4  11    6.31    2.00
  -6  -4  11   10.20    2.57
   6  -4 -10   -0.42    1.47
   6   4 -10    1.12    1.25
   6   4 -10   -0.10    1.02
  -6  -4  10    1.65    1.73
   6   4  -9    3.09    1.24
   6  -4  -9    3.63    1.56
   6   4  -9    0.54    1.02
  -6   4   9    0.14    1.04
  -6  -4   9   -1.23    1.19
   6   4  -8    1.26    1.04
   6  -4  -8    4.31    1.19
  -6   4   8    0.88    0.83
  -6   4   8   -0.03    0.28
  -6  -4   8   -0.21    1.04
   6  -4  -7  141.66    6.55
   6   4  -7  150.92    6.42
   6   4  -7  138.65    5.13
  -6   4   7  143.30    6.07
  -6   4   7  143.64    3.46
  -6  -4   7  144.87    5.75
   6   4  -6   -1.01    0.88
   6  -4  -6    1.33    0.89
   6   4  -6   -0.68    0.65
  -6   4   6    0.07    0.80
  -6   4   6   -0.20    0.33
  -6  -4   6   -0.27    0.81
   6  -4  -5  199.27    7.69
   6   4  -5  197.38    6.23
   6   4  -5  198.38    7.17
  -6   4   5  192.65    6.80
  -6   4   5  200.48    4.94
  -6  -4   5  199.01    6.05
   6   4  -4    6.26    1.44
   6  -4  -4    3.61    1.30
   6   4  -4    3.38    0.96
  -6   4   4    4.43    0.68
  -6   4   4    3.66    1.03
  -6  -4   4    6.28    0.82
   6   4  -3    1.74    0.75
   6   4  -3    0.65    0.71
  -6   4   3    1.08    0.71
  -6   4   3    0.58    0.57
  -6  -4   3    0.21    0.44
   6  -4  -2   11.04    1.40
   6   4  -2   14.52    1.54
   6   4  -2   10.28    1.11
  -6   4   2    9.87    1.23
  -6   4   2   11.02    1.17
  -6  -4   2   11.38    0.77
   6   4  -1   48.47    2.56
   6  -4  -1   47.28    2.50
   6   4  -1   44.88    2.26
  -6   4   1   53.47    2.42
  -6   4   1   47.71    2.31
  -6  -4   1   50.22    1.72
   6   4   0    1.53    0.40
   6  -4   0    1.80    0.66
   6   4   0    1.97    0.86
  -6   4   0    3.17    0.73
  -6   4   0    0.96    0.80
  -6  -4   0    3.22    0.80
   6  -4   1  224.85    5.62
   6  -4   1  224.23    6.77
   6   4   1  226.06    7.23
   6   4   1  219.25    4.89
  -6   4  -1  224.48    7.11
  -6  -4  -1  215.97    6.95
   6   4   2   -0.46    0.87
   6  -4   2    1.31    0.86
   6  -4   2    0.76    0.43
   6   4   2    1.10    0.40
  -6   4  -2    2.08    0.78
  -6  -4  -2    1.77    0.67
   6   4   3   36.51    2.29
   6  -4   3   36.32    1.48
   6  -4   3   35.68    2.43
   6   4   3   35.09    1.69
  -6   4  -3   34.84    2.36
  -6  -4  -3   33.66    2.20
   6   4   4   -0.70    0.72
   6  -4   4   -0.24    0.26
   6   4   4    0.48    0.48
  -6   4  -4    0.81    0.69
  -6  -4  -4   -0.09    0.63
   6  -4   5    8.66    0.68
   6  -4   5    6.98    1.72
   6   4   5    9.67    1.44
   6   4   5    7.34    1.05
  -6   4  -5    8.56    1.61
  -6  -4  -5    9.39    1.27
   6  -4   6    3.48    1.35
   6  -4   6    0.75    0.39
   6   4   6    2.18    0.89
   6   4   6   -0.09    0.92
  -6   4  -6    0.29    1.21
  -6  -4  -6   -0.45    0.72
   6  -4   7  118.95    6.62
   6   4   7  116.13    5.98
   6  -4   7  118.36    3.49
   6   4   7  122.07    5.42
  -6   4  -7  125.50    6.37
  -6  -4  -7  134.53    5.10
   6  -4   8    9.54    1.96
   6  -4   8    3.25    0.59
   6   4   8    5.70    1.43
   6   4   8    6.34    1.50
  -6   4  -8    5.13    1.46
  -6  -4  -8    2.83    1.19
   6  -4   9   24.59    3.15
   6   4   9   18.51    2.65
   6   4   9   21.75    2.75
  -6   4  -9   19.18    1.34
  -6   4  -9   22.72    2.67
  -6  -4  -9   24.23    1.81
   6   4  10    0.61    1.24
   6  -4  10    4.92    2.11
   6   4  10    2.84    1.62
  -6   4 -10    2.04    0.67
  -6   4 -10    3.93    1.72
  -6  -4 -10    0.37    0.87
   6  -4  11    1.22    1.91
   6   4  11    3.07    1.49
  -6   4 -11    4.55    1.87
  -6  -4 -11    1.64    1.04
  -6  -4 -11   -0.11    1.75
   6  -4  12   -1.63    1.56
   6   4  12   -1.35    1.54
  -6   4 -12    1.57    1.25
  -6  -4 -12    1.32    1.51
   6  -4  13    5.00    2.50
   6   4  13    1.62    2.36
  -6   4 -13    2.18    2.20
  -6  -4 -13    2.95    2.24
   6  -4  14    3.48    2.96
   6   4  14   -0.73    2.35
  -6   4 -14    1.24    2.11
  -6  -4 -14    1.54    2.14
   6  -4  15    8.71    3.85
   6   4  15    4.70    2.77
  -6   4 -15   13.03    3.23
  -6  -4 -15    8.77    2.68
   6  -4  16   -0.44    2.19
   6   4  16    0.64    2.38
  -6  -4 -16    3.60    2.20
  -6   4 -16   -2.22    2.08
   6   4  17   -0.06    3.13
   6  -4  17    2.58    3.35
  -6   4 -17    2.89    2.76
  -6  -4 -17    0.48    2.83
   6   6 -18    4.03    2.95
   6  -6 -18    0.52    3.34
  -6  -6  18    8.50    3.65
  -6   6  18   -1.62    3.02
   6   6 -17    0.85    2.17
   6  -6 -17   -0.44    2.47
  -6  -6  17    0.15    2.64
  -6   6  17    1.09    2.34
   6  -6 -16   -0.61    2.04
   6   6 -16   -0.74    1.82
  -6  -6  16   -0.22    1.69
  -6   6  16    1.44    2.01
   6   6 -15    9.55    3.09
   6  -6 -15   14.53    3.64
  -6  -6  15   13.59    3.64
  -6   6  15    6.55    3.32
   6   6 -14   12.09    3.14
  -6  -6  14   16.41    3.44
  -6   6  14   14.23    2.83
   6   6 -13   25.02    3.53
   6  -6 -13   26.72    4.08
  -6  -6  13   23.53    4.35
  -6   6  13   23.91    3.28
   6   6 -12   13.42    2.78
   6   6 -12   11.47    1.66
   6  -6 -12   16.24    2.63
  -6  -6  12   14.58    3.22
  -6   6  12    9.06    2.82
   6   6 -11   -0.34    1.64
   6   6 -11    1.21    0.89
   6  -6 -11    0.80    1.60
  -6  -6  11    2.12    1.95
  -6   6  11    3.68    1.53
   6  -6 -10    2.45    1.34
   6   6 -10    0.17    1.13
   6   6 -10    0.34    0.80
  -6  -6  10   -1.74    1.60
  -6   6  10   -0.04    1.13
   6   6  -9    5.39    1.89
   6  -6  -9    5.38    1.80
   6   6  -9    3.60    1.21
  -6   6   9    5.19    1.98
  -6  -6   9    8.01    2.26
   6   6  -8    5.86    1.57
   6   6  -8    6.72    1.19
   6  -6  -8    6.75    2.20
  -6  -6   8    5.39    1.92
  -6   6   8    6.33    1.57
   6   6  -7   91.61    5.40
   6   6  -7   94.28    3.93
   6  -6  -7   91.87    5.49
  -6  -6   7   86.62    4.96
  -6   6   7   90.75    5.22
  -6   6   7   76.42    2.47
   6   6  -6   97.00    5.45
   6  -6  -6   88.63    5.25
   6   6  -6  100.01    4.09
  -6   6   6   86.06    4.93
  -6  -6   6   94.98    4.74
  -6   6   6   87.07    2.90
   6  -6  -5  149.21    6.73
   6   6  -5  146.15    6.95
   6   6  -5  152.58    5.37
  -6  -6   5  149.80    5.75
  -6   6   5  150.11    6.67
  -6   6   5  144.99    4.49
   6   6  -4   36.45    2.16
   6   6  -4   32.44    2.93
   6  -6  -4   38.98    3.09
  -6  -6   4   32.20    2.32
  -6   6   4   29.76    1.78
  -6   6   4   35.16    2.79
   6   6  -3    3.00    1.09
   6   6  -3    5.38    1.37
   6  -6  -3    3.72    1.44
  -6   6   3    4.60    0.94
  -6  -6   3    5.68    0.98
  -6   6   3    5.33    1.18
   6   6  -2   11.60    1.66
   6   6  -2    8.95    1.37
   6  -6  -2   10.43    1.60
  -6  -6   2   11.85    1.27
  -6   6   2   10.06    1.40
  -6   6   2    9.69    1.32
   6   6  -1   58.62    3.16
   6  -6  -1   53.27    2.82
   6   6  -1   58.58    3.60
  -6   6   1   56.65    3.17
  -6  -6   1   55.85    2.49
  -6   6   1   55.52    3.06
   6  -6   0   30.06    1.87
   6   6   0   26.61    2.37
   6   6   0   29.16    1.74
   6   6   0   24.83    2.22
  -6   6   0   26.76    2.30
  -6   6   0   28.02    2.43
   6  -6   1  161.68    4.73
   6   6   1  150.27    6.12
   6   6   1  163.46    5.13
   6  -6   1  159.42    6.48
  -6   6  -1  150.28    6.34
  -6  -6  -1  158.32    6.22
   6   6   2   32.39    2.65
   6  -6   2   34.48    2.59
   6   6   2   35.44    2.10
   6  -6   2   36.94    1.59
  -6   6  -2   39.85    2.81
  -6  -6  -2   33.98    2.54
   6   6   3    6.76    1.49
   6   6   3    4.89    0.96
   6  -6   3    4.88    0.61
   6  -6   3    5.89    1.45
  -6  -6  -3    5.73    1.34
  -6   6  -3    5.62    1.37
   6   6   4    3.19    1.54
   6   6   4    6.14    1.11
   6  -6   4    4.22    1.69
   6  -6   4    4.69    0.46
  -6  -6  -4    4.84    1.27
  -6   6  -4    6.70    1.39
   6   6   5    5.78    1.63
   6   6   5    7.29    1.33
   6  -6   5    2.79    1.55
  -6  -6  -5    4.82    1.28
  -6   6  -5    6.08    1.73
   6   6   6    3.48    1.67
   6   6   6    4.15    1.29
   6  -6   6    4.14    2.03
  -6  -6  -6    5.14    1.27
  -6   6  -6    3.37    1.82
   6   6   7   26.43    2.49
   6   6   7   25.74    2.96
   6  -6   7   26.21    3.19
  -6  -6  -7   22.55    1.80
  -6   6  -7   25.18    2.75
   6   6   8   18.13    2.94
   6   6   8   18.96    2.49
   6  -6   8   20.55    3.50
  -6  -6  -8   19.62    1.69
  -6   6  -8   22.45    3.15
   6   6   9   16.33    2.52
   6   6   9   14.33    2.31
   6  -6   9   19.33    3.42
  -6  -6  -9   13.37    1.46
  -6   6  -9   13.46    2.91
   6   6  10    3.62    1.73
   6  -6  10    0.94    2.00
  -6  -6 -10    4.15    1.71
  -6   6 -10    2.45    1.69
   6   6  11    6.51    2.02
   6  -6  11    8.05    3.24
  -6  -6 -11    6.25    2.53
  -6   6 -11    7.96    2.60
   6   6  12   -0.99    1.47
   6  -6  12   -0.19    1.98
  -6   6 -12   -0.27    1.92
   6   6  13    8.65    2.75
   6  -6  13    5.33    3.13
  -6  -6 -13    2.07    2.70
  -6   6 -13    2.42    2.83
   6   6  14    9.54    2.93
   6  -6  14    1.60    3.54
  -6  -6 -14    4.47    2.22
  -6   6 -14    0.49    2.86
   6   6  15    8.24    3.56
   6  -6  15    5.40    4.11
  -6  -6 -15    8.06    3.57
  -6   6 -15    7.97    3.44
   6   6  16    8.52    3.42
   6  -6  16    0.86    3.32
  -6  -6 -16    5.46    2.71
  -6   6 -16   -2.02    3.01
   6  -8 -16   10.64    3.32
   6   8 -16   -0.91    2.87
  -6   8  16   -0.09    3.17
  -6  -8  16    2.88    3.69
   6   8 -15   -0.25    2.57
   6  -8 -15    2.13    2.27
  -6   8  15    4.73    2.21
  -6  -8  15   -1.77    2.63
   6   8 -14   17.56    3.92
   6  -8 -14   22.29    4.28
  -6   8  14   17.10    3.49
  -6  -8  14   13.43    4.43
   6   8 -13    3.28    2.01
   6  -8 -13    0.28    2.53
  -6  -8  13   -0.07    2.75
  -6   8  13    4.39    2.49
   6   8 -12   10.92    3.12
   6  -8 -12   13.76    3.49
  -6   8  12    9.68    3.12
  -6  -8  12   12.91    3.51
   6   8 -11    0.42    1.80
   6  -8 -11    0.83    1.59
  -6   8  11    1.17    1.97
   6   8 -10    8.79    2.19
   6  -8 -10    5.14    2.28
  -6   8  10    9.61    2.56
  -6  -8  10    5.12    2.69
   6   8  -9    1.83    1.87
   6  -8  -9    3.66    1.95
  -6   8   9   -0.28    1.87
  -6  -8   9    1.21    1.78
   6   8  -8   25.65    2.89
   6   8  -8   21.38    1.67
   6  -8  -8   21.91    3.18
  -6   8   8   19.03    2.92
  -6  -8   8   24.16    3.25
   6  -8  -7   -1.04    1.70
   6   8  -7    0.51    0.73
   6   8  -7    1.60    1.29
  -6  -8   7    0.08    1.49
  -6   8   7    3.89    1.54
   6   8  -6    6.10    1.80
   6   8  -6    6.21    1.24
   6  -8  -6    8.94    2.35
  -6  -8   6    4.61    1.92
  -6   8   6    8.09    0.96
  -6   8   6    8.02    2.08
   6   8  -5    4.32    1.50
   6  -8  -5    4.18    1.51
   6   8  -5    0.02    0.82
  -6  -8   5   -0.23    1.28
  -6   8   5   -0.11    0.68
  -6   8   5    0.10    1.33
   6  -8  -4    5.17    1.48
   6   8  -4    2.90    1.55
   6   8  -4    0.86    0.86
  -6   8   4    0.25    0.86
  -6  -8   4   -0.59    1.27
  -6   8   4    2.40    1.40
   6   8  -3    2.33    0.94
   6   8  -3    2.05    1.58
   6  -8  -3    1.50    1.51
  -6  -8   3    4.02    1.30
  -6   8   3    0.74    0.90
  -6   8   3    1.31    1.18
   6   8  -2    0.23    1.24
   6   8  -2    1.13    0.84
   6  -8  -2    2.56    1.25
  -6  -8   2    0.39    1.10
  -6   8   2   -0.09    0.99
  -6   8   2    1.60    1.31
   6   8  -1    1.79    0.89
   6   8  -1   -0.51    1.04
  -6   8   1    0.19    1.00
  -6  -8   1   -0.87    0.94
   6   8   0    3.61    1.78
   6   8   0    5.38    1.44
   6  -8   0    4.98    1.16
   6   8   0    5.60    1.58
  -6   8   0    7.88    1.73
  -6   8   0    7.20    1.79
   6   8   1    1.10    1.09
   6   8   1    1.58    1.29
   6   8   1    1.21    1.19
   6  -8   1    0.45    0.67
   6  -8   1    2.32    1.44
  -6   8  -1    2.33    1.31
   6   8   2   64.66    4.16
   6  -8   2   59.71    2.40
   6   8   2   65.19    3.56
   6  -8   2   55.87    4.50
  -6  -8  -2   64.08    4.11
  -6   8  -2   71.87    4.53
   6   8   3    3.88    1.44
   6  -8   3    6.85    2.16
   6   8   3    7.24    1.86
  -6  -8  -3    6.10    1.59
  -6   8  -3    6.48    1.71
   6   8   4    0.20    1.11
   6   8   4    1.40    1.42
  -6  -8  -4    1.43    1.20
  -6   8  -4    1.17    1.54
   6   8   5    1.07    1.22
   6   8   5    0.86    1.69
   6  -8   5    3.74    1.54
  -6  -8  -5    1.23    1.05
  -6   8  -5    3.79    1.45
   6   8   6   21.51    2.52
   6  -8   6   21.50    3.38
   6   8   6   25.23    3.17
  -6  -8  -6   20.97    2.19
  -6   8  -6   24.01    3.31
   6   8   7    1.30    1.52
   6   8   7    3.07    1.53
   6  -8   7    3.90    2.11
  -6  -8  -7    1.44    1.14
  -6   8  -7    4.15    1.95
   6   8   8   31.88    3.30
   6  -8   8   29.31    4.28
  -6  -8  -8   24.69    2.07
  -6   8  -8   24.01    3.76
   6   8   9    0.67    1.18
   6  -8   9   -0.62    1.67
  -6  -8  -9   -0.48    1.33
   6   8  10   13.50    2.76
   6  -8  10    8.31    3.64
  -6  -8 -10   10.24    2.51
  -6   8 -10    9.86    2.88
   6   8  11    2.33    2.22
   6  -8  11    0.91    2.48
  -6  -8 -11    0.18    2.39
  -6   8 -11    7.32    2.58
   6   8  12    2.23    2.42
   6  -8  12    6.27    3.06
  -6  -8 -12    1.18    2.42
  -6   8 -12    0.47    2.66
   6   8  13    7.03    2.91
   6  -8  13    8.74    3.64
  -6  -8 -13    0.37    2.84
  -6   8 -13    0.97    2.87
   6   8  14    8.98    3.48
   6  -8  14    7.33    4.11
  -6  -8 -14    5.35    2.82
  -6   8 -14    5.15    2.95
   6 -10 -14    9.38    4.69
   6  10 -14   18.76    4.53
  -6 -10  14   33.37    5.35
  -6  10  14   16.16    4.62
   6  10 -13   13.92    3.41
   6 -10 -13    8.46    4.03
  -6 -10  13    9.01    4.21
  -6  10  13   14.09    4.03
   6  10 -12    5.39    2.67
   6 -10 -12    5.04    2.71
  -6 -10  12    6.87    3.47
  -6  10  12    4.64    2.60
   6 -10 -11    7.43    3.09
   6  10 -11    5.76    2.58
  -6 -10  11    2.21    3.30
  -6  10  11    8.63    2.88
   6  10 -10    0.42    1.91
   6 -10 -10   -0.04    2.47
  -6 -10  10    4.43    2.48
  -6  10  10    3.21    2.26
   6 -10  -9    0.30    1.96
   6  10  -9    0.28    1.86
  -6 -10   9    1.24    2.05
  -6  10   9    0.10    1.57
   6  10  -8   10.38    2.59
   6 -10  -8   11.03    2.87
  -6 -10   8    7.22    2.44
  -6  10   8    5.85    2.79
   6  10  -7   19.92    3.25
   6 -10  -7   27.64    3.60
  -6 -10   7   19.72    3.00
  -6  10   7   21.94    3.10
   6  10  -6   66.98    5.34
   6 -10  -6   67.50    5.47
  -6 -10   6   63.42    5.11
  -6  10   6   65.04    5.13
   6  10  -5   25.25    2.25
   6 -10  -5   27.47    3.39
   6  10  -5   26.13    3.83
  -6 -10   5   24.90    3.19
  -6  10   5   21.72    3.04
  -6  10   5   20.93    2.24
   6  10  -4   47.69    3.12
   6 -10  -4   46.38    3.91
   6  10  -4   51.62    4.41
  -6 -10   4   45.41    4.08
  -6  10   4   50.62    3.32
  -6  10   4   42.84    4.40
   6  10  -3    2.45    1.22
   6 -10  -3    4.69    1.82
   6  10  -3   -0.30    2.06
  -6 -10   3    1.41    1.78
  -6  10   3    6.71    1.98
  -6  10   3    2.58    1.46
   6  10  -2    9.19    1.70
   6  10  -2   11.62    2.46
   6 -10  -2   15.09    2.29
  -6  10   2   12.86    2.27
  -6  10   2    9.50    2.17
  -6 -10   2   13.99    2.35
   6  10  -1   15.59    2.33
   6 -10  -1   15.10    2.20
   6  10  -1   17.33    3.19
  -6 -10   1   20.83    2.56
  -6  10   1   19.27    2.62
  -6  10   1   13.35    2.55
   6  10   0   39.42    4.06
   6 -10   0   48.00    3.94
   6 -10   0   35.53    2.49
   6  10   0   40.78    3.54
  -6 -10   0   45.46    3.61
  -6  10   0   47.14    4.00
   6  10   1   21.27    3.21
   6 -10   1   30.22    3.52
   6  10   1   24.42    2.79
   6  10   1   26.57    2.96
  -6  10  -1   20.55    3.14
   6  10   2   18.65    2.72
   6  10   2   15.48    2.52
   6  10   2   15.52    2.32
   6 -10   2   20.19    3.27
  -6  10  -2   16.30    3.03
   6  10   3    2.98    1.89
   6  10   3    2.61    1.69
   6 -10   3    1.18    2.35
  -6 -10  -3    4.95    1.79
  -6  10  -3    9.29    2.31
   6  10   4    9.67    1.93
   6 -10   4    3.49    2.47
   6  10   4    1.21    2.07
  -6 -10  -4    4.92    1.78
  -6  10  -4    4.69    2.52
   6  10   5   -0.24    1.21
   6  10   5   -0.76    1.33
   6 -10   5    0.53    1.62
  -6 -10  -5   -0.10    1.02
   6  10   6   15.46    2.67
   6 -10   6   18.08    3.55
  -6 -10  -6   12.99    2.04
  -6 -10  -6   12.91    2.69
  -6  10  -6   12.98    2.75
   6 -10   7   21.02    3.93
   6  10   7   14.22    2.86
  -6 -10  -7   16.86    3.01
  -6  10  -7   17.06    3.72
   6  10   8    7.62    2.62
   6 -10   8    7.86    3.28
  -6 -10  -8    8.55    3.00
  -6  10  -8    8.37    3.12
   6 -10   9    4.37    2.68
   6  10   9    1.31    2.33
  -6 -10  -9    9.80    2.85
  -6  10  -9    5.32    2.38
   6  10  10    4.15    2.64
   6 -10  10    4.96    3.45
  -6 -10 -10    5.71    3.03
  -6  10 -10    5.56    2.46
   6  10  11    1.56    2.48
   6 -10  11   -1.40    3.21
  -6 -10 -11    6.16    2.77
  -6  10 -11    2.28    2.30
   6 -10  12   -0.96    2.75
   6  10  12    5.54    2.66
  -6  10 -12   -1.97    2.44
  -6 -10 -12    6.22    2.82
   6  12 -11    2.45    2.42
   6 -12 -11    1.45    3.24
  -6 -12  11    1.17    3.23
  -6  12  11    1.45    2.44
   6 -12 -10   -2.27    2.62
   6  12 -10   -0.44    2.24
  -6 -12  10   -2.46    2.74
  -6  12  10    0.15    2.11
   6  12  -9   -0.89    2.71
   6 -12  -9    0.57    2.79
  -6 -12   9    2.78    2.78
  -6  12   9    2.73    2.12
   6  12  -8   -0.53    2.18
   6 -12  -8    5.75    2.68
  -6 -12   8    0.65    2.49
  -6  12   8    1.90    2.42
   6  12  -7   26.70    4.22
   6 -12  -7   24.37    4.34
  -6 -12   7   27.21    4.43
  -6  12   7   30.34    4.34
   6 -12  -6    0.14    2.28
   6  12  -6    3.28    2.00
  -6 -12   6    2.13    2.55
   6  12  -5   22.79    3.72
   6 -12  -5   26.98    3.85
  -6 -12   5   18.68    3.98
  -6  12   5   22.56    3.37
   6  12  -4   -1.43    1.99
   6 -12  -4   -1.04    1.79
  -6 -12   4    1.63    1.73
  -6  12   4    1.38    1.55
   6  12  -3    2.20    2.69
   6 -12  -3    0.13    2.04
  -6 -12   3    1.25    2.27
  -6  12   3    5.18    1.66
  -6  12   3    2.81    1.90
   6  12  -2   -0.15    1.55
   6  12  -2    0.13    2.60
  -6 -12   2    4.03    2.19
  -6  12   2    5.40    2.05
  -6  12   2    4.25    2.40
   6  12  -1   17.21    2.77
   6  12  -1   16.31    3.62
  -6 -12   1   16.50    3.34
  -6  12   1   17.70    3.19
   6  12   0   -0.25    1.81
   6  12   0    1.55    2.20
   6 -12   0    1.04    1.86
  -6 -12   0    7.58    2.08
  -6  12   0    0.67    2.09
   6  12   1   31.10    4.21
   6 -12   1   34.76    4.57
  -6 -12  -1   38.58    4.32
  -6  12  -1   45.11    4.75
   6  12   2   -0.15    1.65
   6  12   2    2.10    2.05
   6 -12   2    2.65    2.31
  -6 -12  -2    4.96    2.02
  -6  12  -2    2.28    2.34
   6  12   3    6.87    2.62
   6 -12   3    4.31    2.39
  -6 -12  -3    7.99    2.39
  -6 -12  -3    3.22    2.61
  -6  12  -3    8.36    2.88
   6  12   4    1.58    2.16
   6 -12   4    6.90    2.65
  -6 -12  -4    0.46    2.01
  -6 -12  -4    2.76    2.25
  -6  12  -4    1.94    2.10
   6  12   5    0.61    1.95
   6 -12   5    0.09    1.85
  -6 -12  -5    2.51    2.21
  -6  12  -5    1.56    2.02
   6  12   6    5.87    2.19
   6 -12   6   -1.41    2.64
  -6 -12  -6    0.28    2.55
  -6  12  -6    0.75    2.20
   6  12   7   15.43    3.47
   6 -12   7   14.29    3.71
  -6 -12  -7   21.13    4.06
  -6  12  -7   11.26    4.26
   6  12   8    0.43    2.15
   6 -12   8    2.92    2.75
  -6 -12  -8   -0.43    2.48
  -6  12  -8    1.00    2.57
   6  12   9    5.60    2.61
   6 -12   9   13.50    4.22
  -6 -12  -9    6.73    3.50
  -6  12  -9    3.60    3.65
   6  14  -5   27.57    5.88
  -6 -14   5   25.67    5.21
  -6  14   5   29.84    5.48
   6  14  -4    7.39    3.57
  -6 -14   4    1.45    2.98
  -6  14   4    0.53    3.16
   6  14  -3    1.94    2.78
  -6  14   3    1.02    1.96
  -6 -14   3   -1.53    2.35
   6 -14  -2    0.33    2.72
   6  14  -2    2.20    2.86
  -6 -14   2    1.52    2.72
   6  14  -1   11.93    4.09
   6 -14  -1   17.48    4.10
  -6 -14   1    7.38    3.75
   6 -14   0    7.04    3.63
   6  14   0    5.26    3.46
  -6 -14   0   10.94    3.42
  -6  14   0    6.29    3.34
   6 -14   1   15.05    4.50
  -6 -14  -1   25.91    4.43
  -6  14  -1   17.65    4.48
   6 -14   2    4.97    3.55
  -6 -14  -2    4.71    3.31
  -6  14  -2    9.86    3.50
   6  14   3    1.77    2.53
   6 -14   3    7.42    2.88
  -6  14  -3    2.06    3.36
   7  -1 -19    0.08    2.16
   7  -1 -19   -2.76    2.79
  -7  -1  19   -0.86    2.24
  -7   1  19   -0.21    2.75
   7   1 -18    0.15    2.86
   7  -1 -18    9.06    2.98
  -7  -1  18    0.72    2.91
  -7   1  18    2.34    2.97
   7   1 -17    3.83    2.54
   7  -1 -17    5.03    2.66
  -7  -1  17    2.27    2.69
  -7   1  17   -1.43    2.13
   7   1 -16   12.96    3.24
   7   1 -16    9.85    2.09
   7  -1 -16   15.14    3.02
  -7  -1  16   11.20    3.56
  -7   1  16   17.90    3.59
   7   1 -15    3.17    2.10
   7   1 -15    2.18    1.25
   7  -1 -15    1.84    2.25
  -7  -1  15    4.69    2.34
  -7   1  15    1.35    1.93
   7   1 -14   47.37    3.33
   7   1 -14   49.43    4.30
   7  -1 -14   41.90    4.64
  -7   1  14   42.81    4.62
  -7  -1  14   45.51    4.73
   7   1 -13    1.93    1.82
   7  -1 -13    1.15    1.90
   7   1 -13    1.13    1.14
  -7  -1  13   -0.24    1.83
  -7   1  13   -0.03    1.73
  -7   1  13    1.71    0.74
   7   1 -12    5.92    1.47
   7  -1 -12    8.51    2.45
   7   1 -12    5.54    2.21
  -7   1  12    3.95    0.91
  -7  -1  12    4.52    2.31
   7   1 -11    2.53    1.40
   7   1 -11   -0.80    0.84
   7  -1 -11    0.71    1.38
  -7  -1  11   -1.30    1.12
  -7   1  11   -0.15    0.54
  -7   1  11    0.24    0.99
   7   1 -10    5.05    1.29
   7  -1 -10    6.68    1.75
   7   1 -10    4.63    2.04
  -7  -1  10    8.88    2.04
  -7   1  10    4.76    0.90
  -7   1  10   10.12    1.88
   7  -1  -9    5.92    1.72
   7   1  -9    4.62    1.66
   7   1  -9    3.87    1.16
  -7  -1   9    5.25    1.28
  -7   1   9    4.21    0.82
  -7   1   9    4.11    1.25
   7   1  -8   99.15    4.19
   7   1  -8  107.29    4.98
   7  -1  -8   94.37    5.01
  -7   1   8  101.00    3.59
  -7   1   8  105.43    4.64
  -7  -1   8  111.50    4.80
   7   1  -7   37.78    2.76
   7   1  -7   37.74    2.19
   7  -1  -7   37.10    2.96
  -7  -1   7   44.66    2.62
  -7   1   7   41.96    2.07
  -7   1   7   38.72    2.36
   7  -1  -6   61.52    3.70
   7   1  -6   62.63    3.49
  -7  -1   6   56.28    2.88
  -7   1   6   57.16    2.50
  -7   1   6   59.63    2.72
  -7  -1   6   68.10    2.92
   7  -1  -5    2.81    0.95
   7   1  -5    2.15    0.86
  -7  -1   5    2.52    0.57
  -7  -1   5    1.53    0.85
  -7   1   5    2.46    0.73
  -7   1   5    1.93    0.69
   7  -1  -4   29.49    2.22
   7   1  -4   31.03    2.16
  -7   1   4   32.54    1.88
  -7   1   4   29.86    1.48
  -7  -1   4   32.30    1.27
  -7  -1   4   30.92    1.84
   7   1  -3    9.31    1.23
   7  -1  -3    9.12    1.18
  -7  -1   3    8.08    0.48
  -7   1   3    8.20    1.11
  -7   1   3    8.11    0.65
  -7  -1   3   10.63    1.27
   7  -1  -2  258.58    7.44
   7   1  -2  265.11    7.33
  -7  -1   2  262.63    2.84
  -7   1   2  256.71    6.91
  -7   1   2  276.65    5.13
  -7  -1   2  259.98    7.34
   7  -1  -1   44.15    2.17
   7   1  -1   48.93    2.49
  -7   1   1   42.14    2.25
  -7   1   1   44.57    1.39
  -7  -1   1   44.79    2.25
   7   1   0  416.81   10.42
   7  -1   0  433.88    7.00
   7  -1   0  433.34   10.04
  -7  -1   0  423.49   10.66
  -7   1   0  443.84   10.81
   7  -1   1    4.26    0.76
   7  -1   1    4.83    0.56
   7   1   1    4.96    0.37
   7   1   1    4.50    0.95
  -7  -1  -1    5.85    0.92
  -7   1  -1    2.05    0.91
   7   1   2   10.68    0.76
   7  -1   2   13.03    0.96
   7  -1   2   11.38    1.12
   7   1   2   11.41    1.25
  -7   1  -2   10.93    1.35
  -7  -1  -2   12.76    1.37
   7  -1   3    0.47    0.70
   7  -1   3    0.70    0.58
   7   1   3    0.38    0.49
  -7  -1  -3    1.38    0.78
   7  -1   4    0.60    0.81
   7  -1   4    0.50    0.65
   7   1   4    1.55    0.69
   7   1   4    0.83    0.69
  -7  -1  -4    0.79    0.71
  -7   1  -4    0.82    0.76
   7   1   5   43.85    2.70
   7  -1   5   52.97    2.60
   7  -1   5   50.73    2.90
   7   1   5   45.72    2.64
  -7  -1  -5   46.62    2.82
  -7   1  -5   49.71    3.00
   7   1   6  160.46    6.24
   7   1   6  158.25    6.21
   7  -1   6  149.09    6.25
   7  -1   6  147.96    5.36
  -7   1  -6  155.28    6.24
  -7  -1  -6  155.99    6.01
   7   1   7   18.83    2.47
   7  -1   7   19.99    2.23
   7  -1   7   24.04    2.00
   7   1   7   21.31    1.99
  -7  -1  -7   24.24    2.15
  -7   1  -7   20.75    2.07
   7  -1   8   39.52    3.82
   7  -1   8   33.92    2.43
   7   1   8   35.08    3.39
   7   1   8   32.88    2.77
  -7   1  -8   36.25    3.14
  -7  -1  -8   33.75    2.73
   7  -1   9    0.41    2.24
   7  -1   9    4.10    1.39
   7   1   9    5.02    2.16
   7   1   9    8.15    1.60
  -7  -1  -9    4.38    1.50
  -7   1  -9    5.90    1.71
   7   1  10    6.38    1.64
   7   1  10   12.49    2.52
   7  -1  10    4.66    2.36
   7  -1  10    4.32    1.40
  -7  -1 -10    4.52    1.54
  -7   1 -10    5.67    1.77
   7   1  11    3.26    2.38
   7   1  11    1.75    1.25
   7  -1  11    6.61    2.29
  -7  -1 -11    4.05    1.43
  -7   1 -11    2.12    1.42
  -7   1 -11    2.39    1.69
   7   1  12    5.04    2.28
   7  -1  12    1.27    2.14
  -7   1 -12    3.34    1.41
  -7   1 -12   -1.14    1.60
  -7  -1 -12   -0.27    1.58
   7  -1  13   -1.14    1.69
   7   1  13   -0.86    1.68
  -7   1 -13   -0.13    1.39
  -7  -1 -13   -1.03    1.62
   7   1  14   14.24    3.72
   7  -1  14   15.80    3.31
  -7  -1 -14   11.32    2.97
  -7  -1 -14   13.34    2.53
  -7   1 -14   12.00    2.49
  -7   1 -14   15.55    2.96
   7   1  15   -1.88    2.40
   7  -1  15    2.51    2.17
  -7   1 -15   -1.13    1.82
  -7   1 -15    1.89    1.65
  -7  -1 -15    0.28    1.92
  -7  -1 -15    1.54    1.68
   7   1  16    1.81    2.32
   7  -1  16    4.33    2.61
  -7  -1 -16   -0.46    2.29
  -7   1 -16    2.29    2.24
   7   1  17    2.23    3.37
   7  -1  17    2.63    3.55
  -7  -1 -17    1.52    2.60
   7  -3 -19    8.99    4.00
  -7  -3  19    2.91    3.34
   7  -3 -18    7.61    2.96
  -7  -3  18    0.14    2.98
  -7   3  18   -2.11    1.97
   7   3 -17    0.47    2.21
   7   3 -17    5.21    2.06
   7  -3 -17   -2.80    2.73
  -7  -3  17    0.76    2.92
  -7   3  17    1.03    2.04
   7   3 -16    2.07    2.28
   7   3 -16    2.63    2.44
   7  -3 -16    7.42    3.14
  -7  -3  16    8.22    2.67
  -7   3  16    5.69    2.67
   7   3 -15   19.95    3.05
   7   3 -15   24.04    3.44
   7  -3 -15   24.89    4.36
  -7  -3  15   16.36    4.16
  -7   3  15   22.80    3.80
   7   3 -14    2.89    1.75
   7   3 -14    0.27    1.48
   7  -3 -14    0.08    2.27
  -7  -3  14    0.13    2.23
  -7   3  14    2.48    1.57
   7   3 -13   29.59    3.48
   7   3 -13   25.29    3.01
   7  -3 -13   36.90    3.87
  -7  -3  13   36.51    3.65
  -7   3  13   26.56    3.58
   7   3 -12    3.78    1.75
   7   3 -12    4.98    2.02
   7  -3 -12    7.55    2.23
  -7  -3  12    4.98    2.34
  -7   3  12    7.77    2.06
   7   3 -11    5.18    2.07
   7   3 -11    7.81    1.78
   7  -3 -11    6.13    2.54
  -7  -3  11   10.63    2.35
  -7   3  11    4.57    1.89
   7   3 -10    7.73    1.80
   7  -3 -10    8.35    2.13
  -7  -3  10    7.78    2.21
  -7   3  10    6.13    0.74
  -7   3  10    8.91    1.63
   7   3  -9   22.89    2.16
   7   3  -9   22.00    2.47
   7  -3  -9   24.65    2.94
  -7  -3   9   23.10    2.57
  -7   3   9   16.21    1.14
  -7   3   9   21.22    2.38
   7   3  -8    7.69    1.60
   7   3  -8    7.67    1.55
   7  -3  -8    7.86    1.78
  -7  -3   8    5.64    1.56
  -7   3   8    5.89    0.67
  -7   3   8    6.08    1.27
   7   3  -7   16.27    1.85
   7   3  -7   17.33    1.86
   7  -3  -7   20.08    2.47
  -7  -3   7   18.03    1.83
  -7   3   7   16.44    1.16
  -7   3   7   17.47    1.77
   7   3  -6    3.63    1.09
   7   3  -6    3.34    1.09
   7  -3  -6    3.29    1.45
  -7  -3   6    1.59    1.05
  -7   3   6    3.15    1.01
  -7   3   6    2.52    0.67
   7   3  -5    1.07    0.80
   7   3  -5   -0.28    0.69
   7  -3  -5    1.72    1.06
  -7  -3   5    0.14    0.60
  -7   3   5    0.28    0.52
  -7   3   5    2.29    0.77
   7   3  -4   -0.60    0.65
   7   3  -4    0.80    0.58
   7  -3  -4   -0.30    0.73
  -7  -3   4    0.04    0.36
  -7   3   4   -0.66    0.53
  -7   3   4    0.05    0.44
   7   3  -3    7.19    1.21
   7  -3  -3    8.73    1.50
  -7  -3   3    6.49    0.59
  -7  -3   3    6.61    1.09
  -7   3   3    6.23    1.01
  -7   3   3    9.23    1.00
   7   3  -2   30.39    1.99
   7  -3  -2   28.50    2.13
  -7  -3   2   29.25    0.98
  -7  -3   2   27.57    1.90
  -7   3   2   27.26    1.65
  -7   3   2   26.91    1.82
   7   3  -1   42.05    2.43
   7  -3  -1   44.25    2.39
  -7  -3   1   42.95    1.03
  -7  -3   1   47.58    2.61
  -7   3   1   40.78    1.94
  -7   3   1   47.77    2.43
   7   3   0    2.65    1.00
   7   3   0    2.24    0.28
   7  -3   0    4.48    0.87
  -7  -3   0    2.24    1.02
  -7   3   0    3.46    0.64
  -7   3   0    3.20    0.96
   7   3   1  139.11    5.19
   7   3   1  133.81    2.67
   7  -3   1  134.00    4.37
   7  -3   1  138.86    4.36
  -7  -3  -1  136.07    5.10
  -7   3  -1  137.89    5.18
   7   3   2    1.54    0.94
   7   3   2    1.85    0.36
   7  -3   2    2.13    0.65
   7  -3   2    2.24    0.87
  -7  -3  -2    3.27    0.83
  -7   3  -2    0.54    0.83
   7   3   3    2.29    0.45
   7   3   3    1.33    1.04
   7  -3   3    1.88    0.94
   7  -3   3    2.60    0.64
  -7   3  -3    0.69    0.85
   7   3   4    2.44    0.98
   7   3   4    0.24    0.60
   7  -3   4    1.28    0.99
   7  -3   4    1.83    0.54
  -7  -3  -4    0.38    0.85
  -7   3  -4    1.51    0.89
   7   3   5   26.34    2.35
   7   3   5   25.35    1.64
   7  -3   5   23.18    2.38
   7  -3   5   26.06    1.49
  -7  -3  -5   26.50    2.09
  -7   3  -5   27.60    2.50
   7   3   6    8.69    1.54
   7   3   6    9.91    1.41
   7  -3   6    6.34    2.06
   7  -3   6   10.10    1.05
  -7  -3  -6   12.60    1.57
  -7   3  -6    8.42    1.80
   7   3   7   56.08    3.52
   7   3   7   55.76    3.40
   7  -3   7   49.45    3.92
   7  -3   7   58.48    2.69
  -7  -3  -7   54.86    3.10
  -7   3  -7   52.01    3.58
   7   3   8   13.20    1.81
   7   3   8    8.09    1.96
   7  -3   8   10.28    1.23
   7  -3   8   10.24    2.62
  -7  -3  -8   11.32    1.50
  -7   3  -8   11.40    1.87
   7  -3   9    5.27    2.65
   7  -3   9    8.00    1.12
   7   3   9    9.70    2.06
   7   3   9   17.62    2.19
  -7  -3  -9    7.95    1.39
  -7   3  -9    8.53    2.20
   7  -3  10    2.38    2.10
   7   3  10    0.53    1.46
   7   3  10    2.37    1.54
  -7   3 -10    0.39    0.89
  -7   3 -10    2.36    1.55
   7  -3  11   -1.64    1.96
   7   3  11    0.43    1.21
   7   3  11   -1.32    1.59
  -7   3 -11    4.36    1.39
   7  -3  12   -2.15    2.66
   7   3  12    2.04    2.11
  -7   3 -12    4.00    1.20
  -7   3 -12   -0.33    1.94
  -7  -3 -12    3.16    1.28
  -7  -3 -12    1.23    1.61
   7   3  13    5.28    2.51
   7  -3  13    9.32    3.07
  -7   3 -13    7.03    2.30
  -7  -3 -13    1.67    1.24
  -7  -3 -13    0.23    2.25
   7  -3  14    1.79    2.36
   7   3  14    1.96    2.74
  -7   3 -14    6.71    2.26
  -7  -3 -14   -1.31    2.44
   7  -3  15    1.61    3.21
   7   3  15    2.39    2.65
  -7   3 -15    1.98    2.66
  -7  -3 -15   10.69    2.84
   7  -3  16    1.49    2.49
   7   3  16    1.80    2.80
  -7   3 -16   -0.38    2.31
  -7  -3 -16    2.08    2.36
   7   3  17    0.92    3.10
  -7  -3 -17    0.43    2.09
   7   5 -18    0.25    2.37
  -7  -5  18   -2.87    3.02
  -7   5  18   -0.67    2.63
   7   5 -17   -0.84    2.05
   7  -5 -17    0.46    2.14
  -7  -5  17   -2.42    2.48
  -7   5  17    0.80    2.21
   7   5 -16    1.14    2.01
   7  -5 -16    5.10    2.89
  -7  -5  16    0.94    2.59
  -7   5  16   -0.94    2.35
   7   5 -15    6.65    2.76
   7   5 -15    7.34    2.40
   7  -5 -15    7.38    3.33
  -7  -5  15   17.22    3.60
  -7   5  15    8.67    2.60
   7   5 -14   -0.71    1.88
   7  -5 -14    4.97    2.08
   7   5 -14    3.90    2.09
  -7  -5  14    5.77    2.58
  -7   5  14    3.27    2.34
   7   5 -13   26.71    3.53
   7   5 -13   31.19    3.06
   7  -5 -13   25.07    3.64
  -7  -5  13   29.80    3.58
  -7   5  13   22.80    3.85
   7   5 -12    1.29    1.35
   7  -5 -12    3.07    2.05
   7   5 -12    2.68    1.76
  -7  -5  12    5.24    2.19
  -7   5  12    0.74    1.49
   7   5 -11   12.24    2.64
   7   5 -11   12.67    1.83
   7  -5 -11   17.16    3.09
  -7  -5  11   16.84    3.20
  -7   5  11   15.23    2.68
   7   5 -10    2.50    1.24
   7  -5 -10    1.19    1.61
   7   5 -10    1.14    1.31
  -7  -5  10    3.37    1.65
  -7   5  10    4.27    1.68
   7   5  -9   49.28    3.89
   7   5  -9   42.65    2.96
   7  -5  -9   46.88    4.25
  -7  -5   9   48.26    3.80
  -7   5   9   48.22    3.55
   7   5  -8   21.47    2.67
   7   5  -8   19.19    2.04
   7  -5  -8   28.77    3.25
  -7  -5   8   19.86    2.52
  -7   5   8   22.34    2.27
  -7   5   8   18.10    1.02
   7   5  -7   99.03    4.41
   7   5  -7   90.35    5.02
   7  -5  -7  104.95    6.03
  -7  -5   7   93.84    4.69
  -7   5   7   91.33    4.94
  -7   5   7   92.32    2.90
   7   5  -6    7.21    1.40
   7   5  -6   10.32    2.01
   7  -5  -6    6.34    2.12
  -7  -5   6    8.22    1.43
  -7   5   6    8.48    0.84
  -7   5   6    7.99    1.69
   7   5  -5   58.23    3.77
   7   5  -5   56.72    3.10
   7  -5  -5   54.20    3.84
  -7  -5   5   58.28    2.94
  -7   5   5   54.02    3.33
  -7   5   5   55.51    2.42
   7   5  -4    0.78    1.10
   7   5  -4   -0.21    0.78
   7  -5  -4   -0.01    1.14
  -7  -5   4    0.27    0.63
  -7   5   4    2.00    0.67
  -7   5   4   -0.04    0.71
   7   5  -3   24.72    2.17
   7   5  -3   21.69    1.75
   7  -5  -3   20.44    2.17
  -7  -5   3   22.95    1.41
  -7   5   3   21.07    1.65
  -7   5   3   24.36    1.85
   7   5  -2   10.74    1.78
   7   5  -2   13.38    1.33
   7  -5  -2   13.36    1.76
  -7  -5   2   14.30    1.02
  -7   5   2   13.52    1.53
  -7   5   2   12.42    1.46
   7   5  -1  274.29    8.66
   7  -5  -1  272.88    8.15
  -7  -5   1  270.73    6.17
  -7   5   1  262.60    8.50
  -7   5   1  267.39    8.32
   7   5   0   24.82    1.28
   7   5   0   24.84    2.13
   7  -5   0   22.26    1.72
  -7  -5   0   19.91    2.15
  -7   5   0   23.61    2.10
  -7   5   0   24.97    2.11
   7   5   1  100.86    3.15
   7   5   1  108.20    4.73
   7  -5   1  104.01    4.47
   7  -5   1  102.93    3.72
  -7  -5  -1  103.47    4.78
  -7   5  -1  104.38    4.61
   7   5   2    2.37    0.87
   7   5   2    0.11    0.41
   7  -5   2    0.34    0.46
   7  -5   2   -0.31    0.86
  -7  -5  -2   -0.84    0.91
  -7   5  -2   -0.71    0.94
   7   5   3    3.55    1.05
   7   5   3   -0.23    0.54
  -7  -5  -3    0.73    1.02
  -7   5  -3    2.40    0.97
   7   5   4    0.46    0.63
   7  -5   4    0.30    0.34
   7  -5   4   -0.51    1.03
  -7  -5  -4    0.52    0.89
  -7   5  -4    0.02    1.09
   7  -5   5   79.05    2.60
   7   5   5   78.56    3.52
   7  -5   5   77.06    4.51
   7   5   5   79.83    4.58
  -7  -5  -5   87.31    4.19
  -7   5  -5   79.69    4.92
   7  -5   6    4.42    1.63
   7   5   6    3.09    1.57
   7   5   6    4.65    1.21
   7  -5   6    3.30    0.61
  -7  -5  -6    3.20    1.18
  -7   5  -6    1.67    1.67
   7   5   7   46.35    3.58
   7   5   7   51.09    3.11
   7  -5   7   49.52    4.08
   7  -5   7   42.91    1.81
  -7  -5  -7   55.04    3.01
  -7   5  -7   53.75    4.39
   7   5   8    3.81    1.68
   7   5   8    1.78    1.48
   7  -5   8    4.08    2.30
  -7  -5  -8    3.47    1.14
  -7   5  -8    3.07    1.50
   7   5   9    6.23    2.15
   7   5   9    3.95    1.75
   7  -5   9    5.04    2.52
  -7  -5  -9    5.35    1.28
  -7   5  -9    3.03    2.10
   7   5  10    2.47    1.50
   7   5  10   -0.29    1.23
   7  -5  10    1.36    1.62
  -7  -5 -10   -0.23    0.93
  -7   5 -10    2.11    1.65
   7   5  11    4.02    1.86
   7  -5  11   12.09    3.03
  -7  -5 -11    4.59    2.50
  -7  -5 -11    6.93    1.34
  -7   5 -11    6.02    2.55
   7   5  12    1.94    1.91
   7  -5  12    0.23    2.50
  -7  -5 -12    2.54    1.98
  -7   5 -12    0.00    2.12
   7   5  13    0.85    2.31
   7  -5  13    6.74    2.91
  -7  -5 -13    2.14    1.88
  -7   5 -13   -0.46    2.44
   7   5  14    0.80    2.45
   7  -5  14    2.00    2.95
  -7  -5 -14    2.26    2.40
  -7   5 -14    1.33    2.41
   7   5  15    2.55    2.48
   7  -5  15    1.52    3.04
  -7  -5 -15   -0.79    2.37
  -7   5 -15   -0.09    1.95
   7   5  16    5.35    2.42
   7  -5  16   -0.80    2.88
  -7  -5 -16    0.08    2.20
  -7   5 -16    1.19    2.86
   7   7 -17    1.65    2.59
   7  -7 -17   -0.89    2.80
  -7  -7  17    2.95    2.40
  -7   7  17   -1.44    2.48
   7   7 -16    5.74    3.26
   7  -7 -16    9.56    3.69
  -7   7  16    6.03    3.42
  -7  -7  16    4.98    3.62
   7  -7 -15    7.63    2.80
   7   7 -15    1.63    2.81
  -7  -7  15    5.79    3.65
  -7   7  15   11.25    2.74
   7  -7 -14   20.86    4.18
   7   7 -14   19.26    3.88
  -7  -7  14   20.56    4.74
  -7   7  14   16.57    3.48
   7   7 -13   -0.20    1.97
   7  -7 -13    2.89    2.16
  -7   7  13   -0.17    1.60
   7   7 -12    5.66    2.56
   7  -7 -12    2.96    2.23
  -7  -7  12    5.76    2.71
  -7   7  12    6.69    2.69
   7   7 -11    1.19    1.90
   7   7 -11    0.94    1.04
   7  -7 -11    2.77    1.80
  -7  -7  11    6.55    2.21
  -7   7  11    1.67    2.08
   7   7 -10    1.89    2.09
   7   7 -10    2.22    1.32
   7  -7 -10    6.36    1.91
  -7  -7  10    4.77    2.14
  -7   7  10    6.31    2.14
   7   7  -9    4.62    2.30
   7   7  -9    6.26    1.43
   7  -7  -9    6.09    2.43
  -7  -7   9    6.78    2.30
  -7   7   9    7.51    1.92
   7   7  -8   28.33    3.13
   7   7  -8   30.18    2.28
   7  -7  -8   31.32    3.76
  -7  -7   8   35.71    3.28
  -7   7   8   27.40    3.37
   7   7  -7   18.70    2.00
   7   7  -7   16.06    2.45
   7  -7  -7   20.67    2.97
  -7  -7   7   20.74    2.63
  -7   7   7   18.61    1.40
  -7   7   7   18.88    2.33
   7   7  -6   55.19    2.99
   7   7  -6   61.23    4.55
   7  -7  -6   58.94    4.85
  -7   7   6   58.68    4.30
  -7  -7   6   53.63    3.76
  -7   7   6   51.82    2.47
   7   7  -5   13.96    2.21
   7   7  -5   13.34    1.59
   7  -7  -5   14.76    2.50
  -7  -7   5   11.99    1.89
  -7   7   5   14.25    2.20
  -7   7   5   12.21    1.36
   7   7  -4    4.90    1.58
   7   7  -4    6.13    1.28
   7  -7  -4    5.55    1.79
  -7  -7   4    3.13    1.37
  -7   7   4    4.22    1.35
  -7   7   4    2.21    0.97
   7   7  -3    7.31    1.50
   7   7  -3   10.79    2.23
   7  -7  -3    7.31    1.83
  -7  -7   3    8.84    1.31
  -7   7   3    6.71    1.73
  -7   7   3    7.74    1.43
   7   7  -2   72.97    3.75
   7   7  -2   63.45    4.50
   7  -7  -2   62.85    3.64
  -7  -7   2   69.92    3.36
  -7   7   2   65.90    3.93
  -7   7   2   69.82    3.82
   7   7  -1   29.30    2.94
   7   7  -1   33.91    2.70
   7  -7  -1   27.73    2.31
  -7  -7   1   32.31    2.20
  -7   7   1   29.15    2.83
  -7   7   1   33.32    2.77
   7   7   0  156.72    6.49
   7   7   0  169.07    5.81
   7   7   0  152.75    6.81
   7  -7   0  156.67    5.67
  -7   7   0  156.52    7.03
  -7   7   0  157.50    7.21
   7   7   1   15.57    2.08
   7   7   1   12.32    1.38
   7  -7   1   13.83    1.26
   7  -7   1   15.80    2.25
  -7  -7  -1   12.21    2.09
  -7   7  -1   17.33    2.30
   7   7   2   20.85    2.37
   7   7   2   20.49    1.77
   7  -7   2   18.41    1.27
   7  -7   2   23.46    2.65
  -7  -7  -2   20.23    2.36
  -7   7  -2   22.82    2.67
   7   7   3    4.70    1.50
   7   7   3    1.44    1.03
   7  -7   3    1.54    1.38
   7  -7   3    2.14    0.59
  -7  -7  -3    4.46    1.36
  -7   7  -3    2.01    1.33
   7   7   4   18.00    2.53
   7   7   4   16.98    1.78
   7  -7   4   16.05    2.34
  -7  -7  -4   15.38    2.05
  -7   7  -4   17.69    2.37
   7   7   5   -0.69    1.56
   7   7   5    1.27    1.13
   7  -7   5    3.75    1.52
  -7   7  -5    3.02    1.43
  -7  -7  -5    2.58    1.23
   7   7   6   37.26    3.73
   7   7   6   35.17    2.95
   7  -7   6   43.03    4.35
  -7  -7  -6   41.35    3.08
  -7   7  -6   42.91    3.73
   7   7   7    4.93    2.12
   7   7   7    4.27    1.72
   7  -7   7    4.83    2.09
  -7  -7  -7    6.40    1.33
  -7   7  -7    6.67    2.30
   7   7   8   12.74    2.26
   7   7   8    8.56    2.22
   7  -7   8   10.85    3.08
  -7  -7  -8   11.76    1.54
  -7   7  -8   12.53    2.87
   7   7   9    4.72    1.73
   7   7   9    1.29    1.88
   7  -7   9    4.71    2.06
  -7  -7  -9    0.90    1.07
  -7   7  -9    2.11    2.03
   7   7  10    5.48    1.92
   7  -7  10    2.42    2.29
  -7  -7 -10    2.62    1.96
  -7   7 -10   -0.96    2.24
   7   7  11    2.25    2.20
   7  -7  11    1.34    2.83
  -7  -7 -11   -1.27    2.32
  -7   7 -11    7.97    2.51
   7   7  12    2.92    2.11
   7  -7  12    0.55    2.57
  -7  -7 -12    1.41    2.34
  -7   7 -12   -0.18    1.98
   7   7  13    0.81    1.91
   7  -7  13   -0.04    2.01
  -7  -7 -13   -0.69    2.10
  -7   7 -13    1.09    2.27
   7   7  14    7.48    2.90
   7  -7  14   -0.95    2.85
  -7  -7 -14   -0.89    2.24
  -7   7 -14    9.19    3.20
   7   7  15    2.18    2.65
   7  -7  15   -0.58    2.47
  -7  -7 -15    1.78    2.63
  -7   7 -15    0.02    2.67
   7   9 -15    5.92    2.74
   7  -9 -15    0.93    3.50
  -7  -9  15    2.04    3.60
  -7   9  15    1.73    3.22
   7   9 -14   14.92    4.28
   7  -9 -14   12.85    4.58
  -7  -9  14   16.80    4.64
  -7   9  14   19.68    4.33
   7   9 -13    3.63    2.64
   7  -9 -13    2.81    2.27
  -7  -9  13   -0.48    2.79
  -7   9  13    0.13    2.69
   7   9 -12    8.29    3.04
   7  -9 -12    6.89    3.28
  -7  -9  12    6.65    3.22
  -7   9  12    4.37    2.52
   7   9 -11    1.39    2.04
   7  -9 -11   -1.22    2.27
  -7   9  11   -1.83    1.81
   7   9 -10    0.31    1.41
   7  -9 -10   -0.36    1.76
  -7  -9  10   -1.63    1.74
  -7   9  10    0.61    1.28
   7   9  -9   -0.54    2.16
   7  -9  -9    3.37    2.32
  -7  -9   9    4.43    2.16
  -7   9   9    2.32    2.08
   7   9  -8   60.36    5.08
   7  -9  -8   62.87    5.54
  -7  -9   8   61.35    5.22
  -7   9   8   53.81    5.14
   7   9  -7   -0.43    1.66
   7   9  -7    3.65    1.11
   7  -9  -7   -1.20    1.99
  -7  -9   7    5.10    1.94
  -7   9   7    3.32    1.87
   7   9  -6   54.75    3.21
   7   9  -6   49.22    4.55
   7  -9  -6   55.28    4.34
  -7  -9   6   53.38    4.24
  -7   9   6   60.91    4.57
  -7   9   6   51.77    2.88
   7   9  -5    4.59    1.35
   7   9  -5    6.06    2.12
   7  -9  -5    8.98    2.28
  -7  -9   5    2.57    1.51
  -7   9   5    3.31    1.14
  -7   9   5    3.07    2.08
   7   9  -4    1.13    1.11
   7   9  -4   -0.02    2.21
   7  -9  -4    4.39    1.87
  -7  -9   4    1.85    1.25
  -7   9   4    3.44    1.31
  -7   9   4    5.51    1.56
   7   9  -3   -0.01    2.03
   7   9  -3    3.08    1.33
   7  -9  -3    1.03    1.69
  -7  -9   3    4.41    1.49
  -7   9   3    3.50    1.49
  -7   9   3    1.48    1.48
   7   9  -2   65.42    5.06
   7   9  -2   63.97    4.11
   7  -9  -2   61.80    4.10
  -7  -9   2   64.50    4.10
  -7   9   2   60.22    4.51
  -7   9   2   69.74    4.20
   7   9  -1    4.01    2.16
   7   9  -1    4.07    1.64
   7  -9  -1    6.08    1.34
  -7  -9   1    5.66    1.60
  -7   9   1    2.38    2.02
  -7   9   1    7.47    1.83
   7   9   0  131.14    6.75
   7   9   0  127.13    7.11
   7  -9   0  127.32    5.26
  -7   9   0  132.99    7.03
   7   9   1    2.83    1.12
   7   9   1   -1.30    1.27
   7  -9   1   -0.04    0.67
   7  -9   1    2.25    1.57
  -7   9  -1   -0.24    1.46
   7   9   2    3.38    1.79
   7   9   2    2.80    1.46
   7  -9   2    2.47    2.03
  -7  -9  -2    7.45    1.79
  -7   9  -2    2.20    1.91
   7   9   3    8.93    1.95
   7   9   3    9.16    1.88
   7  -9   3   12.36    2.32
  -7  -9  -3   11.56    2.19
  -7   9  -3   12.22    2.45
   7   9   4    5.09    1.96
   7   9   4    4.46    1.53
   7  -9   4    4.93    2.32
  -7  -9  -4    3.33    1.68
  -7   9  -4    3.28    2.09
   7   9   5    2.98    1.63
   7   9   5    1.14    1.21
   7  -9   5    0.55    1.78
  -7  -9  -5   -0.47    1.27
  -7   9  -5   -0.68    1.80
   7   9   6   29.40    3.45
   7   9   6   28.45    3.10
   7  -9   6   26.27    3.72
  -7  -9  -6   25.32    2.78
  -7   9  -6   33.16    3.63
   7   9   7   -0.61    1.28
   7   9   7    1.00    1.30
   7  -9   7    0.08    1.48
  -7  -9  -7   -0.03    0.95
  -7   9  -7   -1.26    1.33
   7   9   8   15.95    2.81
   7  -9   8   17.23    3.81
  -7   9  -8   12.17    3.75
   7   9   9   -1.21    1.67
   7  -9   9   -1.90    2.30
  -7  -9  -9    1.51    2.02
  -7   9  -9   -0.86    1.79
   7   9  10    2.88    2.19
   7  -9  10   -1.09    2.32
  -7  -9 -10    1.05    2.50
  -7   9 -10    5.96    2.28
   7   9  11    0.03    2.02
   7  -9  11   -1.29    2.63
  -7  -9 -11   -1.75    1.71
  -7   9 -11    1.61    2.22
   7   9  12    1.41    2.07
   7  -9  12    3.08    2.78
  -7  -9 -12    1.57    2.21
  -7   9 -12    1.53    2.75
   7   9  13    5.34    3.00
  -7  -9 -13   -0.47    3.04
  -7   9 -13    6.12    2.90
   7  11 -12   -1.04    2.44
   7 -11 -12    1.74    2.58
  -7 -11  12    1.10    2.71
  -7  11  12    0.10    2.43
   7  11 -11    0.92    2.53
   7 -11 -11   -1.00    2.82
  -7 -11  11   -0.16    2.15
  -7  11  11    5.77    2.61
   7  11 -10    4.88    2.44
  -7 -11  10    1.88    2.97
  -7  11  10    2.71    2.64
   7  11  -9    6.10    3.21
   7 -11  -9    7.60    3.18
  -7 -11   9    5.63    3.34
  -7  11   9    8.02    3.12
   7  11  -8   11.96    3.45
   7 -11  -8    8.19    3.28
  -7 -11   8    7.88    3.02
  -7  11   8    7.19    2.69
   7  11  -7   16.52    3.35
   7 -11  -7   19.29    3.78
  -7 -11   7   19.04    3.67
  -7  11   7   18.04    3.69
   7 -11  -6    4.54    2.84
   7  11  -6    5.32    2.76
  -7 -11   6    7.50    2.48
  -7  11   6    5.09    2.67
   7  11  -5    7.32    2.98
   7 -11  -5    7.03    2.79
  -7 -11   5    5.01    2.47
  -7  11   5    6.66    2.66
   7  11  -4   -0.02    1.18
   7  11  -4    1.51    2.03
   7 -11  -4    3.50    2.02
  -7 -11   4   10.07    1.94
  -7  11   4    0.47    1.54
  -7  11   4   -1.44    2.15
   7  11  -3    1.23    1.97
   7  11  -3    1.36    1.55
  -7 -11   3    4.53    2.01
  -7  11   3    1.90    1.71
  -7  11   3    3.40    2.19
   7  11  -2    7.32    1.86
   7 -11  -2    8.38    1.90
   7  11  -2    9.84    2.38
  -7 -11   2    6.60    2.50
  -7  11   2    8.59    2.27
  -7  11   2    9.66    2.83
   7  11  -1   39.17    3.62
   7  11  -1   35.33    4.42
  -7 -11   1   34.98    3.83
  -7  11   1   33.47    3.37
  -7  11   1   35.17    3.93
   7  11   0   12.43    3.07
   7 -11   0   15.18    3.16
   7  11   0    8.76    2.49
  -7 -11   0   18.15    2.80
  -7  11   0   13.78    2.86
   7  11   1   20.51    3.24
   7  11   1   22.27    2.99
   7 -11   1   22.83    3.75
  -7  11  -1   24.10    3.53
   7  11   2    1.88    2.04
   7  11   2    3.75    1.93
   7 -11   2    4.41    1.97
  -7 -11  -2    0.76    2.06
  -7  11  -2    5.90    1.91
   7  11   3    0.60    1.66
   7 -11   3   -1.70    1.66
   7  11   3    1.88    1.80
  -7 -11  -3    1.29    1.66
  -7  11  -3    3.96    2.00
   7  11   4   -0.02    1.47
   7  11   4    1.78    1.59
  -7 -11  -4    0.93    1.58
  -7  11  -4   -0.99    2.06
   7  11   5    8.63    2.46
   7  11   5    8.95    2.60
   7 -11   5   10.62    3.37
  -7 -11  -5    7.88    2.15
  -7  11  -5   14.34    2.94
   7  11   6   14.84    2.97
   7 -11   6   12.86    3.28
  -7 -11  -6   10.70    3.46
  -7  11  -6   12.98    3.72
   7  11   7   13.94    3.39
   7 -11   7   22.78    4.50
  -7 -11  -7   22.00    4.01
  -7  11  -7   17.02    4.04
   7  11   8    0.23    2.07
   7 -11   8    0.92    2.21
  -7 -11  -8   -0.25    2.44
  -7  11  -8    4.04    2.59
   7  11   9   -0.15    1.90
   7 -11   9   -0.92    2.69
  -7 -11  -9   -0.15    1.83
  -7  11  -9    2.21    1.98
   7  11  10   -0.78    2.31
   7 -11  10    2.49    2.58
  -7 -11 -10    1.21    2.64
  -7  11 -10    1.26    2.19
   7  13  -8    2.95    2.90
   7 -13  -8    2.81    2.97
  -7 -13   8    0.22    2.75
  -7  13   8   -1.36    2.52
   7  13  -7   10.73    3.55
   7 -13  -7   12.35    4.11
  -7 -13   7   12.61    3.78
  -7  13   7    7.04    3.71
   7  13  -6    2.84    3.43
  -7 -13   6    6.22    2.96
  -7  13   6    1.92    2.34
   7  13  -5    6.91    3.28
  -7 -13   5   -0.33    2.82
  -7  13   5    6.16    3.13
   7  13  -4   -0.47    2.59
  -7 -13   4    5.75    2.43
  -7  13   4    0.86    2.63
   7  13  -3    4.81    3.26
  -7 -13   3    2.79    2.97
  -7  13   3   10.68    3.20
   7  13  -2    6.71    2.84
  -7 -13   2   -0.22    2.33
  -7  13   2    0.84    2.34
   7  13  -1   11.33    3.38
   7 -13  -1    6.09    3.24
  -7 -13   1    6.99    2.53
  -7  13   1    2.48    2.57
   7  13   0    0.18    2.58
  -7 -13   0    1.24    2.43
  -7  13   0    7.68    2.73
   7 -13   1   10.46    2.91
  -7 -13  -1    7.02    2.89
  -7 -13  -1    5.70    2.76
  -7  13  -1    7.49    3.34
   7 -13   2    1.79    2.12
  -7 -13  -2    0.81    2.14
  -7 -13  -2    3.51    2.16
  -7 -13  -2   -0.70    2.06
  -7  13  -2    0.93    2.13
   7  13   3    6.54    2.39
   7 -13   3   -0.66    2.67
  -7 -13  -3    0.96    2.33
  -7  13  -3   -2.42    2.50
   7  13   4    0.05    1.82
   7 -13   4    1.72    2.09
  -7 -13  -4   -1.41    1.84
  -7  13  -4   -0.21    2.05
   7  13   5    5.32    2.34
   7 -13   5   -1.54    2.23
  -7 -13  -5    1.06    2.52
  -7  13  -5   -0.29    2.76
   7 -13   6    1.46    2.88
  -7 -13  -6   -1.60    2.52
  -7  13  -6    3.09    2.83
   8   0 -19   -1.77    3.32
  -8   0  19    6.91    3.26
   8   0 -18    3.47    2.23
  -8   0  18    1.41    3.08
   8   0 -17   -0.12    2.15
  -8   0  17    1.87    2.37
   8   0 -16   10.56    2.99
  -8   0  16    3.86    2.97
   8   0 -15    2.42    2.19
  -8   0  15    1.74    1.78
   8   0 -14   27.02    3.74
  -8   0  14   22.37    3.69
  -8   0  14   25.74    2.36
   8   0 -13    1.07    1.45
  -8   0  13   -1.10    1.35
   8   0 -12   22.37    3.38
  -8   0  12   16.21    1.92
  -8   0  12   24.47    2.85
   8   0 -11    2.82    1.67
  -8   0  11   -0.11    0.81
  -8   0  11   -0.42    1.24
   8   0 -10   21.49    3.12
  -8   0  10   18.70    2.48
  -8   0  10   19.31    1.88
   8   0  -9   -0.48    1.22
  -8   0   9    0.00    0.69
   8   0  -8  150.83    6.97
  -8   0   8  158.19    5.63
  -8   0   8  160.27    5.95
   8   0  -7   -0.20    0.92
  -8   0   7    0.02    0.68
  -8   0   7   -0.32    0.67
   8   0  -6   61.12    3.84
  -8   0   6   66.40    3.11
  -8   0   6   61.95    2.58
   8   0  -5    0.32    0.96
  -8   0   5    0.25    0.46
   8   0  -4   34.49    2.32
  -8   0   4   34.55    2.25
  -8   0   4   37.05    1.39
   8   0  -3   -0.15    0.77
  -8   0   3    0.27    0.71
  -8   0   3    0.22    0.27
   8   0  -2  190.24    6.30
  -8   0   2  189.64    6.08
  -8   0   2  183.84    3.16
   8   0  -1   -0.54    0.51
   8   0  -1   -0.06    0.13
  -8   0   1    2.00    0.63
   8   0   0  272.47    7.72
   8   0   0  256.59    3.90
  -8   0   0  264.61    7.73
   8   0   1    0.36    0.34
   8   0   1    0.89    0.74
  -8   0  -1   -0.11    0.61
   8   0   2    4.86    0.61
   8   0   2    2.08    0.82
  -8   0  -2    3.36    1.22
   8   0   3   -0.15    0.48
   8   0   3    0.54    0.56
  -8   0  -3    0.55    0.68
   8   0   4  251.74    7.32
   8   0   4  233.99    7.61
  -8   0  -4  226.18    7.87
   8   0   5    0.12    0.96
  -8   0  -5    2.71    1.15
   8   0   6   31.90    2.46
   8   0   6   36.66    2.86
  -8   0  -6   37.44    2.88
   8   0   7    0.44    0.85
   8   0   7    0.97    1.20
  -8   0  -7   -0.64    1.06
   8   0   8   -0.67    1.52
   8   0   8   -0.83    1.08
  -8   0  -8    3.30    1.02
  -8   0  -9   -0.01    0.79
   8   0  10   17.60    3.04
   8   0  10   14.27    2.21
  -8   0 -10   12.23    2.31
   8   0  11   -0.90    1.15
   8   0  11    0.34    1.75
  -8   0 -11    1.59    1.24
   8   0  12    7.20    3.23
  -8   0 -12   11.20    2.44
  -8   0 -12    9.90    2.36
  -8   0 -13    1.49    1.43
  -8   0 -13   -0.97    1.40
   8   0  14    2.11    2.93
  -8   0 -14    1.92    1.93
  -8   0 -14    2.27    1.97
   8   0  15   -2.86    2.36
  -8   0 -15    0.53    1.64
  -8   0 -15    0.44    1.64
   8   0  16    1.30    3.36
  -8   0 -16    2.09    2.27
   8   0  17   -1.14    2.86
   8  -2 -19   -2.84    2.57
  -8   2  19    1.03    2.21
   8  -2 -18    1.25    2.75
   8   2 -18   -1.09    2.53
  -8   2  18    1.37    2.73
  -8  -2  18    6.17    2.83
   8  -2 -17   -0.03    3.32
   8   2 -17    5.45    2.93
  -8   2  17    4.08    2.59
  -8  -2  17   19.01    3.61
   8   2 -16    1.87    1.98
   8  -2 -16    7.32    2.95
   8   2 -16    6.06    2.50
  -8   2  16    5.31    2.68
  -8  -2  16    5.27    2.37
   8  -2 -15   10.34    2.68
   8   2 -15    6.59    1.91
   8   2 -15   10.29    2.74
  -8   2  15    6.75    2.80
  -8  -2  15   10.99    3.20
   8  -2 -14   11.07    2.68
   8   2 -14   11.87    2.15
   8   2 -14   11.08    2.41
  -8   2  14    6.41    2.23
  -8  -2  14   12.48    3.19
   8  -2 -13    3.05    1.89
   8   2 -13    3.81    1.56
   8   2 -13    3.68    2.08
  -8   2  13    3.79    1.99
  -8  -2  13    2.33    2.30
   8  -2 -12    5.17    2.30
   8   2 -12    5.90    1.53
   8   2 -12    4.60    1.98
  -8   2  12    2.61    0.76
  -8   2  12    5.78    1.59
  -8  -2  12    5.00    2.20
   8  -2 -11    4.60    2.02
   8   2 -11    8.97    1.80
   8   2 -11   13.71    2.41
  -8   2  11    7.87    1.16
  -8   2  11    6.59    1.69
  -8  -2  11   12.74    2.43
   8  -2 -10   39.35    3.56
   8   2 -10   40.37    3.08
   8   2 -10   38.75    3.80
  -8   2  10   43.65    2.15
  -8   2  10   38.87    3.36
  -8  -2  10   43.18    3.67
   8  -2  -9   49.23    3.81
   8   2  -9   54.40    3.91
   8   2  -9   49.78    3.06
  -8   2   9   52.97    2.44
  -8   2   9   47.80    3.44
  -8  -2   9   58.62    3.86
   8  -2  -8   58.61    3.82
   8   2  -8   60.33    3.48
   8   2  -8   62.26    3.93
  -8   2   8   56.79    2.59
  -8   2   8   59.95    3.50
  -8  -2   8   64.68    3.43
   8  -2  -7   43.73    3.18
   8   2  -7   49.10    3.04
   8   2  -7   44.09    3.23
  -8   2   7   47.23    2.79
  -8   2   7   47.76    2.34
  -8  -2   7   50.86    2.75
   8  -2  -6   14.23    2.14
   8   2  -6   11.70    1.75
  -8   2   6   10.42    1.16
  -8   2   6   13.93    1.41
  -8  -2   6   13.63    1.33
  -8  -2   6   10.89    1.58
   8  -2  -5    1.20    0.84
   8   2  -5   -0.44    0.89
  -8   2   5   -0.13    0.64
  -8  -2   5    0.59    0.46
  -8  -2   5    0.18    0.83
   8  -2  -4   15.46    1.81
   8   2  -4   19.37    1.90
  -8   2   4   17.65    1.57
  -8   2   4   19.35    1.36
  -8  -2   4   19.41    1.06
  -8  -2   4   19.36    1.86
   8  -2  -3   80.19    3.80
   8   2  -3   79.34    3.60
  -8  -2   3   78.27    3.85
  -8   2   3   78.69    2.75
  -8   2   3   75.65    3.30
  -8  -2   3   77.58    1.72
   8  -2  -2  200.05    6.67
   8   2  -2  197.34    6.51
  -8   2   2  196.77    6.35
  -8   2   2  196.98    5.01
  -8  -2   2  196.13    6.76
   8  -2  -1  238.80    7.30
   8   2  -1  241.66    7.55
  -8   2   1  237.04    5.67
  -8   2   1  240.45    7.34
  -8  -2   1  234.36    7.53
   8  -2   0  130.54    3.69
   8  -2   0  138.90    4.86
   8   2   0  134.29    4.93
  -8   2   0  129.17    4.98
  -8  -2   0  132.70    5.09
   8   2   1   38.14    2.32
   8  -2   1   37.40    1.85
   8  -2   1   43.10    2.35
   8   2   1   37.74    0.83
  -8   2  -1   39.08    2.42
  -8  -2  -1   40.31    2.45
   8  -2   2    6.65    1.04
   8  -2   2    7.38    1.17
   8   2   2   10.30    1.25
   8   2   2   10.25    0.57
  -8   2  -2    9.93    1.47
  -8  -2  -2   11.34    1.50
   8  -2   3   21.44    1.69
   8  -2   3   20.79    1.59
   8   2   3   20.48    1.93
   8   2   3   23.15    1.18
  -8   2  -3   21.65    1.86
  -8  -2  -3   18.89    1.91
   8  -2   4    3.20    1.13
   8  -2   4    2.33    0.72
   8   2   4    3.16    1.16
   8   2   4    3.46    0.65
  -8   2  -4    6.72    1.38
  -8  -2  -4    2.13    1.13
   8  -2   5   31.64    2.74
   8  -2   5   32.59    1.98
   8   2   5   34.96    2.63
   8   2   5   31.60    1.93
  -8   2  -5   30.49    2.71
  -8  -2  -5   34.36    2.68
   8   2   6   48.76    3.37
   8  -2   6   43.21    2.54
   8  -2   6   47.84    3.51
   8   2   6   46.10    2.82
  -8   2  -6   43.62    3.13
  -8  -2  -6   45.92    3.07
   8  -2   7    9.25    2.32
   8  -2   7   13.28    1.43
   8   2   7   15.55    1.86
   8   2   7   11.17    1.69
  -8   2  -7   12.08    1.85
  -8  -2  -7   11.92    1.90
   8  -2   8    1.88    1.99
   8  -2   8    6.29    1.27
   8   2   8    3.26    1.54
   8   2   8    4.07    1.60
  -8   2  -8    2.75    1.63
  -8  -2  -8    3.56    1.48
   8  -2   9    2.56    1.88
   8   2   9    2.31    1.36
   8   2   9   -0.84    1.44
  -8   2  -9    2.53    1.43
  -8  -2  -9    0.24    1.13
   8  -2  10   -1.03    1.85
   8  -2  10    0.12    0.83
   8   2  10    0.77    1.35
   8   2  10    1.11    1.39
  -8   2 -10    0.12    1.36
  -8  -2 -10    0.57    0.99
   8   2  11    3.47    1.48
   8  -2  11    4.33    2.54
   8   2  11    2.38    2.15
  -8   2 -11    2.35    1.98
  -8  -2 -11    2.60    1.48
   8  -2  12    0.63    2.04
   8   2  12    5.54    2.21
  -8   2 -12    2.79    1.92
  -8   2 -12    3.66    1.52
  -8  -2 -12    1.23    1.47
   8  -2  13    5.58    2.73
   8   2  13    4.14    2.53
  -8   2 -13    2.32    2.33
  -8   2 -13    4.42    1.61
  -8  -2 -13    3.91    1.57
  -8  -2 -13    0.86    2.18
   8  -2  14   -0.43    2.38
   8   2  14   -1.03    2.35
  -8   2 -14   -1.14    1.34
  -8  -2 -14   -0.73    1.48
  -8  -2 -14   -0.49    1.94
   8  -2  15    2.66    2.03
   8   2  15   -1.90    2.26
  -8   2 -15   -1.73    1.78
  -8  -2 -15   -0.14    1.95
   8  -2  16    0.70    3.23
   8   2  16    0.41    3.01
  -8   2 -16   -2.33    2.38
  -8  -2 -16    6.61    2.42
   8  -2  17    2.32    2.64
   8   2  17   -2.08    2.42
  -8  -2 -17   -0.02    2.05
   8  -4 -18    0.16    3.00
  -8  -4  18    1.05    3.06
  -8   4  18    1.72    2.66
   8   4 -17    9.63    3.02
   8  -4 -17    5.42    3.22
  -8  -4  17    9.40    3.87
  -8   4  17    8.95    3.44
   8   4 -16    2.32    1.91
   8   4 -16    1.66    1.77
   8  -4 -16   -2.84    2.48
  -8  -4  16    1.62    2.10
  -8   4  16   -1.50    2.15
   8   4 -15   22.34    3.25
   8  -4 -15   15.18    3.54
  -8  -4  15   10.64    4.04
  -8   4  15   23.41    3.77
   8   4 -14   -0.03    1.47
   8   4 -14   -0.91    1.36
   8  -4 -14    0.63    1.49
  -8   4  14    0.88    1.57
   8   4 -13   -1.15    1.70
   8   4 -13   -1.52    1.68
   8  -4 -13   -2.03    2.22
  -8  -4  13   -0.30    1.87
  -8   4  13   -1.10    1.87
   8   4 -12    4.14    1.69
   8   4 -12    0.08    1.78
   8  -4 -12    1.18    1.88
  -8  -4  12    4.61    1.96
  -8   4  12    0.44    1.77
   8   4 -11    0.87    1.82
   8   4 -11    0.74    1.55
   8  -4 -11    3.06    1.96
  -8  -4  11    3.26    1.97
  -8   4  11    7.04    1.78
   8   4 -10    5.17    1.97
   8   4 -10    3.43    1.66
   8  -4 -10    7.27    2.55
  -8  -4  10    4.97    2.02
  -8   4  10    6.31    1.85
   8   4  -9  101.61    5.24
   8   4  -9  117.37    6.34
   8  -4  -9  109.61    6.56
  -8  -4   9  116.94    6.08
  -8   4   9  102.91    5.56
  -8   4   9  101.98    3.45
   8   4  -8    4.96    1.64
   8   4  -8    2.36    1.39
   8  -4  -8    3.27    1.63
  -8  -4   8    4.75    1.67
  -8   4   8    2.58    1.18
  -8   4   8    3.97    0.73
   8   4  -7   48.10    3.25
   8   4  -7   41.93    2.92
   8  -4  -7   50.76    3.94
  -8  -4   7   44.12    2.92
  -8   4   7   41.55    2.04
  -8   4   7   46.14    3.18
   8   4  -6    3.35    1.03
   8   4  -6    0.22    1.09
   8  -4  -6    0.86    1.44
  -8  -4   6    1.35    0.86
  -8   4   6    1.25    0.63
  -8   4   6    0.95    0.88
   8   4  -5    2.46    1.14
   8   4  -5    2.31    1.10
   8  -4  -5    0.56    1.36
  -8  -4   5    1.36    0.69
  -8   4   5    2.84    1.01
  -8   4   5    1.83    0.81
   8   4  -4    2.29    1.07
   8   4  -4    2.65    1.01
   8  -4  -4    3.25    1.19
  -8  -4   4    2.11    0.62
  -8   4   4    0.13    0.96
  -8   4   4    3.98    0.91
   8   4  -3   89.30    4.18
   8  -4  -3   85.82    4.15
  -8  -4   3   85.42    2.59
  -8  -4   3   83.66    4.40
  -8   4   3   89.56    3.83
  -8   4   3   88.69    3.84
   8   4  -2    0.19    0.94
   8  -4  -2    4.57    1.12
  -8  -4   2    0.46    0.40
  -8  -4   2    2.17    0.92
  -8   4   2    3.87    0.95
  -8   4   2    2.01    0.78
   8   4  -1  364.58   10.96
   8  -4  -1  352.53    9.97
  -8  -4   1  357.09    5.87
  -8  -4   1  357.36   11.01
  -8   4   1  363.65   10.55
  -8   4   1  353.95    9.77
   8   4   0   10.38    1.49
   8  -4   0   10.04    1.38
  -8  -4   0   10.01    1.64
  -8   4   0   12.79    1.72
   8   4   1   34.87    1.30
   8   4   1   38.07    2.48
   8  -4   1   36.01    2.00
   8  -4   1   30.84    2.25
  -8  -4  -1   36.96    2.45
  -8   4  -1   39.90    2.75
   8   4   2    4.69    1.06
   8   4   2    2.51    0.51
   8  -4   2    2.88    0.85
   8  -4   2    4.27    1.15
  -8  -4  -2    1.79    1.22
  -8   4  -2    3.39    1.11
   8   4   3   14.96    1.92
   8   4   3   12.80    0.94
   8  -4   3   15.79    1.82
   8  -4   3   12.56    1.13
  -8  -4  -3   14.58    1.84
  -8   4  -3   12.05    1.92
   8   4   4    2.31    1.17
   8   4   4    1.00    0.59
   8  -4   4    0.79    0.65
  -8  -4  -4    3.05    1.16
  -8   4  -4    3.82    1.29
   8   4   5   60.36    3.81
   8   4   5   60.01    2.80
   8  -4   5   71.18    4.36
   8  -4   5   61.57    2.60
  -8  -4  -5   66.32    3.77
  -8   4  -5   58.71    3.89
   8   4   6    1.69    1.11
   8   4   6    1.03    0.79
   8  -4   6    0.83    0.58
   8  -4   6   -1.02    1.55
  -8  -4  -6   -1.16    1.07
  -8   4  -6    3.02    1.11
   8   4   7   10.73    2.32
   8   4   7   11.09    1.57
   8  -4   7   15.78    2.45
   8  -4   7   12.68    1.22
  -8  -4  -7   14.14    1.99
  -8   4  -7   15.35    2.49
   8   4   8    3.47    1.52
   8   4   8    1.46    1.28
   8  -4   8   -1.18    2.00
   8  -4   8    2.06    0.78
  -8  -4  -8   -0.86    1.09
  -8   4  -8    1.25    1.32
   8   4   9    2.66    1.70
   8   4   9    3.00    1.47
   8  -4   9   -1.12    1.65
   8  -4   9    2.03    0.71
  -8  -4  -9    3.11    1.24
  -8   4  -9   -0.98    1.72
   8   4  10    5.02    1.63
   8   4  10    0.99    1.74
   8  -4  10    4.60    2.37
  -8  -4 -10    2.59    1.23
  -8   4 -10    3.95    1.99
   8   4  11    7.56    2.51
   8   4  11    7.92    2.50
   8  -4  11    5.71    3.01
  -8  -4 -11    9.53    1.60
  -8   4 -11    8.72    2.27
   8   4  12   -0.72    1.89
   8  -4  12    0.37    1.97
  -8  -4 -12    0.92    2.01
  -8  -4 -12    0.66    1.30
  -8   4 -12    7.05    2.13
   8   4  13    2.38    2.45
   8  -4  13    4.32    3.25
  -8  -4 -13    0.18    2.40
  -8   4 -13    8.22    2.69
   8   4  14   -0.50    2.02
  -8   4 -14    0.10    1.97
   8   4  15   -1.44    2.41
   8  -4  15    4.01    3.22
  -8  -4 -15    6.87    2.77
  -8   4 -15    0.81    2.71
   8   4  16   -0.75    3.20
   8  -4  16    7.65    3.38
  -8  -4 -16    0.71    2.88
  -8   4 -16    1.79    2.81
   8   6 -17    1.75    2.77
   8  -6 -17    8.61    4.17
  -8   6  17    8.33    2.85
  -8  -6  17    7.86    3.81
   8   6 -16    7.17    3.23
   8  -6 -16    6.29    3.22
  -8  -6  16    9.21    3.69
  -8   6  16    7.30    3.38
   8   6 -15    5.53    3.15
   8  -6 -15    8.16    3.75
  -8  -6  15    7.94    3.54
  -8   6  15    9.50    2.83
   8   6 -14    3.91    2.74
   8  -6 -14    5.51    3.31
  -8  -6  14   10.07    3.08
  -8   6  14    6.66    2.35
   8   6 -13    0.11    1.25
   8   6 -13   -1.90    1.80
   8  -6 -13    2.76    1.94
  -8  -6  13    1.05    2.21
  -8   6  13    2.87    1.94
   8   6 -12    2.88    2.00
   8   6 -12    0.17    1.47
   8  -6 -12   -0.35    2.16
  -8  -6  12    9.98    2.38
  -8   6  12    2.52    2.12
   8   6 -11    0.46    1.26
   8   6 -11    0.99    2.03
   8  -6 -11    3.52    2.46
  -8  -6  11    9.93    2.21
  -8   6  11    4.54    2.00
   8   6 -10    4.38    1.60
   8   6 -10    5.96    2.24
   8  -6 -10    8.32    2.81
  -8  -6  10    7.42    2.30
  -8   6  10    6.84    2.30
   8   6  -9   93.38    5.91
   8   6  -9   95.74    4.95
   8  -6  -9  110.80    7.26
  -8  -6   9   93.85    5.55
  -8   6   9   90.84    5.62
   8   6  -8   62.05    3.77
   8   6  -8   64.02    4.78
   8  -6  -8   68.63    5.53
  -8  -6   8   65.74    4.18
  -8   6   8   54.50    4.08
   8   6  -7   14.85    1.93
   8   6  -7   14.76    2.78
   8  -6  -7   17.45    3.07
  -8  -6   7   14.88    2.08
  -8   6   7   15.27    1.23
  -8   6   7   15.97    2.41
   8   6  -6    4.34    1.69
   8   6  -6    4.04    1.21
   8  -6  -6    6.60    2.00
  -8  -6   6    5.05    1.44
  -8   6   6    3.36    1.67
  -8   6   6    4.98    0.90
   8   6  -5   -0.50    0.99
   8   6  -5    4.22    1.42
   8  -6  -5    1.87    1.52
  -8  -6   5    1.00    0.89
  -8   6   5    0.21    0.68
  -8   6   5    0.41    0.94
   8   6  -4    5.34    1.49
   8   6  -4    4.35    1.38
   8  -6  -4    6.49    1.72
  -8  -6   4    4.40    0.96
  -8   6   4    2.76    1.41
  -8   6   4    3.66    1.14
   8   6  -3   47.59    3.09
   8   6  -3   51.76    3.81
   8  -6  -3   57.49    4.01
  -8  -6   3   51.65    2.54
  -8   6   3   53.83    3.09
  -8   6   3   57.40    3.30
   8   6  -2   76.56    4.77
   8   6  -2   81.87    4.31
   8  -6  -2   83.43    4.54
  -8  -6   2   83.54    3.14
  -8   6   2   77.85    4.27
  -8   6   2   91.33    4.36
   8   6  -1  156.52    6.41
   8  -6  -1  150.41    5.86
  -8  -6   1  148.19    4.53
  -8  -6   1  146.83    6.62
  -8   6   1  156.74    6.73
  -8   6   1  158.85    6.49
   8   6   0   74.57    2.91
   8   6   0   76.70    4.41
   8  -6   0   79.36    3.66
  -8  -6   0   70.85    4.33
  -8   6   0   75.89    4.31
  -8   6   0   67.03    3.86
   8   6   1   20.57    2.36
   8   6   1   18.65    1.32
   8  -6   1   18.47    1.65
   8  -6   1   19.61    2.02
  -8  -6  -1   20.17    2.11
  -8   6  -1   18.25    2.44
   8   6   2    0.39    0.48
   8   6   2   -0.06    1.04
   8  -6   2    0.15    1.09
   8  -6   2    0.45    0.50
  -8  -6  -2   -1.17    1.04
  -8   6  -2    0.41    1.13
   8   6   3    3.04    0.82
   8   6   3    5.59    1.35
   8  -6   3    4.54    1.76
   8  -6   3    3.77    0.69
  -8  -6  -3    3.85    1.55
  -8   6  -3    3.70    1.46
   8   6   4    1.16    0.73
   8   6   4    3.55    1.39
   8  -6   4    0.12    0.54
   8  -6   4   -0.18    1.19
  -8  -6  -4    3.35    1.20
  -8   6  -4    1.70    1.42
   8   6   5   47.88    2.77
   8   6   5   45.90    3.90
   8  -6   5   39.67    1.80
   8  -6   5   46.20    3.77
  -8  -6  -5   51.40    3.45
  -8   6  -5   43.96    3.76
   8   6   6   12.04    2.09
   8   6   6   10.50    1.78
   8  -6   6   12.85    2.29
  -8  -6  -6   13.97    1.97
  -8   6  -6   15.60    2.57
   8   6   7   13.48    1.98
   8   6   7   12.80    2.02
   8  -6   7   14.11    2.93
  -8  -6  -7   14.18    1.94
  -8   6  -7   11.32    2.38
   8   6   8    5.35    1.68
   8   6   8    4.76    1.62
   8  -6   8    7.19    2.49
  -8  -6  -8    2.80    1.43
  -8   6  -8    8.08    2.34
   8   6   9    1.04    1.35
   8   6   9    1.82    1.41
   8  -6   9    2.13    2.02
  -8  -6  -9   -0.49    0.97
  -8   6  -9    2.48    1.87
   8   6  10    1.37    1.48
   8   6  10    5.02    1.76
   8  -6  10   -0.18    2.14
  -8  -6 -10   -0.64    1.05
  -8   6 -10   -1.19    1.74
   8   6  11    6.14    2.47
   8  -6  11   10.10    3.58
  -8   6 -11   10.26    3.00
   8   6  12    2.24    2.21
   8  -6  12    1.62    2.23
  -8  -6 -12   -1.49    2.50
  -8   6 -12    5.44    2.52
   8   6  13    3.46    2.38
   8  -6  13    9.05    3.23
  -8  -6 -13   -0.35    2.09
  -8   6 -13    0.69    2.50
   8   6  14    0.42    2.57
  -8  -6 -14    3.83    2.68
  -8   6 -14    0.56    2.60
   8   6  15    3.54    3.18
   8  -6  15   -3.14    3.19
  -8  -6 -15    5.87    2.46
  -8   6 -15    1.53    2.95
   8   8 -16   12.88    3.95
   8  -8 -16    8.01    3.77
  -8  -8  16   13.36    4.29
  -8   8  16    2.02    3.99
   8  -8 -15    1.68    3.03
   8   8 -15   -0.40    2.03
  -8  -8  15   -0.31    2.92
  -8   8  15    2.30    2.57
   8   8 -14    7.17    3.56
   8  -8 -14   13.50    4.35
  -8  -8  14   12.29    4.08
  -8   8  14   14.57    3.82
   8   8 -13    2.12    2.25
   8  -8 -13   -0.58    2.20
  -8  -8  13    0.21    2.41
  -8   8  13    1.86    1.94
   8   8 -12    5.18    2.44
   8  -8 -12    0.57    2.26
  -8  -8  12    1.43    2.52
  -8   8  12    2.44    2.51
   8   8 -11    0.85    1.80
   8  -8 -11    0.56    2.11
  -8   8  11   -0.58    1.80
   8   8 -10   14.86    2.27
   8   8 -10   16.68    3.03
   8  -8 -10   18.88    3.97
  -8  -8  10   17.05    3.42
  -8   8  10   23.62    3.38
   8   8  -9    0.00    0.87
   8   8  -9   -0.18    1.22
   8  -8  -9    0.01    1.43
  -8   8   9    0.98    1.47
   8   8  -8   27.55    2.50
   8   8  -8   28.47    3.93
   8  -8  -8   33.81    3.83
  -8  -8   8   30.13    3.45
  -8   8   8   25.51    3.62
   8   8  -7   -0.21    0.92
   8   8  -7   -0.57    1.74
   8  -8  -7   -2.00    1.75
  -8  -8   7   -0.14    1.18
  -8   8   7   -0.26    1.43
   8   8  -6    4.86    1.85
   8   8  -6    5.31    1.43
   8  -8  -6    6.69    2.35
  -8  -8   6    2.32    1.63
  -8   8   6    3.88    1.56
  -8   8   6    2.63    0.93
   8   8  -5    5.05    1.96
   8   8  -5    3.34    1.25
   8  -8  -5   -1.67    1.79
  -8  -8   5    4.42    1.39
  -8   8   5   -0.19    1.06
  -8   8   5    0.97    1.62
   8   8  -4    5.72    2.05
   8   8  -4    1.01    1.38
   8  -8  -4    6.07    1.93
  -8  -8   4    2.90    1.41
  -8   8   4    5.02    1.23
  -8   8   4    7.24    1.83
   8   8  -3   -0.56    1.04
   8   8  -3   -0.14    1.24
  -8  -8   3   -0.37    0.83
  -8   8   3   -0.76    0.99
  -8   8   3    0.20    1.06
   8   8  -2    3.75    1.46
   8   8  -2    5.60    1.88
   8  -8  -2    4.60    1.73
  -8  -8   2    2.84    1.25
  -8   8   2    4.35    1.54
  -8   8   2    4.75    1.70
   8   8  -1    3.73    1.53
   8   8  -1    1.10    1.27
   8  -8  -1    0.98    1.20
  -8  -8   1    0.31    0.88
  -8   8   1    1.51    1.42
  -8   8   1    0.53    1.29
   8   8   0   27.44    2.94
   8  -8   0   29.09    2.25
   8  -8   0   29.00    2.95
  -8  -8   0   30.88    3.22
  -8   8   0   29.46    3.11
   8   8   1    1.90    0.97
   8   8   1    0.46    1.36
   8  -8   1   -0.29    0.75
   8  -8   1    1.16    1.30
  -8  -8  -1    1.83    1.49
  -8   8  -1    3.27    1.22
   8   8   2    2.73    1.71
   8   8   2    2.73    0.99
   8  -8   2    7.98    1.93
   8  -8   2    1.60    0.83
  -8  -8  -2    1.62    1.62
  -8   8  -2    2.12    1.78
   8   8   3    5.21    1.64
   8   8   3    4.05    1.18
   8  -8   3    6.52    2.17
  -8  -8  -3    4.46    1.85
  -8   8  -3    3.41    1.73
   8   8   4    2.02    1.23
   8   8   4   -0.26    1.07
   8  -8   4    1.74    1.37
  -8  -8  -4    0.53    1.33
  -8   8  -4    1.44    1.37
   8   8   5    0.43    1.63
   8   8   5    1.00    1.18
   8  -8   5    1.19    1.91
  -8  -8  -5    1.77    1.16
  -8   8  -5    1.72    1.89
   8   8   6   25.96    3.15
   8   8   6   22.06    2.60
   8  -8   6   23.92    3.25
  -8  -8  -6   26.50    2.83
  -8   8  -6   25.64    3.47
   8   8   7    1.70    2.03
   8   8   7    1.34    1.49
   8  -8   7    2.42    1.84
  -8  -8  -7    0.99    1.33
  -8   8  -7    3.89    1.76
   8   8   8    4.04    1.97
   8   8   8    6.78    1.92
   8  -8   8    9.15    2.53
  -8  -8  -8    3.65    1.45
  -8   8  -8    5.70    2.16
   8   8   9   -0.89    1.93
   8   8   9   -0.26    1.75
   8  -8   9    1.26    2.58
  -8   8  -9    5.94    2.13
   8   8  10   -0.40    1.73
   8  -8  10   -0.98    2.54
  -8  -8 -10   -1.05    1.64
   8   8  11   -0.09    2.36
   8  -8  11    0.22    2.65
  -8  -8 -11    8.61    2.70
   8   8  12   -0.13    2.79
   8  -8  12   12.13    3.92
  -8  -8 -12    4.48    2.52
  -8   8 -12    4.55    2.61
   8   8  13    1.68    2.89
   8  -8  13    7.53    3.76
  -8  -8 -13    1.16    2.90
  -8   8 -13    3.77    3.28
   8 -10 -14    4.86    4.26
   8  10 -14    5.63    3.14
  -8  10  14   14.05    3.81
  -8 -10  14    0.38    3.95
   8  10 -13    1.87    2.53
   8 -10 -13    1.68    3.54
  -8 -10  13    4.90    3.05
  -8  10  13    1.75    2.97
   8 -10 -12    3.85    3.46
  -8 -10  12    3.70    3.01
  -8  10  12    1.75    2.94
   8 -10 -11    2.28    2.69
   8  10 -11   -1.42    1.80
  -8  10  11   -0.89    1.80
   8 -10 -10   20.09    4.53
   8  10 -10   16.23    3.99
  -8  10  10   14.06    3.20
  -8 -10  10   17.72    3.87
   8 -10  -9    9.18    3.94
   8  10  -9   13.72    3.00
  -8  10   9   10.36    3.33
  -8 -10   9   12.16    3.23
   8 -10  -8   33.66    4.16
   8  10  -8   28.22    3.93
  -8  10   8   30.07    4.21
  -8 -10   8   26.23    4.08
   8 -10  -7   17.70    3.70
   8  10  -7   14.72    3.11
  -8  10   7   11.78    3.36
  -8 -10   7   22.64    3.21
   8  10  -6    7.61    1.93
   8  10  -6    9.91    2.75
   8 -10  -6   10.02    3.25
  -8  10   6   14.91    2.89
  -8 -10   6   16.23    2.60
   8  10  -5    2.20    2.40
   8  10  -5    3.17    1.52
   8 -10  -5    7.73    2.30
  -8 -10   5    1.22    1.74
  -8  10   5    0.10    2.04
  -8  10   5    3.53    1.48
   8  10  -4   12.30    2.02
   8  10  -4    9.05    3.12
   8 -10  -4   12.45    2.67
  -8 -10   4    9.03    2.20
  -8  10   4   13.71    2.45
  -8  10   4   10.83    1.98
   8  10  -3   24.47    2.81
   8  10  -3   20.35    3.61
   8 -10  -3   20.16    2.59
  -8 -10   3   19.37    2.79
  -8  10   3   19.97    3.49
  -8  10   3   24.16    2.96
   8  10  -2   47.42    4.02
   8  10  -2   49.19    4.98
   8 -10  -2   50.51    4.07
  -8 -10   2   49.73    4.00
  -8  10   2   54.07    4.94
  -8  10   2   52.10    4.48
   8  10  -1   35.57    3.72
   8  10  -1   43.38    3.90
   8 -10  -1   35.78    3.09
  -8 -10   1   42.32    3.44
  -8  10   1   36.30    3.99
  -8  10   1   34.34    3.77
   8  10   0   47.30    3.91
   8 -10   0   43.65    4.65
  -8 -10   0   44.47    3.65
  -8  10   0   50.62    4.53
   8  10   1    8.35    2.24
   8  10   1    5.22    1.65
   8 -10   1    6.17    2.59
  -8 -10  -1   11.43    2.42
  -8  10  -1    5.58    2.05
   8  10   2    0.25    0.96
   8  10   2    1.93    1.22
   8 -10   2   -1.46    1.37
  -8 -10  -2   -1.64    1.21
  -8  10  -2    0.38    1.02
   8  10   3    5.33    2.32
   8  10   3    4.18    1.78
   8 -10   3    8.35    2.56
  -8 -10  -3    4.11    2.05
  -8  10  -3    2.66    1.99
   8  10   4    4.80    1.97
   8  10   4    6.43    2.54
   8 -10   4    8.04    2.95
  -8 -10  -4    6.89    2.30
  -8  10  -4   13.37    2.98
   8  10   5   17.24    3.42
   8  10   5   16.09    2.42
   8 -10   5   14.42    3.72
  -8 -10  -5   18.16    2.60
  -8  10  -5   10.80    2.94
   8  10   6   11.42    2.58
   8  10   6   16.75    3.15
   8 -10   6    7.39    2.86
  -8 -10  -6    7.98    2.42
  -8  10  -6    9.94    3.37
   8  10   7    2.12    2.18
   8  10   7    1.54    1.74
   8 -10   7    1.54    2.03
  -8  10  -7   -0.52    2.61
   8  10   8    7.83    2.51
   8 -10   8    7.47    3.47
  -8  10  -8    5.12    2.86
   8  10   9   -1.30    1.57
   8 -10   9   -1.07    1.90
  -8 -10  -9    0.27    1.60
  -8  10  -9    1.77    1.75
   8 -10  10   -1.21    3.40
  -8 -10 -10    4.94    2.44
  -8  10 -10    3.43    2.51
   8 -10  11    1.97    3.12
  -8 -10 -11    0.64    2.11
  -8  10 -11   -0.17    2.63
   8  12 -10    2.79    2.55
  -8 -12  10    4.81    3.07
  -8  12  10   -0.04    2.27
   8  12  -9   23.91    5.18
   8 -12  -9   21.40    5.26
  -8 -12   9   19.78    4.64
  -8  12   9   21.54    4.03
   8  12  -8   -0.54    3.17
  -8 -12   8    1.30    2.78
  -8  12   8    6.79    2.93
   8 -12  -7   11.26    3.98
   8  12  -7   12.58    3.70
  -8 -12   7   15.61    3.62
  -8  12   7   14.09    3.72
   8  12  -6   -0.79    3.19
   8 -12  -6    3.73    2.70
  -8  12   6    6.91    2.86
   8  12  -5    6.24    3.36
   8 -12  -5    3.20    2.38
  -8 -12   5    8.02    2.56
  -8  12   5    1.88    2.39
   8  12  -4   -1.74    1.73
   8 -12  -4    4.39    1.71
  -8 -12   4    0.64    1.76
  -8  12   4   -2.05    1.64
   8  12  -3   25.46    3.89
  -8 -12   3   25.22    3.59
  -8  12   3   22.13    3.68
  -8  12   3   19.06    3.43
   8  12  -2    1.71    2.24
   8  12  -2    5.38    2.17
  -8 -12   2    9.94    2.48
  -8  12   2    5.85    2.28
  -8  12   2    0.97    2.09
   8  12  -1   28.76    4.61
   8  12  -1   31.37    4.01
   8 -12  -1   28.38    4.70
  -8 -12   1   35.02    3.79
  -8  12   1   34.87    4.37
   8  12   0    1.58    1.39
   8  12   0    1.29    2.00
   8 -12   0    1.20    1.96
  -8 -12   0    0.57    1.99
  -8  12   0    6.24    2.40
   8  12   1   12.90    2.82
   8 -12   1    7.42    3.13
  -8 -12  -1    6.15    2.85
  -8 -12  -1    7.70    2.63
  -8  12  -1    5.21    2.41
   8  12   2   -0.68    1.51
   8  12   2    0.74    1.65
   8 -12   2   -0.33    1.85
  -8 -12  -2    9.65    2.14
  -8  12  -2   -1.89    2.24
   8  12   3    0.45    1.90
   8  12   3    2.25    1.53
   8 -12   3    0.22    2.35
  -8 -12  -3   -0.95    1.82
  -8  12  -3   -0.37    2.30
   8  12   4    1.57    1.90
   8 -12   4    0.48    1.93
   8  12   4    1.93    1.75
  -8 -12  -4   -1.22    1.60
  -8  12  -4    0.15    2.31
   8  12   5   12.15    2.77
   8 -12   5   11.81    3.79
  -8  12  -5    8.74    3.93
   8 -12   6    5.48    2.81
  -8 -12  -6   -1.40    2.51
  -8  12  -6   -0.09    2.62
   8 -12   7    4.18    2.85
  -8 -12  -7    3.22    3.08
  -8  12  -7    4.75    3.47
   8 -12   8   -1.18    3.27
  -8 -12  -8   -0.42    2.89
  -8  12  -8    6.65    3.11
   9  -1 -19    3.81    2.96
   9   1 -19   -2.11    2.66
  -9   1  19   -1.54    2.75
  -9  -1  19    3.03    2.34
   9  -1 -18    7.14    3.43
   9   1 -18    7.55    3.41
  -9   1  18    5.06    2.70
  -9  -1  18    7.25    2.98
   9  -1 -17   10.94    2.60
   9   1 -17   -0.02    2.56
  -9   1  17   -2.34    2.52
  -9  -1  17    0.24    2.18
   9  -1 -16   14.53    3.18
   9   1 -16   17.78    3.75
  -9   1  16   15.67    3.00
  -9  -1  16   12.22    3.72
   9  -1 -15    6.07    2.41
   9   1 -15    6.83    2.36
  -9   1  15    6.37    2.12
  -9  -1  15    6.59    1.86
  -9  -1  15    5.40    2.65
   9  -1 -14   -1.71    1.71
   9   1 -14   -1.98    1.67
  -9   1  14    0.36    1.36
  -9  -1  14    1.49    1.66
   9  -1 -13   11.54    2.62
   9   1 -13    5.80    2.57
  -9   1  13    6.59    1.20
  -9   1  13    7.89    2.26
  -9  -1  13    7.11    1.70
  -9  -1  13    6.86    2.32
   9  -1 -12   22.51    3.58
   9   1 -12   20.38    3.25
  -9   1  12   17.98    1.86
  -9   1  12   16.14    2.70
  -9  -1  12   18.61    2.26
  -9  -1  12   21.01    2.81
   9  -1 -11    9.99    2.36
   9   1 -11    8.74    2.51
  -9   1  11    9.65    2.17
  -9   1  11   11.32    1.39
  -9  -1  11    9.75    1.84
  -9  -1  11   12.21    2.30
   9  -1 -10   84.93    5.94
   9   1 -10   83.80    5.53
  -9   1  10   80.64    3.69
  -9   1  10   81.42    4.61
  -9  -1  10   83.24    4.26
  -9  -1  10   86.29    4.72
   9  -1  -9    4.61    1.90
   9   1  -9    4.71    1.97
  -9   1   9    4.87    1.05
  -9   1   9    4.60    1.39
  -9  -1   9    5.57    1.40
  -9  -1   9    5.53    1.39
   9  -1  -8   66.62    4.17
   9   1  -8   61.54    4.17
  -9   1   8   55.40    2.99
  -9   1   8   55.30    3.14
  -9  -1   8   56.54    3.41
  -9  -1   8   60.02    3.14
   9  -1  -7    0.32    1.45
   9   1  -7    1.42    1.33
  -9   1   7   -0.67    0.76
  -9   1   7    1.91    0.71
  -9  -1   7    2.81    1.06
  -9  -1   7    0.68    0.76
   9  -1  -6    6.55    1.78
   9   1  -6    8.10    1.59
  -9   1   6    7.94    1.30
  -9   1   6    7.84    0.95
  -9  -1   6    8.63    1.52
  -9  -1   6    7.08    0.96
   9  -1  -5    2.92    1.20
   9   1  -5    2.65    1.00
  -9   1   5    3.45    1.07
  -9   1   5    1.90    0.61
  -9  -1   5    2.50    1.13
  -9  -1   5    2.63    0.50
   9  -1  -4  123.86    5.57
   9   1  -4  118.66    5.36
  -9   1   4  128.54    4.98
  -9   1   4  127.65    3.71
  -9  -1   4  124.51    5.19
  -9  -1   4  130.96    3.01
   9  -1  -3   46.05    2.75
   9   1  -3   41.18    2.78
  -9   1   3   42.15    2.45
  -9   1   3   41.83    1.59
  -9  -1   3   44.18    2.74
  -9  -1   3   41.50    1.05
   9  -1  -2  130.23    5.33
   9   1  -2  135.67    5.31
  -9   1   2  127.37    5.06
  -9   1   2  130.82    3.17
  -9  -1   2  128.39    5.37
   9  -1  -1   28.80    2.20
   9  -1  -1   25.42    1.07
   9   1  -1   28.91    2.23
  -9   1   1   26.47    2.14
  -9  -1   1   28.99    2.30
   9  -1   0   92.93    4.17
   9  -1   0   92.07    2.61
   9   1   0   98.28    4.32
  -9   1   0   93.97    4.46
  -9  -1   0   83.98    4.10
   9  -1   1    4.12    1.13
   9  -1   1    5.61    0.70
   9   1   1    4.61    0.32
   9   1   1    6.88    1.07
  -9   1  -1    4.01    1.13
  -9  -1  -1    6.46    1.20
   9  -1   2    2.82    1.05
   9  -1   2    3.90    0.71
   9   1   2    2.77    0.50
   9   1   2    5.92    0.99
  -9   1  -2    2.96    1.10
  -9  -1  -2    6.47    1.28
   9  -1   3    3.98    0.83
   9  -1   3    3.51    1.07
   9   1   3    1.65    0.71
   9   1   3    3.37    1.23
  -9   1  -3    4.88    1.16
  -9  -1  -3    4.73    1.28
   9  -1   4  150.29    5.32
   9  -1   4  154.68    5.94
   9   1   4  158.88    5.07
   9   1   4  162.69    6.55
  -9   1  -4  151.76    6.54
  -9  -1  -4  169.51    6.64
   9  -1   5   16.01    1.97
   9  -1   5   18.84    1.86
   9   1   5   16.21    1.65
   9   1   5   17.41    1.85
  -9   1  -5   19.58    2.34
  -9  -1  -5   19.88    2.23
   9  -1   6    9.16    1.68
   9  -1   6    7.12    1.45
   9   1   6    4.91    1.61
   9   1   6    8.38    1.70
  -9   1  -6    9.68    1.62
  -9  -1  -6    7.68    1.51
   9  -1   7    0.28    1.41
   9  -1   7   -0.16    0.90
   9   1   7   -0.39    1.16
   9   1   7    0.85    1.11
  -9   1  -7    0.49    1.14
  -9  -1  -7    0.95    1.08
   9  -1   8    1.02    1.21
   9  -1   8    5.80    1.97
   9   1   8    2.20    1.73
   9   1   8    4.09    1.23
  -9   1  -8   -0.20    1.33
  -9  -1  -8    2.11    1.46
   9  -1   9    4.30    2.06
   9  -1   9    3.71    1.40
   9   1   9    7.15    2.09
   9   1   9    5.10    1.62
  -9   1  -9    3.99    1.84
  -9  -1  -9    3.60    1.67
   9  -1  10   16.90    3.02
   9  -1  10   12.69    2.00
   9   1  10   15.95    3.09
   9   1  10   12.47    2.52
  -9   1 -10   14.12    2.61
  -9  -1 -10   15.39    2.44
   9  -1  11   -0.18    2.15
   9  -1  11    3.24    1.51
   9   1  11    6.03    2.43
   9   1  11    2.28    1.70
  -9   1 -11    3.07    1.75
  -9  -1 -11    0.94    1.66
   9  -1  12   11.76    2.75
   9   1  12   18.72    3.91
   9   1  12   16.96    2.92
  -9   1 -12   17.39    2.91
  -9  -1 -12   11.99    2.76
   9   1  13    1.08    2.42
  -9   1 -13    4.82    2.09
  -9   1 -13    0.72    1.84
  -9  -1 -13    0.12    1.99
  -9  -1 -13    2.16    1.69
   9  -1  14   -0.14    2.42
   9   1  14   -0.50    2.31
  -9   1 -14    1.25    1.72
  -9   1 -14    0.29    1.84
  -9  -1 -14    1.32    1.65
  -9  -1 -14    0.25    1.91
   9  -1  15    8.60    2.58
   9   1  15   -2.40    2.85
  -9   1 -15    0.34    2.39
  -9  -1 -15    1.33    2.40
   9  -1  16   -0.19    3.02
   9   1  16    7.88    3.33
  -9  -1 -16    5.55    2.89
   9  -3 -19    1.11    3.20
  -9  -3  19   -1.48    2.62
  -9   3  19    6.86    2.98
   9   3 -18   -0.25    2.90
   9  -3 -18    9.00    3.33
  -9   3  18    0.85    2.51
  -9  -3  18    7.82    3.30
   9   3 -17    8.59    3.27
   9  -3 -17    7.73    3.89
   9   3 -17    5.32    2.42
  -9   3  17    8.07    3.02
  -9  -3  17   12.05    3.56
   9   3 -16    1.94    2.04
   9   3 -16   -0.75    2.40
   9  -3 -16    2.58    2.91
  -9   3  16    4.49    2.16
  -9  -3  16    7.85    2.95
   9   3 -15    3.77    2.06
   9   3 -15    9.00    2.58
   9  -3 -15   10.87    2.71
  -9   3  15    3.10    2.79
  -9  -3  15    7.27    3.12
   9   3 -14    0.66    1.62
   9  -3 -14    0.96    1.63
   9   3 -14    1.29    1.44
  -9  -3  14    0.42    1.57
  -9   3  14   -1.15    1.34
   9   3 -13    2.78    1.83
   9   3 -13    1.05    1.55
   9  -3 -13    1.24    1.69
  -9   3  13    0.71    1.76
  -9  -3  13    0.65    1.90
   9   3 -12   11.22    2.59
   9  -3 -12   10.06    3.03
   9   3 -12   10.38    2.30
  -9  -3  12   14.44    2.79
  -9   3  12   11.31    2.57
   9  -3 -11   13.66    2.98
   9   3 -11   18.26    2.65
   9   3 -11   12.05    2.28
  -9   3  11   10.90    1.14
  -9  -3  11   15.32    2.54
  -9   3  11   15.39    2.60
   9   3 -10    4.49    1.62
   9   3 -10    4.60    1.78
   9  -3 -10    4.60    1.77
  -9   3  10    6.19    1.70
  -9  -3  10    5.11    1.87
  -9   3  10    2.84    0.80
   9  -3  -9  109.27    6.71
   9   3  -9  129.44    6.53
   9   3  -9  118.63    5.98
  -9   3   9  120.52    4.23
  -9  -3   9  124.66    5.81
  -9   3   9  125.52    6.00
   9   3  -8   11.79    2.13
   9   3  -8   14.88    2.03
   9  -3  -8   13.04    2.16
  -9  -3   8   12.01    1.75
  -9   3   8   10.58    1.20
  -9   3   8   13.18    1.66
   9  -3  -7    2.34    1.51
   9   3  -7    3.24    1.14
   9   3  -7    1.08    1.16
  -9   3   7    3.60    0.83
  -9   3   7    3.18    0.96
  -9  -3   7    3.43    1.05
   9   3  -6    0.57    1.12
  -9   3   6    0.47    0.89
  -9   3   6    1.35    0.79
  -9  -3   6    1.47    0.63
  -9  -3   6   -0.20    1.09
   9  -3  -5    7.25    1.98
   9   3  -5   10.72    1.65
  -9   3   5   10.80    1.33
  -9   3   5    9.31    1.35
  -9  -3   5    8.14    0.86
  -9  -3   5    8.85    1.45
   9  -3  -4    4.18    1.45
   9   3  -4    4.10    1.26
  -9   3   4    1.93    0.74
  -9   3   4    4.19    1.00
  -9  -3   4    1.60    0.52
  -9  -3   4    1.28    0.96
   9   3  -3   21.97    1.86
   9  -3  -3   21.55    2.29
  -9   3   3   18.80    1.52
  -9   3   3   19.39    1.78
  -9  -3   3   18.51    0.75
  -9  -3   3   23.16    2.06
   9   3  -2   -0.40    0.75
   9  -3  -2    0.08    0.79
  -9   3   2    0.79    0.84
  -9   3   2    1.49    0.62
  -9  -3   2   -0.30    1.01
   9   3  -1   47.24    2.79
   9  -3  -1   48.32    2.71
  -9   3   1   45.57    2.31
  -9   3   1   40.61    2.65
  -9  -3   1   47.68    2.95
   9  -3   0   35.50    2.37
   9  -3   0   35.33    1.98
   9   3   0   31.57    2.58
  -9   3   0   31.59    2.49
  -9  -3   0   28.44    2.30
   9  -3   1    7.22    1.26
   9  -3   1    7.72    1.11
   9   3   1    6.61    0.35
   9   3   1    7.27    1.44
  -9  -3  -1   10.19    1.62
  -9   3  -1    6.47    1.50
   9  -3   2    0.37    0.67
   9  -3   2   -0.62    0.67
   9   3   2   -0.95    0.90
   9   3   2    0.16    0.25
  -9   3  -2    1.52    0.96
  -9  -3  -2    1.96    0.96
   9   3   3   -0.69    0.82
   9  -3   3    0.98    0.92
   9  -3   3    0.22    0.77
   9   3   3    1.18    0.40
  -9   3  -3    0.17    0.84
  -9  -3  -3   -0.14    1.05
   9  -3   4    7.67    1.09
   9  -3   4    8.09    1.62
   9   3   4    6.67    1.47
   9   3   4    6.32    0.81
  -9   3  -4   10.08    1.54
  -9  -3  -4    8.31    1.71
   9   3   5   47.12    3.53
   9  -3   5   47.47    2.69
   9  -3   5   51.00    3.58
   9   3   5   44.86    2.34
  -9   3  -5   47.03    3.69
  -9  -3  -5   47.26    3.32
   9  -3   6    4.18    1.71
   9  -3   6    2.30    1.00
   9   3   6    3.75    1.51
   9   3   6    1.99    0.89
  -9   3  -6    2.56    1.61
  -9  -3  -6    2.71    1.37
   9  -3   7    8.30    2.29
   9  -3   7    7.44    1.21
   9   3   7    6.76    1.95
   9   3   7    6.50    1.32
  -9   3  -7    5.68    1.71
  -9  -3  -7    7.48    1.77
   9  -3   8    1.47    0.76
   9  -3   8   -1.26    1.59
   9   3   8    1.33    1.15
   9   3   8   -0.75    1.29
  -9   3  -8   -0.49    1.40
  -9  -3  -8   -0.32    1.11
   9  -3   9   -1.34    1.71
   9  -3   9   -0.62    0.86
   9   3   9   -1.44    1.44
   9   3   9   -0.60    1.17
  -9  -3  -9   -0.03    1.15
   9  -3  10   -0.94    1.48
   9  -3  10    1.56    1.01
   9   3  10   -1.18    1.44
  -9   3 -10    1.54    1.30
  -9  -3 -10    0.69    1.22
   9   3  11    9.76    2.65
   9  -3  11   10.46    2.89
   9  -3  11   10.59    1.70
   9   3  11    7.81    2.68
  -9   3 -11   16.87    2.91
  -9  -3 -11   10.82    2.09
   9  -3  12    2.52    2.62
   9   3  12    0.33    1.68
   9   3  12    2.25    2.08
  -9   3 -12   -0.54    2.10
  -9  -3 -12    3.69    1.56
   9  -3  13   10.13    3.19
   9   3  13    5.76    2.86
  -9   3 -13    0.67    2.85
  -9  -3 -13    5.31    2.01
  -9  -3 -13    7.41    2.66
   9  -3  14    8.25    3.10
   9   3  14   -1.01    2.84
  -9   3 -14   -0.38    2.49
  -9  -3 -14    6.00    2.64
   9  -3  15    2.65    2.64
   9   3  15   -2.40    2.63
  -9   3 -15   -1.29    2.30
  -9  -3 -15   -1.34    2.32
   9  -3  16    0.86    2.61
   9   3  16   -1.87    3.01
  -9   3 -16    2.36    2.51
  -9  -3 -16    1.81    2.63
   9  -5 -18    2.18    2.40
  -9  -5  18    1.68    2.53
  -9   5  18   -1.11    2.13
   9   5 -17    7.70    3.19
   9  -5 -17    9.21    3.83
  -9  -5  17    0.14    3.61
  -9   5  17    6.72    3.40
   9   5 -16    4.85    2.21
   9  -5 -16   -1.25    2.40
  -9  -5  16    1.81    3.01
  -9   5  16    3.73    2.66
   9   5 -15   15.96    3.65
   9   5 -15   13.11    3.23
   9  -5 -15   14.44    4.11
  -9  -5  15   16.94    3.91
  -9   5  15   18.20    3.75
   9   5 -14    1.42    2.17
   9   5 -14    1.16    1.79
   9  -5 -14   -2.37    2.32
  -9  -5  14    1.66    2.07
  -9   5  14    1.74    1.98
   9   5 -13    1.80    2.06
   9   5 -13    3.38    1.63
   9  -5 -13    2.43    2.30
  -9  -5  13   -0.21    2.13
  -9   5  13    0.79    2.00
   9   5 -12    4.28    1.71
   9   5 -12    0.39    1.28
   9  -5 -12   -1.71    1.48
  -9  -5  12   -1.83    1.64
  -9   5  12    0.98    1.54
   9   5 -11   29.16    3.33
   9   5 -11   27.78    2.91
   9  -5 -11   25.70    4.00
  -9  -5  11   27.15    3.39
  -9   5  11   28.69    3.52
   9   5 -10    9.64    1.86
   9   5 -10   11.06    2.61
   9  -5 -10   12.08    2.53
  -9  -5  10    9.03    2.50
  -9   5  10    7.94    1.90
   9   5  -9   81.46    5.47
   9   5  -9   82.02    4.67
   9  -5  -9   86.29    5.65
  -9  -5   9   88.30    5.36
  -9   5   9   68.59    2.94
  -9   5   9   85.55    5.44
   9   5  -8    1.69    1.76
   9   5  -8    1.07    1.43
   9  -5  -8    1.83    2.03
  -9  -5   8    3.50    1.49
  -9   5   8    3.48    0.83
  -9   5   8    3.90    1.69
   9   5  -7   54.18    4.24
   9   5  -7   50.25    3.50
   9  -5  -7   47.28    3.91
  -9  -5   7   55.52    3.24
  -9   5   7   53.92    3.74
  -9   5   7   50.17    2.61
   9   5  -6    5.16    1.53
   9   5  -6    7.71    1.64
   9  -5  -6    5.62    1.67
  -9  -5   6    4.88    1.20
  -9   5   6    8.17    1.11
  -9   5   6    4.94    1.54
   9   5  -5   11.35    1.86
   9   5  -5   15.21    1.97
   9  -5  -5   15.50    2.51
  -9  -5   5   13.18    1.26
  -9   5   5    9.48    1.51
  -9   5   5   10.73    1.84
   9   5  -4    1.83    1.14
   9   5  -4    2.35    1.31
   9  -5  -4    4.00    1.42
  -9  -5   4    3.04    0.74
  -9   5   4    3.01    1.08
  -9   5   4    2.94    1.22
   9   5  -3  124.34    5.77
   9  -5  -3  124.02    5.74
  -9  -5   3  123.85    3.57
  -9  -5   3  126.48    6.15
  -9   5   3  123.72    5.31
  -9   5   3  125.17    5.32
   9   5  -2   17.93    1.89
   9  -5  -2   20.75    2.39
  -9  -5   2   20.72    1.18
  -9  -5   2   22.61    2.54
  -9   5   2   18.18    2.10
  -9   5   2   21.84    2.02
   9   5  -1  102.05    5.06
   9  -5  -1  122.78    5.15
  -9  -5   1  105.36    5.37
  -9  -5   1  116.69    3.11
  -9   5   1  116.82    5.18
  -9   5   1  113.36    5.33
   9   5   0    5.81    1.63
   9  -5   0    6.19    1.16
   9  -5   0    6.28    1.18
  -9  -5   0    5.63    1.49
  -9  -5   0    4.80    0.62
  -9   5   0    6.47    1.59
   9   5   1    7.62    0.73
   9   5   1    6.45    1.73
   9  -5   1    9.36    1.52
   9  -5   1   12.53    1.37
  -9  -5  -1    3.93    1.71
  -9   5  -1    5.50    1.81
   9   5   2   -0.13    1.11
   9   5   2    0.22    0.40
   9  -5   2   -0.49    1.08
   9  -5   2    2.27    0.77
  -9  -5  -2    1.48    1.20
  -9   5  -2    1.35    1.25
   9   5   3   61.98    2.48
   9   5   3   62.99    4.13
   9  -5   3   66.91    3.96
   9  -5   3   65.60    2.90
  -9  -5  -3   65.01    4.18
  -9   5  -3   66.40    4.13
   9   5   4   13.18    1.93
   9   5   4   13.31    1.29
   9  -5   4   11.89    1.19
   9  -5   4   14.25    2.01
  -9  -5  -4   14.96    2.18
  -9   5  -4   12.01    1.96
   9   5   5   67.15    4.36
   9   5   5   60.58    2.98
   9  -5   5   57.44    4.54
   9  -5   5   60.71    2.75
  -9  -5  -5   69.28    4.25
  -9   5  -5   57.49    4.22
   9   5   6    1.42    1.38
   9   5   6    0.79    0.82
   9  -5   6    0.03    0.58
   9  -5   6    2.07    1.62
  -9  -5  -6    1.03    1.02
  -9   5  -6   -0.54    1.14
   9   5   7   -0.70    1.11
   9   5   7   -0.84    0.87
   9  -5   7    0.31    1.55
   9  -5   7    0.80    0.60
  -9  -5  -7   -0.95    1.02
  -9   5  -7   -1.03    1.09
   9   5   8   -0.26    0.84
   9   5   8    0.71    1.03
   9  -5   8    0.28    1.36
  -9  -5  -8    0.34    1.06
  -9   5  -8   -0.32    1.19
   9   5   9   13.36    2.90
   9   5   9   15.30    2.32
   9  -5   9   13.27    3.37
  -9  -5  -9   15.37    2.19
  -9   5  -9   15.53    2.61
   9   5  10    3.20    1.95
   9   5  10    1.49    1.70
   9  -5  10    1.85    2.39
  -9  -5 -10    0.08    1.35
  -9   5 -10    2.93    1.67
   9   5  11    8.28    2.78
   9   5  11    7.67    2.46
   9  -5  11   13.30    3.31
  -9  -5 -11    4.49    1.89
  -9   5 -11    8.94    3.02
   9   5  12   -1.07    1.54
   9  -5  12    0.46    1.58
  -9   5 -12    0.66    1.80
   9   5  13    1.99    2.69
  -9  -5 -13    9.03    2.91
  -9   5 -13    1.71    2.89
   9   5  14   -0.66    2.57
   9  -5  14    0.88    3.33
  -9  -5 -14    1.87    2.59
  -9   5 -14    3.31    2.26
   9   5  15   -0.58    2.72
   9  -5  15   -2.90    3.37
  -9   5 -15   -0.42    2.72
   9   7 -16    8.77    3.63
   9  -7 -16    9.63    4.12
  -9  -7  16    8.42    3.03
  -9   7  16   -0.78    2.80
   9   7 -15    2.81    2.55
   9  -7 -15   -2.04    2.36
  -9  -7  15    0.66    2.43
  -9   7  15    3.45    2.53
   9   7 -14   -0.32    3.09
   9  -7 -14    9.34    3.39
  -9  -7  14    5.40    2.86
  -9   7  14    5.40    2.47
   9   7 -13    0.34    2.58
  -9  -7  13    1.00    2.86
  -9   7  13    6.62    2.54
   9   7 -12    2.44    1.66
   9   7 -12    5.30    2.80
   9  -7 -12   11.44    2.63
  -9  -7  12    2.35    2.60
  -9   7  12    6.26    2.67
   9   7 -11    6.61    2.95
   9   7 -11    8.29    1.83
   9  -7 -11    6.02    3.19
  -9  -7  11    5.42    2.57
  -9   7  11   10.88    2.82
   9   7 -10   33.76    4.52
   9   7 -10   37.13    3.41
   9  -7 -10   40.99    4.92
  -9  -7  10   33.51    3.74
  -9   7  10   40.49    3.98
   9   7  -9   12.90    2.76
   9   7  -9   15.01    2.02
   9  -7  -9    9.83    3.12
  -9  -7   9   10.22    2.50
  -9   7   9   18.88    2.84
   9   7  -8   53.37    4.73
   9   7  -8   59.68    3.91
   9  -7  -8   56.20    5.10
  -9  -7   8   57.97    4.16
  -9   7   8   51.23    4.53
   9   7  -7    0.81    1.75
   9   7  -7    1.94    1.34
   9  -7  -7   -0.34    1.68
  -9  -7   7    2.31    1.43
  -9   7   7    1.95    0.82
  -9   7   7    4.75    1.68
   9   7  -6   -1.15    0.88
   9   7  -6   -0.54    1.24
   9  -7  -6    0.06    1.08
  -9  -7   6   -0.19    0.85
  -9   7   6    3.54    1.11
  -9   7   6   -0.23    0.63
   9   7  -5    1.90    1.64
   9   7  -5    0.64    1.18
   9  -7  -5    4.01    1.55
  -9  -7   5   -0.32    0.96
  -9   7   5    1.59    0.90
  -9   7   5    0.80    1.37
   9   7  -4   35.98    3.03
   9   7  -4   38.06    3.82
   9  -7  -4   45.78    3.94
  -9  -7   4   40.38    2.42
  -9   7   4   41.50    3.03
  -9   7   4   43.40    3.54
   9   7  -3   28.43    2.91
   9   7  -3   29.74    2.63
   9  -7  -3   27.92    3.26
  -9  -7   3   28.49    2.04
  -9   7   3   29.81    3.05
  -9   7   3   32.78    2.63
   9   7  -2  108.03    5.58
   9  -7  -2  110.49    5.55
  -9  -7   2   95.13    3.82
  -9   7   2  101.95    5.30
  -9   7   2   96.21    5.59
   9   7  -1   26.46    2.81
   9  -7  -1   24.86    2.54
  -9  -7   1   24.31    1.69
  -9  -7   1   23.34    2.63
  -9   7   1   27.76    2.75
  -9   7   1   25.06    2.83
   9   7   0   16.69    2.09
   9  -7   0   14.87    1.74
   9  -7   0   15.19    2.12
  -9  -7   0   17.59    2.51
  -9  -7   0   17.18    1.44
  -9   7   0   13.86    2.14
   9   7   1   -0.02    0.60
   9   7   1    0.73    1.20
   9  -7   1    0.06    0.76
   9  -7   1    0.53    1.31
  -9  -7  -1    1.04    1.07
  -9   7  -1    2.13    1.39
   9   7   2   19.75    2.57
   9   7   2   17.94    1.50
   9  -7   2   16.99    2.70
   9  -7   2   17.47    1.48
  -9  -7  -2   14.24    2.50
  -9   7  -2   19.61    2.96
   9   7   3    1.27    1.55
   9   7   3    2.38    0.79
   9  -7   3    0.66    0.63
   9  -7   3    2.30    1.68
  -9  -7  -3    0.53    1.41
  -9   7  -3    2.10    1.78
   9   7   4   32.46    3.73
   9   7   4   36.50    2.35
   9  -7   4   36.02    3.76
  -9  -7  -4   33.04    3.23
  -9   7  -4   34.31    3.54
   9   7   5    4.47    1.27
   9   7   5    6.20    2.01
   9  -7   5    3.74    1.86
  -9  -7  -5    3.36    1.68
  -9   7  -5    4.01    2.18
   9   7   6    7.57    2.36
   9   7   6   14.62    1.79
   9  -7   6    7.75    2.69
  -9  -7  -6    9.31    2.11
  -9   7  -6    8.93    2.80
   9   7   7    3.34    2.12
   9   7   7    3.35    1.60
   9  -7   7    5.64    2.56
  -9  -7  -7    4.89    1.63
  -9   7  -7    5.20    2.05
   9   7   8   -0.48    1.11
   9   7   8    0.13    1.49
   9  -7   8    2.19    1.43
  -9  -7  -8   -0.74    0.89
  -9   7  -8    1.45    1.60
   9   7   9   -0.77    1.55
   9   7   9    2.47    1.59
   9  -7   9    5.66    2.38
  -9  -7  -9    0.57    1.22
  -9   7  -9    0.75    1.77
   9   7  10    6.63    2.85
   9   7  10    8.57    2.48
   9  -7  10    9.85    3.38
  -9   7 -10    4.95    2.49
   9   7  11    1.57    1.84
   9  -7  11    1.67    3.31
  -9   7 -11    7.74    2.95
   9   7  12    4.99    2.62
   9  -7  12    2.81    2.60
  -9  -7 -12    2.50    2.38
  -9   7 -12    6.34    3.14
   9   7  13    3.01    2.55
   9  -7  13   -0.35    3.38
  -9  -7 -13    3.33    2.73
  -9   7 -13    0.15    2.82
   9  -7  14   -0.33    3.02
  -9  -7 -14    0.41    2.01
  -9   7 -14    0.70    2.11
   9  -9 -15   -0.86    2.95
  -9  -9  15    1.74    2.83
  -9   9  15   -0.03    2.52
   9  -9 -14   -0.13    3.23
   9   9 -14   -1.06    3.03
  -9  -9  14   -2.69    3.04
  -9   9  14   -1.01    2.22
   9   9 -13    6.68    2.99
   9  -9 -13    1.05    3.12
  -9   9  13   -1.96    2.69
   9   9 -12    7.58    3.53
   9  -9 -12    6.54    3.78
  -9  -9  12    8.18    3.11
  -9   9  12    5.93    3.13
   9   9 -11    0.69    2.32
   9  -9 -11    6.50    3.12
  -9  -9  11    4.77    2.46
  -9   9  11    1.21    2.62
   9  -9 -10   30.33    4.29
   9   9 -10   39.06    4.97
  -9  -9  10   24.92    4.20
  -9   9  10   24.51    4.24
   9   9  -9    0.39    2.56
   9  -9  -9    6.52    2.77
  -9  -9   9    0.41    2.19
  -9   9   9    3.76    1.85
   9   9  -8   23.77    2.82
   9  -9  -8   29.56    4.18
   9   9  -8   24.87    3.73
  -9  -9   8   28.22    3.22
  -9   9   8   23.90    3.68
   9   9  -7    3.07    2.40
   9   9  -7    4.40    1.41
   9  -9  -7    5.50    2.40
  -9  -9   7   -0.80    1.59
  -9   9   7    4.09    2.08
   9   9  -6    2.84    1.59
   9  -9  -6    6.12    2.32
   9   9  -6    5.34    2.34
  -9  -9   6    4.46    1.69
  -9   9   6    3.37    1.67
  -9   9   6   -0.07    1.15
   9   9  -5    1.81    1.47
   9   9  -5    1.62    1.75
   9  -9  -5    1.14    1.81
  -9  -9   5    0.22    1.24
  -9   9   5    3.75    1.38
  -9   9   5    4.03    1.88
   9   9  -4   45.65    4.22
   9  -9  -4   37.01    3.81
   9   9  -4   41.64    3.57
  -9  -9   4   39.70    3.08
  -9   9   4   43.92    3.34
  -9   9   4   38.45    3.72
   9   9  -3    3.54    1.68
   9   9  -3    3.69    1.79
   9  -9  -3    2.71    1.69
  -9  -9   3    5.25    1.43
  -9   9   3    4.57    1.76
  -9   9   3    4.59    1.78
   9   9  -2   82.46    6.12
   9   9  -2   89.02    5.43
   9  -9  -2   86.86    5.02
  -9  -9   2   88.33    4.58
  -9   9   2   92.70    5.80
  -9   9   2   89.69    5.63
   9   9  -1    3.82    1.78
   9  -9  -1    3.33    1.34
  -9  -9   1    4.78    2.13
  -9   9   1    4.68    1.76
  -9   9   1    3.70    1.92
  -9  -9   1    4.05    1.28
   9   9   0   19.26    2.87
   9  -9   0   21.52    1.98
   9  -9   0   27.03    3.36
  -9  -9   0   18.65    3.21
  -9  -9   0   22.21    2.13
  -9   9   0   18.18    3.13
   9  -9   1    1.42    2.00
   9   9   1    1.81    1.29
   9   9   1    3.63    1.71
  -9  -9  -1    2.33    1.88
  -9   9  -1    3.96    1.96
   9   9   2   10.10    2.54
   9   9   2    7.50    1.72
   9  -9   2    8.74    2.15
  -9  -9  -2    5.61    2.33
  -9   9  -2    6.27    2.13
   9   9   3    0.35    0.87
   9  -9   3    1.08    1.65
  -9  -9  -3    0.21    1.36
  -9   9  -3   -1.36    1.56
   9   9   4   59.54    4.01
   9   9   4   57.82    5.18
   9  -9   4   58.89    5.49
  -9  -9  -4   61.24    4.77
  -9   9  -4   65.31    5.33
   9   9   5    8.32    2.04
   9   9   5    1.32    1.23
   9  -9   5   -0.13    2.08
  -9  -9  -5    0.28    1.60
  -9   9  -5   -1.39    2.17
   9   9   6    4.09    2.03
   9   9   6    5.93    1.65
   9  -9   6    5.39    2.82
  -9  -9  -6    3.54    1.93
  -9   9  -6    4.88    2.65
   9   9   7    5.16    1.84
   9   9   7    6.30    2.54
   9  -9   7    5.91    2.91
  -9  -9  -7    1.97    1.72
  -9   9  -7    3.09    2.72
   9  -9   8    2.04    2.50
   9   9   8    0.33    2.16
   9   9   8    0.76    1.58
  -9   9  -8    1.23    2.32
   9   9   9    2.10    1.87
   9   9   9   -0.15    1.81
   9  -9   9    3.76    2.23
  -9   9  -9   -0.45    2.04
   9   9  10    1.34    2.06
   9  -9  10    1.00    3.18
  -9   9 -10   -0.30    2.51
  -9  -9 -10    3.17    2.50
   9  -9  11    0.17    2.71
  -9  -9 -11    0.13    2.85
  -9   9 -11    8.52    3.22
   9  -9  12    8.12    3.40
  -9  -9 -12    6.54    2.71
  -9   9 -12   -0.42    2.89
   9 -11 -12   -1.28    2.56
   9  11 -12   -0.44    2.45
  -9  11  12    0.97    1.77
   9  11 -11   -0.75    2.92
   9 -11 -11    0.31    3.18
  -9 -11  11    3.84    2.86
  -9  11  11    1.54    2.35
   9 -11 -10    7.55    4.41
   9  11 -10   16.70    3.63
  -9  11  10   11.87    3.76
  -9 -11  10    8.80    3.61
   9  11  -9   41.82    5.94
   9 -11  -9   34.19    5.51
  -9 -11   9   26.38    4.42
  -9  11   9   37.59    4.62
   9 -11  -8    5.98    3.52
   9  11  -8   11.07    3.58
  -9  11   8    7.76    3.24
  -9 -11   8    9.83    3.13
   9 -11  -7   20.55    3.83
   9  11  -7   12.53    4.01
  -9 -11   7   11.18    3.19
  -9  11   7   14.82    3.08
   9 -11  -6    0.30    2.02
  -9 -11   6    1.25    1.74
  -9  11   6   -0.02    2.07
   9  11  -5    4.87    1.94
   9  11  -5   -1.04    2.58
   9 -11  -5    6.68    2.52
  -9  11   5    3.76    2.61
  -9 -11   5    7.04    2.22
   9  11  -4    9.73    2.38
   9  11  -4    6.85    2.81
   9 -11  -4    9.71    2.37
  -9  11   4    8.88    2.21
  -9  11   4   11.20    3.15
  -9 -11   4    9.00    2.53
   9 -11  -3   24.93    3.64
   9  11  -3   27.27    4.13
   9  11  -3   24.17    3.26
  -9  11   3   20.30    3.54
  -9 -11   3   25.49    2.99
  -9  11   3   23.03    3.53
   9  11  -2    6.31    2.41
   9  11  -2    5.58    2.22
  -9  11   2    9.04    2.70
  -9 -11   2    4.45    2.19
  -9  11   2    5.78    2.30
   9  11  -1   13.99    2.81
   9 -11  -1   14.15    2.84
  -9 -11   1   12.68    2.56
  -9  11   1   12.98    3.11
   9 -11   0    6.92    2.75
   9  11   0    4.09    2.28
  -9 -11   0    8.12    2.77
  -9  11   0    3.99    2.58
  -9 -11   0    6.20    1.87
   9 -11   1    1.86    2.53
   9  11   1   -0.18    2.22
  -9  11  -1    3.40    2.61
  -9 -11  -1    7.88    2.40
  -9 -11  -1    5.22    1.85
   9  11   2    4.26    1.84
   9  11   2    0.30    1.80
   9 -11   2    2.22    2.06
  -9  11  -2    5.55    2.13
  -9 -11  -2    0.01    2.22
   9 -11   3   16.72    3.71
   9  11   3    8.29    2.57
   9  11   3   14.01    2.79
  -9  11  -3   12.41    3.12
  -9 -11  -3   14.55    3.15
   9  11   4    9.05    3.20
   9  11   4    7.54    2.50
   9 -11   4    9.39    3.39
  -9  11  -4    9.57    3.56
  -9 -11  -4   12.78    2.92
   9  11   5   18.60    3.03
   9 -11   5   17.59    3.46
   9  11   5   18.88    3.70
  -9  11  -5   18.06    4.19
  -9 -11  -5    7.58    2.92
   9 -11   6   -2.58    2.36
   9  11   6    1.16    2.10
  -9  11  -6   -0.14    2.43
   9  11   7    0.41    1.96
   9 -11   7    2.03    2.20
  -9  11  -7    0.48    2.26
   9 -11   8   -1.24    2.81
  -9  11  -8    1.03    2.67
  -9 -11  -8   -1.68    2.49
   9 -11   9    4.53    2.86
  -9  11  -9    0.98    3.25
  -9 -11  -9    0.96    3.09
   9  13  -6    1.94    2.66
   9  13  -5    1.31    2.94
   9  13  -4    0.02    2.02
  -9  13   4   -1.13    2.36
   9  13  -3    3.97    3.41
  -9  13   3    6.71    2.86
   9  13  -2    4.72    3.25
   9 -13  -2    3.66    3.14
   9 -13  -1   15.07    4.14
  -9 -13   1    6.89    3.16
  -9  13   1   13.78    3.67
   9  13   0   -0.32    2.09
   9 -13   0    0.49    2.45
  -9 -13   0   -1.37    2.44
  -9  13   0   -1.16    2.34
   9  13   1    8.23    2.80
   9 -13   1    2.98    3.06
  -9 -13  -1   -0.07    2.82
  -9  13  -1    1.09    2.95
   9  13   2    6.52    2.81
   9 -13   2   -0.78    2.53
  -9 -13  -2    6.09    2.84
  -9  13  -2   -0.07    3.09
   9  13   3    0.97    2.20
   9 -13   3    0.92    2.36
  -9  13  -3    3.58    3.02
   9 -13   4    7.23    3.43
  -9  13  -4    0.14    3.27
  10   0 -19    3.04    3.26
 -10   0  19    1.45    3.06
  10   0 -18    4.91    3.70
 -10   0  18    9.35    3.53
  10   0 -17   -1.62    2.65
 -10   0  17    4.92    2.60
  10   0 -16   19.53    3.91
 -10   0  16   16.84    3.92
  10   0 -15   -1.31    2.23
  10   0 -14   26.32    4.00
 -10   0  14   19.52    2.54
 -10   0  14   26.60    3.54
  10   0 -13    2.48    1.82
 -10   0  13   -0.91    1.08
 -10   0  13    1.58    1.48
  10   0 -12   18.88    3.39
 -10   0  12   17.69    2.24
 -10   0  12   17.42    2.65
  10   0 -11   -0.93    1.89
 -10   0  11    2.13    1.14
 -10   0  11    0.12    1.39
  10   0 -10  204.61    9.62
 -10   0  10  220.55    8.31
 -10   0  10  216.63    8.34
  10   0  -9   -0.11    1.21
 -10   0   9    0.89    0.97
 -10   0   9   -0.21    0.93
  10   0  -8   78.63    5.21
 -10   0   8   72.32    3.94
 -10   0   8   69.57    3.35
  10   0  -7    3.10    1.20
 -10   0   7    0.12    0.77
  10   0  -6   12.21    1.81
 -10   0   6   11.42    1.69
 -10   0   6    9.08    1.00
  10   0  -5    0.06    1.07
 -10   0   5   -0.52    0.87
 -10   0   5    0.21    0.34
  10   0  -4   78.90    4.08
 -10   0   4   71.82    3.99
 -10   0   4   75.10    2.31
  10   0  -3    0.43    0.96
 -10   0   3    0.98    0.91
 -10   0   3    0.09    0.25
  10   0  -2   44.20    3.05
 -10   0   2   43.88    2.74
  10   0  -1   -0.12    0.18
  10   0  -1   -0.03    0.70
 -10   0   1    0.46    0.91
  10   0   0    5.00    0.47
  10   0   0    6.42    1.39
 -10   0   0    4.78    1.43
  10   0   1   -0.17    0.33
  10   0   1    1.31    0.84
 -10   0  -1   -0.86    0.83
  10   0   2   20.98    1.30
  10   0   2   20.30    2.12
 -10   0  -2   20.93    2.40
  10   0   3   -0.62    0.85
 -10   0  -3    0.20    0.88
  10   0   4  111.67    4.62
  10   0   4  101.61    5.10
 -10   0  -4  104.17    5.11
  10   0   5   -0.49    0.78
 -10   0  -5    0.21    0.94
  10   0   6    8.30    1.98
  10   0   6   12.71    1.91
 -10   0  -6   11.14    2.10
  10   0   7   -0.95    1.29
  10   0   7   -0.36    1.11
  10   0   8   28.75    3.25
  10   0   8   31.81    2.96
 -10   0  -8   33.58    3.50
  10   0   9   -0.01    1.43
  10   0   9    0.07    0.93
 -10   0  -9    0.69    1.27
  10   0  10   11.65    3.08
  10   0  10   15.90    2.50
 -10   0 -10   10.68    2.54
  10   0  11   -1.48    1.91
  10   0  11    0.20    1.40
  10   0  12    0.35    2.20
  10   0  12   -1.02    1.51
 -10   0 -12    2.69    1.68
  10   0  13   -1.40    2.62
 -10   0 -13    3.91    2.01
 -10   0 -13    1.45    2.08
  10   0  14    0.92    2.73
 -10   0 -14    3.32    2.23
 -10   0 -14    0.10    2.17
  10   0  15    8.13    3.09
 -10   0 -15   -1.66    2.37
 -10   0 -15    1.70    2.34
  10   0  16    0.32    2.56
  10  -2 -19    2.10    3.77
 -10   2  19    3.18    2.74
 -10  -2  19    3.53    3.35
  10  -2 -18    2.25    2.89
  10   2 -18    0.80    2.97
 -10   2  18    3.08    2.94
 -10  -2  18    4.88    3.03
  10  -2 -17    2.80    3.26
  10   2 -17    5.93    3.12
 -10   2  17   11.58    3.28
 -10  -2  17    5.41    3.10
  10   2 -16    1.71    2.81
  10  -2 -16    8.66    3.15
 -10   2  16    5.98    2.75
 -10  -2  16    2.58    2.84
  10  -2 -15    0.66    2.31
  10   2 -15   -0.18    2.12
 -10   2  15   -1.13    1.97
 -10  -2  15    4.60    2.00
  10  -2 -14    6.49    2.79
  10   2 -14    4.55    2.28
 -10   2  14    5.77    2.47
 -10  -2  14    7.28    2.49
  10  -2 -13   13.66    2.94
  10   2 -13   10.73    3.03
 -10   2  13   11.10    2.28
 -10  -2  13   14.09    2.68
  10  -2 -12    7.96    3.13
  10   2 -12   16.78    2.84
 -10   2  12    9.41    1.39
 -10   2  12   10.81    1.96
 -10  -2  12   12.56    2.15
 -10  -2  12   13.32    2.44
  10  -2 -11   14.41    3.32
  10   2 -11   17.92    2.97
 -10   2  11   15.47    2.49
 -10   2  11   12.36    1.52
 -10  -2  11   17.58    2.35
 -10  -2  11   17.20    2.25
  10  -2 -10   22.58    2.87
  10   2 -10   18.26    2.99
 -10   2  10   16.06    2.32
 -10   2  10   16.52    1.70
 -10  -2  10   16.09    2.24
 -10  -2  10   17.86    2.29
  10  -2  -9   23.50    3.34
  10   2  -9   19.31    2.92
 -10   2   9   18.21    1.98
 -10   2   9   19.47    2.06
 -10  -2   9   23.74    2.51
 -10  -2   9   17.32    1.95
  10  -2  -8   14.76    2.71
  10   2  -8   13.86    2.49
 -10   2   8   11.40    1.59
 -10   2   8   11.04    1.71
 -10  -2   8   13.90    2.07
 -10  -2   8   11.83    1.61
  10  -2  -7    0.61    1.63
  10   2  -7    1.43    1.41
 -10   2   7    1.19    1.00
 -10   2   7    4.09    0.96
 -10  -2   7    1.23    1.03
 -10  -2   7    0.13    0.69
  10  -2  -6    4.00    1.58
  10   2  -6    0.23    1.50
 -10   2   6    2.12    0.77
 -10   2   6    1.41    1.02
 -10  -2   6   -0.45    1.28
 -10  -2   6    1.86    0.68
  10  -2  -5   14.03    2.37
  10   2  -5   15.75    2.14
 -10   2   5   16.83    1.80
 -10   2   5   15.24    1.29
 -10  -2   5   16.69    1.83
 -10  -2   5   14.71    0.97
  10  -2  -4   91.25    4.99
  10   2  -4   94.32    4.87
 -10   2   4   99.66    3.50
 -10   2   4   99.19    4.47
 -10  -2   4   96.88    4.58
 -10  -2   4   91.15    2.07
  10  -2  -3   78.51    4.17
  10   2  -3   86.18    4.49
 -10   2   3   80.62    4.03
 -10   2   3   81.49    2.96
 -10  -2   3   78.43    4.33
  10  -2  -2   49.59    3.08
  10   2  -2   47.98    3.05
 -10   2   2   52.81    3.14
 -10   2   2   52.14    2.20
 -10  -2   2   49.19    3.11
  10  -2  -1    9.86    1.63
  10  -2  -1    6.91    0.76
  10   2  -1    8.77    1.35
 -10   2   1    6.42    1.35
 -10  -2   1    8.93    1.70
  10  -2   0    2.56    1.03
  10  -2   0    0.80    0.55
  10   2   0   -0.89    1.00
 -10   2   0   -0.15    0.89
 -10  -2   0    2.98    1.17
  10  -2   1   15.54    1.31
  10  -2   1   16.52    1.78
  10   2   1   17.60    2.10
 -10   2  -1   17.09    2.00
 -10  -2  -1   16.93    2.21
  10  -2   2   34.01    2.45
  10  -2   2   35.19    1.94
  10   2   2   29.88    2.53
  10   2   2   28.86    0.97
 -10   2  -2   35.56    2.83
 -10  -2  -2   34.34    2.62
  10  -2   3   49.88    2.74
  10  -2   3   49.35    3.02
  10   2   3   42.74    3.30
  10   2   3   45.78    1.70
 -10   2  -3   50.98    3.57
 -10  -2  -3   48.63    3.54
  10  -2   4   40.48    2.80
  10  -2   4   37.39    2.50
  10   2   4   43.15    3.27
  10   2   4   37.59    1.87
 -10   2  -4   36.82    3.30
 -10  -2  -4   34.21    3.11
  10  -2   5   23.82    2.41
  10  -2   5   17.43    2.03
  10   2   5   19.82    2.52
  10   2   5   19.55    1.52
 -10   2  -5   18.29    2.28
 -10  -2  -5   21.25    2.63
  10  -2   6    4.91    1.51
  10  -2   6    5.13    1.33
  10   2   6    1.55    1.53
  10   2   6    2.43    1.02
 -10   2  -6    3.86    1.45
 -10  -2  -6    5.13    1.59
  10  -2   7    4.03    1.78
  10  -2   7    4.89    1.36
  10   2   7    2.60    1.22
  10   2   7    4.94    1.73
 -10   2  -7    6.26    1.63
 -10  -2  -7    6.15    1.75
  10  -2   8    1.89    1.64
  10  -2   8    1.38    1.13
  10   2   8    3.15    1.45
  10   2   8    1.00    1.33
 -10   2  -8    0.96    1.32
 -10  -2  -8   -1.01    1.36
  10  -2   9    3.17    1.97
  10  -2   9    2.96    1.28
  10   2   9    6.22    1.70
  10   2   9    0.57    1.71
 -10   2  -9    3.03    1.54
 -10  -2  -9    0.94    1.67
  10  -2  10   11.09    2.98
  10  -2  10    5.72    1.81
  10   2  10    7.02    2.33
  10   2  10    7.19    2.33
 -10   2 -10    9.29    2.08
 -10  -2 -10   10.50    2.20
  10  -2  11    2.02    1.59
  10   2  11    5.42    2.23
  10   2  11    3.30    1.99
  10  -2  11    3.95    2.01
 -10   2 -11    4.56    1.84
 -10  -2 -11    1.20    1.84
  10  -2  12    2.07    2.57
  10  -2  12    3.79    1.38
  10   2  12    0.74    2.12
  10   2  12    4.77    2.38
 -10   2 -12    1.76    1.83
 -10  -2 -12    1.54    1.92
  10  -2  13    2.86    2.27
  10   2  13    1.12    2.29
 -10   2 -13    1.39    1.61
 -10   2 -13    0.80    1.39
 -10  -2 -13   -1.55    1.64
  10  -2  14    3.65    2.30
  10   2  14   -2.60    2.18
 -10   2 -14   -1.22    1.62
 -10  -2 -14    1.84    1.65
  10  -2  15    2.02    2.93
  10   2  15    1.93    2.76
 -10   2 -15    0.00    1.95
 -10  -2 -15    0.24    2.41
  10  -2  16   -1.26    3.58
  10   2  16    5.77    3.49
 -10   2 -16    4.93    3.03
 -10  -2 -16   -0.42    2.83
  10  -4 -18   -0.46    2.99
 -10   4  18   -1.54    2.64
 -10  -4  18   -1.07    2.92
  10  -4 -17    9.26    3.55
  10   4 -17    7.09    2.85
 -10  -4  17    6.68    3.67
 -10   4  17    3.03    3.22
  10   4 -16    2.83    1.75
  10   4 -16   -2.16    1.86
  10  -4 -16   -0.90    2.24
 -10   4  16   -0.28    1.85
 -10  -4  16    1.09    1.80
  10   4 -15    4.57    2.63
  10   4 -15   10.54    2.83
  10  -4 -15    7.76    3.18
 -10   4  15    7.51    2.87
 -10  -4  15    6.35    3.00
  10   4 -14    3.11    1.95
  10  -4 -14   -1.24    2.35
  10   4 -14    4.70    2.13
 -10   4  14   -0.51    2.03
  10   4 -13    6.35    2.44
  10  -4 -13    2.66    2.82
  10   4 -13    4.30    2.45
 -10   4  13   12.65    2.63
 -10  -4  13   12.79    2.78
  10  -4 -12    0.34    1.45
  10   4 -12   -0.38    1.51
  10   4 -12   -0.17    1.49
 -10   4  12    0.28    1.54
 -10  -4  12    2.01    1.53
  10  -4 -11   79.65    6.28
  10   4 -11   74.41    5.26
  10   4 -11   87.40    5.76
 -10   4  11   84.16    5.57
 -10  -4  11   83.60    5.26
  10  -4 -10   -1.34    2.09
  10   4 -10    6.27    1.66
  10   4 -10    4.74    1.88
 -10   4  10    7.37    1.86
 -10   4  10    2.81    0.99
 -10  -4  10    7.23    1.60
  10  -4  -9   16.30    2.87
  10   4  -9   20.58    2.81
  10   4  -9   20.84    2.30
 -10   4   9   23.69    2.70
 -10   4   9   18.46    1.58
 -10  -4   9   21.04    2.35
  10  -4  -8    2.25    2.28
  10   4  -8    1.78    1.71
  10   4  -8    4.11    1.73
 -10   4   8    5.09    1.09
 -10   4   8    4.42    1.50
 -10  -4   8    4.22    1.22
  10  -4  -7    3.85    2.04
  10   4  -7    0.09    0.93
  10   4  -7    5.05    1.51
 -10   4   7    3.59    1.30
 -10   4   7    2.69    1.07
 -10  -4   7    4.88    1.11
  10   4  -6   -0.14    1.01
  10  -4  -6   -0.36    1.36
 -10   4   6    0.36    0.96
 -10  -4   6   -0.48    1.11
 -10  -4   6    2.32    0.65
  10  -4  -5   38.51    3.32
  10   4  -5   40.81    3.27
 -10   4   5   39.34    2.77
 -10   4   5   45.53    2.88
 -10  -4   5   42.60    1.91
 -10  -4   5   36.01    3.35
  10  -4  -4   -1.34    1.35
  10   4  -4   -0.21    1.28
 -10   4   4    0.70    1.02
 -10   4   4    2.09    0.85
 -10  -4   4   -0.58    1.00
 -10  -4   4    1.23    0.53
  10  -4  -3   60.52    4.01
  10   4  -3   63.00    4.03
 -10   4   3   65.67    3.19
 -10   4   3   62.85    3.62
 -10  -4   3   60.53    1.79
 -10  -4   3   61.21    3.88
  10  -4  -2    1.34    1.19
  10   4  -2    0.53    0.95
 -10   4   2    2.02    0.92
 -10   4   2    0.90    1.14
 -10  -4   2    0.73    1.05
  10  -4  -1    8.57    1.69
  10   4  -1    9.16    1.82
 -10   4   1    8.83    1.81
 -10   4   1   11.05    1.44
 -10  -4   1   10.67    2.03
  10  -4   0   -0.13    0.89
  10  -4   0    1.13    1.03
  10   4   0    2.17    0.94
 -10   4   0   -0.37    0.97
 -10  -4   0    4.21    1.33
  10  -4   1    0.10    0.86
  10  -4   1    0.62    0.91
  10   4   1    0.55    0.92
 -10   4  -1    0.30    0.92
 -10  -4  -1    0.69    1.16
  10  -4   2    0.98    0.87
  10   4   2    1.57    1.03
  10   4   2    0.15    0.30
  10  -4   2   -0.83    0.75
 -10   4  -2   -0.88    1.08
 -10  -4  -2    0.65    1.14
  10  -4   3   76.26    4.13
  10  -4   3   77.87    3.67
  10   4   3   64.92    2.28
  10   4   3   73.08    4.60
 -10   4  -3   69.42    4.57
 -10  -4  -3   73.85    4.66
  10  -4   4    1.31    1.46
  10  -4   4    0.13    0.80
  10   4   4    2.58    0.69
  10   4   4    0.81    1.39
 -10   4  -4    3.27    1.29
  10  -4   5   52.66    3.87
  10  -4   5   47.79    2.61
  10   4   5   40.40    2.21
  10   4   5   39.95    3.63
 -10   4  -5   43.77    3.71
 -10  -4  -5   45.74    3.50
  10  -4   6    1.16    1.48
  10  -4   6    0.48    0.73
  10   4   6   -0.11    1.30
  10   4   6    0.09    0.68
 -10   4  -6    1.48    1.43
 -10  -4  -6    0.37    1.16
  10  -4   7   -0.62    1.49
  10  -4   7   -0.28    0.64
  10   4   7    0.91    1.09
 -10   4  -7   -0.99    1.13
 -10  -4  -7   -0.32    1.23
  10   4   8    3.92    1.68
  10  -4   8    3.71    1.82
  10  -4   8    0.19    0.82
  10   4   8    1.10    1.17
 -10   4  -8    0.81    1.37
 -10  -4  -8    0.47    1.33
  10  -4   9   16.75    3.27
  10  -4   9   14.30    1.63
  10   4   9   17.66    2.88
  10   4   9   15.67    2.38
 -10   4  -9   16.26    3.18
 -10  -4  -9   15.48    2.40
  10  -4  10    1.09    1.87
  10   4  10   -1.73    1.56
  10   4  10    1.42    1.29
 -10   4 -10   -1.32    1.34
 -10  -4 -10    1.27    1.22
  10  -4  11    6.94    3.18
  10   4  11    9.70    2.44
  10   4  11    7.37    2.73
 -10   4 -11    8.79    2.84
 -10  -4 -11    3.80    2.03
  10  -4  12    3.31    2.52
  10   4  12   -1.75    1.64
  10   4  12   -1.85    1.94
 -10   4 -12    0.05    1.79
 -10  -4 -12   -1.47    1.46
  10  -4  13    1.28    2.50
  10   4  13   -1.29    2.05
 -10   4 -13   -0.09    2.09
 -10  -4 -13   -0.93    2.09
  10  -4  14    0.68    2.30
  10   4  14    0.14    2.49
 -10   4 -14    0.28    2.11
 -10  -4 -14    3.81    2.50
  10  -4  15    0.87    2.90
  10   4  15   -3.07    2.69
 -10   4 -15   -0.68    2.54
 -10  -4 -15    0.73    2.66
  10   6 -17    1.89    3.16
  10  -6 -17    7.09    3.69
 -10  -6  17    1.82    2.91
 -10   6  17    5.49    2.74
  10   6 -16    1.45    1.75
 -10  -6  16   -1.05    2.38
 -10   6  16   -0.57    2.19
  10   6 -15   -0.21    2.15
 -10  -6  15   -0.38    2.18
 -10   6  15    2.07    2.22
  10   6 -14   -0.78    1.68
  10   6 -14    0.63    1.41
  10  -6 -14   -1.87    1.81
 -10  -6  14   -1.16    1.57
 -10   6  14    3.10    1.72
  10   6 -13   10.67    3.23
  10   6 -13    7.48    2.52
  10  -6 -13   13.97    3.28
 -10  -6  13   10.11    3.03
 -10   6  13   14.56    3.22
  10   6 -12   13.12    2.65
  10   6 -12    9.68    2.50
  10  -6 -12    9.69    2.88
 -10  -6  12   11.35    2.95
 -10   6  12   12.25    3.08
  10   6 -11   28.59    3.88
  10   6 -11   20.72    2.99
  10  -6 -11   25.38    4.12
 -10  -6  11   22.79    3.48
 -10   6  11   23.15    3.53
  10   6 -10   15.23    2.68
  10   6 -10   21.63    3.03
  10  -6 -10   17.39    3.62
 -10  -6  10   22.12    3.15
 -10   6  10   24.57    3.18
  10   6  -9    4.89    1.78
  10   6  -9    4.74    1.62
  10  -6  -9    4.99    2.33
 -10  -6   9    3.02    1.50
 -10   6   9    0.72    1.85
  10   6  -8   -0.18    1.38
  10   6  -8    1.16    1.33
  10  -6  -8    4.79    1.51
 -10  -6   8    3.22    1.16
 -10   6   8   -0.47    0.73
 -10   6   8    0.71    1.48
  10   6  -7   13.86    2.22
  10   6  -7   12.16    2.60
  10  -6  -7   13.08    2.86
 -10  -6   7   10.81    1.64
 -10   6   7   17.36    2.36
 -10   6   7   11.24    1.49
  10   6  -6    0.53    0.96
  10   6  -6   -0.66    1.15
  10  -6  -6    2.25    1.68
 -10  -6   6    0.46    0.86
 -10   6   6    0.85    0.96
 -10   6   6    0.30    1.22
  10   6  -5   42.18    3.62
  10   6  -5   45.50    3.47
  10  -6  -5   43.37    4.25
 -10  -6   5   44.45    2.47
 -10   6   5   41.55    3.02
 -10   6   5   44.87    3.57
  10   6  -4   55.42    3.97
  10  -6  -4   47.22    4.14
 -10  -6   4   49.14    2.40
 -10  -6   4   48.03    4.17
 -10   6   4   49.21    3.21
 -10   6   4   52.84    3.67
  10   6  -3   49.31    3.66
  10  -6  -3   53.96    4.07
 -10  -6   3   50.53    2.18
 -10  -6   3   54.43    3.90
 -10   6   3   51.96    3.62
 -10   6   3   52.34    3.68
  10   6  -2   20.93    2.23
  10  -6  -2   24.28    2.73
 -10  -6   2   22.46    1.43
 -10  -6   2   26.28    2.96
 -10   6   2   20.55    2.50
 -10   6   2   25.10    2.61
  10   6  -1   12.50    2.04
  10  -6  -1   11.48    1.87
 -10  -6   1    8.71    0.93
 -10  -6   1   10.96    1.89
 -10   6   1    8.56    1.58
 -10   6   1    8.02    1.95
  10   6   0    0.56    1.22
  10  -6   0    0.58    1.19
  10  -6   0   -0.40    1.07
 -10  -6   0    3.49    1.55
 -10  -6   0    1.36    0.55
  10   6   1    4.78    1.86
  10   6   1    5.36    0.86
  10  -6   1    8.43    1.81
  10  -6   1    6.34    1.35
 -10  -6  -1    7.42    1.61
 -10   6  -1    9.03    2.06
  10   6   2    4.01    0.74
  10   6   2    6.47    1.58
  10  -6   2    5.07    1.78
  10  -6   2    6.04    1.15
 -10  -6  -2    6.37    1.93
 -10   6  -2    4.43    1.64
  10   6   3   53.61    4.20
  10   6   3   48.80    2.48
  10  -6   3   50.01    3.95
  10  -6   3   48.60    2.77
 -10  -6  -3   53.14    4.20
 -10   6  -3   54.73    4.46
  10   6   4   30.55    1.93
  10   6   4   29.49    3.09
  10  -6   4   37.28    3.55
  10  -6   4   29.45    1.88
 -10  -6  -4   28.76    2.97
 -10   6  -4   29.22    3.26
  10   6   5    9.75    1.94
  10   6   5    9.62    1.28
  10  -6   5    8.91    1.08
  10  -6   5   14.71    2.60
 -10  -6  -5   11.95    2.38
 -10   6  -5    7.10    2.53
  10   6   6    5.82    2.21
  10   6   6    4.49    1.19
  10  -6   6    6.22    2.32
 -10  -6  -6    6.30    1.82
 -10   6  -6    3.33    2.21
  10   6   7    2.22    1.42
  10   6   7   -0.46    0.92
 -10  -6  -7   -0.61    1.32
 -10   6  -7    3.28    1.65
  10   6   8    2.81    1.88
  10   6   8    0.40    1.27
  10  -6   8    1.53    2.13
  10   6   9    5.94    2.57
  10   6   9    7.28    1.95
  10  -6   9    9.12    3.23
 -10  -6  -9    4.88    1.94
 -10   6  -9    7.65    2.32
  10   6  10    4.58    2.02
  10   6  10    5.24    2.66
  10  -6  10    5.61    2.74
 -10  -6 -10    5.88    1.76
 -10   6 -10    6.51    2.40
  10   6  11    2.25    2.33
  10   6  11    1.20    2.08
  10  -6  11    2.66    3.05
 -10   6 -11    3.75    2.24
  10   6  12   -1.39    1.18
  10   6  12    2.46    1.93
  10  -6  12    3.65    2.56
 -10   6 -12    1.55    1.99
  10   6  13    3.03    2.20
  10  -6  13    4.34    3.42
 -10  -6 -13    0.65    2.38
  10  -6  14    8.05    3.60
 -10  -6 -14    0.91    3.08
 -10   6 -14    0.08    2.48
  10   8 -15    4.62    3.35
  10  -8 -15    2.75    3.55
 -10  -8  15    1.10    3.32
 -10   8  15    6.41    3.44
  10   8 -14    4.32    2.74
  10  -8 -14    4.33    3.61
 -10  -8  14    2.63    3.27
 -10   8  14    6.94    3.36
  10  -8 -13    2.13    2.81
 -10   8  13    2.65    2.23
  10   8 -12    8.88    3.42
  10  -8 -12   15.10    3.77
 -10  -8  12    9.26    3.07
 -10   8  12    6.91    3.23
  10  -8 -11    2.85    2.91
 -10  -8  11    2.26    2.42
 -10   8  11    6.10    2.60
  10   8 -10   41.22    3.80
  10   8 -10   42.75    5.07
  10  -8 -10   43.49    4.81
 -10  -8  10   43.34    4.30
 -10   8  10   46.12    4.96
  10   8  -9    1.27    1.57
  10   8  -9    0.07    1.43
  10  -8  -9    2.40    2.06
 -10  -8   9    0.08    1.39
 -10   8   9   -0.84    1.65
  10   8  -8    7.11    2.19
  10   8  -8    4.95    1.65
  10  -8  -8    4.56    2.05
 -10  -8   8    4.11    1.76
 -10   8   8    3.71    1.82
  10   8  -7    3.95    1.77
  10   8  -7    0.32    1.43
  10  -8  -7    2.35    2.06
 -10  -8   7    0.66    1.29
 -10   8   7   -0.24    1.83
 -10   8   7    3.34    1.07
  10   8  -6    3.54    1.41
  10   8  -6    1.53    1.97
  10  -8  -6    0.25    1.83
 -10  -8   6    3.18    1.17
 -10   8   6    0.78    1.11
 -10   8   6    0.75    1.79
  10   8  -5   -1.44    1.61
  10  -8  -5    1.92    1.76
 -10  -8   5    0.72    0.97
 -10   8   5    0.00    1.14
 -10   8   5    1.90    1.53
  10   8  -4    5.29    2.34
  10   8  -4    6.11    1.94
  10  -8  -4    6.53    2.29
 -10  -8   4    5.31    1.35
 -10   8   4    8.63    1.82
 -10   8   4    8.46    2.17
  10   8  -3   -1.10    1.34
  10  -8  -3   -1.11    1.40
 -10  -8   3    2.67    0.85
 -10   8   3   -0.84    1.48
 -10   8   3    0.26    1.27
  10   8  -2    0.71    1.32
  10  -8  -2   -0.45    1.19
 -10  -8   2   -0.68    0.65
 -10  -8   2   -0.41    1.22
 -10   8   2    0.70    1.02
 -10   8   2   -0.72    1.12
  10   8  -1    0.40    1.33
  10  -8  -1    1.15    1.05
 -10  -8   1   -0.54    0.64
 -10  -8   1   -0.43    1.15
 -10   8   1    0.78    1.29
 -10   8   1    1.55    1.13
  10   8   0    3.61    1.96
  10  -8   0    9.16    1.39
  10  -8   0    6.11    2.11
 -10  -8   0    7.33    1.17
 -10  -8   0    9.16    1.94
 -10   8   0    7.66    2.34
  10   8   1    0.32    1.13
  10  -8   1    1.14    0.82
  10  -8   1   -0.57    1.17
 -10  -8  -1   -0.42    1.54
 -10   8  -1    1.25    1.23
  10   8   2    5.09    1.11
  10   8   2    8.39    2.06
  10  -8   2    9.46    2.15
  10  -8   2    2.65    1.21
 -10  -8  -2    8.21    2.11
 -10   8  -2    4.68    2.37
  10   8   3    3.74    0.99
  10   8   3    1.85    1.77
  10  -8   3   -0.46    1.60
 -10  -8  -3    1.21    1.72
 -10   8  -3   -1.17    2.01
  10   8   4   33.87    2.61
  10   8   4   37.73    4.33
  10  -8   4   39.90    4.29
 -10  -8  -4   38.02    3.86
 -10   8  -4   36.52    4.60
  10   8   5    3.62    2.08
  10   8   5    8.06    1.44
  10  -8   5    6.42    2.60
 -10  -8  -5    5.47    2.24
 -10   8  -5   11.63    2.85
  10   8   6    7.26    2.69
  10   8   6    8.12    1.76
  10  -8   6    5.42    2.36
 -10  -8  -6   11.34    2.15
 -10   8  -6    6.00    2.42
  10   8   7   -1.95    1.75
  10   8   7    0.71    1.22
  10  -8   7   -0.10    1.79
 -10  -8  -7    3.32    1.39
 -10   8  -7    0.26    1.70
  10   8   8    1.67    1.33
  10   8   8   -1.22    1.73
  10  -8   8    0.76    2.45
 -10  -8  -8    3.63    1.56
 -10   8  -8   -0.71    2.14
  10   8   9   -0.49    2.03
  10   8   9    1.47    1.55
  10  -8   9    1.93    2.39
 -10   8  -9   -0.05    1.86
  10   8  10    6.21    2.65
  10  -8  10    8.54    3.33
 -10   8 -10   10.87    3.60
 -10   8 -11    1.48    2.24
  10  -8  12    7.90    4.43
 -10  -8 -12    5.49    2.88
 -10   8 -12   10.14    3.89
  10  10 -13    2.83    3.14
  10 -10 -13    2.99    3.12
 -10  10  13   -1.30    2.77
  10  10 -12   10.39    3.41
  10 -10 -12    9.27    4.27
 -10  10  12    7.36    3.14
  10  10 -11   15.16    4.22
  10 -10 -11    5.48    3.38
 -10 -10  11   15.01    3.64
 -10  10  11   11.75    3.83
  10  10 -10    7.86    3.08
  10 -10 -10    6.13    3.60
 -10 -10  10    8.75    3.08
 -10  10  10    6.70    2.72
  10  10  -9    5.75    2.74
  10 -10  -9    5.02    2.93
 -10 -10   9    2.60    2.01
 -10  10   9    1.13    2.12
  10  10  -8    5.58    2.66
  10 -10  -8    1.37    2.80
 -10 -10   8    3.33    2.25
 -10  10   8    0.87    2.56
  10  10  -7    0.81    1.68
  10  10  -7   -2.33    2.34
  10 -10  -7    1.12    2.22
 -10 -10   7    3.15    1.84
 -10  10   7    5.42    2.23
  10  10  -6    3.50    2.18
  10 -10  -6   -0.52    2.29
  10  10  -6    4.82    1.82
 -10 -10   6    3.99    1.87
 -10  10   6    0.41    2.33
  10  10  -5    5.05    2.71
  10  10  -5    5.91    2.18
  10 -10  -5    9.16    2.83
 -10 -10   5    5.78    1.80
 -10  10   5    3.95    1.90
 -10  10   5    5.60    2.63
  10  10  -4   34.45    4.00
  10  10  -4   35.23    3.70
  10 -10  -4   34.12    4.27
 -10 -10   4   33.27    3.31
 -10  10   4   35.66    4.03
 -10  10   4   39.98    3.59
  10  10  -3   14.45    2.59
  10 -10  -3   10.96    2.67
  10  10  -3    9.48    2.53
 -10 -10   3    9.06    2.07
 -10  10   3   12.91    3.16
 -10  10   3   12.68    2.54
  10  10  -2   33.51    3.73
  10 -10  -2   30.03    3.46
 -10 -10   2   31.58    3.14
 -10 -10   2   35.82    4.49
 -10  10   2   39.90    4.46
 -10  10   2   34.06    4.07
  10 -10  -1    6.53    1.84
  10 -10  -1    6.85    2.25
  10  10  -1    4.44    2.31
 -10 -10   1    6.43    1.67
 -10 -10   1    9.39    2.21
 -10  10   1    6.48    2.52
  10  10   0    3.83    1.78
  10 -10   0    1.87    2.50
 -10 -10   0    2.94    2.26
 -10 -10   0    3.50    1.39
 -10  10   0    4.61    2.28
  10  10   1   -0.73    2.33
  10 -10   1    7.49    2.66
 -10 -10  -1    4.32    2.33
 -10 -10  -1    5.81    1.63
 -10  10  -1    2.51    2.56
  10  10   2   16.72    3.22
  10 -10   2   16.67    3.30
 -10 -10  -2   11.48    3.07
 -10  10  -2    7.07    3.21
  10  10   3   18.36    3.32
  10 -10   3   16.59    3.73
 -10 -10  -3   11.25    3.18
 -10  10  -3   17.75    3.73
  10  10   4   15.19    3.00
  10 -10   4   16.20    3.78
 -10 -10  -4   18.87    3.30
 -10  10  -4   15.29    3.85
  10  10   5    0.73    1.98
  10 -10   5    6.61    2.82
 -10 -10  -5    3.60    2.17
 -10  10  -5    0.79    2.08
  10  10   6    1.60    2.58
  10 -10   6    5.08    2.42
 -10  10  -6    1.36    2.83
 -10 -10  -6    3.85    2.14
  10  10   7   -1.01    1.93
  10 -10   7    1.38    2.20
 -10  10  -7   -1.06    2.22
  10  10   8    4.20    2.85
  10 -10   8    8.61    3.59
 -10  10  -8    0.03    3.15
  10  10   9    3.82    2.29
  10 -10   9   -2.87    3.72
 -10  10  -9    5.64    3.18
  10 -10  10    4.03    3.14
 -10 -10 -10    0.84    2.61
 -10  10 -10    5.89    2.94
  10  12  -9    9.16    4.19
  10 -12  -9   10.04    4.26
 -10  12   9    9.31    4.05
  10  12  -8    0.11    2.08
  10 -12  -8    0.13    2.49
 -10  12   8   -1.68    2.25
  10  12  -7    0.40    2.20
  10 -12  -7    1.63    2.64
 -10  12   7    1.50    2.12
  10 -12  -6    3.56    2.53
  10  12  -6    1.96    3.00
 -10  12   6    0.73    2.67
  10  12  -5   12.53    3.78
 -10  12   5    9.57    3.79
  10  12  -4    1.22    2.32
 -10  12   4   -1.72    2.21
  10  12  -3   13.16    3.26
  10  12  -3   14.58    3.11
 -10  12   3    7.82    3.82
  10  12  -2    1.50    2.15
  10 -12  -2    0.63    2.63
 -10 -12   2    8.23    2.87
 -10  12   2    1.52    2.42
  10  12  -1    9.95    2.95
  10 -12  -1    6.13    3.30
 -10 -12   1   13.46    3.46
 -10  12   1    5.05    3.20
  10  12   0    4.47    2.41
  10 -12   0    0.17    2.18
 -10 -12   0    2.07    2.61
 -10  12   0    5.49    2.63
  10  12   1    5.45    2.55
  10 -12   1    1.71    2.87
 -10  12  -1    1.75    2.77
  10  12   2   -0.06    1.70
  10 -12   2    1.95    2.03
 -10 -12  -2    1.87    2.27
 -10  12  -2   -1.99    2.43
  10 -12   3   17.10    4.27
  10  12   3   15.92    3.89
 -10 -12  -3   12.66    3.74
 -10  12  -3   14.50    4.31
  10  12   4   -0.03    2.23
  10 -12   4    0.90    2.53
 -10  12  -4    1.12    2.71
  10  12   5    7.63    3.33
  10 -12   5    4.94    3.90
 -10  12  -5    6.94    3.89
  10  12   6    6.21    2.66
  10 -12   6    2.20    3.65
 -10  12  -6    2.44    3.68
  11   1 -18    8.66    4.06
  11  -1 -18   10.85    4.15
 -11  -1  18    9.06    3.86
 -11   1  18   12.07    3.86
  11   1 -17    0.92    3.05
  11  -1 -17    1.07    2.73
 -11  -1  17    6.67    2.88
 -11   1  17    4.38    2.70
  11   1 -16   -0.69    2.76
  11  -1 -16   10.02    2.44
 -11  -1  16   -0.99    2.44
 -11   1  16    1.81    2.42
  11   1 -15    1.25    1.42
  11  -1 -15   -1.48    1.89
 -11  -1  15    0.11    1.16
 -11  -1  15   -0.08    1.58
 -11   1  15   -0.33    1.54
  11   1 -14    7.52    2.98
  11  -1 -14    4.78    2.99
 -11  -1  14    6.59    2.03
 -11  -1  14    6.57    2.12
 -11   1  14   10.17    2.41
  11   1 -13   -0.14    2.11
  11  -1 -13   -1.17    2.07
 -11  -1  13   -0.44    1.73
 -11  -1  13    1.46    1.47
 -11   1  13    2.34    1.04
 -11   1  13    2.34    1.69
  11   1 -12   37.51    4.50
  11  -1 -12   35.78    4.11
 -11  -1  12   38.36    3.48
 -11  -1  12   43.10    3.77
 -11   1  12   45.35    2.95
 -11   1  12   42.54    3.78
  11   1 -11    8.90    2.29
  11  -1 -11   13.15    2.89
 -11  -1  11    8.39    2.04
 -11  -1  11   12.39    1.96
 -11   1  11    6.82    1.53
 -11   1  11    6.77    1.96
  11   1 -10    8.27    2.53
  11  -1 -10    7.71    2.65
 -11  -1  10    5.66    1.88
 -11  -1  10    6.81    1.68
 -11   1  10    6.08    1.60
 -11   1  10    9.20    1.71
  11   1  -9    0.79    1.81
 -11  -1   9   -1.11    1.35
 -11  -1   9    4.04    1.09
 -11   1   9   -0.14    1.12
 -11   1   9    1.28    1.15
  11   1  -8   11.14    1.84
  11  -1  -8    4.84    2.25
 -11  -1   8    5.97    1.65
 -11  -1   8    4.53    1.03
 -11   1   8    4.07    1.51
 -11   1   8    4.68    1.12
  11   1  -7    7.83    1.79
  11  -1  -7    8.17    1.81
 -11  -1   7    6.95    1.72
 -11  -1   7    4.88    0.96
 -11   1   7    7.18    1.73
 -11   1   7    6.19    1.15
  11   1  -6   39.68    3.33
  11  -1  -6   46.28    3.54
 -11  -1   6   46.52    3.40
 -11  -1   6   47.63    2.08
 -11   1   6   45.10    3.19
 -11   1   6   44.41    2.29
  11   1  -5   36.63    3.24
  11  -1  -5   37.39    3.28
 -11  -1   5   33.42    2.88
 -11  -1   5   31.15    1.37
 -11   1   5   36.91    2.86
 -11   1   5   31.75    1.71
  11   1  -4   33.78    2.97
  11  -1  -4   33.22    3.10
 -11  -1   4   28.84    2.81
 -11  -1   4   29.19    1.00
 -11   1   4   36.84    2.94
 -11   1   4   32.98    1.62
  11   1  -3    2.20    1.14
  11  -1  -3    3.78    1.49
 -11  -1   3    1.03    1.39
 -11   1   3    2.37    1.07
 -11   1   3    2.49    0.55
  11   1  -2   19.52    2.30
  11  -1  -2   20.71    2.38
 -11  -1   2   21.19    2.48
 -11   1   2   20.03    2.01
  11   1  -1   -0.26    0.87
  11  -1  -1    0.14    0.38
 -11  -1   1    2.29    0.93
 -11   1   1    0.23    0.83
  11   1   0   34.26    2.61
  11  -1   0   31.70    1.44
  11  -1   0   28.25    2.40
 -11  -1   0   30.60    2.88
 -11   1   0   34.15    3.05
  11   1   1    5.60    1.69
  11  -1   1    8.07    0.92
  11  -1   1   10.41    1.75
 -11  -1  -1    6.35    1.88
 -11   1  -1   11.22    2.00
  11   1   2   55.78    3.81
  11  -1   2   58.14    2.52
  11  -1   2   59.35    3.63
 -11  -1  -2   60.45    3.69
 -11   1  -2   56.44    3.62
  11   1   3    1.69    0.69
  11   1   3    4.55    1.28
  11  -1   3    3.14    1.04
  11  -1   3    4.76    1.38
 -11  -1  -3    6.30    1.34
 -11   1  -3    4.11    1.40
  11   1   4   20.46    1.54
  11   1   4   23.96    2.56
  11  -1   4   21.84    1.85
  11  -1   4   22.57    2.35
 -11  -1  -4   22.30    2.93
 -11   1  -4   23.81    2.78
  11   1   5    6.81    1.21
  11   1   5    8.14    1.76
  11  -1   5    6.39    1.57
  11  -1   5    6.17    1.60
 -11  -1  -5    6.56    1.89
 -11   1  -5    5.23    1.62
  11   1   6    6.59    1.47
  11   1   6    6.29    1.94
  11  -1   6    4.70    1.64
  11  -1   6    8.97    1.71
 -11  -1  -6    9.39    2.07
 -11   1  -6    9.25    1.84
  11   1   7   22.30    2.45
  11   1   7   23.18    2.65
  11  -1   7   23.32    2.76
  11  -1   7   19.68    2.41
 -11  -1  -7   20.01    2.92
 -11   1  -7   21.14    3.02
  11   1   8   20.69    2.79
  11   1   8   16.92    2.67
  11  -1   8   16.76    2.72
  11  -1   8   17.11    2.45
 -11  -1  -8   16.91    2.78
 -11   1  -8   21.13    2.95
  11   1   9    5.23    2.26
  11   1   9    6.90    2.08
  11  -1   9    4.80    2.14
  11  -1   9    5.43    1.86
 -11  -1  -9    5.25    2.01
 -11   1  -9    4.36    1.80
  11   1  10   14.14    2.93
  11   1  10    6.34    2.05
  11  -1  10    4.33    2.46
  11  -1  10    8.14    2.03
 -11  -1 -10    2.52    2.13
 -11   1 -10    5.76    2.45
  11   1  11    1.02    1.84
  11   1  11   -0.98    2.24
  11  -1  11    1.63    2.23
  11  -1  11    0.67    1.73
 -11  -1 -11    5.38    1.62
 -11   1 -11    3.79    2.09
  11   1  12   -0.26    1.90
  11   1  12    2.95    2.18
  11  -1  12   -1.15    2.20
  11  -1  12    0.38    1.47
 -11  -1 -12    4.02    1.86
 -11   1 -12   -0.49    1.98
  11   1  13    0.05    1.26
  11   1  13   -0.27    1.78
  11  -1  13   -1.12    1.97
 -11  -1 -13   -0.87    1.48
 -11   1 -13    1.75    1.64
  11   1  14    0.72    2.63
  11  -1  14    2.17    2.92
 -11  -1 -14    0.26    2.31
 -11  -1 -14    0.67    2.42
 -11   1 -14    5.59    2.46
  11   1  15    2.90    3.15
  11  -1  15   14.36    3.69
 -11  -1 -15    1.02    2.94
 -11   1 -15   -0.40    2.94
  11  -3 -18    3.85    3.98
  11   3 -18   13.52    3.30
 -11   3  18    1.87    3.48
 -11  -3  18    0.55    3.30
  11   3 -17    6.11    3.27
  11  -3 -17   10.20    3.88
 -11   3  17    6.66    3.45
 -11  -3  17    5.13    3.21
  11  -3 -16   -1.88    2.42
  11   3 -16    1.04    1.64
 -11   3  16    0.20    1.73
 -11  -3  16   -1.16    1.69
  11  -3 -15   -0.64    2.24
  11   3 -15    1.30    1.97
 -11   3  15    2.21    1.93
 -11  -3  15   -1.51    1.74
  11  -3 -14    0.15    2.27
  11   3 -14   -0.22    1.88
 -11   3  14   -0.14    1.77
 -11  -3  14   -1.84    1.67
  11  -3 -13   16.32    3.36
  11   3 -13   17.79    3.48
 -11   3  13   24.92    3.25
 -11  -3  13   18.84    2.96
 -11  -3  13   12.80    2.96
  11  -3 -12    1.27    2.60
  11   3 -12    3.05    2.17
 -11  -3  12    0.74    1.98
 -11   3  12    2.96    1.79
 -11  -3  12    5.76    1.84
  11  -3 -11   49.36    5.04
  11   3 -11   45.65    4.36
 -11   3  11   36.60    2.52
 -11   3  11   44.13    3.74
 -11  -3  11   48.99    3.96
 -11  -3  11   45.36    4.00
  11  -3 -10   23.04    3.87
  11   3 -10   22.15    3.23
 -11   3  10   23.80    1.93
 -11  -3  10   25.40    2.81
 -11  -3  10   25.80    3.10
 -11   3  10   19.79    2.72
  11  -3  -9   -1.36    1.47
  11   3  -9   -1.31    1.56
 -11   3   9    1.46    1.16
 -11   3   9    0.11    0.80
 -11  -3   9    1.21    1.10
 -11  -3   9    3.26    1.42
  11  -3  -8    6.99    2.08
  11   3  -8    7.97    2.17
 -11   3   8    6.05    1.24
 -11   3   8    6.54    1.58
 -11  -3   8    6.17    1.25
 -11  -3   8    4.09    1.60
  11  -3  -7    3.54    1.97
  11   3  -7    3.61    1.72
 -11   3   7    1.65    1.14
 -11   3   7    2.65    1.14
 -11  -3   7    1.39    0.79
 -11  -3   7    0.57    1.54
  11  -3  -6    7.42    1.86
  11   3  -6    7.01    1.92
 -11   3   6    4.61    1.27
 -11   3   6    9.72    1.65
 -11  -3   6    6.39    1.86
 -11  -3   6    4.54    0.73
  11  -3  -5   46.05    3.50
  11   3  -5   48.44    3.71
 -11   3   5   49.31    3.36
 -11  -3   5   44.12    3.41
 -11  -3   5   41.90    1.61
 -11   3   5   40.99    2.50
  11   3  -4    6.19    1.51
  11  -3  -4    7.13    2.02
 -11   3   4    5.92    1.64
 -11   3   4    6.92    1.06
 -11  -3   4   10.78    2.01
  11   3  -3   12.37    1.70
  11  -3  -3    8.91    1.97
 -11   3   3    8.75    1.21
 -11   3   3    6.69    1.74
 -11  -3   3    6.09    1.96
  11  -3  -2    2.98    1.20
  11   3  -2    1.47    0.96
 -11   3   2    0.08    0.93
 -11   3   2    0.06    0.60
 -11  -3   2   -0.66    0.99
  11  -3  -1   -0.12    0.50
  11  -3  -1   -0.85    0.94
  11   3  -1    0.94    0.94
 -11   3   1    0.10    0.97
  11   3   0    4.20    1.32
  11  -3   0    4.83    0.88
  11  -3   0    3.28    1.38
 -11   3   0    2.50    1.24
 -11  -3   0    3.19    1.41
  11  -3   1    0.80    0.77
  11  -3   1    1.20    1.10
  11   3   1    1.51    1.18
 -11   3  -1   -0.97    1.28
 -11  -3  -1    1.83    1.38
  11  -3   2    2.03    0.97
  11  -3   2   -0.61    1.15
  11   3   2    0.66    1.14
 -11  -3  -2    3.41    1.45
  11  -3   3   44.22    3.08
  11  -3   3   45.86    2.89
  11   3   3   41.81    3.35
 -11   3  -3   43.96    3.79
 -11  -3  -3   48.77    3.88
  11  -3   4    7.16    1.73
  11  -3   4    6.01    1.26
  11   3   4    5.00    1.92
  11   3   4    7.15    0.85
 -11   3  -4    3.79    1.95
 -11  -3  -4    9.24    1.68
  11  -3   5   15.73    2.41
  11  -3   5   11.99    1.63
  11   3   5   18.50    2.48
  11   3   5   14.15    1.24
 -11  -3  -5   13.37    2.38
 -11   3  -5   14.66    2.17
  11  -3   6    2.66    1.79
  11  -3   6    5.87    1.33
  11   3   6    6.20    1.80
  11   3   6    1.79    0.92
 -11   3  -6    6.46    1.95
 -11  -3  -6    4.71    1.90
  11  -3   7    0.83    1.80
  11  -3   7    0.72    1.18
  11   3   7    0.75    1.71
  11   3   7    4.45    1.03
 -11   3  -7    2.15    1.96
 -11  -3  -7    2.87    1.33
  11  -3   8    0.95    1.20
  11  -3   8   -1.22    1.70
  11   3   8   -0.27    1.80
  11   3   8    3.28    1.07
 -11   3  -8   -0.01    1.43
 -11  -3  -8    3.55    1.56
  11   3   9    9.66    2.38
  11  -3   9    7.04    1.77
  11   3   9    7.55    1.95
  11  -3   9    5.31    2.57
 -11   3  -9   10.26    2.50
 -11  -3  -9    3.51    2.10
  11  -3  10    7.11    2.10
  11   3  10    3.13    1.83
  11   3  10    3.38    2.01
  11  -3  10    5.07    1.55
 -11   3 -10    1.59    2.29
 -11  -3 -10    2.43    1.91
  11  -3  11    0.11    1.27
  11  -3  11   -2.44    2.64
  11   3  11    5.24    2.18
  11   3  11    7.79    2.14
 -11   3 -11    0.59    2.26
 -11  -3 -11    2.61    1.93
  11  -3  12   -0.54    2.82
  11   3  12    0.41    1.89
  11   3  12    7.71    2.39
 -11   3 -12   -0.57    2.42
 -11  -3 -12    2.94    1.92
  11  -3  13    3.83    2.71
  11   3  13   -0.65    1.83
  11   3  13    1.35    2.34
 -11   3 -13    0.60    2.37
 -11  -3 -13    1.58    1.88
  11  -3  14    0.12    3.22
  11   3  14   11.59    3.17
 -11   3 -14    0.98    2.43
 -11  -3 -14    1.41    2.70
  11  -3  15    2.38    3.80
 -11   3 -15    7.61    3.43
  11   5 -17    9.82    3.20
  11  -5 -17    6.75    3.68
 -11  -5  17    4.44    3.84
 -11   5  17    3.63    3.47
  11   5 -16    0.53    1.26
  11  -5 -16   -0.58    1.66
 -11  -5  16   -2.73    1.87
 -11   5  16    2.20    1.85
  11   5 -15    2.57    2.19
  11   5 -15    1.24    2.40
  11  -5 -15   -0.68    2.20
 -11  -5  15    6.65    2.61
 -11   5  15    0.97    2.00
  11   5 -14   -1.40    1.87
  11  -5 -14   -0.90    1.71
  11   5 -14    0.79    1.84
 -11  -5  14    0.13    1.99
 -11   5  14   -1.46    1.99
  11   5 -13    6.55    2.59
  11   5 -13    5.11    2.51
  11  -5 -13    4.58    3.01
 -11  -5  13    6.02    2.31
 -11   5  13    7.18    2.65
  11   5 -12    4.48    2.00
  11  -5 -12    1.32    1.99
  11   5 -12    1.99    2.06
 -11  -5  12    3.75    1.97
 -11   5  12    1.89    2.15
  11   5 -11   55.23    4.95
  11   5 -11   56.74    4.66
  11  -5 -11   58.17    5.67
 -11  -5  11   57.76    4.52
 -11   5  11   54.93    4.86
  11   5 -10    4.87    1.97
  11  -5 -10    1.26    2.42
  11   5 -10    4.67    2.26
 -11  -5  10    6.98    1.66
 -11   5  10    7.95    2.16
  11   5  -9   15.91    2.85
  11   5  -9   23.96    2.89
  11  -5  -9   17.84    3.07
 -11  -5   9   19.41    2.11
 -11   5   9   17.17    2.68
 -11   5   9   16.97    1.69
  11   5  -8    1.16    1.58
  11   5  -8   -0.78    1.01
  11  -5  -8    0.39    2.24
 -11  -5   8    3.16    1.08
 -11   5   8    3.81    1.01
 -11   5   8    2.04    1.24
  11   5  -7   13.74    2.46
  11  -5  -7   17.13    3.34
 -11  -5   7   15.65    1.63
 -11  -5   7   14.10    2.73
 -11   5   7   16.83    2.08
 -11   5   7   16.06    1.78
  11  -5  -6   19.48    2.88
  11   5  -6   11.51    2.26
 -11  -5   6   11.02    1.33
 -11  -5   6    6.59    2.48
 -11   5   6   12.00    1.96
 -11   5   6   11.96    1.81
  11  -5  -5   82.75    5.73
  11   5  -5   83.95    5.16
 -11  -5   5   80.80    3.31
 -11  -5   5   85.11    5.44
 -11   5   5   84.49    4.69
 -11   5   5   89.88    4.62
  11   5  -4    8.90    1.69
  11  -5  -4    6.91    1.91
 -11  -5   4    9.35    2.20
 -11   5   4    7.72    1.79
 -11   5   4    7.96    1.53
  11   5  -3   48.04    3.82
  11  -5  -3   43.43    3.70
 -11  -5   3   51.23    3.82
 -11   5   3   45.34    3.48
 -11   5   3   46.59    3.13
  11   5  -2    0.75    1.35
  11  -5  -2    2.18    1.36
 -11  -5   2   -0.95    1.20
 -11   5   2    2.12    1.13
 -11   5   2    0.49    1.29
  11   5  -1    0.63    1.11
  11  -5  -1    2.04    1.39
 -11  -5   1    1.88    1.67
 -11   5   1    3.32    1.44
  11   5   0    2.26    1.40
  11  -5   0    0.17    1.10
  11  -5   0   -0.68    1.13
 -11  -5   0   -0.36    1.44
 -11   5   0    2.65    1.32
  11   5   1   40.14    3.65
  11  -5   1   42.61    2.86
  11  -5   1   39.70    3.17
 -11  -5  -1   39.66    3.66
 -11   5  -1   39.24    3.29
  11  -5   2    5.37    1.25
  11   5   2    5.97    2.03
  11  -5   2    7.91    1.78
 -11  -5  -2    9.43    2.19
 -11   5  -2    3.79    1.67
  11   5   3   40.09    3.38
  11  -5   3   41.17    3.53
  11  -5   3   40.58    2.83
 -11  -5  -3   36.73    3.80
 -11   5  -3   42.57    3.99
  11   5   4   -0.10    1.64
  11   5   4    1.84    0.70
  11  -5   4    5.58    1.72
  11  -5   4    1.98    0.94
 -11   5  -4   -0.81    1.71
 -11  -5  -4    4.28    1.63
  11  -5   5    8.38    1.19
  11  -5   5    7.76    2.33
  11   5   5    7.13    1.84
  11   5   5    5.60    0.97
 -11  -5  -5    9.39    2.07
 -11   5  -5    4.38    2.20
  11   5   6   -0.33    1.64
  11   5   6    2.47    0.84
  11  -5   6    1.13    1.80
  11  -5   6    0.85    0.84
 -11   5  -6   -0.34    1.82
 -11  -5  -6    1.05    1.52
  11  -5   7    4.73    2.29
  11  -5   7    5.37    1.06
  11   5   7    4.15    1.80
  11   5   7    3.60    1.16
 -11   5  -7    4.21    2.21
 -11  -5  -7    6.88    1.90
  11  -5   8    0.94    2.03
  11   5   8    3.42    1.80
  11   5   8    0.12    1.16
 -11   5  -8    1.47    1.87
 -11  -5  -8   -0.40    1.74
  11  -5   9    8.29    3.18
  11   5   9   14.24    2.98
  11   5   9    8.34    2.06
 -11   5  -9   10.21    2.62
 -11  -5  -9    8.44    2.32
  11   5  10    5.35    1.68
  11   5  10   -1.40    1.33
 -11  -5 -10   -0.66    1.16
 -11   5 -10   -0.70    1.45
  11  -5  11    1.27    2.39
  11   5  11    0.72    2.02
  11   5  11    2.91    1.69
 -11   5 -11   -0.99    2.25
 -11  -5 -11   -0.43    1.37
  11  -5  12    0.95    2.66
  11   5  12    0.65    2.29
  11   5  12    0.18    1.99
 -11   5 -12    1.76    2.49
  11  -5  13    3.13    2.91
 -11   5 -13   -0.41    2.60
  11  -5  14    5.19    4.43
 -11  -5 -14    4.02    3.65
 -11   5 -14   12.25    3.73
  11   7 -16    3.11    2.13
  11  -7 -16   -1.79    1.86
 -11   7  16   -0.79    2.08
  11   7 -15    3.17    2.50
  11  -7 -15    4.61    2.78
 -11  -7  15    5.61    3.13
 -11   7  15    1.63    3.19
  11   7 -14    5.24    2.63
  11  -7 -14   10.58    2.88
 -11  -7  14    3.67    2.98
 -11   7  14    5.36    3.35
  11   7 -13    6.58    2.63
  11  -7 -13    8.63    3.35
 -11  -7  13    6.20    2.66
 -11   7  13    6.51    3.04
  11   7 -12   15.60    3.05
  11   7 -12   14.02    3.93
  11  -7 -12   16.46    4.02
 -11  -7  12   19.78    3.25
 -11   7  12   15.58    3.76
  11   7 -11    4.93    2.09
  11   7 -11    5.88    2.61
  11  -7 -11    3.68    2.83
 -11  -7  11    6.60    2.46
 -11   7  11    4.98    2.55
  11   7 -10    9.94    2.87
  11   7 -10    6.15    2.22
  11  -7 -10    6.16    2.29
 -11  -7  10    4.50    2.25
 -11   7  10    4.65    2.18
  11   7  -9    3.60    2.02
  11   7  -9    1.54    1.66
  11  -7  -9    1.02    2.16
 -11  -7   9   -0.44    1.36
 -11   7   9    4.09    1.77
  11   7  -8    1.38    2.16
  11   7  -8    5.06    1.63
  11  -7  -8    2.83    2.26
 -11   7   8    3.15    2.01
  11   7  -7    2.77    1.70
  11   7  -7    1.74    1.35
  11  -7  -7    0.16    1.77
 -11  -7   7   -0.65    0.91
 -11   7   7    0.98    0.92
 -11   7   7   -0.05    1.27
  11   7  -6    7.91    1.96
  11   7  -6    8.39    2.19
  11  -7  -6    4.40    2.58
 -11  -7   6    6.48    1.35
 -11   7   6    7.00    1.49
 -11   7   6    7.39    2.11
  11   7  -5   19.45    2.63
  11  -7  -5   21.64    3.04
 -11  -7   5   16.11    1.64
 -11  -7   5   19.72    2.81
 -11   7   5   21.87    2.45
 -11   7   5   20.54    2.79
  11   7  -4   43.05    3.59
  11  -7  -4   45.30    4.05
 -11  -7   4   37.87    2.29
 -11  -7   4   43.79    4.31
 -11   7   4   44.00    3.63
 -11   7   4   43.93    3.51
  11   7  -3    7.17    2.20
  11  -7  -3    4.91    2.29
 -11  -7   3    7.28    2.51
 -11   7   3   10.26    2.04
 -11   7   3    9.05    2.09
  11   7  -2    6.70    2.07
  11  -7  -2    6.85    1.89
 -11  -7   2    5.70    1.87
 -11   7   2   11.45    2.01
 -11   7   2    7.19    1.97
  11   7  -1    1.64    1.58
  11  -7  -1    1.38    1.26
 -11  -7   1   -0.96    1.36
 -11   7   1    1.51    1.52
  11   7   0    7.40    2.29
  11  -7   0   10.36    2.17
  11  -7   0    7.81    1.81
 -11  -7   0   10.62    2.42
 -11   7   0    7.49    2.35
  11   7   1   12.91    2.27
  11  -7   1    5.32    1.32
  11  -7   1    4.18    2.12
 -11  -7  -1    9.57    2.28
 -11   7  -1    8.47    2.34
  11   7   2   37.19    3.71
  11  -7   2   34.74    3.71
  11  -7   2   31.50    2.55
 -11  -7  -2   34.37    3.75
 -11   7  -2   34.31    3.79
  11   7   3    5.01    2.23
  11  -7   3    6.48    1.16
  11  -7   3    4.95    2.14
 -11  -7  -3    6.86    2.16
 -11   7  -3    6.75    2.11
  11   7   4   16.69    3.14
  11  -7   4   18.19    3.24
 -11  -7  -4   17.47    2.90
 -11   7  -4   14.96    3.28
  11   7   5    9.19    2.36
  11   7   5    3.09    1.28
  11  -7   5    4.71    2.32
 -11  -7  -5    3.90    2.13
 -11   7  -5    4.59    2.37
  11   7   6   -1.28    2.01
  11   7   6    0.65    0.97
  11  -7   6   -0.45    2.11
 -11  -7  -6    5.45    1.82
 -11   7  -6    4.33    1.77
  11   7   7   -0.46    1.91
  11  -7   7    6.57    2.38
 -11   7  -7    0.48    2.17
  11   7   8    4.87    2.49
  11  -7   8    6.52    2.49
 -11  -7  -8    4.20    2.07
 -11   7  -8    5.33    2.85
  11   7   9   -0.38    1.83
  11  -7   9   -0.24    2.67
 -11  -7  -9    5.92    1.84
 -11   7  -9   -0.94    1.95
  11   7  10   -0.52    2.17
  11  -7  10    1.61    2.65
 -11   7 -10    2.20    2.50
  11   7  11    0.72    2.47
  11  -7  11    2.17    3.03
  11   7  12    2.26    1.43
  11  -7  12   -1.67    3.11
 -11   7 -12   -1.66    2.68
  11  -9 -14    1.29    3.36
 -11   9  14    1.69    2.94
  11   9 -13    0.67    1.85
  11  -9 -13   -1.82    2.62
 -11   9  13    0.95    2.24
  11   9 -12   15.02    3.48
  11  -9 -12   12.36    4.38
 -11   9  12   12.17    3.21
  11   9 -11    5.07    2.75
  11  -9 -11    5.08    2.76
 -11   9  11   -1.62    2.05
  11   9 -10    7.77    2.79
  11  -9 -10   10.38    3.62
 -11  -9  10    6.98    2.75
 -11   9  10   11.80    2.78
  11   9  -9    0.97    1.57
  11   9  -9    1.66    1.94
  11  -9  -9    0.19    2.21
 -11   9   9    1.83    2.17
  11   9  -8    2.64    1.90
  11   9  -8    0.60    1.71
  11  -9  -8    2.85    2.32
 -11  -9   8   -0.13    1.46
 -11   9   8    3.65    2.17
  11   9  -7    1.90    1.77
  11  -9  -7    0.36    2.31
 -11  -9   7    0.88    1.57
 -11   9   7    3.09    2.17
  11   9  -6   22.45    3.68
  11   9  -6   26.44    3.29
  11  -9  -6   20.54    4.02
 -11  -9   6   20.80    2.52
 -11   9   6   20.75    2.67
 -11   9   6   28.53    3.78
  11   9  -5    5.51    2.18
  11   9  -5    5.21    2.18
  11  -9  -5    3.43    2.51
 -11  -9   5    6.95    1.50
 -11   9   5    3.37    1.91
 -11   9   5    5.29    2.41
  11   9  -4   32.80    3.75
  11  -9  -4   27.04    3.86
 -11  -9   4   32.09    3.74
 -11   9   4   31.77    3.56
 -11   9   4   31.67    4.00
  11   9  -3    7.36    2.38
  11  -9  -3    6.66    2.26
 -11  -9   3    9.35    2.31
 -11   9   3    5.96    2.13
 -11   9   3    9.42    2.62
  11   9  -2    6.02    2.25
  11  -9  -2    6.75    2.04
 -11  -9   2    5.40    2.64
 -11   9   2    5.55    2.26
 -11   9   2    8.44    2.53
  11   9  -1    4.34    1.84
  11  -9  -1    1.42    1.40
  11  -9  -1    0.00    1.88
 -11  -9   1    0.69    1.58
 -11   9   1    0.25    1.89
  11  -9   0   14.78    3.03
  11  -9   0   11.89    1.86
  11   9   0   16.09    2.86
 -11  -9   0   14.18    2.62
 -11   9   0    7.73    3.08
  11   9   1    2.37    1.81
  11  -9   1    2.25    1.91
 -11  -9  -1    0.89    1.58
 -11   9  -1   -1.47    2.03
  11   9   2   35.30    4.24
  11  -9   2   34.79    3.86
 -11  -9  -2   33.75    4.18
 -11   9  -2   34.09    4.76
  11   9   3    6.57    2.06
  11  -9   3   -1.19    1.58
 -11  -9  -3   -0.27    1.84
 -11   9  -3   -0.03    2.15
  11  -9   4   13.34    3.21
  11   9   4    7.02    2.48
 -11  -9  -4   10.13    2.83
 -11   9  -4   14.36    3.38
  11   9   5    5.81    2.53
  11  -9   5    5.29    2.30
 -11  -9  -5    5.86    2.39
 -11   9  -5    4.69    2.87
  11  -9   6   -0.76    1.63
 -11  -9  -6   -0.09    1.37
 -11   9  -6    2.03    2.05
  11   9   7    6.10    2.62
  11  -9   7    4.34    2.88
 -11  -9  -7    0.81    2.05
 -11   9  -7    1.94    2.80
  11   9   8    4.45    2.27
  11  -9   8    0.79    3.29
 -11   9  -8    4.32    3.08
  11   9   9   -1.94    2.69
  11  -9   9    8.22    2.77
 -11   9  -9    0.42    2.27
  11   9  10    1.85    3.01
  11  -9  10    8.08    3.95
 -11   9 -10    3.63    3.46
  11  11 -10    1.08    2.58
  11 -11 -10   -1.34    3.12
 -11  11  10    7.02    3.05
  11  11  -9    5.95    3.01
  11 -11  -9    3.43    3.48
 -11  11   9   11.83    3.63
  11  11  -8   -1.97    2.19
 -11  11   8    1.54    2.09
  11  11  -7    5.93    2.82
  11 -11  -7    0.77    3.06
  11  11  -6    5.90    2.76
  11 -11  -6   11.16    3.56
 -11  11   6    9.11    3.40
  11  11  -5   23.97    4.41
  11  11  -5   24.30    3.41
  11 -11  -5   15.92    3.95
 -11  11   5   17.52    4.19
  11  11  -4   13.78    2.93
  11 -11  -4   10.98    2.87
 -11  11   4    6.46    2.53
 -11  11   4   13.58    3.45
  11  11  -3    7.56    2.73
 -11 -11   3    5.76    3.15
 -11  11   3    6.99    2.68
 -11  11   3    7.67    2.76
  11  11  -2    6.02    2.37
  11 -11  -2   -0.44    2.60
 -11 -11   2    4.23    2.83
 -11  11   2    2.95    2.42
  11  11  -1    0.77    2.22
  11 -11  -1    1.14    2.46
 -11 -11   1    6.70    2.55
 -11  11   1   -0.40    2.41
  11  11   0    2.31    2.56
  11 -11   0    2.14    2.79
 -11 -11   0    6.39    2.76
 -11  11   0    5.81    2.25
  11  11   1   11.41    3.39
  11 -11   1   12.82    3.18
 -11 -11  -1   11.02    3.60
 -11  11  -1   13.24    3.58
  11  11   2    1.78    2.87
  11 -11   2    9.68    3.31
 -11 -11  -2   10.03    3.04
 -11  11  -2    6.31    2.76
  11  11   3    5.83    3.15
  11 -11   3   10.90    3.25
 -11 -11  -3   15.43    3.32
 -11  11  -3    9.09    3.65
  11  11   4   -1.79    2.45
  11 -11   4    2.76    2.58
 -11 -11  -4    3.20    2.26
 -11  11  -4    1.09    2.61
  11  11   5    6.22    2.81
  11 -11   5   -1.69    3.06
 -11  11  -5    1.39    2.86
  11  11   6    1.44    2.42
  11 -11   6    0.53    2.97
 -11  11  -6    0.71    2.36
  11  11   7    5.96    2.76
  11 -11   7   -0.39    2.53
 -11  11  -7   -1.12    3.10
  11 -13  -2   -0.22    2.76
 -11 -13   2   -1.35    2.72
  11 -13  -1   11.85    3.67
 -11 -13   1    0.30    3.45
  12   0 -18    1.61    3.48
 -12   0  18    3.97    2.43
  12   0 -17   -2.46    2.80
 -12   0  17   -1.03    2.60
  12   0 -16   -1.75    2.45
 -12   0  16    0.00    2.03
  12   0 -15    4.49    2.55
 -12   0  15   -0.66    1.97
  12   0 -14    4.63    2.61
 -12   0  14    0.96    1.42
 -12   0  14    4.84    2.06
  12   0 -13    4.76    2.02
 -12   0  13    0.06    1.23
 -12   0  13   -1.06    1.51
  12   0 -12   63.53    5.82
 -12   0  12   63.62    4.27
 -12   0  12   56.08    4.28
  12   0 -11   -1.43    1.50
 -12   0  11    0.09    1.21
 -12   0  11   -0.50    1.14
  12   0 -10   92.90    6.56
 -12   0  10   87.77    5.10
 -12   0  10   88.41    4.65
 -12   0   9    0.83    1.16
 -12   0   9    0.26    0.93
  12   0  -8    5.33    2.34
 -12   0   8    9.09    1.90
 -12   0   8    5.72    1.07
  12   0  -7    2.57    1.69
 -12   0   7    0.60    1.10
 -12   0   7    0.67    0.64
  12   0  -6  296.50   11.83
 -12   0   6  300.76   11.05
 -12   0   6  292.65    7.45
  12   0  -5    1.37    1.35
 -12   0   5    1.09    1.20
 -12   0   5    0.24    0.37
  12   0  -4  126.79    6.58
 -12   0   4  118.98    5.82
 -12   0   4  111.87    2.95
  12   0  -3   -0.11    1.15
 -12   0   3    3.41    0.97
 -12   0   3    0.06    0.23
  12   0  -2    5.01    1.72
 -12   0   2    4.45    1.75
  12   0  -1    1.77    1.16
 -12   0   1   -0.41    1.02
  12   0   0   56.98    3.97
 -12   0   0   51.91    3.58
  12   0   1    0.07    0.40
  12   0   1    1.38    1.09
  12   0   2   40.53    2.09
  12   0   2   38.50    3.42
 -12   0  -2   48.33    3.90
  12   0   3   -0.26    0.78
  12   0   3    0.44    1.14
 -12   0  -3    2.44    1.14
  12   0   4    1.92    0.97
  12   0   4    5.54    1.60
 -12   0  -4    3.92    1.75
  12   0   5    0.69    0.95
  12   0   5   -0.21    0.99
 -12   0  -5    2.48    1.39
  12   0   6    4.94    1.46
  12   0   6    3.59    1.45
 -12   0  -6    6.26    1.66
  12   0   7   -0.96    1.38
  12   0   7    0.79    1.40
 -12   0  -7    5.17    1.66
  12   0   8    8.46    2.18
  12   0   8    3.98    1.95
 -12   0  -8    7.32    1.88
  12   0   9    0.88    1.29
  12   0   9    0.17    1.32
 -12   0  -9   -0.87    1.42
  12   0  10    1.06    1.92
  12   0  10    1.78    1.61
 -12   0 -10   -0.29    1.77
  12   0  11    1.86    2.47
  12   0  11    4.24    2.06
 -12   0 -11    3.27    2.40
  12   0  12   -0.51    2.14
  12   0  12    0.34    1.77
 -12   0 -12    1.90    2.01
  12   0  13    2.69    2.02
  12   0  13   -0.73    1.52
 -12   0 -13   -0.83    1.64
 -12   0 -14    3.03    2.39
 -12   0 -14    0.40    2.46
  12   2 -18   -1.04    2.34
  12  -2 -18    0.21    2.56
 -12  -2  18    0.36    2.36
  12   2 -17    0.63    2.37
  12  -2 -17    1.29    2.61
 -12  -2  17    0.04    2.32
 -12   2  17    0.27    2.29
  12   2 -16    0.82    2.02
  12  -2 -16    0.04    2.77
 -12  -2  16    4.61    1.98
 -12   2  16   -0.71    2.36
  12   2 -15    2.00    3.03
  12  -2 -15    8.77    3.16
 -12  -2  15    7.54    2.41
 -12  -2  15    5.79    2.57
 -12   2  15    7.04    2.80
  12   2 -14    3.93    2.68
  12  -2 -14    3.68    2.43
 -12  -2  14    4.28    2.08
 -12  -2  14    4.94    2.28
 -12   2  14    4.82    2.33
  12   2 -13    9.02    2.94
  12  -2 -13    9.15    3.32
 -12  -2  13   12.13    2.55
 -12  -2  13    9.64    2.21
 -12   2  13   12.22    2.68
  12   2 -12   18.05    3.63
  12  -2 -12   22.46    4.09
 -12  -2  12   21.87    3.04
 -12  -2  12   23.53    2.68
 -12   2  12   20.34    2.30
 -12   2  12   26.00    3.12
  12   2 -11    5.33    2.60
  12  -2 -11   12.85    2.89
 -12  -2  11    8.44    2.10
 -12  -2  11    8.01    1.79
 -12   2  11    7.08    1.60
 -12   2  11    6.33    1.90
  12   2 -10    1.51    1.36
  12  -2 -10    0.08    1.55
 -12  -2  10   -0.58    1.11
 -12  -2  10    0.39    1.05
 -12   2  10    1.89    1.05
 -12   2  10    0.42    1.16
  12   2  -9   10.53    2.63
  12  -2  -9   10.21    2.82
 -12  -2   9    9.63    2.23
 -12  -2   9    9.55    1.36
 -12   2   9    9.79    1.85
 -12   2   9    8.78    1.80
  12   2  -8   27.64    3.51
  12  -2  -8   26.19    3.76
 -12  -2   8   30.48    3.24
 -12  -2   8   29.59    1.96
 -12   2   8   32.53    2.83
 -12   2   8   29.33    2.46
  12   2  -7   25.32    3.11
  12  -2  -7   18.22    2.72
 -12  -2   7   28.43    2.85
 -12  -2   7   20.09    1.36
 -12   2   7   21.36    2.47
 -12   2   7   26.54    2.15
  12   2  -6   38.19    3.71
  12  -2  -6   40.16    3.92
 -12  -2   6   40.80    3.24
 -12  -2   6   36.52    1.62
 -12   2   6   43.64    3.29
 -12   2   6   37.89    2.39
  12   2  -5   30.24    3.03
  12  -2  -5   34.08    3.20
 -12  -2   5   31.89    2.94
 -12   2   5   33.98    3.04
 -12   2   5   37.88    2.05
  12   2  -4   19.76    2.79
  12  -2  -4   21.47    2.77
 -12  -2   4   23.88    2.79
 -12   2   4   20.08    1.45
 -12   2   4   17.62    2.44
  12   2  -3    1.64    1.32
  12  -2  -3    1.83    1.37
 -12  -2   3    0.04    1.36
 -12   2   3    0.68    0.52
 -12   2   3   -0.63    1.28
  12   2  -2    1.13    1.23
 -12  -2   2   -0.27    1.21
 -12   2   2    0.19    1.07
  12   2  -1    3.42    1.55
  12  -2  -1    2.81    0.65
  12  -2  -1    3.39    1.30
 -12  -2   1    1.52    1.71
 -12   2   1    2.67    1.57
  12   2   0   60.09    3.84
  12  -2   0   52.66    2.35
  12  -2   0   57.03    3.61
 -12  -2   0   60.83    4.00
 -12   2   0   54.79    4.10
  12   2   1   29.96    3.08
  12  -2   1   28.57    1.81
  12  -2   1   27.88    2.75
 -12  -2  -1   32.13    3.29
 -12   2  -1   31.63    2.86
  12   2   2   23.16    2.53
  12  -2   2   22.27    1.72
  12  -2   2   19.93    2.41
 -12  -2  -2   19.84    2.48
 -12   2  -2   20.10    2.44
  12   2   3   10.29    2.12
  12  -2   3    9.31    1.43
  12  -2   3    9.10    1.91
 -12  -2  -3   11.45    2.03
 -12   2  -3   11.02    2.24
  12   2   4    1.61    1.25
  12  -2   4    2.55    1.30
  12  -2   4    2.06    1.35
 -12  -2  -4    3.00    1.80
 -12   2  -4    4.81    1.73
  12   2   5    1.99    1.69
  12   2   5    2.97    0.90
  12  -2   5    1.94    1.31
  12  -2   5    3.31    1.39
 -12  -2  -5    5.96    1.99
 -12   2  -5    4.23    1.84
  12   2   6   -1.16    1.43
  12   2   6    0.29    0.75
  12  -2   6    0.18    1.14
  12  -2   6    0.08    1.02
 -12  -2  -6    1.48    1.47
 -12   2  -6    4.97    1.52
  12   2   7    0.97    1.26
  12   2   7   -0.23    0.91
  12  -2   7    1.80    1.43
  12  -2   7   -0.34    1.20
 -12  -2  -7    3.34    1.51
 -12   2  -7    1.59    1.34
  12   2   8    6.06    1.96
  12   2   8    4.93    1.78
  12  -2   8    8.68    2.36
  12  -2   8    9.47    1.95
 -12  -2  -8   10.45    2.31
 -12   2  -8    9.76    2.21
  12   2   9    5.30    2.09
  12   2   9    5.10    1.67
  12  -2   9   -0.05    1.91
  12  -2   9    0.54    1.65
 -12  -2  -9    0.68    1.94
 -12   2  -9    3.23    2.05
  12   2  10    2.17    1.99
  12  -2  10    1.12    2.16
  12  -2  10   -0.33    1.59
 -12  -2 -10    1.56    1.92
 -12   2 -10    5.05    2.12
  12   2  11    2.11    2.07
  12   2  11    1.71    2.06
  12  -2  11    0.94    2.35
  12  -2  11    0.89    1.64
 -12  -2 -11    5.96    2.06
 -12   2 -11   -1.64    2.18
  12   2  12   -1.17    2.11
  12   2  12    4.94    2.32
  12  -2  12    0.26    2.25
  12  -2  12   -0.84    1.79
 -12  -2 -12    5.13    2.02
 -12   2 -12   -0.36    2.23
  12   2  13    2.53    2.57
  12  -2  13    7.61    2.48
 -12  -2 -13   -0.30    2.26
  12  -2  14    5.91    3.13
 -12  -2 -14    0.64    2.61
 -12   2 -14   -0.59    2.77
  12  -4 -17    6.58    3.59
 -12   4  17    2.98    2.90
 -12  -4  17    0.29    2.64
  12  -4 -16    0.48    2.31
  12   4 -16   -0.28    2.00
 -12   4  16   -0.19    1.97
 -12  -4  16   -0.40    1.80
 -12  -4  16    1.25    1.97
  12  -4 -15    7.23    3.37
  12   4 -15    5.40    2.76
 -12   4  15    3.43    1.94
 -12  -4  15    1.80    2.47
 -12  -4  15    3.20    2.53
  12  -4 -14    0.29    2.23
  12   4 -14    0.42    1.84
 -12   4  14   -1.47    1.74
 -12  -4  14   -0.27    1.68
 -12  -4  14    0.26    1.74
  12  -4 -13   12.53    3.41
  12   4 -13   11.78    2.81
 -12   4  13   13.29    3.08
 -12  -4  13   14.55    3.24
 -12  -4  13   17.69    3.10
  12  -4 -12   -1.02    1.45
  12   4 -12    3.60    1.55
 -12   4  12   -0.75    1.30
 -12  -4  12   -1.35    1.11
 -12  -4  12    1.36    1.45
  12  -4 -11   13.18    3.81
  12   4 -11   17.21    3.14
 -12   4  11   14.82    2.82
 -12  -4  11   12.85    2.54
 -12  -4  11   22.57    2.63
  12  -4 -10   -0.63    1.44
  12   4 -10   -0.49    1.38
 -12   4  10    0.29    0.75
 -12  -4  10    0.83    1.00
 -12  -4  10   -0.17    1.44
  12  -4  -9    4.56    2.23
  12   4  -9    4.27    1.80
 -12   4   9    0.61    1.59
 -12  -4   9    2.37    1.19
 -12  -4   9    1.45    1.53
  12  -4  -8    0.03    1.92
  12   4  -8    2.41    1.41
 -12   4   8   -0.26    1.31
 -12   4   8    1.33    1.13
 -12  -4   8    1.72    0.84
 -12  -4   8   -0.22    1.60
  12  -4  -7   78.95    6.00
  12   4  -7   82.25    5.41
 -12   4   7   82.83    4.68
 -12   4   7   78.78    4.41
 -12  -4   7   79.01    3.42
 -12  -4   7   82.49    5.20
  12  -4  -6    3.62    1.91
  12   4  -6    3.78    1.79
 -12   4   6    3.25    1.30
 -12   4   6    2.99    1.56
 -12  -4   6    3.88    1.91
  12  -4  -5   78.20    5.02
  12   4  -5   79.86    4.95
 -12   4   5   77.69    4.20
 -12   4   5   80.64    4.67
 -12  -4   5   73.52    4.94
  12  -4  -4   -0.03    1.44
  12   4  -4   -0.43    1.31
 -12   4   4    1.72    0.93
 -12   4   4   -0.42    1.17
 -12  -4   4    0.33    1.42
  12  -4  -3   11.20    2.43
  12   4  -3   12.59    1.93
 -12   4   3    9.46    1.41
 -12   4   3    8.31    2.02
 -12  -4   3    9.84    2.02
  12  -4  -2    4.86    1.62
  12   4  -2    0.33    1.56
 -12   4   2    0.70    0.92
 -12   4   2    2.38    1.21
 -12  -4   2    2.02    1.27
  12  -4  -1   13.19    1.66
  12  -4  -1   15.78    2.32
  12   4  -1   13.88    2.43
 -12   4   1   13.61    1.99
 -12  -4   1   14.99    2.19
  12  -4   0    0.54    0.84
  12  -4   0   -0.82    1.10
  12   4   0    1.58    1.15
 -12   4   0   -1.21    0.96
 -12  -4   0    1.52    1.39
  12  -4   1   54.44    3.48
  12  -4   1   54.38    3.82
  12   4   1   56.89    4.08
 -12   4  -1   54.21    4.02
 -12  -4  -1   57.07    4.54
  12  -4   2    1.37    1.01
  12  -4   2   -1.03    1.15
  12   4   2    0.78    1.19
 -12   4  -2    4.37    1.52
 -12  -4  -2    0.27    1.63
  12  -4   3    9.16    1.80
  12  -4   3   10.88    1.69
  12   4   3    7.00    1.93
 -12   4  -3    7.47    2.23
 -12  -4  -3   10.69    2.32
  12  -4   4   -1.34    1.40
  12  -4   4    2.69    1.10
  12   4   4    0.97    1.52
 -12   4  -4    0.62    1.55
 -12  -4  -4    0.85    1.63
  12  -4   5    0.64    1.45
  12  -4   5    0.47    1.08
  12   4   5    1.79    1.48
 -12   4  -5    1.68    1.29
 -12  -4  -5   -0.78    1.50
  12  -4   6   -0.78    1.51
  12  -4   6    0.17    1.03
  12   4   6    1.07    1.23
 -12   4  -6    0.78    1.37
 -12  -4  -6    1.31    1.38
  12  -4   7   -0.56    1.74
  12  -4   7    2.31    1.22
  12   4   7    1.85    1.82
  12   4   7    2.61    0.98
 -12   4  -7    0.89    1.95
 -12  -4  -7    1.65    1.81
  12  -4   8    0.08    0.77
  12   4   8   -0.15    1.15
  12   4   8   -0.09    0.75
  12  -4   8   -0.59    1.45
 -12  -4  -8    0.78    1.26
  12  -4   9    7.15    2.61
  12  -4   9    4.24    1.43
  12   4   9    4.57    2.32
  12   4   9    4.82    1.63
 -12   4  -9    6.81    2.21
 -12  -4  -9    0.42    2.10
  12   4  10   -0.64    1.62
  12   4  10    1.97    1.37
 -12   4 -10    0.53    2.04
 -12  -4 -10    0.66    1.49
  12  -4  11    0.99    2.74
  12   4  11    0.94    2.34
 -12   4 -11    0.47    1.99
 -12  -4 -11    6.33    2.11
  12   4  12    1.41    2.33
 -12   4 -12   -0.81    2.37
 -12  -4 -12    1.98    1.65
  12  -4  13    7.13    3.73
  12   4  13    2.75    2.86
 -12   4 -13    1.66    3.15
  12  -4  14   -2.30    2.64
 -12   4 -14    0.75    3.05
 -12  -4 -14    7.97    2.97
  12   6 -16   -0.09    2.44
  12  -6 -16    0.49    2.76
 -12   6  16    1.91    2.52
  12  -6 -15    7.50    3.57
  12   6 -15    6.40    3.14
 -12  -6  15    7.15    3.42
 -12   6  15    6.16    3.40
  12   6 -14    5.03    3.00
  12   6 -14    6.21    2.73
  12  -6 -14    8.94    2.90
 -12  -6  14    2.75    2.89
 -12   6  14    6.72    3.16
  12   6 -13   11.36    3.03
  12  -6 -13   13.72    3.85
  12   6 -13   19.94    3.47
 -12  -6  13    7.00    2.59
 -12   6  13   12.71    3.02
  12   6 -12    2.27    2.11
  12   6 -12    0.50    1.99
  12  -6 -12    5.34    2.45
 -12  -6  12    4.55    2.15
 -12   6  12    8.87    2.59
  12   6 -11    7.39    2.50
  12  -6 -11    3.09    3.17
  12   6 -11    5.49    2.67
 -12  -6  11    7.91    2.20
 -12   6  11    8.81    2.17
  12   6 -10   -0.81    1.47
  12   6 -10    2.87    1.50
  12  -6 -10    2.37    2.17
 -12  -6  10   -0.97    1.29
 -12   6  10    0.26    1.59
  12   6  -9    2.63    1.73
  12  -6  -9    4.33    2.05
 -12  -6   9    1.05    1.16
 -12   6   9    1.71    1.80
  12  -6  -8    0.09    2.58
  12   6  -8    0.69    1.88
 -12  -6   8    4.85    1.11
 -12  -6   8    0.35    2.05
 -12   6   8    5.68    1.84
 -12   6   8    2.63    1.18
  12   6  -7   52.43    3.95
  12  -6  -7   45.96    4.92
 -12  -6   7   46.37    2.87
 -12  -6   7   48.83    4.29
 -12   6   7   46.27    3.20
 -12   6   7   48.86    3.99
  12   6  -6   44.95    3.99
  12  -6  -6   44.34    4.19
 -12  -6   6   47.19    4.54
 -12   6   6   49.98    3.93
 -12   6   6   46.55    3.29
  12   6  -5    8.41    2.34
  12  -6  -5   12.20    2.67
 -12  -6   5    6.22    2.42
 -12   6   5   10.63    1.99
 -12   6   5   11.30    2.04
  12   6  -4    6.02    2.20
  12  -6  -4    9.05    2.00
 -12  -6   4    5.65    2.20
 -12   6   4    6.97    1.83
 -12   6   4    9.78    1.89
  12   6  -3    5.03    1.73
  12  -6  -3    7.96    2.23
 -12  -6   3    8.16    2.09
 -12   6   3    7.96    1.91
 -12   6   3   10.67    2.03
  12   6  -2    1.28    1.21
  12  -6  -2    1.68    1.56
 -12  -6   2    5.05    1.78
 -12   6   2    0.13    1.29
 -12   6   2   -0.11    1.56
  12  -6  -1   11.08    1.96
  12  -6  -1    7.91    1.96
  12   6  -1    4.88    2.39
 -12  -6   1    7.55    2.53
 -12   6   1   11.50    2.00
  12   6   0   17.81    3.00
  12  -6   0   14.43    2.36
  12  -6   0   18.93    2.44
 -12  -6   0   15.91    3.05
 -12   6   0   15.66    2.85
  12   6   1   26.67    3.08
  12  -6   1   30.23    3.14
  12  -6   1   28.55    2.69
 -12  -6  -1   29.94    3.20
 -12   6  -1   29.08    3.57
  12   6   2   19.88    2.71
  12  -6   2   20.12    2.93
  12  -6   2   20.88    2.21
 -12  -6  -2   23.52    3.32
 -12   6  -2   23.36    2.78
  12  -6   3    9.25    2.32
  12  -6   3    7.41    1.46
  12   6   3    9.40    2.38
 -12  -6  -3    8.13    2.39
 -12   6  -3   12.67    2.56
  12   6   4    1.21    1.52
  12  -6   4   -0.08    0.86
  12  -6   4   -1.37    1.45
 -12  -6  -4   -1.51    1.55
 -12   6  -4   -0.75    1.66
  12   6   5    0.78    1.25
  12  -6   5    0.61    1.53
  12  -6   5   -0.07    0.71
 -12  -6  -5   -0.59    1.49
 -12   6  -5    1.27    1.34
  12   6   6    1.85    1.58
  12  -6   6    0.02    2.03
 -12  -6  -6    0.35    1.82
 -12   6  -6    3.96    2.02
  12   6   7    2.88    2.03
  12  -6   7    5.12    2.57
 -12  -6  -7    2.44    2.00
 -12   6  -7    5.79    2.60
  12   6   8    1.14    1.88
  12  -6   8    8.09    2.88
 -12  -6  -8    4.57    1.96
 -12   6  -8    3.75    2.72
  12   6   9    1.55    1.84
  12  -6   9    0.80    2.69
 -12  -6  -9    0.79    1.94
 -12   6  -9    6.51    2.55
  12   6  10   -0.29    1.87
  12  -6  10    6.97    2.63
 -12  -6 -10    1.50    1.76
 -12   6 -10   -1.82    2.53
  12   6  11    0.94    2.79
  12  -6  11    8.79    3.46
 -12   6 -11    2.65    3.00
  12   6  12    0.92    2.47
  12  -6  12    0.83    2.94
  12   8 -14    2.53    3.43
  12  -8 -14    7.66    3.89
 -12   8  14   10.77    3.07
  12   8 -13   -0.72    2.57
  12  -8 -13   -0.51    2.84
 -12   8  13   -1.83    2.48
  12   8 -12   27.70    4.71
  12  -8 -12   24.66    5.05
 -12   8  12   25.67    4.55
  12   8 -11    0.50    1.94
  12   8 -11    1.52    2.28
  12  -8 -11    1.20    2.11
 -12   8  11    1.77    2.33
  12   8 -10    6.58    2.61
  12   8 -10    6.61    2.49
  12  -8 -10    7.90    2.61
 -12   8  10    9.93    2.90
  12   8  -9   -1.82    1.89
  12   8  -9   -0.21    1.75
  12  -8  -9    3.02    2.24
 -12   8   9    2.14    1.92
  12   8  -8    8.35    2.50
  12   8  -8    7.49    2.50
  12  -8  -8    9.01    3.28
 -12   8   8    8.01    2.81
  12   8  -7    0.27    1.18
  12   8  -7    3.61    1.72
  12  -8  -7   -0.13    2.36
 -12   8   7    4.28    1.49
 -12   8   7   -0.15    1.91
  12   8  -6   51.97    4.51
  12  -8  -6   59.74    5.36
 -12  -8   6   51.24    5.17
 -12   8   6   59.00    4.96
 -12   8   6   48.87    3.93
  12   8  -5    3.23    1.81
  12  -8  -5    1.36    2.19
 -12  -8   5    2.74    2.11
 -12   8   5    0.86    1.59
  12   8  -4    4.13    2.28
  12  -8  -4    7.62    2.54
 -12  -8   4    8.92    2.71
 -12   8   4    5.11    2.31
 -12   8   4    7.92    2.17
  12   8  -3   -0.26    1.74
  12  -8  -3    1.27    1.50
 -12   8   3    4.22    1.78
 -12   8   3    0.71    1.75
  12   8  -2    1.38    1.91
  12  -8  -2    3.87    1.72
 -12  -8   2    4.06    1.78
 -12   8   2   -1.36    1.85
 -12   8   2    3.45    1.52
  12   8  -1   -1.53    1.73
  12  -8  -1   -0.08    1.64
 -12  -8   1    5.30    1.96
 -12   8   1    1.12    1.37
  12   8   0    0.54    1.40
  12  -8   0    1.87    1.22
  12  -8   0    0.07    1.61
 -12  -8   0   -0.94    1.77
 -12   8   0    1.07    1.81
  12   8   1   -1.83    1.65
  12  -8   1   -0.11    0.99
 -12  -8  -1    0.07    1.71
 -12   8  -1   -0.95    1.75
  12   8   2   12.21    2.80
  12  -8   2   11.61    2.72
 -12  -8  -2    7.43    2.31
 -12   8  -2    7.77    2.90
  12   8   3    1.04    1.53
  12  -8   3    2.52    2.04
 -12  -8  -3   -0.40    1.99
 -12   8  -3    2.97    2.18
  12   8   4    6.28    2.55
  12  -8   4    3.47    2.65
 -12  -8  -4   10.05    2.66
 -12   8  -4    7.13    2.92
  12   8   5    6.36    2.15
  12  -8   5    0.31    2.15
 -12  -8  -5   -1.67    1.90
 -12   8  -5   -0.46    2.13
  12   8   6    9.98    2.63
  12  -8   6    8.85    3.25
 -12  -8  -6    9.03    2.60
 -12   8  -6    6.59    2.86
  12   8   7   -1.27    1.68
  12  -8   7   -2.04    1.79
 -12  -8  -7   -0.39    1.57
 -12   8  -7    4.52    2.01
  12   8   8    8.16    3.15
  12  -8   8    9.46    3.54
 -12  -8  -8    5.01    2.44
 -12   8  -8    4.93    3.26
  12   8   9   -0.71    1.91
  12  -8   9    8.96    2.98
 -12   8  -9   -0.83    2.42
  12   8  10    6.37    3.29
  12  -8  10    3.64    4.09
 -12   8 -10    8.62    3.07
  12   8  11   -0.71    1.80
  12  -8  11    2.53    2.84
  12 -10 -12    8.03    3.49
 -12  10  12   12.41    3.51
  12  10 -11   -0.23    2.80
  12 -10 -11   -0.29    2.95
 -12  10  11    3.95    2.34
  12  10 -10    0.56    2.04
  12 -10 -10   -0.34    2.48
 -12  10  10    1.69    2.43
  12  10  -9    0.09    2.41
  12 -10  -9   -0.72    2.95
 -12  10   9   -2.54    2.45
  12  10  -8    7.14    3.46
  12 -10  -8    8.45    3.78
 -12  10   8   11.02    2.88
  12  10  -7    8.83    2.44
  12  10  -7    0.93    2.24
  12 -10  -7    4.44    3.28
 -12  10   7    5.16    2.79
  12  10  -6   17.58    3.52
  12 -10  -6   17.78    3.88
 -12  10   6   18.24    3.81
  12  10  -5    7.84    2.68
  12 -10  -5    6.09    2.80
 -12 -10   5    5.33    2.44
 -12  10   5    4.80    2.38
 -12  10   5    8.28    2.51
  12  10  -4   10.13    3.03
  12 -10  -4   12.46    3.08
 -12 -10   4    9.50    3.40
 -12  10   4    9.03    3.29
 -12  10   4   12.95    2.86
  12  10  -3    5.79    2.59
  12 -10  -3    4.43    2.06
 -12 -10   3   10.79    3.04
 -12  10   3    8.86    2.84
 -12  10   3    7.43    2.68
  12  10  -2   -0.31    2.00
  12 -10  -2   -0.83    2.11
 -12 -10   2    1.72    2.22
 -12  10   2    4.74    2.09
  12  10  -1    0.94    1.68
  12 -10  -1    2.19    1.76
 -12 -10   1    1.74    2.37
 -12  10   1   -0.67    2.08
  12  10   0   16.70    3.42
  12 -10   0   13.07    2.88
 -12 -10   0   18.85    3.22
 -12  10   0   10.07    3.59
  12  10   1    5.58    2.80
  12 -10   1    7.14    3.03
 -12 -10  -1    5.14    2.48
 -12  10  -1    6.47    3.10
  12  10   2   23.79    4.18
  12 -10   2   20.86    4.23
 -12 -10  -2   18.09    3.98
 -12  10  -2   20.26    4.30
  12  10   3    3.24    2.12
  12 -10   3    3.36    2.55
 -12 -10  -3   -0.41    2.31
 -12  10  -3    2.11    2.67
  12  10   4    1.89    2.21
  12 -10   4    2.11    1.99
 -12 -10  -4   -0.94    2.10
  12  10   5    9.38    2.95
  12 -10   5    3.91    3.16
 -12 -10  -5    5.55    2.59
 -12  10  -5   -0.66    3.09
  12  10   6   -1.82    2.65
  12 -10   6    0.09    3.11
 -12 -10  -6    7.87    2.52
 -12  10  -6    1.58    2.97
  12  10   7    2.37    2.28
  12 -10   7    0.95    2.41
 -12  10  -7    0.92    2.84
  12  10   8   -0.07    2.40
  12 -10   8    5.11    3.52
 -12  10  -8    4.94    2.73
 -12  12   6    0.20    2.30
 -12 -12   5    9.64    4.24
 -12  12   5   15.49    4.30
 -12 -12   4   -2.89    2.87
 -12  12   4   -0.19    2.80
  12 -12  -3   10.23    3.57
 -12 -12   3    7.43    3.74
  12 -12  -2    2.15    2.64
  12  12  -2    1.74    2.57
 -12 -12   2    1.00    2.82
 -12  12   2    1.04    2.57
  12  12  -1   10.52    3.20
  12 -12  -1    8.86    3.45
 -12 -12   1    6.61    3.49
 -12  12   1    1.39    3.66
  12 -12   0    1.87    2.95
  12  12   0    0.78    2.61
 -12 -12   0    0.89    2.92
 -12  12   0    3.33    2.80
  12  12   1    9.82    3.42
  12 -12   1    9.57    3.27
 -12 -12  -1    4.76    3.68
 -12  12  -1    9.14    3.89
  12  12   2   -1.29    2.46
  12 -12   2   -0.76    2.79
 -12 -12  -2    0.40    2.57
 -12  12  -2   -2.03    2.70
  12  12   3    6.41    3.32
  12 -12   3    2.61    3.66
 -12 -12  -3    2.40    3.20
 -12  12  -3   10.94    3.88
  13   1 -18    2.77    2.42
  13  -1 -18   -1.25    2.64
 -13  -1  18   -0.80    2.17
 -13   1  18    0.03    2.19
  13   1 -17    0.60    2.82
  13  -1 -17    3.05    3.03
 -13  -1  17    0.63    2.45
 -13   1  17    1.50    2.55
  13   1 -16    9.19    3.31
  13  -1 -16   -0.34    3.52
 -13  -1  16    9.96    2.91
 -13   1  16    3.44    2.82
  13   1 -15   -0.79    2.61
  13  -1 -15    2.36    2.25
 -13  -1  15   -0.12    1.82
 -13  -1  15    2.69    2.03
 -13   1  15    3.20    2.15
  13   1 -14   15.91    3.49
  13  -1 -14   15.90    4.08
 -13  -1  14   21.48    3.06
 -13  -1  14   20.19    3.11
 -13   1  14   18.31    3.35
  13   1 -13    8.36    2.55
  13  -1 -13   10.58    3.11
 -13  -1  13    4.03    2.20
 -13  -1  13    5.83    2.17
 -13   1  13    7.78    1.95
 -13   1  13    4.74    2.23
  13   1 -12    8.09    2.79
  13  -1 -12    7.52    2.96
 -13  -1  12    8.53    2.20
 -13  -1  12    6.47    1.82
 -13   1  12    4.10    1.89
 -13   1  12    4.83    2.01
  13   1 -11    0.84    2.28
  13  -1 -11    4.86    2.33
 -13  -1  11    0.61    1.72
 -13   1  11    4.95    1.47
  13  -1 -10    2.02    1.53
 -13  -1  10    3.97    1.51
 -13  -1  10   -0.68    0.88
 -13   1  10    2.62    1.32
 -13   1  10   -0.94    1.14
  13   1  -9   -1.20    1.63
  13  -1  -9   -1.45    1.21
 -13  -1   9   -0.26    1.24
 -13  -1   9   -0.33    0.68
 -13   1   9    0.07    1.11
 -13   1   9    0.92    0.87
  13   1  -8   33.69    3.83
  13  -1  -8   31.88    3.48
 -13  -1   8   27.43    3.22
 -13  -1   8   27.96    1.85
 -13   1   8   30.29    3.16
 -13   1   8   28.72    2.20
  13   1  -7    8.09    2.32
  13  -1  -7    6.98    2.48
 -13  -1   7    8.37    1.76
 -13  -1   7    6.37    0.83
 -13   1   7    9.84    2.03
 -13   1   7    6.61    1.23
  13   1  -6   61.13    4.41
  13  -1  -6   54.54    4.69
 -13  -1   6   62.55    4.18
 -13  -1   6   52.60    2.14
 -13   1   6   61.28    4.19
 -13   1   6   53.92    2.55
  13   1  -5   12.02    2.51
  13  -1  -5   18.89    2.81
 -13  -1   5   20.65    2.63
 -13   1   5   10.34    2.26
 -13   1   5   11.34    1.01
  13   1  -4   11.87    2.11
  13  -1  -4   15.16    2.23
 -13  -1   4   12.15    2.64
 -13   1   4   12.05    2.45
 -13   1   4   14.36    1.06
  13   1  -3   -1.09    1.55
  13  -1  -3    3.24    1.33
 -13  -1   3    2.59    1.61
 -13   1   3    1.58    1.20
 -13   1   3    1.12    0.42
  13   1  -2    8.23    2.30
  13  -1  -2   10.37    0.82
  13  -1  -2   12.93    2.04
 -13  -1   2    9.52    1.99
 -13   1   2   11.74    2.23
  13   1  -1   26.38    2.98
  13  -1  -1   23.72    1.26
  13  -1  -1   28.79    3.04
 -13  -1   1   26.97    2.84
 -13   1   1   27.35    2.87
  13   1   0   23.42    2.48
  13  -1   0   18.58    1.27
  13  -1   0   22.02    2.73
 -13  -1   0   24.78    2.65
 -13   1   0   25.56    2.76
  13   1   1    9.86    2.23
  13  -1   1   10.57    1.14
  13  -1   1   11.15    1.85
 -13  -1  -1   11.67    2.03
 -13   1  -1    9.46    2.43
  13   1   2   19.33    2.31
  13  -1   2   21.97    1.54
  13  -1   2   21.52    2.68
 -13  -1  -2   19.98    2.99
 -13   1  -2   20.25    2.99
  13   1   3   -0.46    1.27
  13  -1   3   -0.39    0.71
  13  -1   3    0.56    1.34
 -13  -1  -3    5.46    1.61
 -13   1  -3    2.09    1.49
  13   1   4   -0.29    0.96
  13  -1   4    0.61    0.67
  13  -1   4   -1.18    1.00
 -13   1  -4    0.58    1.27
  13   1   5    1.05    0.72
  13   1   5    0.30    1.55
  13  -1   5    0.09    1.05
  13  -1   5    3.51    1.39
 -13  -1  -5    2.97    1.71
 -13   1  -5   -0.05    1.69
  13   1   6   12.89    1.58
  13   1   6   15.97    2.26
  13  -1   6   11.23    2.00
  13  -1   6   14.25    2.47
 -13  -1  -6   13.62    2.33
 -13   1  -6   17.51    2.87
  13   1   7   -0.66    1.68
  13   1   7    3.23    1.30
  13  -1   7    1.35    1.60
  13  -1   7    0.28    1.54
 -13  -1  -7    4.80    1.87
 -13   1  -7    3.55    1.94
  13   1   8    3.09    1.84
  13   1   8   -0.75    1.36
  13  -1   8    2.87    1.50
  13  -1   8    2.50    1.68
 -13  -1  -8    1.06    1.60
 -13   1  -8    5.13    1.98
  13   1   9   -0.65    1.71
  13  -1   9    0.62    1.59
  13  -1   9    0.91    1.51
 -13  -1  -9    0.15    1.76
 -13   1  -9    1.49    1.82
  13   1  10    5.89    2.15
  13   1  10    4.49    1.96
  13  -1  10   -0.30    2.03
  13  -1  10   -0.98    1.85
 -13  -1 -10    2.39    2.24
 -13   1 -10    0.56    2.20
  13   1  11   -0.20    2.43
  13   1  11    3.46    2.15
  13  -1  11    5.29    2.48
  13  -1  11    2.11    2.06
 -13  -1 -11    2.29    2.38
 -13   1 -11    2.84    2.57
  13   1  12    3.84    2.37
  13  -1  12    4.19    2.73
  13  -1  12   -0.63    2.20
 -13  -1 -12    1.73    2.42
 -13   1 -12    3.27    2.35
  13   1  13    0.14    2.74
  13  -1  13    8.32    3.17
 -13  -1 -13    6.73    2.68
 -13   1 -13   -1.45    2.80
 -13   1 -14    1.45    2.19
  13   3 -17   -0.01    2.95
  13  -3 -17    2.40    3.22
 -13   3  17    2.65    2.17
  13   3 -16    0.48    2.22
  13  -3 -16    5.89    2.04
 -13  -3  16   -2.09    1.84
 -13  -3  16   -1.82    1.82
 -13   3  16   -2.48    1.97
  13   3 -15   11.60    3.50
  13  -3 -15   11.60    3.39
 -13  -3  15    9.31    3.01
 -13  -3  15    6.92    2.99
 -13   3  15   15.41    3.11
  13   3 -14    4.24    2.96
  13  -3 -14    8.12    3.33
 -13  -3  14    6.80    2.59
 -13  -3  14    6.19    2.38
 -13   3  14    4.53    2.54
  13   3 -13   12.23    3.16
  13  -3 -13   15.91    3.65
 -13  -3  13    7.79    2.82
 -13  -3  13   11.72    2.51
 -13   3  13   10.41    2.91
  13   3 -12    1.33    2.39
  13  -3 -12    6.28    2.28
 -13  -3  12    1.49    1.71
 -13  -3  12    1.29    2.10
 -13   3  12    5.42    1.96
  13   3 -11    8.38    2.91
  13  -3 -11   13.54    2.80
 -13  -3  11   11.57    2.59
 -13  -3  11    8.28    1.72
 -13   3  11    8.97    1.74
 -13   3  11   10.80    2.39
  13   3 -10    1.14    2.05
  13  -3 -10    1.40    2.31
 -13  -3  10    1.53    1.85
 -13  -3  10    0.90    1.23
 -13   3  10    2.71    1.14
 -13   3  10    4.72    1.56
  13   3  -9    2.17    1.83
  13  -3  -9    2.09    2.03
 -13  -3   9   -0.06    1.57
 -13  -3   9   -0.32    0.78
 -13   3   9   -0.01    1.23
 -13   3   9    4.13    1.19
  13   3  -8   -1.22    1.64
  13  -3  -8    0.94    1.77
 -13  -3   8   -1.76    1.68
 -13  -3   8    2.54    0.73
 -13   3   8    1.28    1.22
 -13   3   8    0.99    1.34
  13   3  -7  117.74    7.04
  13  -3  -7  120.01    7.59
 -13  -3   7  128.39    7.29
 -13   3   7  112.95    5.40
 -13   3   7  124.57    6.41
  13   3  -6   36.57    3.82
  13  -3  -6   33.60    3.51
 -13  -3   6   33.14    3.27
 -13   3   6   36.56    2.47
 -13   3   6   34.93    3.51
  13   3  -5   17.75    3.02
  13  -3  -5   20.59    2.76
 -13  -3   5   21.21    2.67
 -13   3   5   24.02    2.01
 -13   3   5   23.09    2.99
  13   3  -4    1.27    1.73
  13  -3  -4    5.47    1.92
 -13  -3   4    1.66    1.75
 -13   3   4    1.66    0.83
 -13   3   4    4.39    1.63
  13   3  -3   -0.07    1.20
 -13  -3   3    2.09    1.22
 -13   3   3    0.57    0.71
 -13   3   3   -0.42    1.31
  13   3  -2    1.64    1.35
  13  -3  -2    3.52    1.69
  13  -3  -2    2.16    0.84
 -13  -3   2    4.70    1.85
 -13   3   2    1.97    1.68
  13   3  -1    4.45    1.99
  13  -3  -1    7.39    1.11
  13  -3  -1    6.04    1.97
 -13  -3   1    5.61    2.22
 -13   3   1    4.33    2.07
  13   3   0    3.99    2.00
  13  -3   0    7.70    1.14
  13  -3   0    3.99    1.79
 -13  -3   0    2.15    2.24
 -13   3   0    4.92    2.05
  13   3   1   15.41    2.63
  13  -3   1   22.94    1.90
  13  -3   1   21.36    2.69
 -13  -3  -1   18.76    2.63
 -13   3  -1   22.91    2.62
  13   3   2   10.91    2.30
  13  -3   2    5.63    1.37
  13  -3   2    9.91    2.07
 -13  -3  -2    5.30    2.33
 -13   3  -2    9.80    1.97
  13   3   3    1.27    1.66
  13  -3   3    2.43    1.14
  13  -3   3    1.79    1.33
 -13  -3  -3   -1.32    1.41
 -13   3  -3    4.99    1.71
  13   3   4    1.97    1.73
  13  -3   4    0.12    1.29
  13  -3   4   -0.69    1.16
 -13  -3  -4    5.06    1.76
 -13   3  -4    2.57    1.37
  13   3   5   -1.20    1.51
  13  -3   5    3.25    1.26
  13  -3   5    0.12    1.17
 -13  -3  -5    0.53    1.68
 -13   3  -5   -0.57    1.58
  13   3   6    0.88    1.29
  13  -3   6    1.95    1.36
  13  -3   6   -1.07    1.19
 -13  -3  -6   -1.65    1.57
 -13   3  -6    1.70    1.25
  13   3   7    5.02    2.00
  13  -3   7    9.00    2.09
  13  -3   7    7.06    1.85
 -13  -3  -7    9.95    2.05
 -13   3  -7    6.27    2.54
  13   3   8    6.04    2.08
  13  -3   8    1.27    2.00
  13  -3   8    4.77    1.51
 -13  -3  -8   -1.38    1.52
 -13   3  -8   -0.80    1.76
  13   3   9    6.11    2.67
  13  -3   9    1.88    2.42
  13  -3   9    4.36    1.83
 -13  -3  -9    4.92    2.25
 -13   3  -9    5.67    2.46
  13   3  10    0.71    1.94
  13  -3  10    0.95    2.21
  13  -3  10    0.17    1.37
 -13   3 -10    1.73    2.13
  13   3  11   -1.67    2.03
  13  -3  11    5.64    2.40
 -13  -3 -11    0.33    1.74
 -13   3 -11    0.07    2.34
  13   3  12   -0.19    2.26
  13  -3  12    0.07    2.45
 -13  -3 -12   -0.40    1.97
 -13   3 -12    5.51    2.44
  13   3  13    1.53    2.02
  13  -3  13    2.50    2.80
 -13   3 -13   -1.50    2.52
  13  -5 -16    2.02    3.11
 -13   5  16    0.28    2.66
 -13  -5  16    1.51    2.60
  13  -5 -15    7.28    3.60
  13   5 -15   -1.54    3.12
 -13   5  15    8.45    3.23
 -13  -5  15    7.79    3.08
  13  -5 -14    6.17    2.45
  13   5 -14    2.64    2.63
 -13   5  14    1.36    2.59
 -13  -5  14    1.93    2.54
 -13  -5  14    2.18    2.47
  13  -5 -13   27.56    5.03
  13   5 -13   20.57    3.98
 -13   5  13   25.19    4.11
 -13  -5  13   19.55    3.58
 -13  -5  13   21.49    3.77
  13  -5 -12    2.71    2.56
  13   5 -12    0.28    2.00
 -13   5  12   -0.22    1.90
 -13  -5  12   -0.11    1.99
 -13  -5  12    2.12    1.69
  13   5 -11   11.78    3.06
  13  -5 -11   13.95    3.60
 -13   5  11    9.95    2.83
 -13  -5  11   15.71    2.23
 -13  -5  11   13.01    2.69
  13  -5 -10    1.03    2.05
  13   5 -10   -0.18    1.78
 -13   5  10    0.66    1.57
 -13  -5  10    0.57    1.09
 -13  -5  10    1.53    1.79
  13  -5  -9    2.51    1.93
  13   5  -9   -0.04    1.94
 -13   5   9    2.39    1.12
 -13   5   9    2.78    1.70
 -13  -5   9    0.67    1.57
  13  -5  -8    7.20    2.41
  13   5  -8    0.47    1.97
 -13   5   8    1.09    1.48
 -13   5   8    6.97    1.78
 -13  -5   8    3.20    1.70
  13  -5  -7  100.68    6.51
  13   5  -7   92.31    6.14
 -13   5   7   97.35    5.51
 -13   5   7   83.85    4.78
 -13  -5   7   88.92    6.29
  13  -5  -6    7.32    2.67
  13   5  -6    5.88    1.94
 -13   5   6    9.04    1.93
 -13   5   6    7.09    1.98
 -13  -5   6    8.45    2.63
  13  -5  -5   66.33    5.38
  13   5  -5   70.40    4.72
 -13   5   5   70.14    4.32
 -13   5   5   67.98    4.60
 -13  -5   5   71.11    5.58
  13  -5  -4    8.58    2.33
  13   5  -4    5.26    1.83
 -13   5   4    5.69    1.96
 -13   5   4    8.46    1.61
 -13  -5   4    6.01    2.22
  13  -5  -3   -0.05    1.41
  13   5  -3   -0.45    1.43
 -13   5   3    0.90    1.34
 -13   5   3   -0.68    0.95
 -13  -5   3   -1.16    1.23
  13  -5  -2   -0.95    1.19
  13   5  -2    0.01    1.31
 -13   5   2    0.48    1.25
 -13  -5   2    0.39    1.37
  13  -5  -1   43.22    3.25
  13  -5  -1   41.79    3.79
  13   5  -1   37.67    3.43
 -13   5   1   46.65    4.09
 -13  -5   1   41.18    4.14
  13  -5   0    5.29    1.95
  13  -5   0    5.75    1.76
  13   5   0   10.95    2.30
 -13   5   0    6.37    2.15
 -13  -5   0    4.77    2.43
  13  -5   1   37.36    3.18
  13  -5   1   38.36    3.33
  13   5   1   41.38    4.08
 -13   5  -1   38.57    3.65
 -13  -5  -1   41.97    4.19
  13   5   2   -1.19    1.40
  13  -5   2    1.39    1.44
  13  -5   2    1.74    1.19
 -13   5  -2    4.75    1.51
 -13  -5  -2    2.31    1.87
  13   5   3    1.81    1.75
  13  -5   3    2.76    1.21
 -13   5  -3    0.04    1.79
 -13  -5  -3   -1.22    1.85
  13  -5   4   -1.47    1.31
  13  -5   4    0.72    0.94
 -13   5  -4   -0.76    1.52
 -13  -5  -4   -0.46    1.47
  13  -5   5    9.59    1.69
  13  -5   5   13.48    2.66
  13   5   5   12.05    2.72
 -13   5  -5   10.46    2.59
 -13  -5  -5   11.11    2.70
  13  -5   6    6.82    2.12
  13  -5   6    0.98    1.12
  13   5   6    0.89    1.99
 -13   5  -6    1.15    1.98
 -13  -5  -6    0.55    1.86
  13  -5   7   12.23    2.95
  13   5   7    5.36    2.25
 -13   5  -7    6.61    2.75
 -13  -5  -7    7.49    2.78
  13  -5   8    5.34    2.45
  13   5   8    1.62    1.87
 -13   5  -8    2.06    2.28
 -13  -5  -8    0.14    2.00
  13  -5   9   -0.08    1.85
  13   5   9   -0.06    1.71
 -13  -5  -9    0.91    1.52
 -13   5  -9   -0.72    1.84
  13   5  10   -2.16    1.98
  13  -5  10   -2.01    2.06
 -13  -5 -10    2.41    1.76
  13  -5  11    3.25    2.55
  13   5  11    1.31    2.21
 -13   5 -11    0.31    1.96
 -13  -5 -11   -0.63    1.92
  13   5  12    1.64    2.62
 -13   5 -12    2.05    2.95
  13   7 -15    3.96    2.39
  13  -7 -15    2.48    3.46
 -13   7  15    0.83    2.58
  13   7 -14    5.23    2.80
  13  -7 -14    8.64    3.38
 -13   7  14    6.69    3.37
  13   7 -13    1.61    1.97
  13   7 -13   -1.89    1.78
  13  -7 -13   -2.89    2.52
 -13   7  13    0.88    1.74
  13   7 -12    5.38    1.95
  13   7 -12    5.89    2.80
  13  -7 -12    8.72    3.16
 -13   7  12    8.30    3.08
  13   7 -11    0.76    2.23
  13  -7 -11   -0.73    2.38
 -13   7  11    4.87    1.99
  13   7 -10   -0.92    1.79
  13  -7 -10    0.15    1.91
 -13  -7  10    1.78    2.03
 -13   7  10    1.64    1.88
  13   7  -9    6.40    2.16
  13  -7  -9    5.51    2.70
 -13  -7   9    3.65    2.50
 -13   7   9   -1.74    2.17
  13   7  -8   17.41    3.03
  13  -7  -8   12.68    3.12
 -13  -7   8   16.69    3.24
 -13   7   8    9.81    2.94
  13   7  -7   19.65    3.14
  13  -7  -7   19.84    3.20
 -13  -7   7   17.87    3.53
 -13   7   7   19.12    3.11
 -13   7   7   15.76    2.33
  13   7  -6   50.64    4.84
  13  -7  -6   50.50    5.05
 -13  -7   6   37.39    4.86
 -13   7   6   48.64    4.34
 -13   7   6   47.99    3.92
  13   7  -5    2.79    2.02
  13  -7  -5    6.17    2.51
 -13  -7   5    5.32    2.04
 -13   7   5    4.12    1.90
 -13   7   5    6.96    2.07
  13   7  -4   -0.14    1.00
  13  -7  -4   -1.50    1.32
 -13  -7   4    1.46    1.21
 -13   7   4   -1.60    1.24
 -13   7   4    1.28    1.17
  13   7  -3   -1.03    1.32
  13  -7  -3    5.50    1.37
 -13  -7   3   -1.43    1.49
 -13   7   3   -1.62    1.17
 -13   7   3   -0.57    1.20
  13   7  -2   -1.34    1.72
  13  -7  -2    4.85    1.49
 -13  -7   2   -1.39    1.93
 -13   7   2    0.80    1.34
  13   7  -1   26.55    3.37
  13  -7  -1   18.13    2.73
  13  -7  -1   12.60    2.59
 -13  -7   1   17.59    3.29
 -13   7   1   20.72    3.10
  13   7   0   20.82    3.42
  13  -7   0   16.33    2.84
  13  -7   0   18.35    2.35
 -13  -7   0   21.77    3.48
 -13   7   0   19.61    3.21
  13   7   1   12.08    2.59
  13  -7   1   15.77    2.40
  13  -7   1   11.04    1.95
 -13  -7  -1   16.62    3.08
 -13   7  -1   11.47    2.87
  13   7   2    4.95    1.99
  13  -7   2   10.44    2.46
  13  -7   2    8.34    1.72
 -13  -7  -2    9.10    2.68
 -13   7  -2    5.09    2.15
  13   7   3    0.97    1.60
  13  -7   3   -1.12    1.81
  13  -7   3    3.38    1.22
 -13  -7  -3    0.14    1.94
 -13   7  -3    2.18    2.08
  13   7   4    5.74    2.12
  13  -7   4    5.85    2.42
 -13  -7  -4    6.18    2.20
 -13   7  -4    7.65    2.77
  13   7   5    5.43    2.16
  13  -7   5    1.45    2.19
 -13  -7  -5    1.39    2.08
 -13   7  -5   -0.73    1.84
  13   7   6    5.00    2.34
  13  -7   6    3.42    2.45
 -13  -7  -6   -0.19    2.10
 -13   7  -6   -0.19    2.30
  13   7   7    0.30    1.88
  13  -7   7   -0.53    1.68
 -13  -7  -7    0.74    1.55
 -13   7  -7    0.11    1.91
  13   7   8    2.75    2.76
  13  -7   8    3.40    3.15
 -13  -7  -8    8.98    2.62
 -13   7  -8    2.90    2.29
  13   7   9    0.67    2.18
  13  -7   9    7.11    3.15
 -13  -7  -9    1.70    2.18
 -13   7  -9    2.57    2.72
  13   7  10    1.09    2.75
  13  -7  10    1.09    3.25
 -13   7 -10    4.74    3.06
  13   7  11   -1.49    2.87
  13  -7  11    3.12    2.78
 -13   7 -11    5.77    3.22
  13   9 -12    9.65    3.74
  13  -9 -12    7.71    3.59
 -13   9  12    6.00    3.45
  13   9 -11   -2.42    2.37
  13  -9 -11    2.44    2.37
 -13   9  11    1.65    2.38
  13   9 -10    1.23    2.03
  13  -9 -10    1.20    2.51
 -13   9  10    0.98    2.01
  13   9  -9    0.88    1.75
  13  -9  -9   -2.37    2.43
 -13   9   9   -1.11    2.11
  13   9  -8   15.18    2.96
  13  -9  -8   11.13    3.74
 -13  -9   8   10.40    3.50
 -13   9   8   12.50    3.48
  13   9  -7    4.66    2.26
  13  -9  -7    3.64    2.73
 -13  -9   7    0.68    2.55
 -13   9   7    0.99    2.47
  13   9  -6   31.17    4.13
  13  -9  -6   25.39    4.28
 -13  -9   6   23.20    3.78
 -13   9   6   21.82    3.52
 -13   9   6   38.66    4.41
  13   9  -5    5.85    2.53
  13  -9  -5    7.98    2.79
 -13  -9   5    8.73    2.81
 -13   9   5    2.56    2.71
 -13   9   5    2.38    2.37
  13   9  -4    7.07    2.66
  13  -9  -4    4.31    2.63
 -13  -9   4    7.26    3.06
 -13   9   4    8.58    2.48
 -13   9   4   11.40    2.91
  13  -9  -3    0.09    1.81
 -13  -9   3    5.62    2.42
 -13   9   3    3.52    2.17
 -13   9   3   -0.31    2.08
  13   9  -2    6.32    2.82
  13  -9  -2    6.48    2.30
  13  -9  -2    7.54    2.18
 -13  -9   2    4.96    3.02
 -13   9   2   11.08    2.81
  13   9  -1   11.94    2.83
  13  -9  -1    3.75    2.13
  13  -9  -1    5.05    1.85
 -13  -9   1    5.59    3.07
 -13   9   1    5.26    2.28
  13   9   0   28.33    4.04
  13  -9   0   24.94    3.98
 -13  -9   0   21.16    3.69
 -13   9   0   24.87    4.04
  13   9   1    2.52    2.68
  13  -9   1    3.69    2.58
 -13  -9  -1    8.76    2.36
 -13   9  -1    3.95    2.38
  13   9   2    7.99    2.55
  13  -9   2   11.84    3.09
 -13  -9  -2    4.95    2.95
 -13   9  -2   10.37    3.12
  13   9   3    1.22    2.40
 -13  -9  -3    1.10    2.39
 -13   9  -3    5.45    2.65
  13   9   4    4.39    2.17
  13  -9   4    6.68    2.78
 -13  -9  -4   -0.63    2.55
 -13   9  -4   -0.11    2.77
  13  -9   5    0.48    1.89
 -13   9  -5   -1.77    2.22
  13   9   6    8.92    2.79
  13  -9   6    6.32    3.68
 -13  -9  -6   10.02    2.68
 -13   9  -6   12.62    3.98
  13   9   7   -0.25    2.73
  13  -9   7    1.06    3.30
 -13   9  -7    6.09    2.52
  13  -9   8   -1.93    2.85
 -13   9  -8    1.60    2.13
  13 -11  -8    7.02    3.81
 -13  11   8    6.54    3.43
  13 -11  -7   26.13    5.08
 -13 -11   7   33.32    5.61
 -13  11   7   25.02    5.06
  13 -11  -6   12.62    4.22
 -13 -11   6   18.48    3.91
 -13  11   6   17.69    3.70
  13  11  -5   16.35    3.53
  13 -11  -5   23.29    4.12
 -13 -11   5   10.40    4.35
 -13  11   5   15.45    4.33
  13  11  -4    1.93    2.49
 -13 -11   4   -1.00    3.13
 -13  11   4    6.39    2.52
  13  11  -3   -1.36    2.30
  13 -11  -3   -1.40    2.07
 -13 -11   3   -1.37    2.65
  13  11  -2    4.91    2.76
  13 -11  -2    0.20    2.88
 -13 -11   2    1.12    3.28
 -13  11   2    9.23    2.98
  13  11  -1    7.05    3.58
  13 -11  -1   11.40    3.81
 -13 -11   1   15.41    4.16
 -13  11   1   16.11    3.91
  13  11   0    8.24    2.96
  13 -11   0    2.14    2.76
 -13 -11   0   -0.30    2.88
 -13  11   0    1.80    3.11
  13  11   1    6.54    3.12
  13 -11   1    6.13    3.23
 -13 -11  -1    2.13    2.71
 -13  11  -1    8.78    3.67
  13  11   2    1.25    3.07
  13 -11   2    0.63    3.10
 -13 -11  -2   11.31    3.12
 -13  11  -2    0.77    3.23
  13  11   3    8.69    2.81
  13 -11   3   -1.29    3.01
 -13 -11  -3    0.81    2.75
 -13  11  -3    0.35    3.16
  13  11   4    1.41    3.02
  13 -11   4    7.10    3.43
 -13 -11  -4    1.33    2.99
  14   0 -17    1.32    2.64
 -14   0  17   -0.13    2.22
  14   0 -16    5.18    2.99
 -14   0  16    5.81    2.65
  14   0 -15    3.85    2.78
 -14   0  15    0.66    2.11
  14   0 -14   28.41    4.55
 -14   0  14   21.55    3.06
 -14   0  14   23.61    3.45
  14   0 -13    4.09    2.20
 -14   0  13   -1.38    1.57
 -14   0  13    1.10    1.64
  14   0 -12   31.92    4.67
 -14   0  12   37.44    3.39
 -14   0  12   31.35    3.04
  14   0 -11   -1.06    1.74
 -14   0  11    0.30    1.39
  14   0 -10    5.12    2.18
 -14   0  10   -1.12    1.61
 -14   0  10    1.33    0.96
  14   0  -9    2.19    1.76
 -14   0   9    0.80    1.37
 -14   0   9   -0.19    0.71
  14   0  -8  117.47    7.27
 -14   0   8  122.79    6.72
 -14   0   8  108.36    4.40
  14   0  -7   -0.76    1.29
 -14   0   7   -1.26    1.40
 -14   0   7    0.47    0.51
  14   0  -6  140.63    7.97
 -14   0   6  133.45    7.09
  14   0  -5   -0.80    1.50
[truncated: 82,479 more chars]
